# Supplementary material for: Optinalysis: Isometric Isomorphism and Automorphism Through A Looking-Glass
Source: Preprints.org preprint supplement (doi:10.20944/preprints202008.0072.v1), 2020-08-05
Supplement: Supplementary file 2 [file supplementary]

## Sheet: Optinalysis
	OPTINALYSIS: SEQUENCE ANALYSIS THROUGH A LOOKING-GLASS
	CN = Central node; Kc = Kabirian coefficient of similarity; PSim. = Probability level of similarity; PDsim. = Probability level of dissimilarity																NUM. = Numeration; DEN. = Denumeration
				For Kc >1		For Kc <1											For Kc >1			For Kc <1
	RESULTS	CN	Kc	PSim.	PDsim.	PSim.	PDsim.										NUM	DEN		NUM	DEN
	R1	8	1	1	0	1	0										1	1		-1	-1
	R2	0	#DIV/0!	#DIV/0!	#DIV/0!	#DIV/0!	#DIV/0!										#DIV/0!	#DIV/0!		#DIV/0!	#DIV/0!
	R3	0	#DIV/0!	#DIV/0!	#DIV/0!	#DIV/0!	#DIV/0!										#DIV/0!	#DIV/0!		#DIV/0!	#DIV/0!
	R4	0	#DIV/0!	#DIV/0!	#DIV/0!	#DIV/0!	#DIV/0!										#DIV/0!	#DIV/0!		#DIV/0!	#DIV/0!
	R5	0	#DIV/0!	#DIV/0!	#DIV/0!	#DIV/0!	#DIV/0!										#DIV/0!	#DIV/0!		#DIV/0!	#DIV/0!
	R6	0	#DIV/0!	#DIV/0!	#DIV/0!	#DIV/0!	#DIV/0!										#DIV/0!	#DIV/0!		#DIV/0!	#DIV/0!
	R7	0	#DIV/0!	#DIV/0!	#DIV/0!	#DIV/0!	#DIV/0!										#DIV/0!	#DIV/0!		#DIV/0!	#DIV/0!
	R8	0	#DIV/0!	#DIV/0!	#DIV/0!	#DIV/0!	#DIV/0!										#DIV/0!	#DIV/0!		#DIV/0!	#DIV/0!
	R9	0	#DIV/0!	#DIV/0!	#DIV/0!	#DIV/0!	#DIV/0!										#DIV/0!	#DIV/0!		#DIV/0!	#DIV/0!
	R10	0	#DIV/0!	#DIV/0!	#DIV/0!	#DIV/0!	#DIV/0!										#DIV/0!	#DIV/0!		#DIV/0!	#DIV/0!
	R11	0	#DIV/0!	#DIV/0!	#DIV/0!	#DIV/0!	#DIV/0!										#DIV/0!	#DIV/0!		#DIV/0!	#DIV/0!
	R12	0	#DIV/0!	#DIV/0!	#DIV/0!	#DIV/0!	#DIV/0!										#DIV/0!	#DIV/0!		#DIV/0!	#DIV/0!
	R13	0	#DIV/0!	#DIV/0!	#DIV/0!	#DIV/0!	#DIV/0!										#DIV/0!	#DIV/0!		#DIV/0!	#DIV/0!
	R14	0	#DIV/0!	#DIV/0!	#DIV/0!	#DIV/0!	#DIV/0!										#DIV/0!	#DIV/0!		#DIV/0!	#DIV/0!
	R15	0	#DIV/0!	#DIV/0!	#DIV/0!	#DIV/0!	#DIV/0!										#DIV/0!	#DIV/0!		#DIV/0!	#DIV/0!
	R16	0	#DIV/0!	#DIV/0!	#DIV/0!	#DIV/0!	#DIV/0!										#DIV/0!	#DIV/0!		#DIV/0!	#DIV/0!
	R17	0	#DIV/0!	#DIV/0!	#DIV/0!	#DIV/0!	#DIV/0!										#DIV/0!	#DIV/0!		#DIV/0!	#DIV/0!
	R18	0	#DIV/0!	#DIV/0!	#DIV/0!	#DIV/0!	#DIV/0!										#DIV/0!	#DIV/0!		#DIV/0!	#DIV/0!
	R19	0	#DIV/0!	#DIV/0!	#DIV/0!	#DIV/0!	#DIV/0!										#DIV/0!	#DIV/0!		#DIV/0!	#DIV/0!
	R20	0	#DIV/0!	#DIV/0!	#DIV/0!	#DIV/0!	#DIV/0!										#DIV/0!	#DIV/0!		#DIV/0!	#DIV/0!
	SEQUENCES	INPUT SEQUENCE																												SEQUENCES	COMPUTATION AND CALCULATIONS
	QUANTITATIVE SCALE	R1	R2	R3	R4	R5	R6	R7	R8	R9	R10	R11	R12	R13	R14	R15	R16	R17	R18	R19	R20									QUANTITATIVE SCALE	M1	M2	M3	M4	M5	M6	M7	M8	M9	M10	M11	M12	X	X	X	X	X	X	X
	1	5	0	0	0	0	0	0	0	0	0	0	0	0	0	0	0	0	0	0	0									1	5	0	0	0	0	0	0	0	0	0	0	0	0	0	0	0	0	0	0
	2	8	0	0	0	0	0	0	0	0	0	0	0	0	0	0	0	0	0	0	0									2	16	0	0	0	0	0	0	0	0	0	0	0	0	0	0	0	0	0	0
	3	9	0	0	0	0	0	0	0	0	0	0	0	0	0	0	0	0	0	0	0									3	27	0	0	0	0	0	0	0	0	0	0	0	0	0	0	0	0	0	0
	4	5	0	0	0	0	0	0	0	0	0	0	0	0	0	0	0	0	0	0	0									4	20	0	0	0	0	0	0	0	0	0	0	0	0	0	0	0	0	0	0
	5	2	0	0	0	0	0	0	0	0	0	0	0	0	0	0	0	0	0	0	0									5	10	0	0	0	0	0	0	0	0	0	0	0	0	0	0	0	0	0	0
	6	0	0	0	0	0	0	0	0	0	0	0	0	0	0	0	0	0	0	0	0									6	0	0	0	0	0	0	0	0	0	0	0	0	0	0	0	0	0	0	0
	7	6	0	0	0	0	0	0	0	0	0	0	0	0	0	0	0	0	0	0	0									7	42	0	0	0	0	0	0	0	0	0	0	0	0	0	0	0	0	0	0
	8	0	0	0	0	0	0	0	0	0	0	0	0	0	0	0	0	0	0	0	0									8	0	0	0	0	0	0	0	0	0	0	0	0	0	0	0	0	0	0	0
	9	6	0	0	0	0	0	0	0	0	0	0	0	0	0	0	0	0	0	0	0									9	54	0	0	0	0	0	0	0	0	0	0	0	0	0	0	0	0	0	0
	10	0	0	0	0	0	0	0	0	0	0	0	0	0	0	0	0	0	0	0	0									10	0	0	0	0	0	0	0	0	0	0	0	0	0	0	0	0	0	0	0
	11	2	0	0	0	0	0	0	0	0	0	0	0	0	0	0	0	0	0	0	0									11	22	0	0	0	0	0	0	0	0	0	0	0	0	0	0	0	0	0	0
	12	5	0	0	0	0	0	0	0	0	0	0	0	0	0	0	0	0	0	0	0									12	60	0	0	0	0	0	0	0	0	0	0	0	0	0	0	0	0	0	0
	13	9	0	0	0	0	0	0	0	0	0	0	0	0	0	0	0	0	0	0	0									13	117	0	0	0	0	0	0	0	0	0	0	0	0	0	0	0	0	0	0
	14	8	0	0	0	0	0	0	0	0	0	0	0	0	0	0	0	0	0	0	0									14	112	0	0	0	0	0	0	0	0	0	0	0	0	0	0	0	0	0	0
	15	5	0	0	0	0	0	0	0	0	0	0	0	0	0	0	0	0	0	0	0									15	75	0	0	0	0	0	0	0	0	0	0	0	0	0	0	0	0	0	0
	16	0	0	0	0	0	0	0	0	0	0	0	0	0	0	0	0	0	0	0	0									16	0	0	0	0	0	0	0	0	0	0	0	0	0	0	0	0	0	0	0
	17	0	0	0	0	0	0	0	0	0	0	0	0	0	0	0	0	0	0	0	0									17	0	0	0	0	0	0	0	0	0	0	0	0	0	0	0	0	0	0	0
	18	0	0	0	0	0	0	0	0	0	0	0	0	0	0	0	0	0	0	0	0									18	0	0	0	0	0	0	0	0	0	0	0	0	0	0	0	0	0	0	0
	19	0	0	0	0	0	0	0	0	0	0	0	0	0	0	0	0	0	0	0	0									19	0	0	0	0	0	0	0	0	0	0	0	0	0	0	0	0	0	0	0
	20	0	0	0	0	0	0	0	0	0	0	0	0	0	0	0	0	0	0	0	0									20	0	0	0	0	0	0	0	0	0	0	0	0	0	0	0	0	0	0	0
	21	0	0	0	0	0	0	0	0	0	0	0	0	0	0	0	0	0	0	0	0									21	0	0	0	0	0	0	0	0	0	0	0	0	0	0	0	0	0	0	0
	22	0	0	0	0	0	0	0	0	0	0	0	0	0	0	0	0	0	0	0	0									22	0	0	0	0	0	0	0	0	0	0	0	0	0	0	0	0	0	0	0
	23	0	0	0	0	0	0	0	0	0	0	0	0	0	0	0	0	0	0	0	0									23	0	0	0	0	0	0	0	0	0	0	0	0	0	0	0	0	0	0	0
	24	0	0	0	0	0	0	0	0	0	0	0	0	0	0	0	0	0	0	0	0									24	0	0	0	0	0	0	0	0	0	0	0	0	0	0	0	0	0	0	0
	25	0	0	0	0	0	0	0	0	0	0	0	0	0	0	0	0	0	0	0	0									25	0	0	0	0	0	0	0	0	0	0	0	0	0	0	0	0	0	0	0
	26	0	0	0	0	0	0	0	0	0	0	0	0	0	0	0	0	0	0	0	0									26	0	0	0	0	0	0	0	0	0	0	0	0	0	0	0	0	0	0	0
	27	0	0	0	0	0	0	0	0	0	0	0	0	0	0	0	0	0	0	0	0									27	0	0	0	0	0	0	0	0	0	0	0	0	0	0	0	0	0	0	0
	28	0	0	0	0	0	0	0	0	0	0	0	0	0	0	0	0	0	0	0	0									28	0	0	0	0	0	0	0	0	0	0	0	0	0	0	0	0	0	0	0
	29	0	0	0	0	0	0	0	0	0	0	0	0	0	0	0	0	0	0	0	0									29	0	0	0	0	0	0	0	0	0	0	0	0	0	0	0	0	0	0	0
	30	0	0	0	0	0	0	0	0	0	0	0	0	0	0	0	0	0	0	0	0									30	0	0	0	0	0	0	0	0	0	0	0	0	0	0	0	0	0	0	0
	31	0	0	0	0	0	0	0	0	0	0	0	0	0	0	0	0	0	0	0	0									31	0	0	0	0	0	0	0	0	0	0	0	0	0	0	0	0	0	0	0
	32	0	0	0	0	0	0	0	0	0	0	0	0	0	0	0	0	0	0	0	0									32	0	0	0	0	0	0	0	0	0	0	0	0	0	0	0	0	0	0	0
	33	0	0	0	0	0	0	0	0	0	0	0	0	0	0	0	0	0	0	0	0									33	0	0	0	0	0	0	0	0	0	0	0	0	0	0	0	0	0	0	0
	34	0	0	0	0	0	0	0	0	0	0	0	0	0	0	0	0	0	0	0	0									34	0	0	0	0	0	0	0	0	0	0	0	0	0	0	0	0	0	0	0
	35	0	0	0	0	0	0	0	0	0	0	0	0	0	0	0	0	0	0	0	0									35	0	0	0	0	0	0	0	0	0	0	0	0	0	0	0	0	0	0	0
	36	0	0	0	0	0	0	0	0	0	0	0	0	0	0	0	0	0	0	0	0									36	0	0	0	0	0	0	0	0	0	0	0	0	0	0	0	0	0	0	0
	37	0	0	0	0	0	0	0	0	0	0	0	0	0	0	0	0	0	0	0	0									37	0	0	0	0	0	0	0	0	0	0	0	0	0	0	0	0	0	0	0
	38	0	0	0	0	0	0	0	0	0	0	0	0	0	0	0	0	0	0	0	0									38	0	0	0	0	0	0	0	0	0	0	0	0	0	0	0	0	0	0	0
	39	0	0	0	0	0	0	0	0	0	0	0	0	0	0	0	0	0	0	0	0									39	0	0	0	0	0	0	0	0	0	0	0	0	0	0	0	0	0	0	0
	40	0	0	0	0	0	0	0	0	0	0	0	0	0	0	0	0	0	0	0	0									40	0	0	0	0	0	0	0	0	0	0	0	0	0	0	0	0	0	0	0
	41	0	0	0	0	0	0	0	0	0	0	0	0	0	0	0	0	0	0	0	0									41	0	0	0	0	0	0	0	0	0	0	0	0	0	0	0	0	0	0	0
	42	0	0	0	0	0	0	0	0	0	0	0	0	0	0	0	0	0	0	0	0									42	0	0	0	0	0	0	0	0	0	0	0	0	0	0	0	0	0	0	0
	43	0	0	0	0	0	0	0	0	0	0	0	0	0	0	0	0	0	0	0	0									43	0	0	0	0	0	0	0	0	0	0	0	0	0	0	0	0	0	0	0
	44	0	0	0	0	0	0	0	0	0	0	0	0	0	0	0	0	0	0	0	0									44	0	0	0	0	0	0	0	0	0	0	0	0	0	0	0	0	0	0	0
	45	0	0	0	0	0	0	0	0	0	0	0	0	0	0	0	0	0	0	0	0									45	0	0	0	0	0	0	0	0	0	0	0	0	0	0	0	0	0	0	0
	46	0	0	0	0	0	0	0	0	0	0	0	0	0	0	0	0	0	0	0	0									46	0	0	0	0	0	0	0	0	0	0	0	0	0	0	0	0	0	0	0
	47	0	0	0	0	0	0	0	0	0	0	0	0	0	0	0	0	0	0	0	0									47	0	0	0	0	0	0	0	0	0	0	0	0	0	0	0	0	0	0	0
	48	0	0	0	0	0	0	0	0	0	0	0	0	0	0	0	0	0	0	0	0									48	0	0	0	0	0	0	0	0	0	0	0	0	0	0	0	0	0	0	0
	49	0	0	0	0	0	0	0	0	0	0	0	0	0	0	0	0	0	0	0	0									49	0	0	0	0	0	0	0	0	0	0	0	0	0	0	0	0	0	0	0
	50	0	0	0	0	0	0	0	0	0	0	0	0	0	0	0	0	0	0	0	0									50	0	0	0	0	0	0	0	0	0	0	0	0	0	0	0	0	0	0	0
	51	0	0	0	0	0	0	0	0	0	0	0	0	0	0	0	0	0	0	0	0									51	0	0	0	0	0	0	0	0	0	0	0	0	0	0	0	0	0	0	0
	52	0	0	0	0	0	0	0	0	0	0	0	0	0	0	0	0	0	0	0	0									52	0	0	0	0	0	0	0	0	0	0	0	0	0	0	0	0	0	0	0
	53	0	0	0	0	0	0	0	0	0	0	0	0	0	0	0	0	0	0	0	0									53	0	0	0	0	0	0	0	0	0	0	0	0	0	0	0	0	0	0	0
	54	0	0	0	0	0	0	0	0	0	0	0	0	0	0	0	0	0	0	0	0									54	0	0	0	0	0	0	0	0	0	0	0	0	0	0	0	0	0	0	0
	55	0	0	0	0	0	0	0	0	0	0	0	0	0	0	0	0	0	0	0	0									55	0	0	0	0	0	0	0	0	0	0	0	0	0	0	0	0	0	0	0
	56	0	0	0	0	0	0	0	0	0	0	0	0	0	0	0	0	0	0	0	0									56	0	0	0	0	0	0	0	0	0	0	0	0	0	0	0	0	0	0	0
	57	0	0	0	0	0	0	0	0	0	0	0	0	0	0	0	0	0	0	0	0									57	0	0	0	0	0	0	0	0	0	0	0	0	0	0	0	0	0	0	0
	58	0	0	0	0	0	0	0	0	0	0	0	0	0	0	0	0	0	0	0	0									58	0	0	0	0	0	0	0	0	0	0	0	0	0	0	0	0	0	0	0
	59	0	0	0	0	0	0	0	0	0	0	0	0	0	0	0	0	0	0	0	0									59	0	0	0	0	0	0	0	0	0	0	0	0	0	0	0	0	0	0	0
	60	0	0	0	0	0	0	0	0	0	0	0	0	0	0	0	0	0	0	0	0									60	0	0	0	0	0	0	0	0	0	0	0	0	0	0	0	0	0	0	0
	61	0	0	0	0	0	0	0	0	0	0	0	0	0	0	0	0	0	0	0	0									61	0	0	0	0	0	0	0	0	0	0	0	0	0	0	0	0	0	0	0
	62	0	0	0	0	0	0	0	0	0	0	0	0	0	0	0	0	0	0	0	0									62	0	0	0	0	0	0	0	0	0	0	0	0	0	0	0	0	0	0	0
	63	0	0	0	0	0	0	0	0	0	0	0	0	0	0	0	0	0	0	0	0									63	0	0	0	0	0	0	0	0	0	0	0	0	0	0	0	0	0	0	0
	64	0	0	0	0	0	0	0	0	0	0	0	0	0	0	0	0	0	0	0	0									64	0	0	0	0	0	0	0	0	0	0	0	0	0	0	0	0	0	0	0
	65	0	0	0	0	0	0	0	0	0	0	0	0	0	0	0	0	0	0	0	0									65	0	0	0	0	0	0	0	0	0	0	0	0	0	0	0	0	0	0	0
	66	0	0	0	0	0	0	0	0	0	0	0	0	0	0	0	0	0	0	0	0									66	0	0	0	0	0	0	0	0	0	0	0	0	0	0	0	0	0	0	0
	67	0	0	0	0	0	0	0	0	0	0	0	0	0	0	0	0	0	0	0	0									67	0	0	0	0	0	0	0	0	0	0	0	0	0	0	0	0	0	0	0
	68	0	0	0	0	0	0	0	0	0	0	0	0	0	0	0	0	0	0	0	0									68	0	0	0	0	0	0	0	0	0	0	0	0	0	0	0	0	0	0	0
	69	0	0	0	0	0	0	0	0	0	0	0	0	0	0	0	0	0	0	0	0									69	0	0	0	0	0	0	0	0	0	0	0	0	0	0	0	0	0	0	0
	70	0	0	0	0	0	0	0	0	0	0	0	0	0	0	0	0	0	0	0	0									70	0	0	0	0	0	0	0	0	0	0	0	0	0	0	0	0	0	0	0
	71	0	0	0	0	0	0	0	0	0	0	0	0	0	0	0	0	0	0	0	0									71	0	0	0	0	0	0	0	0	0	0	0	0	0	0	0	0	0	0	0
	72	0	0	0	0	0	0	0	0	0	0	0	0	0	0	0	0	0	0	0	0									72	0	0	0	0	0	0	0	0	0	0	0	0	0	0	0	0	0	0	0
	73	0	0	0	0	0	0	0	0	0	0	0	0	0	0	0	0	0	0	0	0									73	0	0	0	0	0	0	0	0	0	0	0	0	0	0	0	0	0	0	0
	74	0	0	0	0	0	0	0	0	0	0	0	0	0	0	0	0	0	0	0	0									74	0	0	0	0	0	0	0	0	0	0	0	0	0	0	0	0	0	0	0
	75	0	0	0	0	0	0	0	0	0	0	0	0	0	0	0	0	0	0	0	0									75	0	0	0	0	0	0	0	0	0	0	0	0	0	0	0	0	0	0	0
	76	0	0	0	0	0	0	0	0	0	0	0	0	0	0	0	0	0	0	0	0									76	0	0	0	0	0	0	0	0	0	0	0	0	0	0	0	0	0	0	0
	77	0	0	0	0	0	0	0	0	0	0	0	0	0	0	0	0	0	0	0	0									77	0	0	0	0	0	0	0	0	0	0	0	0	0	0	0	0	0	0	0
	78	0	0	0	0	0	0	0	0	0	0	0	0	0	0	0	0	0	0	0	0									78	0	0	0	0	0	0	0	0	0	0	0	0	0	0	0	0	0	0	0
	79	0	0	0	0	0	0	0	0	0	0	0	0	0	0	0	0	0	0	0	0									79	0	0	0	0	0	0	0	0	0	0	0	0	0	0	0	0	0	0	0
	80	0	0	0	0	0	0	0	0	0	0	0	0	0	0	0	0	0	0	0	0									80	0	0	0	0	0	0	0	0	0	0	0	0	0	0	0	0	0	0	0
	81	0	0	0	0	0	0	0	0	0	0	0	0	0	0	0	0	0	0	0	0									81	0	0	0	0	0	0	0	0	0	0	0	0	0	0	0	0	0	0	0
	82	0	0	0	0	0	0	0	0	0	0	0	0	0	0	0	0	0	0	0	0									82	0	0	0	0	0	0	0	0	0	0	0	0	0	0	0	0	0	0	0
	83	0	0	0	0	0	0	0	0	0	0	0	0	0	0	0	0	0	0	0	0									83	0	0	0	0	0	0	0	0	0	0	0	0	0	0	0	0	0	0	0
	84	0	0	0	0	0	0	0	0	0	0	0	0	0	0	0	0	0	0	0	0									84	0	0	0	0	0	0	0	0	0	0	0	0	0	0	0	0	0	0	0
	85	0	0	0	0	0	0	0	0	0	0	0	0	0	0	0	0	0	0	0	0									85	0	0	0	0	0	0	0	0	0	0	0	0	0	0	0	0	0	0	0
	86	0	0	0	0	0	0	0	0	0	0	0	0	0	0	0	0	0	0	0	0									86	0	0	0	0	0	0	0	0	0	0	0	0	0	0	0	0	0	0	0
	87	0	0	0	0	0	0	0	0	0	0	0	0	0	0	0	0	0	0	0	0									87	0	0	0	0	0	0	0	0	0	0	0	0	0	0	0	0	0	0	0
	88	0	0	0	0	0	0	0	0	0	0	0	0	0	0	0	0	0	0	0	0									88	0	0	0	0	0	0	0	0	0	0	0	0	0	0	0	0	0	0	0
	89	0	0	0	0	0	0	0	0	0	0	0	0	0	0	0	0	0	0	0	0									89	0	0	0	0	0	0	0	0	0	0	0	0	0	0	0	0	0	0	0
	90	0	0	0	0	0	0	0	0	0	0	0	0	0	0	0	0	0	0	0	0									90	0	0	0	0	0	0	0	0	0	0	0	0	0	0	0	0	0	0	0
	91	0	0	0	0	0	0	0	0	0	0	0	0	0	0	0	0	0	0	0	0									91	0	0	0	0	0	0	0	0	0	0	0	0	0	0	0	0	0	0	0
	92	0	0	0	0	0	0	0	0	0	0	0	0	0	0	0	0	0	0	0	0									92	0	0	0	0	0	0	0	0	0	0	0	0	0	0	0	0	0	0	0
	93	0	0	0	0	0	0	0	0	0	0	0	0	0	0	0	0	0	0	0	0									93	0	0	0	0	0	0	0	0	0	0	0	0	0	0	0	0	0	0	0
	94	0	0	0	0	0	0	0	0	0	0	0	0	0	0	0	0	0	0	0	0									94	0	0	0	0	0	0	0	0	0	0	0	0	0	0	0	0	0	0	0
	95	0	0	0	0	0	0	0	0	0	0	0	0	0	0	0	0	0	0	0	0									95	0	0	0	0	0	0	0	0	0	0	0	0	0	0	0	0	0	0	0
	96	0	0	0	0	0	0	0	0	0	0	0	0	0	0	0	0	0	0	0	0									96	0	0	0	0	0	0	0	0	0	0	0	0	0	0	0	0	0	0	0
	97	0	0	0	0	0	0	0	0	0	0	0	0	0	0	0	0	0	0	0	0									97	0	0	0	0	0	0	0	0	0	0	0	0	0	0	0	0	0	0	0
	98	0	0	0	0	0	0	0	0	0	0	0	0	0	0	0	0	0	0	0	0									98	0	0	0	0	0	0	0	0	0	0	0	0	0	0	0	0	0	0	0
	99	0	0	0	0	0	0	0	0	0	0	0	0	0	0	0	0	0	0	0	0									99	0	0	0	0	0	0	0	0	0	0	0	0	0	0	0	0	0	0	0
	100	0	0	0	0	0	0	0	0	0	0	0	0	0	0	0	0	0	0	0	0									100	0	0	0	0	0	0	0	0	0	0	0	0	0	0	0	0	0	0	0
	101	0	0	0	0	0	0	0	0	0	0	0	0	0	0	0	0	0	0	0	0									101	0	0	0	0	0	0	0	0	0	0	0	0	0	0	0	0	0	0	0
	102	0	0	0	0	0	0	0	0	0	0	0	0	0	0	0	0	0	0	0	0									102	0	0	0	0	0	0	0	0	0	0	0	0	0	0	0	0	0	0	0
	103	0	0	0	0	0	0	0	0	0	0	0	0	0	0	0	0	0	0	0	0									103	0	0	0	0	0	0	0	0	0	0	0	0	0	0	0	0	0	0	0
	104	0	0	0	0	0	0	0	0	0	0	0	0	0	0	0	0	0	0	0	0									104	0	0	0	0	0	0	0	0	0	0	0	0	0	0	0	0	0	0	0
	105	0	0	0	0	0	0	0	0	0	0	0	0	0	0	0	0	0	0	0	0									105	0	0	0	0	0	0	0	0	0	0	0	0	0	0	0	0	0	0	0
	106	0	0	0	0	0	0	0	0	0	0	0	0	0	0	0	0	0	0	0	0									106	0	0	0	0	0	0	0	0	0	0	0	0	0	0	0	0	0	0	0
	107	0	0	0	0	0	0	0	0	0	0	0	0	0	0	0	0	0	0	0	0									107	0	0	0	0	0	0	0	0	0	0	0	0	0	0	0	0	0	0	0
	108	0	0	0	0	0	0	0	0	0	0	0	0	0	0	0	0	0	0	0	0									108	0	0	0	0	0	0	0	0	0	0	0	0	0	0	0	0	0	0	0
	109	0	0	0	0	0	0	0	0	0	0	0	0	0	0	0	0	0	0	0	0									109	0	0	0	0	0	0	0	0	0	0	0	0	0	0	0	0	0	0	0
	110	0	0	0	0	0	0	0	0	0	0	0	0	0	0	0	0	0	0	0	0									110	0	0	0	0	0	0	0	0	0	0	0	0	0	0	0	0	0	0	0
	111	0	0	0	0	0	0	0	0	0	0	0	0	0	0	0	0	0	0	0	0									111	0	0	0	0	0	0	0	0	0	0	0	0	0	0	0	0	0	0	0
	112	0	0	0	0	0	0	0	0	0	0	0	0	0	0	0	0	0	0	0	0									112	0	0	0	0	0	0	0	0	0	0	0	0	0	0	0	0	0	0	0
	113	0	0	0	0	0	0	0	0	0	0	0	0	0	0	0	0	0	0	0	0									113	0	0	0	0	0	0	0	0	0	0	0	0	0	0	0	0	0	0	0
	114	0	0	0	0	0	0	0	0	0	0	0	0	0	0	0	0	0	0	0	0									114	0	0	0	0	0	0	0	0	0	0	0	0	0	0	0	0	0	0	0
	115	0	0	0	0	0	0	0	0	0	0	0	0	0	0	0	0	0	0	0	0									115	0	0	0	0	0	0	0	0	0	0	0	0	0	0	0	0	0	0	0
	116	0	0	0	0	0	0	0	0	0	0	0	0	0	0	0	0	0	0	0	0									116	0	0	0	0	0	0	0	0	0	0	0	0	0	0	0	0	0	0	0
	117	0	0	0	0	0	0	0	0	0	0	0	0	0	0	0	0	0	0	0	0									117	0	0	0	0	0	0	0	0	0	0	0	0	0	0	0	0	0	0	0
	118	0	0	0	0	0	0	0	0	0	0	0	0	0	0	0	0	0	0	0	0									118	0	0	0	0	0	0	0	0	0	0	0	0	0	0	0	0	0	0	0
	119	0	0	0	0	0	0	0	0	0	0	0	0	0	0	0	0	0	0	0	0									119	0	0	0	0	0	0	0	0	0	0	0	0	0	0	0	0	0	0	0
	120	0	0	0	0	0	0	0	0	0	0	0	0	0	0	0	0	0	0	0	0									120	0	0	0	0	0	0	0	0	0	0	0	0	0	0	0	0	0	0	0
	121	0	0	0	0	0	0	0	0	0	0	0	0	0	0	0	0	0	0	0	0									121	0	0	0	0	0	0	0	0	0	0	0	0	0	0	0	0	0	0	0
	122	0	0	0	0	0	0	0	0	0	0	0	0	0	0	0	0	0	0	0	0									122	0	0	0	0	0	0	0	0	0	0	0	0	0	0	0	0	0	0	0
	123	0	0	0	0	0	0	0	0	0	0	0	0	0	0	0	0	0	0	0	0									123	0	0	0	0	0	0	0	0	0	0	0	0	0	0	0	0	0	0	0
	124	0	0	0	0	0	0	0	0	0	0	0	0	0	0	0	0	0	0	0	0									124	0	0	0	0	0	0	0	0	0	0	0	0	0	0	0	0	0	0	0
	125	0	0	0	0	0	0	0	0	0	0	0	0	0	0	0	0	0	0	0	0									125	0	0	0	0	0	0	0	0	0	0	0	0	0	0	0	0	0	0	0
	126	0	0	0	0	0	0	0	0	0	0	0	0	0	0	0	0	0	0	0	0									126	0	0	0	0	0	0	0	0	0	0	0	0	0	0	0	0	0	0	0
	127	0	0	0	0	0	0	0	0	0	0	0	0	0	0	0	0	0	0	0	0									127	0	0	0	0	0	0	0	0	0	0	0	0	0	0	0	0	0	0	0
	128	0	0	0	0	0	0	0	0	0	0	0	0	0	0	0	0	0	0	0	0									128	0	0	0	0	0	0	0	0	0	0	0	0	0	0	0	0	0	0	0
	129	0	0	0	0	0	0	0	0	0	0	0	0	0	0	0	0	0	0	0	0									129	0	0	0	0	0	0	0	0	0	0	0	0	0	0	0	0	0	0	0
	130	0	0	0	0	0	0	0	0	0	0	0	0	0	0	0	0	0	0	0	0									130	0	0	0	0	0	0	0	0	0	0	0	0	0	0	0	0	0	0	0
	131	0	0	0	0	0	0	0	0	0	0	0	0	0	0	0	0	0	0	0	0									131	0	0	0	0	0	0	0	0	0	0	0	0	0	0	0	0	0	0	0
	132	0	0	0	0	0	0	0	0	0	0	0	0	0	0	0	0	0	0	0	0									132	0	0	0	0	0	0	0	0	0	0	0	0	0	0	0	0	0	0	0
	133	0	0	0	0	0	0	0	0	0	0	0	0	0	0	0	0	0	0	0	0									133	0	0	0	0	0	0	0	0	0	0	0	0	0	0	0	0	0	0	0
	134	0	0	0	0	0	0	0	0	0	0	0	0	0	0	0	0	0	0	0	0									134	0	0	0	0	0	0	0	0	0	0	0	0	0	0	0	0	0	0	0
	135	0	0	0	0	0	0	0	0	0	0	0	0	0	0	0	0	0	0	0	0									135	0	0	0	0	0	0	0	0	0	0	0	0	0	0	0	0	0	0	0
	136	0	0	0	0	0	0	0	0	0	0	0	0	0	0	0	0	0	0	0	0									136	0	0	0	0	0	0	0	0	0	0	0	0	0	0	0	0	0	0	0
	137	0	0	0	0	0	0	0	0	0	0	0	0	0	0	0	0	0	0	0	0									137	0	0	0	0	0	0	0	0	0	0	0	0	0	0	0	0	0	0	0
	138	0	0	0	0	0	0	0	0	0	0	0	0	0	0	0	0	0	0	0	0									138	0	0	0	0	0	0	0	0	0	0	0	0	0	0	0	0	0	0	0
	139	0	0	0	0	0	0	0	0	0	0	0	0	0	0	0	0	0	0	0	0									139	0	0	0	0	0	0	0	0	0	0	0	0	0	0	0	0	0	0	0
	140	0	0	0	0	0	0	0	0	0	0	0	0	0	0	0	0	0	0	0	0									140	0	0	0	0	0	0	0	0	0	0	0	0	0	0	0	0	0	0	0
	141	0	0	0	0	0	0	0	0	0	0	0	0	0	0	0	0	0	0	0	0									141	0	0	0	0	0	0	0	0	0	0	0	0	0	0	0	0	0	0	0
	142	0	0	0	0	0	0	0	0	0	0	0	0	0	0	0	0	0	0	0	0									142	0	0	0	0	0	0	0	0	0	0	0	0	0	0	0	0	0	0	0
	143	0	0	0	0	0	0	0	0	0	0	0	0	0	0	0	0	0	0	0	0									143	0	0	0	0	0	0	0	0	0	0	0	0	0	0	0	0	0	0	0
	144	0	0	0	0	0	0	0	0	0	0	0	0	0	0	0	0	0	0	0	0									144	0	0	0	0	0	0	0	0	0	0	0	0	0	0	0	0	0	0	0
	145	0	0	0	0	0	0	0	0	0	0	0	0	0	0	0	0	0	0	0	0									145	0	0	0	0	0	0	0	0	0	0	0	0	0	0	0	0	0	0	0
	146	0	0	0	0	0	0	0	0	0	0	0	0	0	0	0	0	0	0	0	0									146	0	0	0	0	0	0	0	0	0	0	0	0	0	0	0	0	0	0	0
	147	0	0	0	0	0	0	0	0	0	0	0	0	0	0	0	0	0	0	0	0									147	0	0	0	0	0	0	0	0	0	0	0	0	0	0	0	0	0	0	0
	148	0	0	0	0	0	0	0	0	0	0	0	0	0	0	0	0	0	0	0	0									148	0	0	0	0	0	0	0	0	0	0	0	0	0	0	0	0	0	0	0
	149	0	0	0	0	0	0	0	0	0	0	0	0	0	0	0	0	0	0	0	0									149	0	0	0	0	0	0	0	0	0	0	0	0	0	0	0	0	0	0	0
	150	0	0	0	0	0	0	0	0	0	0	0	0	0	0	0	0	0	0	0	0									150	0	0	0	0	0	0	0	0	0	0	0	0	0	0	0	0	0	0	0
	151	0	0	0	0	0	0	0	0	0	0	0	0	0	0	0	0	0	0	0	0									151	0	0	0	0	0	0	0	0	0	0	0	0	0	0	0	0	0	0	0
	152	0	0	0	0	0	0	0	0	0	0	0	0	0	0	0	0	0	0	0	0									152	0	0	0	0	0	0	0	0	0	0	0	0	0	0	0	0	0	0	0
	153	0	0	0	0	0	0	0	0	0	0	0	0	0	0	0	0	0	0	0	0									153	0	0	0	0	0	0	0	0	0	0	0	0	0	0	0	0	0	0	0
	154	0	0	0	0	0	0	0	0	0	0	0	0	0	0	0	0	0	0	0	0									154	0	0	0	0	0	0	0	0	0	0	0	0	0	0	0	0	0	0	0
	155	0	0	0	0	0	0	0	0	0	0	0	0	0	0	0	0	0	0	0	0									155	0	0	0	0	0	0	0	0	0	0	0	0	0	0	0	0	0	0	0
	156	0	0	0	0	0	0	0	0	0	0	0	0	0	0	0	0	0	0	0	0									156	0	0	0	0	0	0	0	0	0	0	0	0	0	0	0	0	0	0	0
	157	0	0	0	0	0	0	0	0	0	0	0	0	0	0	0	0	0	0	0	0									157	0	0	0	0	0	0	0	0	0	0	0	0	0	0	0	0	0	0	0
	158	0	0	0	0	0	0	0	0	0	0	0	0	0	0	0	0	0	0	0	0									158	0	0	0	0	0	0	0	0	0	0	0	0	0	0	0	0	0	0	0
	159	0	0	0	0	0	0	0	0	0	0	0	0	0	0	0	0	0	0	0	0									159	0	0	0	0	0	0	0	0	0	0	0	0	0	0	0	0	0	0	0
	160	0	0	0	0	0	0	0	0	0	0	0	0	0	0	0	0	0	0	0	0									160	0	0	0	0	0	0	0	0	0	0	0	0	0	0	0	0	0	0	0
	161	0	0	0	0	0	0	0	0	0	0	0	0	0	0	0	0	0	0	0	0									161	0	0	0	0	0	0	0	0	0	0	0	0	0	0	0	0	0	0	0
	162	0	0	0	0	0	0	0	0	0	0	0	0	0	0	0	0	0	0	0	0									162	0	0	0	0	0	0	0	0	0	0	0	0	0	0	0	0	0	0	0
	163	0	0	0	0	0	0	0	0	0	0	0	0	0	0	0	0	0	0	0	0									163	0	0	0	0	0	0	0	0	0	0	0	0	0	0	0	0	0	0	0
	164	0	0	0	0	0	0	0	0	0	0	0	0	0	0	0	0	0	0	0	0									164	0	0	0	0	0	0	0	0	0	0	0	0	0	0	0	0	0	0	0
	165	0	0	0	0	0	0	0	0	0	0	0	0	0	0	0	0	0	0	0	0									165	0	0	0	0	0	0	0	0	0	0	0	0	0	0	0	0	0	0	0
	166	0	0	0	0	0	0	0	0	0	0	0	0	0	0	0	0	0	0	0	0									166	0	0	0	0	0	0	0	0	0	0	0	0	0	0	0	0	0	0	0
	167	0	0	0	0	0	0	0	0	0	0	0	0	0	0	0	0	0	0	0	0									167	0	0	0	0	0	0	0	0	0	0	0	0	0	0	0	0	0	0	0
	168	0	0	0	0	0	0	0	0	0	0	0	0	0	0	0	0	0	0	0	0									168	0	0	0	0	0	0	0	0	0	0	0	0	0	0	0	0	0	0	0
	169	0	0	0	0	0	0	0	0	0	0	0	0	0	0	0	0	0	0	0	0									169	0	0	0	0	0	0	0	0	0	0	0	0	0	0	0	0	0	0	0
	170	0	0	0	0	0	0	0	0	0	0	0	0	0	0	0	0	0	0	0	0									170	0	0	0	0	0	0	0	0	0	0	0	0	0	0	0	0	0	0	0
	171	0	0	0	0	0	0	0	0	0	0	0	0	0	0	0	0	0	0	0	0									171	0	0	0	0	0	0	0	0	0	0	0	0	0	0	0	0	0	0	0
	172	0	0	0	0	0	0	0	0	0	0	0	0	0	0	0	0	0	0	0	0									172	0	0	0	0	0	0	0	0	0	0	0	0	0	0	0	0	0	0	0
	173	0	0	0	0	0	0	0	0	0	0	0	0	0	0	0	0	0	0	0	0									173	0	0	0	0	0	0	0	0	0	0	0	0	0	0	0	0	0	0	0
	174	0	0	0	0	0	0	0	0	0	0	0	0	0	0	0	0	0	0	0	0									174	0	0	0	0	0	0	0	0	0	0	0	0	0	0	0	0	0	0	0
	175	0	0	0	0	0	0	0	0	0	0	0	0	0	0	0	0	0	0	0	0									175	0	0	0	0	0	0	0	0	0	0	0	0	0	0	0	0	0	0	0
	176	0	0	0	0	0	0	0	0	0	0	0	0	0	0	0	0	0	0	0	0									176	0	0	0	0	0	0	0	0	0	0	0	0	0	0	0	0	0	0	0
	177	0	0	0	0	0	0	0	0	0	0	0	0	0	0	0	0	0	0	0	0									177	0	0	0	0	0	0	0	0	0	0	0	0	0	0	0	0	0	0	0
	178	0	0	0	0	0	0	0	0	0	0	0	0	0	0	0	0	0	0	0	0									178	0	0	0	0	0	0	0	0	0	0	0	0	0	0	0	0	0	0	0
	179	0	0	0	0	0	0	0	0	0	0	0	0	0	0	0	0	0	0	0	0									179	0	0	0	0	0	0	0	0	0	0	0	0	0	0	0	0	0	0	0
	180	0	0	0	0	0	0	0	0	0	0	0	0	0	0	0	0	0	0	0	0									180	0	0	0	0	0	0	0	0	0	0	0	0	0	0	0	0	0	0	0
	181	0	0	0	0	0	0	0	0	0	0	0	0	0	0	0	0	0	0	0	0									181	0	0	0	0	0	0	0	0	0	0	0	0	0	0	0	0	0	0	0
	182	0	0	0	0	0	0	0	0	0	0	0	0	0	0	0	0	0	0	0	0									182	0	0	0	0	0	0	0	0	0	0	0	0	0	0	0	0	0	0	0
	183	0	0	0	0	0	0	0	0	0	0	0	0	0	0	0	0	0	0	0	0									183	0	0	0	0	0	0	0	0	0	0	0	0	0	0	0	0	0	0	0
	184	0	0	0	0	0	0	0	0	0	0	0	0	0	0	0	0	0	0	0	0									184	0	0	0	0	0	0	0	0	0	0	0	0	0	0	0	0	0	0	0
	185	0	0	0	0	0	0	0	0	0	0	0	0	0	0	0	0	0	0	0	0									185	0	0	0	0	0	0	0	0	0	0	0	0	0	0	0	0	0	0	0
	186	0	0	0	0	0	0	0	0	0	0	0	0	0	0	0	0	0	0	0	0									186	0	0	0	0	0	0	0	0	0	0	0	0	0	0	0	0	0	0	0
	187	0	0	0	0	0	0	0	0	0	0	0	0	0	0	0	0	0	0	0	0									187	0	0	0	0	0	0	0	0	0	0	0	0	0	0	0	0	0	0	0
	188	0	0	0	0	0	0	0	0	0	0	0	0	0	0	0	0	0	0	0	0									188	0	0	0	0	0	0	0	0	0	0	0	0	0	0	0	0	0	0	0
	189	0	0	0	0	0	0	0	0	0	0	0	0	0	0	0	0	0	0	0	0									189	0	0	0	0	0	0	0	0	0	0	0	0	0	0	0	0	0	0	0
	190	0	0	0	0	0	0	0	0	0	0	0	0	0	0	0	0	0	0	0	0									190	0	0	0	0	0	0	0	0	0	0	0	0	0	0	0	0	0	0	0
	191	0	0	0	0	0	0	0	0	0	0	0	0	0	0	0	0	0	0	0	0									191	0	0	0	0	0	0	0	0	0	0	0	0	0	0	0	0	0	0	0
	192	0	0	0	0	0	0	0	0	0	0	0	0	0	0	0	0	0	0	0	0									192	0	0	0	0	0	0	0	0	0	0	0	0	0	0	0	0	0	0	0
	193	0	0	0	0	0	0	0	0	0	0	0	0	0	0	0	0	0	0	0	0									193	0	0	0	0	0	0	0	0	0	0	0	0	0	0	0	0	0	0	0
	194	0	0	0	0	0	0	0	0	0	0	0	0	0	0	0	0	0	0	0	0									194	0	0	0	0	0	0	0	0	0	0	0	0	0	0	0	0	0	0	0
	195	0	0	0	0	0	0	0	0	0	0	0	0	0	0	0	0	0	0	0	0									195	0	0	0	0	0	0	0	0	0	0	0	0	0	0	0	0	0	0	0
	196	0	0	0	0	0	0	0	0	0	0	0	0	0	0	0	0	0	0	0	0									196	0	0	0	0	0	0	0	0	0	0	0	0	0	0	0	0	0	0	0
	197	0	0	0	0	0	0	0	0	0	0	0	0	0	0	0	0	0	0	0	0									197	0	0	0	0	0	0	0	0	0	0	0	0	0	0	0	0	0	0	0
	198	0	0	0	0	0	0	0	0	0	0	0	0	0	0	0	0	0	0	0	0									198	0	0	0	0	0	0	0	0	0	0	0	0	0	0	0	0	0	0	0
	199	0	0	0	0	0	0	0	0	0	0	0	0	0	0	0	0	0	0	0	0									199	0	0	0	0	0	0	0	0	0	0	0	0	0	0	0	0	0	0	0
	200	0	0	0	0	0	0	0	0	0	0	0	0	0	0	0	0	0	0	0	0									200	0	0	0	0	0	0	0	0	0	0	0	0	0	0	0	0	0	0	0
	201	0	0	0	0	0	0	0	0	0	0	0	0	0	0	0	0	0	0	0	0									201	0	0	0	0	0	0	0	0	0	0	0	0	0	0	0	0	0	0	0
	202	0	0	0	0	0	0	0	0	0	0	0	0	0	0	0	0	0	0	0	0									202	0	0	0	0	0	0	0	0	0	0	0	0	0	0	0	0	0	0	0
	203	0	0	0	0	0	0	0	0	0	0	0	0	0	0	0	0	0	0	0	0									203	0	0	0	0	0	0	0	0	0	0	0	0	0	0	0	0	0	0	0
	204	0	0	0	0	0	0	0	0	0	0	0	0	0	0	0	0	0	0	0	0									204	0	0	0	0	0	0	0	0	0	0	0	0	0	0	0	0	0	0	0
	205	0	0	0	0	0	0	0	0	0	0	0	0	0	0	0	0	0	0	0	0									205	0	0	0	0	0	0	0	0	0	0	0	0	0	0	0	0	0	0	0
	206	0	0	0	0	0	0	0	0	0	0	0	0	0	0	0	0	0	0	0	0									206	0	0	0	0	0	0	0	0	0	0	0	0	0	0	0	0	0	0	0
	207	0	0	0	0	0	0	0	0	0	0	0	0	0	0	0	0	0	0	0	0									207	0	0	0	0	0	0	0	0	0	0	0	0	0	0	0	0	0	0	0
	208	0	0	0	0	0	0	0	0	0	0	0	0	0	0	0	0	0	0	0	0									208	0	0	0	0	0	0	0	0	0	0	0	0	0	0	0	0	0	0	0
	209	0	0	0	0	0	0	0	0	0	0	0	0	0	0	0	0	0	0	0	0									209	0	0	0	0	0	0	0	0	0	0	0	0	0	0	0	0	0	0	0
	210	0	0	0	0	0	0	0	0	0	0	0	0	0	0	0	0	0	0	0	0									210	0	0	0	0	0	0	0	0	0	0	0	0	0	0	0	0	0	0	0
	211	0	0	0	0	0	0	0	0	0	0	0	0	0	0	0	0	0	0	0	0									211	0	0	0	0	0	0	0	0	0	0	0	0	0	0	0	0	0	0	0
	212	0	0	0	0	0	0	0	0	0	0	0	0	0	0	0	0	0	0	0	0									212	0	0	0	0	0	0	0	0	0	0	0	0	0	0	0	0	0	0	0
	213	0	0	0	0	0	0	0	0	0	0	0	0	0	0	0	0	0	0	0	0									213	0	0	0	0	0	0	0	0	0	0	0	0	0	0	0	0	0	0	0
	214	0	0	0	0	0	0	0	0	0	0	0	0	0	0	0	0	0	0	0	0									214	0	0	0	0	0	0	0	0	0	0	0	0	0	0	0	0	0	0	0
	215	0	0	0	0	0	0	0	0	0	0	0	0	0	0	0	0	0	0	0	0									215	0	0	0	0	0	0	0	0	0	0	0	0	0	0	0	0	0	0	0
	216	0	0	0	0	0	0	0	0	0	0	0	0	0	0	0	0	0	0	0	0									216	0	0	0	0	0	0	0	0	0	0	0	0	0	0	0	0	0	0	0
	217	0	0	0	0	0	0	0	0	0	0	0	0	0	0	0	0	0	0	0	0									217	0	0	0	0	0	0	0	0	0	0	0	0	0	0	0	0	0	0	0
	218	0	0	0	0	0	0	0	0	0	0	0	0	0	0	0	0	0	0	0	0									218	0	0	0	0	0	0	0	0	0	0	0	0	0	0	0	0	0	0	0
	219	0	0	0	0	0	0	0	0	0	0	0	0	0	0	0	0	0	0	0	0									219	0	0	0	0	0	0	0	0	0	0	0	0	0	0	0	0	0	0	0
	220	0	0	0	0	0	0	0	0	0	0	0	0	0	0	0	0	0	0	0	0									220	0	0	0	0	0	0	0	0	0	0	0	0	0	0	0	0	0	0	0
	221	0	0	0	0	0	0	0	0	0	0	0	0	0	0	0	0	0	0	0	0									221	0	0	0	0	0	0	0	0	0	0	0	0	0	0	0	0	0	0	0
	222	0	0	0	0	0	0	0	0	0	0	0	0	0	0	0	0	0	0	0	0									222	0	0	0	0	0	0	0	0	0	0	0	0	0	0	0	0	0	0	0
	223	0	0	0	0	0	0	0	0	0	0	0	0	0	0	0	0	0	0	0	0									223	0	0	0	0	0	0	0	0	0	0	0	0	0	0	0	0	0	0	0
	224	0	0	0	0	0	0	0	0	0	0	0	0	0	0	0	0	0	0	0	0									224	0	0	0	0	0	0	0	0	0	0	0	0	0	0	0	0	0	0	0
	225	0	0	0	0	0	0	0	0	0	0	0	0	0	0	0	0	0	0	0	0									225	0	0	0	0	0	0	0	0	0	0	0	0	0	0	0	0	0	0	0
	226	0	0	0	0	0	0	0	0	0	0	0	0	0	0	0	0	0	0	0	0									226	0	0	0	0	0	0	0	0	0	0	0	0	0	0	0	0	0	0	0
	227	0	0	0	0	0	0	0	0	0	0	0	0	0	0	0	0	0	0	0	0									227	0	0	0	0	0	0	0	0	0	0	0	0	0	0	0	0	0	0	0
	228	0	0	0	0	0	0	0	0	0	0	0	0	0	0	0	0	0	0	0	0									228	0	0	0	0	0	0	0	0	0	0	0	0	0	0	0	0	0	0	0
	229	0	0	0	0	0	0	0	0	0	0	0	0	0	0	0	0	0	0	0	0									229	0	0	0	0	0	0	0	0	0	0	0	0	0	0	0	0	0	0	0
	230	0	0	0	0	0	0	0	0	0	0	0	0	0	0	0	0	0	0	0	0									230	0	0	0	0	0	0	0	0	0	0	0	0	0	0	0	0	0	0	0
	231	0	0	0	0	0	0	0	0	0	0	0	0	0	0	0	0	0	0	0	0									231	0	0	0	0	0	0	0	0	0	0	0	0	0	0	0	0	0	0	0
	232	0	0	0	0	0	0	0	0	0	0	0	0	0	0	0	0	0	0	0	0									232	0	0	0	0	0	0	0	0	0	0	0	0	0	0	0	0	0	0	0
	233	0	0	0	0	0	0	0	0	0	0	0	0	0	0	0	0	0	0	0	0									233	0	0	0	0	0	0	0	0	0	0	0	0	0	0	0	0	0	0	0
	234	0	0	0	0	0	0	0	0	0	0	0	0	0	0	0	0	0	0	0	0									234	0	0	0	0	0	0	0	0	0	0	0	0	0	0	0	0	0	0	0
	235	0	0	0	0	0	0	0	0	0	0	0	0	0	0	0	0	0	0	0	0									235	0	0	0	0	0	0	0	0	0	0	0	0	0	0	0	0	0	0	0
	236	0	0	0	0	0	0	0	0	0	0	0	0	0	0	0	0	0	0	0	0									236	0	0	0	0	0	0	0	0	0	0	0	0	0	0	0	0	0	0	0
	237	0	0	0	0	0	0	0	0	0	0	0	0	0	0	0	0	0	0	0	0									237	0	0	0	0	0	0	0	0	0	0	0	0	0	0	0	0	0	0	0
	238	0	0	0	0	0	0	0	0	0	0	0	0	0	0	0	0	0	0	0	0									238	0	0	0	0	0	0	0	0	0	0	0	0	0	0	0	0	0	0	0
	239	0	0	0	0	0	0	0	0	0	0	0	0	0	0	0	0	0	0	0	0									239	0	0	0	0	0	0	0	0	0	0	0	0	0	0	0	0	0	0	0
	240	0	0	0	0	0	0	0	0	0	0	0	0	0	0	0	0	0	0	0	0									240	0	0	0	0	0	0	0	0	0	0	0	0	0	0	0	0	0	0	0
	241	0	0	0	0	0	0	0	0	0	0	0	0	0	0	0	0	0	0	0	0									241	0	0	0	0	0	0	0	0	0	0	0	0	0	0	0	0	0	0	0
	242	0	0	0	0	0	0	0	0	0	0	0	0	0	0	0	0	0	0	0	0									242	0	0	0	0	0	0	0	0	0	0	0	0	0	0	0	0	0	0	0
	243	0	0	0	0	0	0	0	0	0	0	0	0	0	0	0	0	0	0	0	0									243	0	0	0	0	0	0	0	0	0	0	0	0	0	0	0	0	0	0	0
	244	0	0	0	0	0	0	0	0	0	0	0	0	0	0	0	0	0	0	0	0									244	0	0	0	0	0	0	0	0	0	0	0	0	0	0	0	0	0	0	0
	245	0	0	0	0	0	0	0	0	0	0	0	0	0	0	0	0	0	0	0	0									245	0	0	0	0	0	0	0	0	0	0	0	0	0	0	0	0	0	0	0
	246	0	0	0	0	0	0	0	0	0	0	0	0	0	0	0	0	0	0	0	0									246	0	0	0	0	0	0	0	0	0	0	0	0	0	0	0	0	0	0	0
	247	0	0	0	0	0	0	0	0	0	0	0	0	0	0	0	0	0	0	0	0									247	0	0	0	0	0	0	0	0	0	0	0	0	0	0	0	0	0	0	0
	248	0	0	0	0	0	0	0	0	0	0	0	0	0	0	0	0	0	0	0	0									248	0	0	0	0	0	0	0	0	0	0	0	0	0	0	0	0	0	0	0
	249	0	0	0	0	0	0	0	0	0	0	0	0	0	0	0	0	0	0	0	0									249	0	0	0	0	0	0	0	0	0	0	0	0	0	0	0	0	0	0	0
	250	0	0	0	0	0	0	0	0	0	0	0	0	0	0	0	0	0	0	0	0									250	0	0	0	0	0	0	0	0	0	0	0	0	0	0	0	0	0	0	0
	251	0	0	0	0	0	0	0	0	0	0	0	0	0	0	0	0	0	0	0	0									251	0	0	0	0	0	0	0	0	0	0	0	0	0	0	0	0	0	0	0
	252	0	0	0	0	0	0	0	0	0	0	0	0	0	0	0	0	0	0	0	0									252	0	0	0	0	0	0	0	0	0	0	0	0	0	0	0	0	0	0	0
	253	0	0	0	0	0	0	0	0	0	0	0	0	0	0	0	0	0	0	0	0									253	0	0	0	0	0	0	0	0	0	0	0	0	0	0	0	0	0	0	0
	254	0	0	0	0	0	0	0	0	0	0	0	0	0	0	0	0	0	0	0	0									254	0	0	0	0	0	0	0	0	0	0	0	0	0	0	0	0	0	0	0
	255	0	0	0	0	0	0	0	0	0	0	0	0	0	0	0	0	0	0	0	0									255	0	0	0	0	0	0	0	0	0	0	0	0	0	0	0	0	0	0	0
	256	0	0	0	0	0	0	0	0	0	0	0	0	0	0	0	0	0	0	0	0									256	0	0	0	0	0	0	0	0	0	0	0	0	0	0	0	0	0	0	0
	257	0	0	0	0	0	0	0	0	0	0	0	0	0	0	0	0	0	0	0	0									257	0	0	0	0	0	0	0	0	0	0	0	0	0	0	0	0	0	0	0
	258	0	0	0	0	0	0	0	0	0	0	0	0	0	0	0	0	0	0	0	0									258	0	0	0	0	0	0	0	0	0	0	0	0	0	0	0	0	0	0	0
	259	0	0	0	0	0	0	0	0	0	0	0	0	0	0	0	0	0	0	0	0									259	0	0	0	0	0	0	0	0	0	0	0	0	0	0	0	0	0	0	0
	260	0	0	0	0	0	0	0	0	0	0	0	0	0	0	0	0	0	0	0	0									260	0	0	0	0	0	0	0	0	0	0	0	0	0	0	0	0	0	0	0
	261	0	0	0	0	0	0	0	0	0	0	0	0	0	0	0	0	0	0	0	0									261	0	0	0	0	0	0	0	0	0	0	0	0	0	0	0	0	0	0	0
	262	0	0	0	0	0	0	0	0	0	0	0	0	0	0	0	0	0	0	0	0									262	0	0	0	0	0	0	0	0	0	0	0	0	0	0	0	0	0	0	0
	263	0	0	0	0	0	0	0	0	0	0	0	0	0	0	0	0	0	0	0	0									263	0	0	0	0	0	0	0	0	0	0	0	0	0	0	0	0	0	0	0
	264	0	0	0	0	0	0	0	0	0	0	0	0	0	0	0	0	0	0	0	0									264	0	0	0	0	0	0	0	0	0	0	0	0	0	0	0	0	0	0	0
	265	0	0	0	0	0	0	0	0	0	0	0	0	0	0	0	0	0	0	0	0									265	0	0	0	0	0	0	0	0	0	0	0	0	0	0	0	0	0	0	0
	266	0	0	0	0	0	0	0	0	0	0	0	0	0	0	0	0	0	0	0	0									266	0	0	0	0	0	0	0	0	0	0	0	0	0	0	0	0	0	0	0
	267	0	0	0	0	0	0	0	0	0	0	0	0	0	0	0	0	0	0	0	0									267	0	0	0	0	0	0	0	0	0	0	0	0	0	0	0	0	0	0	0
	268	0	0	0	0	0	0	0	0	0	0	0	0	0	0	0	0	0	0	0	0									268	0	0	0	0	0	0	0	0	0	0	0	0	0	0	0	0	0	0	0
	269	0	0	0	0	0	0	0	0	0	0	0	0	0	0	0	0	0	0	0	0									269	0	0	0	0	0	0	0	0	0	0	0	0	0	0	0	0	0	0	0
	270	0	0	0	0	0	0	0	0	0	0	0	0	0	0	0	0	0	0	0	0									270	0	0	0	0	0	0	0	0	0	0	0	0	0	0	0	0	0	0	0
	271	0	0	0	0	0	0	0	0	0	0	0	0	0	0	0	0	0	0	0	0									271	0	0	0	0	0	0	0	0	0	0	0	0	0	0	0	0	0	0	0
	272	0	0	0	0	0	0	0	0	0	0	0	0	0	0	0	0	0	0	0	0									272	0	0	0	0	0	0	0	0	0	0	0	0	0	0	0	0	0	0	0
	273	0	0	0	0	0	0	0	0	0	0	0	0	0	0	0	0	0	0	0	0									273	0	0	0	0	0	0	0	0	0	0	0	0	0	0	0	0	0	0	0
	274	0	0	0	0	0	0	0	0	0	0	0	0	0	0	0	0	0	0	0	0									274	0	0	0	0	0	0	0	0	0	0	0	0	0	0	0	0	0	0	0
	275	0	0	0	0	0	0	0	0	0	0	0	0	0	0	0	0	0	0	0	0									275	0	0	0	0	0	0	0	0	0	0	0	0	0	0	0	0	0	0	0
	276	0	0	0	0	0	0	0	0	0	0	0	0	0	0	0	0	0	0	0	0									276	0	0	0	0	0	0	0	0	0	0	0	0	0	0	0	0	0	0	0
	277	0	0	0	0	0	0	0	0	0	0	0	0	0	0	0	0	0	0	0	0									277	0	0	0	0	0	0	0	0	0	0	0	0	0	0	0	0	0	0	0
	278	0	0	0	0	0	0	0	0	0	0	0	0	0	0	0	0	0	0	0	0									278	0	0	0	0	0	0	0	0	0	0	0	0	0	0	0	0	0	0	0
	279	0	0	0	0	0	0	0	0	0	0	0	0	0	0	0	0	0	0	0	0									279	0	0	0	0	0	0	0	0	0	0	0	0	0	0	0	0	0	0	0
	280	0	0	0	0	0	0	0	0	0	0	0	0	0	0	0	0	0	0	0	0									280	0	0	0	0	0	0	0	0	0	0	0	0	0	0	0	0	0	0	0
	281	0	0	0	0	0	0	0	0	0	0	0	0	0	0	0	0	0	0	0	0									281	0	0	0	0	0	0	0	0	0	0	0	0	0	0	0	0	0	0	0
	282	0	0	0	0	0	0	0	0	0	0	0	0	0	0	0	0	0	0	0	0									282	0	0	0	0	0	0	0	0	0	0	0	0	0	0	0	0	0	0	0
	283	0	0	0	0	0	0	0	0	0	0	0	0	0	0	0	0	0	0	0	0									283	0	0	0	0	0	0	0	0	0	0	0	0	0	0	0	0	0	0	0
	284	0	0	0	0	0	0	0	0	0	0	0	0	0	0	0	0	0	0	0	0									284	0	0	0	0	0	0	0	0	0	0	0	0	0	0	0	0	0	0	0
	285	0	0	0	0	0	0	0	0	0	0	0	0	0	0	0	0	0	0	0	0									285	0	0	0	0	0	0	0	0	0	0	0	0	0	0	0	0	0	0	0
	286	0	0	0	0	0	0	0	0	0	0	0	0	0	0	0	0	0	0	0	0									286	0	0	0	0	0	0	0	0	0	0	0	0	0	0	0	0	0	0	0
	287	0	0	0	0	0	0	0	0	0	0	0	0	0	0	0	0	0	0	0	0									287	0	0	0	0	0	0	0	0	0	0	0	0	0	0	0	0	0	0	0
	288	0	0	0	0	0	0	0	0	0	0	0	0	0	0	0	0	0	0	0	0									288	0	0	0	0	0	0	0	0	0	0	0	0	0	0	0	0	0	0	0
	289	0	0	0	0	0	0	0	0	0	0	0	0	0	0	0	0	0	0	0	0									289	0	0	0	0	0	0	0	0	0	0	0	0	0	0	0	0	0	0	0
	290	0	0	0	0	0	0	0	0	0	0	0	0	0	0	0	0	0	0	0	0									290	0	0	0	0	0	0	0	0	0	0	0	0	0	0	0	0	0	0	0
	291	0	0	0	0	0	0	0	0	0	0	0	0	0	0	0	0	0	0	0	0									291	0	0	0	0	0	0	0	0	0	0	0	0	0	0	0	0	0	0	0
	292	0	0	0	0	0	0	0	0	0	0	0	0	0	0	0	0	0	0	0	0									292	0	0	0	0	0	0	0	0	0	0	0	0	0	0	0	0	0	0	0
	293	0	0	0	0	0	0	0	0	0	0	0	0	0	0	0	0	0	0	0	0									293	0	0	0	0	0	0	0	0	0	0	0	0	0	0	0	0	0	0	0
	294	0	0	0	0	0	0	0	0	0	0	0	0	0	0	0	0	0	0	0	0									294	0	0	0	0	0	0	0	0	0	0	0	0	0	0	0	0	0	0	0
	295	0	0	0	0	0	0	0	0	0	0	0	0	0	0	0	0	0	0	0	0									295	0	0	0	0	0	0	0	0	0	0	0	0	0	0	0	0	0	0	0
	296	0	0	0	0	0	0	0	0	0	0	0	0	0	0	0	0	0	0	0	0									296	0	0	0	0	0	0	0	0	0	0	0	0	0	0	0	0	0	0	0
	297	0	0	0	0	0	0	0	0	0	0	0	0	0	0	0	0	0	0	0	0									297	0	0	0	0	0	0	0	0	0	0	0	0	0	0	0	0	0	0	0
	298	0	0	0	0	0	0	0	0	0	0	0	0	0	0	0	0	0	0	0	0									298	0	0	0	0	0	0	0	0	0	0	0	0	0	0	0	0	0	0	0
	299	0	0	0	0	0	0	0	0	0	0	0	0	0	0	0	0	0	0	0	0									299	0	0	0	0	0	0	0	0	0	0	0	0	0	0	0	0	0	0	0
	300	0	0	0	0	0	0	0	0	0	0	0	0	0	0	0	0	0	0	0	0									300	0	0	0	0	0	0	0	0	0	0	0	0	0	0	0	0	0	0	0
	301	0	0	0	0	0	0	0	0	0	0	0	0	0	0	0	0	0	0	0	0									301	0	0	0	0	0	0	0	0	0	0	0	0	0	0	0	0	0	0	0
	302	0	0	0	0	0	0	0	0	0	0	0	0	0	0	0	0	0	0	0	0									302	0	0	0	0	0	0	0	0	0	0	0	0	0	0	0	0	0	0	0
	303	0	0	0	0	0	0	0	0	0	0	0	0	0	0	0	0	0	0	0	0									303	0	0	0	0	0	0	0	0	0	0	0	0	0	0	0	0	0	0	0
	304	0	0	0	0	0	0	0	0	0	0	0	0	0	0	0	0	0	0	0	0									304	0	0	0	0	0	0	0	0	0	0	0	0	0	0	0	0	0	0	0
	305	0	0	0	0	0	0	0	0	0	0	0	0	0	0	0	0	0	0	0	0									305	0	0	0	0	0	0	0	0	0	0	0	0	0	0	0	0	0	0	0
	306	0	0	0	0	0	0	0	0	0	0	0	0	0	0	0	0	0	0	0	0									306	0	0	0	0	0	0	0	0	0	0	0	0	0	0	0	0	0	0	0
	307	0	0	0	0	0	0	0	0	0	0	0	0	0	0	0	0	0	0	0	0									307	0	0	0	0	0	0	0	0	0	0	0	0	0	0	0	0	0	0	0
	308	0	0	0	0	0	0	0	0	0	0	0	0	0	0	0	0	0	0	0	0									308	0	0	0	0	0	0	0	0	0	0	0	0	0	0	0	0	0	0	0
	309	0	0	0	0	0	0	0	0	0	0	0	0	0	0	0	0	0	0	0	0									309	0	0	0	0	0	0	0	0	0	0	0	0	0	0	0	0	0	0	0
	310	0	0	0	0	0	0	0	0	0	0	0	0	0	0	0	0	0	0	0	0									310	0	0	0	0	0	0	0	0	0	0	0	0	0	0	0	0	0	0	0
	311	0	0	0	0	0	0	0	0	0	0	0	0	0	0	0	0	0	0	0	0									311	0	0	0	0	0	0	0	0	0	0	0	0	0	0	0	0	0	0	0
	312	0	0	0	0	0	0	0	0	0	0	0	0	0	0	0	0	0	0	0	0									312	0	0	0	0	0	0	0	0	0	0	0	0	0	0	0	0	0	0	0
	313	0	0	0	0	0	0	0	0	0	0	0	0	0	0	0	0	0	0	0	0									313	0	0	0	0	0	0	0	0	0	0	0	0	0	0	0	0	0	0	0
	314	0	0	0	0	0	0	0	0	0	0	0	0	0	0	0	0	0	0	0	0									314	0	0	0	0	0	0	0	0	0	0	0	0	0	0	0	0	0	0	0
	315	0	0	0	0	0	0	0	0	0	0	0	0	0	0	0	0	0	0	0	0									315	0	0	0	0	0	0	0	0	0	0	0	0	0	0	0	0	0	0	0
	316	0	0	0	0	0	0	0	0	0	0	0	0	0	0	0	0	0	0	0	0									316	0	0	0	0	0	0	0	0	0	0	0	0	0	0	0	0	0	0	0
	317	0	0	0	0	0	0	0	0	0	0	0	0	0	0	0	0	0	0	0	0									317	0	0	0	0	0	0	0	0	0	0	0	0	0	0	0	0	0	0	0
	318	0	0	0	0	0	0	0	0	0	0	0	0	0	0	0	0	0	0	0	0									318	0	0	0	0	0	0	0	0	0	0	0	0	0	0	0	0	0	0	0
	319	0	0	0	0	0	0	0	0	0	0	0	0	0	0	0	0	0	0	0	0									319	0	0	0	0	0	0	0	0	0	0	0	0	0	0	0	0	0	0	0
	320	0	0	0	0	0	0	0	0	0	0	0	0	0	0	0	0	0	0	0	0									320	0	0	0	0	0	0	0	0	0	0	0	0	0	0	0	0	0	0	0
	321	0	0	0	0	0	0	0	0	0	0	0	0	0	0	0	0	0	0	0	0									321	0	0	0	0	0	0	0	0	0	0	0	0	0	0	0	0	0	0	0
	322	0	0	0	0	0	0	0	0	0	0	0	0	0	0	0	0	0	0	0	0									322	0	0	0	0	0	0	0	0	0	0	0	0	0	0	0	0	0	0	0
	323	0	0	0	0	0	0	0	0	0	0	0	0	0	0	0	0	0	0	0	0									323	0	0	0	0	0	0	0	0	0	0	0	0	0	0	0	0	0	0	0
	324	0	0	0	0	0	0	0	0	0	0	0	0	0	0	0	0	0	0	0	0									324	0	0	0	0	0	0	0	0	0	0	0	0	0	0	0	0	0	0	0
	325	0	0	0	0	0	0	0	0	0	0	0	0	0	0	0	0	0	0	0	0									325	0	0	0	0	0	0	0	0	0	0	0	0	0	0	0	0	0	0	0
	326	0	0	0	0	0	0	0	0	0	0	0	0	0	0	0	0	0	0	0	0									326	0	0	0	0	0	0	0	0	0	0	0	0	0	0	0	0	0	0	0
	327	0	0	0	0	0	0	0	0	0	0	0	0	0	0	0	0	0	0	0	0									327	0	0	0	0	0	0	0	0	0	0	0	0	0	0	0	0	0	0	0
	328	0	0	0	0	0	0	0	0	0	0	0	0	0	0	0	0	0	0	0	0									328	0	0	0	0	0	0	0	0	0	0	0	0	0	0	0	0	0	0	0
	329	0	0	0	0	0	0	0	0	0	0	0	0	0	0	0	0	0	0	0	0									329	0	0	0	0	0	0	0	0	0	0	0	0	0	0	0	0	0	0	0
	330	0	0	0	0	0	0	0	0	0	0	0	0	0	0	0	0	0	0	0	0									330	0	0	0	0	0	0	0	0	0	0	0	0	0	0	0	0	0	0	0
	331	0	0	0	0	0	0	0	0	0	0	0	0	0	0	0	0	0	0	0	0									331	0	0	0	0	0	0	0	0	0	0	0	0	0	0	0	0	0	0	0
	332	0	0	0	0	0	0	0	0	0	0	0	0	0	0	0	0	0	0	0	0									332	0	0	0	0	0	0	0	0	0	0	0	0	0	0	0	0	0	0	0
	333	0	0	0	0	0	0	0	0	0	0	0	0	0	0	0	0	0	0	0	0									333	0	0	0	0	0	0	0	0	0	0	0	0	0	0	0	0	0	0	0
	334	0	0	0	0	0	0	0	0	0	0	0	0	0	0	0	0	0	0	0	0									334	0	0	0	0	0	0	0	0	0	0	0	0	0	0	0	0	0	0	0
	335	0	0	0	0	0	0	0	0	0	0	0	0	0	0	0	0	0	0	0	0									335	0	0	0	0	0	0	0	0	0	0	0	0	0	0	0	0	0	0	0
	336	0	0	0	0	0	0	0	0	0	0	0	0	0	0	0	0	0	0	0	0									336	0	0	0	0	0	0	0	0	0	0	0	0	0	0	0	0	0	0	0
	337	0	0	0	0	0	0	0	0	0	0	0	0	0	0	0	0	0	0	0	0									337	0	0	0	0	0	0	0	0	0	0	0	0	0	0	0	0	0	0	0
	338	0	0	0	0	0	0	0	0	0	0	0	0	0	0	0	0	0	0	0	0									338	0	0	0	0	0	0	0	0	0	0	0	0	0	0	0	0	0	0	0
	339	0	0	0	0	0	0	0	0	0	0	0	0	0	0	0	0	0	0	0	0									339	0	0	0	0	0	0	0	0	0	0	0	0	0	0	0	0	0	0	0
	340	0	0	0	0	0	0	0	0	0	0	0	0	0	0	0	0	0	0	0	0									340	0	0	0	0	0	0	0	0	0	0	0	0	0	0	0	0	0	0	0
	341	0	0	0	0	0	0	0	0	0	0	0	0	0	0	0	0	0	0	0	0									341	0	0	0	0	0	0	0	0	0	0	0	0	0	0	0	0	0	0	0
	342	0	0	0	0	0	0	0	0	0	0	0	0	0	0	0	0	0	0	0	0									342	0	0	0	0	0	0	0	0	0	0	0	0	0	0	0	0	0	0	0
	343	0	0	0	0	0	0	0	0	0	0	0	0	0	0	0	0	0	0	0	0									343	0	0	0	0	0	0	0	0	0	0	0	0	0	0	0	0	0	0	0
	344	0	0	0	0	0	0	0	0	0	0	0	0	0	0	0	0	0	0	0	0									344	0	0	0	0	0	0	0	0	0	0	0	0	0	0	0	0	0	0	0
	345	0	0	0	0	0	0	0	0	0	0	0	0	0	0	0	0	0	0	0	0									345	0	0	0	0	0	0	0	0	0	0	0	0	0	0	0	0	0	0	0
	346	0	0	0	0	0	0	0	0	0	0	0	0	0	0	0	0	0	0	0	0									346	0	0	0	0	0	0	0	0	0	0	0	0	0	0	0	0	0	0	0
	347	0	0	0	0	0	0	0	0	0	0	0	0	0	0	0	0	0	0	0	0									347	0	0	0	0	0	0	0	0	0	0	0	0	0	0	0	0	0	0	0
	348	0	0	0	0	0	0	0	0	0	0	0	0	0	0	0	0	0	0	0	0									348	0	0	0	0	0	0	0	0	0	0	0	0	0	0	0	0	0	0	0
	349	0	0	0	0	0	0	0	0	0	0	0	0	0	0	0	0	0	0	0	0									349	0	0	0	0	0	0	0	0	0	0	0	0	0	0	0	0	0	0	0
	350	0	0	0	0	0	0	0	0	0	0	0	0	0	0	0	0	0	0	0	0									350	0	0	0	0	0	0	0	0	0	0	0	0	0	0	0	0	0	0	0
	351	0	0	0	0	0	0	0	0	0	0	0	0	0	0	0	0	0	0	0	0									351	0	0	0	0	0	0	0	0	0	0	0	0	0	0	0	0	0	0	0
	352	0	0	0	0	0	0	0	0	0	0	0	0	0	0	0	0	0	0	0	0									352	0	0	0	0	0	0	0	0	0	0	0	0	0	0	0	0	0	0	0
	353	0	0	0	0	0	0	0	0	0	0	0	0	0	0	0	0	0	0	0	0									353	0	0	0	0	0	0	0	0	0	0	0	0	0	0	0	0	0	0	0
	354	0	0	0	0	0	0	0	0	0	0	0	0	0	0	0	0	0	0	0	0									354	0	0	0	0	0	0	0	0	0	0	0	0	0	0	0	0	0	0	0
	355	0	0	0	0	0	0	0	0	0	0	0	0	0	0	0	0	0	0	0	0									355	0	0	0	0	0	0	0	0	0	0	0	0	0	0	0	0	0	0	0
	356	0	0	0	0	0	0	0	0	0	0	0	0	0	0	0	0	0	0	0	0									356	0	0	0	0	0	0	0	0	0	0	0	0	0	0	0	0	0	0	0
	357	0	0	0	0	0	0	0	0	0	0	0	0	0	0	0	0	0	0	0	0									357	0	0	0	0	0	0	0	0	0	0	0	0	0	0	0	0	0	0	0
	358	0	0	0	0	0	0	0	0	0	0	0	0	0	0	0	0	0	0	0	0									358	0	0	0	0	0	0	0	0	0	0	0	0	0	0	0	0	0	0	0
	359	0	0	0	0	0	0	0	0	0	0	0	0	0	0	0	0	0	0	0	0									359	0	0	0	0	0	0	0	0	0	0	0	0	0	0	0	0	0	0	0
	360	0	0	0	0	0	0	0	0	0	0	0	0	0	0	0	0	0	0	0	0									360	0	0	0	0	0	0	0	0	0	0	0	0	0	0	0	0	0	0	0
	361	0	0	0	0	0	0	0	0	0	0	0	0	0	0	0	0	0	0	0	0									361	0	0	0	0	0	0	0	0	0	0	0	0	0	0	0	0	0	0	0
	362	0	0	0	0	0	0	0	0	0	0	0	0	0	0	0	0	0	0	0	0									362	0	0	0	0	0	0	0	0	0	0	0	0	0	0	0	0	0	0	0
	363	0	0	0	0	0	0	0	0	0	0	0	0	0	0	0	0	0	0	0	0									363	0	0	0	0	0	0	0	0	0	0	0	0	0	0	0	0	0	0	0
	364	0	0	0	0	0	0	0	0	0	0	0	0	0	0	0	0	0	0	0	0									364	0	0	0	0	0	0	0	0	0	0	0	0	0	0	0	0	0	0	0
	365	0	0	0	0	0	0	0	0	0	0	0	0	0	0	0	0	0	0	0	0									365	0	0	0	0	0	0	0	0	0	0	0	0	0	0	0	0	0	0	0
	366	0	0	0	0	0	0	0	0	0	0	0	0	0	0	0	0	0	0	0	0									366	0	0	0	0	0	0	0	0	0	0	0	0	0	0	0	0	0	0	0
	367	0	0	0	0	0	0	0	0	0	0	0	0	0	0	0	0	0	0	0	0									367	0	0	0	0	0	0	0	0	0	0	0	0	0	0	0	0	0	0	0
	368	0	0	0	0	0	0	0	0	0	0	0	0	0	0	0	0	0	0	0	0									368	0	0	0	0	0	0	0	0	0	0	0	0	0	0	0	0	0	0	0
	369	0	0	0	0	0	0	0	0	0	0	0	0	0	0	0	0	0	0	0	0									369	0	0	0	0	0	0	0	0	0	0	0	0	0	0	0	0	0	0	0
	370	0	0	0	0	0	0	0	0	0	0	0	0	0	0	0	0	0	0	0	0									370	0	0	0	0	0	0	0	0	0	0	0	0	0	0	0	0	0	0	0
	371	0	0	0	0	0	0	0	0	0	0	0	0	0	0	0	0	0	0	0	0									371	0	0	0	0	0	0	0	0	0	0	0	0	0	0	0	0	0	0	0
	372	0	0	0	0	0	0	0	0	0	0	0	0	0	0	0	0	0	0	0	0									372	0	0	0	0	0	0	0	0	0	0	0	0	0	0	0	0	0	0	0
	373	0	0	0	0	0	0	0	0	0	0	0	0	0	0	0	0	0	0	0	0									373	0	0	0	0	0	0	0	0	0	0	0	0	0	0	0	0	0	0	0
	374	0	0	0	0	0	0	0	0	0	0	0	0	0	0	0	0	0	0	0	0									374	0	0	0	0	0	0	0	0	0	0	0	0	0	0	0	0	0	0	0
	375	0	0	0	0	0	0	0	0	0	0	0	0	0	0	0	0	0	0	0	0									375	0	0	0	0	0	0	0	0	0	0	0	0	0	0	0	0	0	0	0
	376	0	0	0	0	0	0	0	0	0	0	0	0	0	0	0	0	0	0	0	0									376	0	0	0	0	0	0	0	0	0	0	0	0	0	0	0	0	0	0	0
	377	0	0	0	0	0	0	0	0	0	0	0	0	0	0	0	0	0	0	0	0									377	0	0	0	0	0	0	0	0	0	0	0	0	0	0	0	0	0	0	0
	378	0	0	0	0	0	0	0	0	0	0	0	0	0	0	0	0	0	0	0	0									378	0	0	0	0	0	0	0	0	0	0	0	0	0	0	0	0	0	0	0
	379	0	0	0	0	0	0	0	0	0	0	0	0	0	0	0	0	0	0	0	0									379	0	0	0	0	0	0	0	0	0	0	0	0	0	0	0	0	0	0	0
	380	0	0	0	0	0	0	0	0	0	0	0	0	0	0	0	0	0	0	0	0									380	0	0	0	0	0	0	0	0	0	0	0	0	0	0	0	0	0	0	0
	381	0	0	0	0	0	0	0	0	0	0	0	0	0	0	0	0	0	0	0	0									381	0	0	0	0	0	0	0	0	0	0	0	0	0	0	0	0	0	0	0
	382	0	0	0	0	0	0	0	0	0	0	0	0	0	0	0	0	0	0	0	0									382	0	0	0	0	0	0	0	0	0	0	0	0	0	0	0	0	0	0	0
	383	0	0	0	0	0	0	0	0	0	0	0	0	0	0	0	0	0	0	0	0									383	0	0	0	0	0	0	0	0	0	0	0	0	0	0	0	0	0	0	0
	384	0	0	0	0	0	0	0	0	0	0	0	0	0	0	0	0	0	0	0	0									384	0	0	0	0	0	0	0	0	0	0	0	0	0	0	0	0	0	0	0
	385	0	0	0	0	0	0	0	0	0	0	0	0	0	0	0	0	0	0	0	0									385	0	0	0	0	0	0	0	0	0	0	0	0	0	0	0	0	0	0	0
	386	0	0	0	0	0	0	0	0	0	0	0	0	0	0	0	0	0	0	0	0									386	0	0	0	0	0	0	0	0	0	0	0	0	0	0	0	0	0	0	0
	387	0	0	0	0	0	0	0	0	0	0	0	0	0	0	0	0	0	0	0	0									387	0	0	0	0	0	0	0	0	0	0	0	0	0	0	0	0	0	0	0
	388	0	0	0	0	0	0	0	0	0	0	0	0	0	0	0	0	0	0	0	0									388	0	0	0	0	0	0	0	0	0	0	0	0	0	0	0	0	0	0	0
	389	0	0	0	0	0	0	0	0	0	0	0	0	0	0	0	0	0	0	0	0									389	0	0	0	0	0	0	0	0	0	0	0	0	0	0	0	0	0	0	0
	390	0	0	0	0	0	0	0	0	0	0	0	0	0	0	0	0	0	0	0	0									390	0	0	0	0	0	0	0	0	0	0	0	0	0	0	0	0	0	0	0
	391	0	0	0	0	0	0	0	0	0	0	0	0	0	0	0	0	0	0	0	0									391	0	0	0	0	0	0	0	0	0	0	0	0	0	0	0	0	0	0	0
	392	0	0	0	0	0	0	0	0	0	0	0	0	0	0	0	0	0	0	0	0									392	0	0	0	0	0	0	0	0	0	0	0	0	0	0	0	0	0	0	0
	393	0	0	0	0	0	0	0	0	0	0	0	0	0	0	0	0	0	0	0	0									393	0	0	0	0	0	0	0	0	0	0	0	0	0	0	0	0	0	0	0
	394	0	0	0	0	0	0	0	0	0	0	0	0	0	0	0	0	0	0	0	0									394	0	0	0	0	0	0	0	0	0	0	0	0	0	0	0	0	0	0	0
	395	0	0	0	0	0	0	0	0	0	0	0	0	0	0	0	0	0	0	0	0									395	0	0	0	0	0	0	0	0	0	0	0	0	0	0	0	0	0	0	0
	396	0	0	0	0	0	0	0	0	0	0	0	0	0	0	0	0	0	0	0	0									396	0	0	0	0	0	0	0	0	0	0	0	0	0	0	0	0	0	0	0
	397	0	0	0	0	0	0	0	0	0	0	0	0	0	0	0	0	0	0	0	0									397	0	0	0	0	0	0	0	0	0	0	0	0	0	0	0	0	0	0	0
	398	0	0	0	0	0	0	0	0	0	0	0	0	0	0	0	0	0	0	0	0									398	0	0	0	0	0	0	0	0	0	0	0	0	0	0	0	0	0	0	0
	399	0	0	0	0	0	0	0	0	0	0	0	0	0	0	0	0	0	0	0	0									399	0	0	0	0	0	0	0	0	0	0	0	0	0	0	0	0	0	0	0
	400	0	0	0	0	0	0	0	0	0	0	0	0	0	0	0	0	0	0	0	0									400	0	0	0	0	0	0	0	0	0	0	0	0	0	0	0	0	0	0	0
	401	0	0	0	0	0	0	0	0	0	0	0	0	0	0	0	0	0	0	0	0									401	0	0	0	0	0	0	0	0	0	0	0	0	0	0	0	0	0	0	0
	402	0	0	0	0	0	0	0	0	0	0	0	0	0	0	0	0	0	0	0	0									402	0	0	0	0	0	0	0	0	0	0	0	0	0	0	0	0	0	0	0
	403	0	0	0	0	0	0	0	0	0	0	0	0	0	0	0	0	0	0	0	0									403	0	0	0	0	0	0	0	0	0	0	0	0	0	0	0	0	0	0	0
	404	0	0	0	0	0	0	0	0	0	0	0	0	0	0	0	0	0	0	0	0									404	0	0	0	0	0	0	0	0	0	0	0	0	0	0	0	0	0	0	0
	405	0	0	0	0	0	0	0	0	0	0	0	0	0	0	0	0	0	0	0	0									405	0	0	0	0	0	0	0	0	0	0	0	0	0	0	0	0	0	0	0
	406	0	0	0	0	0	0	0	0	0	0	0	0	0	0	0	0	0	0	0	0									406	0	0	0	0	0	0	0	0	0	0	0	0	0	0	0	0	0	0	0
	407	0	0	0	0	0	0	0	0	0	0	0	0	0	0	0	0	0	0	0	0									407	0	0	0	0	0	0	0	0	0	0	0	0	0	0	0	0	0	0	0
	408	0	0	0	0	0	0	0	0	0	0	0	0	0	0	0	0	0	0	0	0									408	0	0	0	0	0	0	0	0	0	0	0	0	0	0	0	0	0	0	0
	409	0	0	0	0	0	0	0	0	0	0	0	0	0	0	0	0	0	0	0	0									409	0	0	0	0	0	0	0	0	0	0	0	0	0	0	0	0	0	0	0
	410	0	0	0	0	0	0	0	0	0	0	0	0	0	0	0	0	0	0	0	0									410	0	0	0	0	0	0	0	0	0	0	0	0	0	0	0	0	0	0	0
	411	0	0	0	0	0	0	0	0	0	0	0	0	0	0	0	0	0	0	0	0									411	0	0	0	0	0	0	0	0	0	0	0	0	0	0	0	0	0	0	0
	412	0	0	0	0	0	0	0	0	0	0	0	0	0	0	0	0	0	0	0	0									412	0	0	0	0	0	0	0	0	0	0	0	0	0	0	0	0	0	0	0
	413	0	0	0	0	0	0	0	0	0	0	0	0	0	0	0	0	0	0	0	0									413	0	0	0	0	0	0	0	0	0	0	0	0	0	0	0	0	0	0	0
	414	0	0	0	0	0	0	0	0	0	0	0	0	0	0	0	0	0	0	0	0									414	0	0	0	0	0	0	0	0	0	0	0	0	0	0	0	0	0	0	0
	415	0	0	0	0	0	0	0	0	0	0	0	0	0	0	0	0	0	0	0	0									415	0	0	0	0	0	0	0	0	0	0	0	0	0	0	0	0	0	0	0
	416	0	0	0	0	0	0	0	0	0	0	0	0	0	0	0	0	0	0	0	0									416	0	0	0	0	0	0	0	0	0	0	0	0	0	0	0	0	0	0	0
	417	0	0	0	0	0	0	0	0	0	0	0	0	0	0	0	0	0	0	0	0									417	0	0	0	0	0	0	0	0	0	0	0	0	0	0	0	0	0	0	0
	418	0	0	0	0	0	0	0	0	0	0	0	0	0	0	0	0	0	0	0	0									418	0	0	0	0	0	0	0	0	0	0	0	0	0	0	0	0	0	0	0
	419	0	0	0	0	0	0	0	0	0	0	0	0	0	0	0	0	0	0	0	0									419	0	0	0	0	0	0	0	0	0	0	0	0	0	0	0	0	0	0	0
	420	0	0	0	0	0	0	0	0	0	0	0	0	0	0	0	0	0	0	0	0									420	0	0	0	0	0	0	0	0	0	0	0	0	0	0	0	0	0	0	0
	421	0	0	0	0	0	0	0	0	0	0	0	0	0	0	0	0	0	0	0	0									421	0	0	0	0	0	0	0	0	0	0	0	0	0	0	0	0	0	0	0
	422	0	0	0	0	0	0	0	0	0	0	0	0	0	0	0	0	0	0	0	0									422	0	0	0	0	0	0	0	0	0	0	0	0	0	0	0	0	0	0	0
	423	0	0	0	0	0	0	0	0	0	0	0	0	0	0	0	0	0	0	0	0									423	0	0	0	0	0	0	0	0	0	0	0	0	0	0	0	0	0	0	0
	424	0	0	0	0	0	0	0	0	0	0	0	0	0	0	0	0	0	0	0	0									424	0	0	0	0	0	0	0	0	0	0	0	0	0	0	0	0	0	0	0
	425	0	0	0	0	0	0	0	0	0	0	0	0	0	0	0	0	0	0	0	0									425	0	0	0	0	0	0	0	0	0	0	0	0	0	0	0	0	0	0	0
	426	0	0	0	0	0	0	0	0	0	0	0	0	0	0	0	0	0	0	0	0									426	0	0	0	0	0	0	0	0	0	0	0	0	0	0	0	0	0	0	0
	427	0	0	0	0	0	0	0	0	0	0	0	0	0	0	0	0	0	0	0	0									427	0	0	0	0	0	0	0	0	0	0	0	0	0	0	0	0	0	0	0
	428	0	0	0	0	0	0	0	0	0	0	0	0	0	0	0	0	0	0	0	0									428	0	0	0	0	0	0	0	0	0	0	0	0	0	0	0	0	0	0	0
	429	0	0	0	0	0	0	0	0	0	0	0	0	0	0	0	0	0	0	0	0									429	0	0	0	0	0	0	0	0	0	0	0	0	0	0	0	0	0	0	0
	430	0	0	0	0	0	0	0	0	0	0	0	0	0	0	0	0	0	0	0	0									430	0	0	0	0	0	0	0	0	0	0	0	0	0	0	0	0	0	0	0
	431	0	0	0	0	0	0	0	0	0	0	0	0	0	0	0	0	0	0	0	0									431	0	0	0	0	0	0	0	0	0	0	0	0	0	0	0	0	0	0	0
	432	0	0	0	0	0	0	0	0	0	0	0	0	0	0	0	0	0	0	0	0									432	0	0	0	0	0	0	0	0	0	0	0	0	0	0	0	0	0	0	0
	433	0	0	0	0	0	0	0	0	0	0	0	0	0	0	0	0	0	0	0	0									433	0	0	0	0	0	0	0	0	0	0	0	0	0	0	0	0	0	0	0
	434	0	0	0	0	0	0	0	0	0	0	0	0	0	0	0	0	0	0	0	0									434	0	0	0	0	0	0	0	0	0	0	0	0	0	0	0	0	0	0	0
	435	0	0	0	0	0	0	0	0	0	0	0	0	0	0	0	0	0	0	0	0									435	0	0	0	0	0	0	0	0	0	0	0	0	0	0	0	0	0	0	0
	436	0	0	0	0	0	0	0	0	0	0	0	0	0	0	0	0	0	0	0	0									436	0	0	0	0	0	0	0	0	0	0	0	0	0	0	0	0	0	0	0
	437	0	0	0	0	0	0	0	0	0	0	0	0	0	0	0	0	0	0	0	0									437	0	0	0	0	0	0	0	0	0	0	0	0	0	0	0	0	0	0	0
	438	0	0	0	0	0	0	0	0	0	0	0	0	0	0	0	0	0	0	0	0									438	0	0	0	0	0	0	0	0	0	0	0	0	0	0	0	0	0	0	0
	439	0	0	0	0	0	0	0	0	0	0	0	0	0	0	0	0	0	0	0	0									439	0	0	0	0	0	0	0	0	0	0	0	0	0	0	0	0	0	0	0
	440	0	0	0	0	0	0	0	0	0	0	0	0	0	0	0	0	0	0	0	0									440	0	0	0	0	0	0	0	0	0	0	0	0	0	0	0	0	0	0	0
	441	0	0	0	0	0	0	0	0	0	0	0	0	0	0	0	0	0	0	0	0									441	0	0	0	0	0	0	0	0	0	0	0	0	0	0	0	0	0	0	0
	442	0	0	0	0	0	0	0	0	0	0	0	0	0	0	0	0	0	0	0	0									442	0	0	0	0	0	0	0	0	0	0	0	0	0	0	0	0	0	0	0
	443	0	0	0	0	0	0	0	0	0	0	0	0	0	0	0	0	0	0	0	0									443	0	0	0	0	0	0	0	0	0	0	0	0	0	0	0	0	0	0	0
	444	0	0	0	0	0	0	0	0	0	0	0	0	0	0	0	0	0	0	0	0									444	0	0	0	0	0	0	0	0	0	0	0	0	0	0	0	0	0	0	0
	445	0	0	0	0	0	0	0	0	0	0	0	0	0	0	0	0	0	0	0	0									445	0	0	0	0	0	0	0	0	0	0	0	0	0	0	0	0	0	0	0
	446	0	0	0	0	0	0	0	0	0	0	0	0	0	0	0	0	0	0	0	0									446	0	0	0	0	0	0	0	0	0	0	0	0	0	0	0	0	0	0	0
	447	0	0	0	0	0	0	0	0	0	0	0	0	0	0	0	0	0	0	0	0									447	0	0	0	0	0	0	0	0	0	0	0	0	0	0	0	0	0	0	0
	448	0	0	0	0	0	0	0	0	0	0	0	0	0	0	0	0	0	0	0	0									448	0	0	0	0	0	0	0	0	0	0	0	0	0	0	0	0	0	0	0
	449	0	0	0	0	0	0	0	0	0	0	0	0	0	0	0	0	0	0	0	0									449	0	0	0	0	0	0	0	0	0	0	0	0	0	0	0	0	0	0	0
	450	0	0	0	0	0	0	0	0	0	0	0	0	0	0	0	0	0	0	0	0									450	0	0	0	0	0	0	0	0	0	0	0	0	0	0	0	0	0	0	0
	451	0	0	0	0	0	0	0	0	0	0	0	0	0	0	0	0	0	0	0	0									451	0	0	0	0	0	0	0	0	0	0	0	0	0	0	0	0	0	0	0
	452	0	0	0	0	0	0	0	0	0	0	0	0	0	0	0	0	0	0	0	0									452	0	0	0	0	0	0	0	0	0	0	0	0	0	0	0	0	0	0	0
	453	0	0	0	0	0	0	0	0	0	0	0	0	0	0	0	0	0	0	0	0									453	0	0	0	0	0	0	0	0	0	0	0	0	0	0	0	0	0	0	0
	454	0	0	0	0	0	0	0	0	0	0	0	0	0	0	0	0	0	0	0	0									454	0	0	0	0	0	0	0	0	0	0	0	0	0	0	0	0	0	0	0
	455	0	0	0	0	0	0	0	0	0	0	0	0	0	0	0	0	0	0	0	0									455	0	0	0	0	0	0	0	0	0	0	0	0	0	0	0	0	0	0	0
	456	0	0	0	0	0	0	0	0	0	0	0	0	0	0	0	0	0	0	0	0									456	0	0	0	0	0	0	0	0	0	0	0	0	0	0	0	0	0	0	0
	457	0	0	0	0	0	0	0	0	0	0	0	0	0	0	0	0	0	0	0	0									457	0	0	0	0	0	0	0	0	0	0	0	0	0	0	0	0	0	0	0
	458	0	0	0	0	0	0	0	0	0	0	0	0	0	0	0	0	0	0	0	0									458	0	0	0	0	0	0	0	0	0	0	0	0	0	0	0	0	0	0	0
	459	0	0	0	0	0	0	0	0	0	0	0	0	0	0	0	0	0	0	0	0									459	0	0	0	0	0	0	0	0	0	0	0	0	0	0	0	0	0	0	0
	460	0	0	0	0	0	0	0	0	0	0	0	0	0	0	0	0	0	0	0	0									460	0	0	0	0	0	0	0	0	0	0	0	0	0	0	0	0	0	0	0
	461	0	0	0	0	0	0	0	0	0	0	0	0	0	0	0	0	0	0	0	0									461	0	0	0	0	0	0	0	0	0	0	0	0	0	0	0	0	0	0	0
	462	0	0	0	0	0	0	0	0	0	0	0	0	0	0	0	0	0	0	0	0									462	0	0	0	0	0	0	0	0	0	0	0	0	0	0	0	0	0	0	0
	463	0	0	0	0	0	0	0	0	0	0	0	0	0	0	0	0	0	0	0	0									463	0	0	0	0	0	0	0	0	0	0	0	0	0	0	0	0	0	0	0
	464	0	0	0	0	0	0	0	0	0	0	0	0	0	0	0	0	0	0	0	0									464	0	0	0	0	0	0	0	0	0	0	0	0	0	0	0	0	0	0	0
	465	0	0	0	0	0	0	0	0	0	0	0	0	0	0	0	0	0	0	0	0									465	0	0	0	0	0	0	0	0	0	0	0	0	0	0	0	0	0	0	0
	466	0	0	0	0	0	0	0	0	0	0	0	0	0	0	0	0	0	0	0	0									466	0	0	0	0	0	0	0	0	0	0	0	0	0	0	0	0	0	0	0
	467	0	0	0	0	0	0	0	0	0	0	0	0	0	0	0	0	0	0	0	0									467	0	0	0	0	0	0	0	0	0	0	0	0	0	0	0	0	0	0	0
	468	0	0	0	0	0	0	0	0	0	0	0	0	0	0	0	0	0	0	0	0									468	0	0	0	0	0	0	0	0	0	0	0	0	0	0	0	0	0	0	0
	469	0	0	0	0	0	0	0	0	0	0	0	0	0	0	0	0	0	0	0	0									469	0	0	0	0	0	0	0	0	0	0	0	0	0	0	0	0	0	0	0
	470	0	0	0	0	0	0	0	0	0	0	0	0	0	0	0	0	0	0	0	0									470	0	0	0	0	0	0	0	0	0	0	0	0	0	0	0	0	0	0	0
	471	0	0	0	0	0	0	0	0	0	0	0	0	0	0	0	0	0	0	0	0									471	0	0	0	0	0	0	0	0	0	0	0	0	0	0	0	0	0	0	0
	472	0	0	0	0	0	0	0	0	0	0	0	0	0	0	0	0	0	0	0	0									472	0	0	0	0	0	0	0	0	0	0	0	0	0	0	0	0	0	0	0
	473	0	0	0	0	0	0	0	0	0	0	0	0	0	0	0	0	0	0	0	0									473	0	0	0	0	0	0	0	0	0	0	0	0	0	0	0	0	0	0	0
	474	0	0	0	0	0	0	0	0	0	0	0	0	0	0	0	0	0	0	0	0									474	0	0	0	0	0	0	0	0	0	0	0	0	0	0	0	0	0	0	0
	475	0	0	0	0	0	0	0	0	0	0	0	0	0	0	0	0	0	0	0	0									475	0	0	0	0	0	0	0	0	0	0	0	0	0	0	0	0	0	0	0
	476	0	0	0	0	0	0	0	0	0	0	0	0	0	0	0	0	0	0	0	0									476	0	0	0	0	0	0	0	0	0	0	0	0	0	0	0	0	0	0	0
	477	0	0	0	0	0	0	0	0	0	0	0	0	0	0	0	0	0	0	0	0									477	0	0	0	0	0	0	0	0	0	0	0	0	0	0	0	0	0	0	0
	478	0	0	0	0	0	0	0	0	0	0	0	0	0	0	0	0	0	0	0	0									478	0	0	0	0	0	0	0	0	0	0	0	0	0	0	0	0	0	0	0
	479	0	0	0	0	0	0	0	0	0	0	0	0	0	0	0	0	0	0	0	0									479	0	0	0	0	0	0	0	0	0	0	0	0	0	0	0	0	0	0	0
	480	0	0	0	0	0	0	0	0	0	0	0	0	0	0	0	0	0	0	0	0									480	0	0	0	0	0	0	0	0	0	0	0	0	0	0	0	0	0	0	0
	481	0	0	0	0	0	0	0	0	0	0	0	0	0	0	0	0	0	0	0	0									481	0	0	0	0	0	0	0	0	0	0	0	0	0	0	0	0	0	0	0
	482	0	0	0	0	0	0	0	0	0	0	0	0	0	0	0	0	0	0	0	0									482	0	0	0	0	0	0	0	0	0	0	0	0	0	0	0	0	0	0	0
	483	0	0	0	0	0	0	0	0	0	0	0	0	0	0	0	0	0	0	0	0									483	0	0	0	0	0	0	0	0	0	0	0	0	0	0	0	0	0	0	0
	484	0	0	0	0	0	0	0	0	0	0	0	0	0	0	0	0	0	0	0	0									484	0	0	0	0	0	0	0	0	0	0	0	0	0	0	0	0	0	0	0
	485	0	0	0	0	0	0	0	0	0	0	0	0	0	0	0	0	0	0	0	0									485	0	0	0	0	0	0	0	0	0	0	0	0	0	0	0	0	0	0	0
	486	0	0	0	0	0	0	0	0	0	0	0	0	0	0	0	0	0	0	0	0									486	0	0	0	0	0	0	0	0	0	0	0	0	0	0	0	0	0	0	0
	487	0	0	0	0	0	0	0	0	0	0	0	0	0	0	0	0	0	0	0	0									487	0	0	0	0	0	0	0	0	0	0	0	0	0	0	0	0	0	0	0
	488	0	0	0	0	0	0	0	0	0	0	0	0	0	0	0	0	0	0	0	0									488	0	0	0	0	0	0	0	0	0	0	0	0	0	0	0	0	0	0	0
	489	0	0	0	0	0	0	0	0	0	0	0	0	0	0	0	0	0	0	0	0									489	0	0	0	0	0	0	0	0	0	0	0	0	0	0	0	0	0	0	0
	490	0	0	0	0	0	0	0	0	0	0	0	0	0	0	0	0	0	0	0	0									490	0	0	0	0	0	0	0	0	0	0	0	0	0	0	0	0	0	0	0
	491	0	0	0	0	0	0	0	0	0	0	0	0	0	0	0	0	0	0	0	0									491	0	0	0	0	0	0	0	0	0	0	0	0	0	0	0	0	0	0	0
	492	0	0	0	0	0	0	0	0	0	0	0	0	0	0	0	0	0	0	0	0									492	0	0	0	0	0	0	0	0	0	0	0	0	0	0	0	0	0	0	0
	493	0	0	0	0	0	0	0	0	0	0	0	0	0	0	0	0	0	0	0	0									493	0	0	0	0	0	0	0	0	0	0	0	0	0	0	0	0	0	0	0
	494	0	0	0	0	0	0	0	0	0	0	0	0	0	0	0	0	0	0	0	0									494	0	0	0	0	0	0	0	0	0	0	0	0	0	0	0	0	0	0	0
	495	0	0	0	0	0	0	0	0	0	0	0	0	0	0	0	0	0	0	0	0									495	0	0	0	0	0	0	0	0	0	0	0	0	0	0	0	0	0	0	0
	496	0	0	0	0	0	0	0	0	0	0	0	0	0	0	0	0	0	0	0	0									496	0	0	0	0	0	0	0	0	0	0	0	0	0	0	0	0	0	0	0
	497	0	0	0	0	0	0	0	0	0	0	0	0	0	0	0	0	0	0	0	0									497	0	0	0	0	0	0	0	0	0	0	0	0	0	0	0	0	0	0	0
	498	0	0	0	0	0	0	0	0	0	0	0	0	0	0	0	0	0	0	0	0									498	0	0	0	0	0	0	0	0	0	0	0	0	0	0	0	0	0	0	0
	499	0	0	0	0	0	0	0	0	0	0	0	0	0	0	0	0	0	0	0	0									499	0	0	0	0	0	0	0	0	0	0	0	0	0	0	0	0	0	0	0
	500	0	0	0	0	0	0	0	0	0	0	0	0	0	0	0	0	0	0	0	0									500	0	0	0	0	0	0	0	0	0	0	0	0	0	0	0	0	0	0	0
	501	0	0	0	0	0	0	0	0	0	0	0	0	0	0	0	0	0	0	0	0									501	0	0	0	0	0	0	0	0	0	0	0	0	0	0	0	0	0	0	0
	502	0	0	0	0	0	0	0	0	0	0	0	0	0	0	0	0	0	0	0	0									502	0	0	0	0	0	0	0	0	0	0	0	0	0	0	0	0	0	0	0
	503	0	0	0	0	0	0	0	0	0	0	0	0	0	0	0	0	0	0	0	0									503	0	0	0	0	0	0	0	0	0	0	0	0	0	0	0	0	0	0	0
	504	0	0	0	0	0	0	0	0	0	0	0	0	0	0	0	0	0	0	0	0									504	0	0	0	0	0	0	0	0	0	0	0	0	0	0	0	0	0	0	0
	505	0	0	0	0	0	0	0	0	0	0	0	0	0	0	0	0	0	0	0	0									505	0	0	0	0	0	0	0	0	0	0	0	0	0	0	0	0	0	0	0
	506	0	0	0	0	0	0	0	0	0	0	0	0	0	0	0	0	0	0	0	0									506	0	0	0	0	0	0	0	0	0	0	0	0	0	0	0	0	0	0	0
	507	0	0	0	0	0	0	0	0	0	0	0	0	0	0	0	0	0	0	0	0									507	0	0	0	0	0	0	0	0	0	0	0	0	0	0	0	0	0	0	0
	508	0	0	0	0	0	0	0	0	0	0	0	0	0	0	0	0	0	0	0	0									508	0	0	0	0	0	0	0	0	0	0	0	0	0	0	0	0	0	0	0
	509	0	0	0	0	0	0	0	0	0	0	0	0	0	0	0	0	0	0	0	0									509	0	0	0	0	0	0	0	0	0	0	0	0	0	0	0	0	0	0	0
	510	0	0	0	0	0	0	0	0	0	0	0	0	0	0	0	0	0	0	0	0									510	0	0	0	0	0	0	0	0	0	0	0	0	0	0	0	0	0	0	0
	511	0	0	0	0	0	0	0	0	0	0	0	0	0	0	0	0	0	0	0	0									511	0	0	0	0	0	0	0	0	0	0	0	0	0	0	0	0	0	0	0
	512	0	0	0	0	0	0	0	0	0	0	0	0	0	0	0	0	0	0	0	0									512	0	0	0	0	0	0	0	0	0	0	0	0	0	0	0	0	0	0	0
	513	0	0	0	0	0	0	0	0	0	0	0	0	0	0	0	0	0	0	0	0									513	0	0	0	0	0	0	0	0	0	0	0	0	0	0	0	0	0	0	0
	514	0	0	0	0	0	0	0	0	0	0	0	0	0	0	0	0	0	0	0	0									514	0	0	0	0	0	0	0	0	0	0	0	0	0	0	0	0	0	0	0
	515	0	0	0	0	0	0	0	0	0	0	0	0	0	0	0	0	0	0	0	0									515	0	0	0	0	0	0	0	0	0	0	0	0	0	0	0	0	0	0	0
	516	0	0	0	0	0	0	0	0	0	0	0	0	0	0	0	0	0	0	0	0									516	0	0	0	0	0	0	0	0	0	0	0	0	0	0	0	0	0	0	0
	517	0	0	0	0	0	0	0	0	0	0	0	0	0	0	0	0	0	0	0	0									517	0	0	0	0	0	0	0	0	0	0	0	0	0	0	0	0	0	0	0
	518	0	0	0	0	0	0	0	0	0	0	0	0	0	0	0	0	0	0	0	0									518	0	0	0	0	0	0	0	0	0	0	0	0	0	0	0	0	0	0	0
	519	0	0	0	0	0	0	0	0	0	0	0	0	0	0	0	0	0	0	0	0									519	0	0	0	0	0	0	0	0	0	0	0	0	0	0	0	0	0	0	0
	520	0	0	0	0	0	0	0	0	0	0	0	0	0	0	0	0	0	0	0	0									520	0	0	0	0	0	0	0	0	0	0	0	0	0	0	0	0	0	0	0
	521	0	0	0	0	0	0	0	0	0	0	0	0	0	0	0	0	0	0	0	0									521	0	0	0	0	0	0	0	0	0	0	0	0	0	0	0	0	0	0	0
	522	0	0	0	0	0	0	0	0	0	0	0	0	0	0	0	0	0	0	0	0									522	0	0	0	0	0	0	0	0	0	0	0	0	0	0	0	0	0	0	0
	523	0	0	0	0	0	0	0	0	0	0	0	0	0	0	0	0	0	0	0	0									523	0	0	0	0	0	0	0	0	0	0	0	0	0	0	0	0	0	0	0
	524	0	0	0	0	0	0	0	0	0	0	0	0	0	0	0	0	0	0	0	0									524	0	0	0	0	0	0	0	0	0	0	0	0	0	0	0	0	0	0	0
	525	0	0	0	0	0	0	0	0	0	0	0	0	0	0	0	0	0	0	0	0									525	0	0	0	0	0	0	0	0	0	0	0	0	0	0	0	0	0	0	0
	526	0	0	0	0	0	0	0	0	0	0	0	0	0	0	0	0	0	0	0	0									526	0	0	0	0	0	0	0	0	0	0	0	0	0	0	0	0	0	0	0
	527	0	0	0	0	0	0	0	0	0	0	0	0	0	0	0	0	0	0	0	0									527	0	0	0	0	0	0	0	0	0	0	0	0	0	0	0	0	0	0	0
	528	0	0	0	0	0	0	0	0	0	0	0	0	0	0	0	0	0	0	0	0									528	0	0	0	0	0	0	0	0	0	0	0	0	0	0	0	0	0	0	0
	529	0	0	0	0	0	0	0	0	0	0	0	0	0	0	0	0	0	0	0	0									529	0	0	0	0	0	0	0	0	0	0	0	0	0	0	0	0	0	0	0
	530	0	0	0	0	0	0	0	0	0	0	0	0	0	0	0	0	0	0	0	0									530	0	0	0	0	0	0	0	0	0	0	0	0	0	0	0	0	0	0	0
	531	0	0	0	0	0	0	0	0	0	0	0	0	0	0	0	0	0	0	0	0									531	0	0	0	0	0	0	0	0	0	0	0	0	0	0	0	0	0	0	0
	532	0	0	0	0	0	0	0	0	0	0	0	0	0	0	0	0	0	0	0	0									532	0	0	0	0	0	0	0	0	0	0	0	0	0	0	0	0	0	0	0
	533	0	0	0	0	0	0	0	0	0	0	0	0	0	0	0	0	0	0	0	0									533	0	0	0	0	0	0	0	0	0	0	0	0	0	0	0	0	0	0	0
	534	0	0	0	0	0	0	0	0	0	0	0	0	0	0	0	0	0	0	0	0									534	0	0	0	0	0	0	0	0	0	0	0	0	0	0	0	0	0	0	0
	535	0	0	0	0	0	0	0	0	0	0	0	0	0	0	0	0	0	0	0	0									535	0	0	0	0	0	0	0	0	0	0	0	0	0	0	0	0	0	0	0
	536	0	0	0	0	0	0	0	0	0	0	0	0	0	0	0	0	0	0	0	0									536	0	0	0	0	0	0	0	0	0	0	0	0	0	0	0	0	0	0	0
	537	0	0	0	0	0	0	0	0	0	0	0	0	0	0	0	0	0	0	0	0									537	0	0	0	0	0	0	0	0	0	0	0	0	0	0	0	0	0	0	0
	538	0	0	0	0	0	0	0	0	0	0	0	0	0	0	0	0	0	0	0	0									538	0	0	0	0	0	0	0	0	0	0	0	0	0	0	0	0	0	0	0
	539	0	0	0	0	0	0	0	0	0	0	0	0	0	0	0	0	0	0	0	0									539	0	0	0	0	0	0	0	0	0	0	0	0	0	0	0	0	0	0	0
	540	0	0	0	0	0	0	0	0	0	0	0	0	0	0	0	0	0	0	0	0									540	0	0	0	0	0	0	0	0	0	0	0	0	0	0	0	0	0	0	0
	541	0	0	0	0	0	0	0	0	0	0	0	0	0	0	0	0	0	0	0	0									541	0	0	0	0	0	0	0	0	0	0	0	0	0	0	0	0	0	0	0
	542	0	0	0	0	0	0	0	0	0	0	0	0	0	0	0	0	0	0	0	0									542	0	0	0	0	0	0	0	0	0	0	0	0	0	0	0	0	0	0	0
	543	0	0	0	0	0	0	0	0	0	0	0	0	0	0	0	0	0	0	0	0									543	0	0	0	0	0	0	0	0	0	0	0	0	0	0	0	0	0	0	0
	544	0	0	0	0	0	0	0	0	0	0	0	0	0	0	0	0	0	0	0	0									544	0	0	0	0	0	0	0	0	0	0	0	0	0	0	0	0	0	0	0
	545	0	0	0	0	0	0	0	0	0	0	0	0	0	0	0	0	0	0	0	0									545	0	0	0	0	0	0	0	0	0	0	0	0	0	0	0	0	0	0	0
	546	0	0	0	0	0	0	0	0	0	0	0	0	0	0	0	0	0	0	0	0									546	0	0	0	0	0	0	0	0	0	0	0	0	0	0	0	0	0	0	0
	547	0	0	0	0	0	0	0	0	0	0	0	0	0	0	0	0	0	0	0	0									547	0	0	0	0	0	0	0	0	0	0	0	0	0	0	0	0	0	0	0
	548	0	0	0	0	0	0	0	0	0	0	0	0	0	0	0	0	0	0	0	0									548	0	0	0	0	0	0	0	0	0	0	0	0	0	0	0	0	0	0	0
	549	0	0	0	0	0	0	0	0	0	0	0	0	0	0	0	0	0	0	0	0									549	0	0	0	0	0	0	0	0	0	0	0	0	0	0	0	0	0	0	0
	550	0	0	0	0	0	0	0	0	0	0	0	0	0	0	0	0	0	0	0	0									550	0	0	0	0	0	0	0	0	0	0	0	0	0	0	0	0	0	0	0
	551	0	0	0	0	0	0	0	0	0	0	0	0	0	0	0	0	0	0	0	0									551	0	0	0	0	0	0	0	0	0	0	0	0	0	0	0	0	0	0	0
	552	0	0	0	0	0	0	0	0	0	0	0	0	0	0	0	0	0	0	0	0									552	0	0	0	0	0	0	0	0	0	0	0	0	0	0	0	0	0	0	0
	553	0	0	0	0	0	0	0	0	0	0	0	0	0	0	0	0	0	0	0	0									553	0	0	0	0	0	0	0	0	0	0	0	0	0	0	0	0	0	0	0
	554	0	0	0	0	0	0	0	0	0	0	0	0	0	0	0	0	0	0	0	0									554	0	0	0	0	0	0	0	0	0	0	0	0	0	0	0	0	0	0	0
	555	0	0	0	0	0	0	0	0	0	0	0	0	0	0	0	0	0	0	0	0									555	0	0	0	0	0	0	0	0	0	0	0	0	0	0	0	0	0	0	0
	556	0	0	0	0	0	0	0	0	0	0	0	0	0	0	0	0	0	0	0	0									556	0	0	0	0	0	0	0	0	0	0	0	0	0	0	0	0	0	0	0
	557	0	0	0	0	0	0	0	0	0	0	0	0	0	0	0	0	0	0	0	0									557	0	0	0	0	0	0	0	0	0	0	0	0	0	0	0	0	0	0	0
	558	0	0	0	0	0	0	0	0	0	0	0	0	0	0	0	0	0	0	0	0									558	0	0	0	0	0	0	0	0	0	0	0	0	0	0	0	0	0	0	0
	559	0	0	0	0	0	0	0	0	0	0	0	0	0	0	0	0	0	0	0	0									559	0	0	0	0	0	0	0	0	0	0	0	0	0	0	0	0	0	0	0
	560	0	0	0	0	0	0	0	0	0	0	0	0	0	0	0	0	0	0	0	0									560	0	0	0	0	0	0	0	0	0	0	0	0	0	0	0	0	0	0	0
	561	0	0	0	0	0	0	0	0	0	0	0	0	0	0	0	0	0	0	0	0									561	0	0	0	0	0	0	0	0	0	0	0	0	0	0	0	0	0	0	0
	562	0	0	0	0	0	0	0	0	0	0	0	0	0	0	0	0	0	0	0	0									562	0	0	0	0	0	0	0	0	0	0	0	0	0	0	0	0	0	0	0
	563	0	0	0	0	0	0	0	0	0	0	0	0	0	0	0	0	0	0	0	0									563	0	0	0	0	0	0	0	0	0	0	0	0	0	0	0	0	0	0	0
	564	0	0	0	0	0	0	0	0	0	0	0	0	0	0	0	0	0	0	0	0									564	0	0	0	0	0	0	0	0	0	0	0	0	0	0	0	0	0	0	0
	565	0	0	0	0	0	0	0	0	0	0	0	0	0	0	0	0	0	0	0	0									565	0	0	0	0	0	0	0	0	0	0	0	0	0	0	0	0	0	0	0
	566	0	0	0	0	0	0	0	0	0	0	0	0	0	0	0	0	0	0	0	0									566	0	0	0	0	0	0	0	0	0	0	0	0	0	0	0	0	0	0	0
	567	0	0	0	0	0	0	0	0	0	0	0	0	0	0	0	0	0	0	0	0									567	0	0	0	0	0	0	0	0	0	0	0	0	0	0	0	0	0	0	0
	568	0	0	0	0	0	0	0	0	0	0	0	0	0	0	0	0	0	0	0	0									568	0	0	0	0	0	0	0	0	0	0	0	0	0	0	0	0	0	0	0
	569	0	0	0	0	0	0	0	0	0	0	0	0	0	0	0	0	0	0	0	0									569	0	0	0	0	0	0	0	0	0	0	0	0	0	0	0	0	0	0	0
	570	0	0	0	0	0	0	0	0	0	0	0	0	0	0	0	0	0	0	0	0									570	0	0	0	0	0	0	0	0	0	0	0	0	0	0	0	0	0	0	0
	571	0	0	0	0	0	0	0	0	0	0	0	0	0	0	0	0	0	0	0	0									571	0	0	0	0	0	0	0	0	0	0	0	0	0	0	0	0	0	0	0
	572	0	0	0	0	0	0	0	0	0	0	0	0	0	0	0	0	0	0	0	0									572	0	0	0	0	0	0	0	0	0	0	0	0	0	0	0	0	0	0	0
	573	0	0	0	0	0	0	0	0	0	0	0	0	0	0	0	0	0	0	0	0									573	0	0	0	0	0	0	0	0	0	0	0	0	0	0	0	0	0	0	0
	574	0	0	0	0	0	0	0	0	0	0	0	0	0	0	0	0	0	0	0	0									574	0	0	0	0	0	0	0	0	0	0	0	0	0	0	0	0	0	0	0
	575	0	0	0	0	0	0	0	0	0	0	0	0	0	0	0	0	0	0	0	0									575	0	0	0	0	0	0	0	0	0	0	0	0	0	0	0	0	0	0	0
	576	0	0	0	0	0	0	0	0	0	0	0	0	0	0	0	0	0	0	0	0									576	0	0	0	0	0	0	0	0	0	0	0	0	0	0	0	0	0	0	0
	577	0	0	0	0	0	0	0	0	0	0	0	0	0	0	0	0	0	0	0	0									577	0	0	0	0	0	0	0	0	0	0	0	0	0	0	0	0	0	0	0
	578	0	0	0	0	0	0	0	0	0	0	0	0	0	0	0	0	0	0	0	0									578	0	0	0	0	0	0	0	0	0	0	0	0	0	0	0	0	0	0	0
	579	0	0	0	0	0	0	0	0	0	0	0	0	0	0	0	0	0	0	0	0									579	0	0	0	0	0	0	0	0	0	0	0	0	0	0	0	0	0	0	0
	580	0	0	0	0	0	0	0	0	0	0	0	0	0	0	0	0	0	0	0	0									580	0	0	0	0	0	0	0	0	0	0	0	0	0	0	0	0	0	0	0
	581	0	0	0	0	0	0	0	0	0	0	0	0	0	0	0	0	0	0	0	0									581	0	0	0	0	0	0	0	0	0	0	0	0	0	0	0	0	0	0	0
	582	0	0	0	0	0	0	0	0	0	0	0	0	0	0	0	0	0	0	0	0									582	0	0	0	0	0	0	0	0	0	0	0	0	0	0	0	0	0	0	0
	583	0	0	0	0	0	0	0	0	0	0	0	0	0	0	0	0	0	0	0	0									583	0	0	0	0	0	0	0	0	0	0	0	0	0	0	0	0	0	0	0
	584	0	0	0	0	0	0	0	0	0	0	0	0	0	0	0	0	0	0	0	0									584	0	0	0	0	0	0	0	0	0	0	0	0	0	0	0	0	0	0	0
	585	0	0	0	0	0	0	0	0	0	0	0	0	0	0	0	0	0	0	0	0									585	0	0	0	0	0	0	0	0	0	0	0	0	0	0	0	0	0	0	0
	586	0	0	0	0	0	0	0	0	0	0	0	0	0	0	0	0	0	0	0	0									586	0	0	0	0	0	0	0	0	0	0	0	0	0	0	0	0	0	0	0
	587	0	0	0	0	0	0	0	0	0	0	0	0	0	0	0	0	0	0	0	0									587	0	0	0	0	0	0	0	0	0	0	0	0	0	0	0	0	0	0	0
	588	0	0	0	0	0	0	0	0	0	0	0	0	0	0	0	0	0	0	0	0									588	0	0	0	0	0	0	0	0	0	0	0	0	0	0	0	0	0	0	0
	589	0	0	0	0	0	0	0	0	0	0	0	0	0	0	0	0	0	0	0	0									589	0	0	0	0	0	0	0	0	0	0	0	0	0	0	0	0	0	0	0
	590	0	0	0	0	0	0	0	0	0	0	0	0	0	0	0	0	0	0	0	0									590	0	0	0	0	0	0	0	0	0	0	0	0	0	0	0	0	0	0	0
	591	0	0	0	0	0	0	0	0	0	0	0	0	0	0	0	0	0	0	0	0									591	0	0	0	0	0	0	0	0	0	0	0	0	0	0	0	0	0	0	0
	592	0	0	0	0	0	0	0	0	0	0	0	0	0	0	0	0	0	0	0	0									592	0	0	0	0	0	0	0	0	0	0	0	0	0	0	0	0	0	0	0
	593	0	0	0	0	0	0	0	0	0	0	0	0	0	0	0	0	0	0	0	0									593	0	0	0	0	0	0	0	0	0	0	0	0	0	0	0	0	0	0	0
	594	0	0	0	0	0	0	0	0	0	0	0	0	0	0	0	0	0	0	0	0									594	0	0	0	0	0	0	0	0	0	0	0	0	0	0	0	0	0	0	0
	595	0	0	0	0	0	0	0	0	0	0	0	0	0	0	0	0	0	0	0	0									595	0	0	0	0	0	0	0	0	0	0	0	0	0	0	0	0	0	0	0
	596	0	0	0	0	0	0	0	0	0	0	0	0	0	0	0	0	0	0	0	0									596	0	0	0	0	0	0	0	0	0	0	0	0	0	0	0	0	0	0	0
	597	0	0	0	0	0	0	0	0	0	0	0	0	0	0	0	0	0	0	0	0									597	0	0	0	0	0	0	0	0	0	0	0	0	0	0	0	0	0	0	0
	598	0	0	0	0	0	0	0	0	0	0	0	0	0	0	0	0	0	0	0	0									598	0	0	0	0	0	0	0	0	0	0	0	0	0	0	0	0	0	0	0
	599	0	0	0	0	0	0	0	0	0	0	0	0	0	0	0	0	0	0	0	0									599	0	0	0	0	0	0	0	0	0	0	0	0	0	0	0	0	0	0	0
	600	0	0	0	0	0	0	0	0	0	0	0	0	0	0	0	0	0	0	0	0									600	0	0	0	0	0	0	0	0	0	0	0	0	0	0	0	0	0	0	0
	601	0	0	0	0	0	0	0	0	0	0	0	0	0	0	0	0	0	0	0	0									601	0	0	0	0	0	0	0	0	0	0	0	0	0	0	0	0	0	0	0
	602	0	0	0	0	0	0	0	0	0	0	0	0	0	0	0	0	0	0	0	0									602	0	0	0	0	0	0	0	0	0	0	0	0	0	0	0	0	0	0	0
	603	0	0	0	0	0	0	0	0	0	0	0	0	0	0	0	0	0	0	0	0									603	0	0	0	0	0	0	0	0	0	0	0	0	0	0	0	0	0	0	0
	604	0	0	0	0	0	0	0	0	0	0	0	0	0	0	0	0	0	0	0	0									604	0	0	0	0	0	0	0	0	0	0	0	0	0	0	0	0	0	0	0
	605	0	0	0	0	0	0	0	0	0	0	0	0	0	0	0	0	0	0	0	0									605	0	0	0	0	0	0	0	0	0	0	0	0	0	0	0	0	0	0	0
	606	0	0	0	0	0	0	0	0	0	0	0	0	0	0	0	0	0	0	0	0									606	0	0	0	0	0	0	0	0	0	0	0	0	0	0	0	0	0	0	0
	607	0	0	0	0	0	0	0	0	0	0	0	0	0	0	0	0	0	0	0	0									607	0	0	0	0	0	0	0	0	0	0	0	0	0	0	0	0	0	0	0
	608	0	0	0	0	0	0	0	0	0	0	0	0	0	0	0	0	0	0	0	0									608	0	0	0	0	0	0	0	0	0	0	0	0	0	0	0	0	0	0	0
	609	0	0	0	0	0	0	0	0	0	0	0	0	0	0	0	0	0	0	0	0									609	0	0	0	0	0	0	0	0	0	0	0	0	0	0	0	0	0	0	0
	610	0	0	0	0	0	0	0	0	0	0	0	0	0	0	0	0	0	0	0	0									610	0	0	0	0	0	0	0	0	0	0	0	0	0	0	0	0	0	0	0
	611	0	0	0	0	0	0	0	0	0	0	0	0	0	0	0	0	0	0	0	0									611	0	0	0	0	0	0	0	0	0	0	0	0	0	0	0	0	0	0	0
	612	0	0	0	0	0	0	0	0	0	0	0	0	0	0	0	0	0	0	0	0									612	0	0	0	0	0	0	0	0	0	0	0	0	0	0	0	0	0	0	0
	613	0	0	0	0	0	0	0	0	0	0	0	0	0	0	0	0	0	0	0	0									613	0	0	0	0	0	0	0	0	0	0	0	0	0	0	0	0	0	0	0
	614	0	0	0	0	0	0	0	0	0	0	0	0	0	0	0	0	0	0	0	0									614	0	0	0	0	0	0	0	0	0	0	0	0	0	0	0	0	0	0	0
	615	0	0	0	0	0	0	0	0	0	0	0	0	0	0	0	0	0	0	0	0									615	0	0	0	0	0	0	0	0	0	0	0	0	0	0	0	0	0	0	0
	616	0	0	0	0	0	0	0	0	0	0	0	0	0	0	0	0	0	0	0	0									616	0	0	0	0	0	0	0	0	0	0	0	0	0	0	0	0	0	0	0
	617	0	0	0	0	0	0	0	0	0	0	0	0	0	0	0	0	0	0	0	0									617	0	0	0	0	0	0	0	0	0	0	0	0	0	0	0	0	0	0	0
	618	0	0	0	0	0	0	0	0	0	0	0	0	0	0	0	0	0	0	0	0									618	0	0	0	0	0	0	0	0	0	0	0	0	0	0	0	0	0	0	0
	619	0	0	0	0	0	0	0	0	0	0	0	0	0	0	0	0	0	0	0	0									619	0	0	0	0	0	0	0	0	0	0	0	0	0	0	0	0	0	0	0
	620	0	0	0	0	0	0	0	0	0	0	0	0	0	0	0	0	0	0	0	0									620	0	0	0	0	0	0	0	0	0	0	0	0	0	0	0	0	0	0	0
	621	0	0	0	0	0	0	0	0	0	0	0	0	0	0	0	0	0	0	0	0									621	0	0	0	0	0	0	0	0	0	0	0	0	0	0	0	0	0	0	0
	622	0	0	0	0	0	0	0	0	0	0	0	0	0	0	0	0	0	0	0	0									622	0	0	0	0	0	0	0	0	0	0	0	0	0	0	0	0	0	0	0
	623	0	0	0	0	0	0	0	0	0	0	0	0	0	0	0	0	0	0	0	0									623	0	0	0	0	0	0	0	0	0	0	0	0	0	0	0	0	0	0	0
	624	0	0	0	0	0	0	0	0	0	0	0	0	0	0	0	0	0	0	0	0									624	0	0	0	0	0	0	0	0	0	0	0	0	0	0	0	0	0	0	0
	625	0	0	0	0	0	0	0	0	0	0	0	0	0	0	0	0	0	0	0	0									625	0	0	0	0	0	0	0	0	0	0	0	0	0	0	0	0	0	0	0
	626	0	0	0	0	0	0	0	0	0	0	0	0	0	0	0	0	0	0	0	0									626	0	0	0	0	0	0	0	0	0	0	0	0	0	0	0	0	0	0	0
	627	0	0	0	0	0	0	0	0	0	0	0	0	0	0	0	0	0	0	0	0									627	0	0	0	0	0	0	0	0	0	0	0	0	0	0	0	0	0	0	0
	628	0	0	0	0	0	0	0	0	0	0	0	0	0	0	0	0	0	0	0	0									628	0	0	0	0	0	0	0	0	0	0	0	0	0	0	0	0	0	0	0
	629	0	0	0	0	0	0	0	0	0	0	0	0	0	0	0	0	0	0	0	0									629	0	0	0	0	0	0	0	0	0	0	0	0	0	0	0	0	0	0	0
	630	0	0	0	0	0	0	0	0	0	0	0	0	0	0	0	0	0	0	0	0									630	0	0	0	0	0	0	0	0	0	0	0	0	0	0	0	0	0	0	0
	631	0	0	0	0	0	0	0	0	0	0	0	0	0	0	0	0	0	0	0	0									631	0	0	0	0	0	0	0	0	0	0	0	0	0	0	0	0	0	0	0
	632	0	0	0	0	0	0	0	0	0	0	0	0	0	0	0	0	0	0	0	0									632	0	0	0	0	0	0	0	0	0	0	0	0	0	0	0	0	0	0	0
	633	0	0	0	0	0	0	0	0	0	0	0	0	0	0	0	0	0	0	0	0									633	0	0	0	0	0	0	0	0	0	0	0	0	0	0	0	0	0	0	0
	634	0	0	0	0	0	0	0	0	0	0	0	0	0	0	0	0	0	0	0	0									634	0	0	0	0	0	0	0	0	0	0	0	0	0	0	0	0	0	0	0
	635	0	0	0	0	0	0	0	0	0	0	0	0	0	0	0	0	0	0	0	0									635	0	0	0	0	0	0	0	0	0	0	0	0	0	0	0	0	0	0	0
	636	0	0	0	0	0	0	0	0	0	0	0	0	0	0	0	0	0	0	0	0									636	0	0	0	0	0	0	0	0	0	0	0	0	0	0	0	0	0	0	0
	637	0	0	0	0	0	0	0	0	0	0	0	0	0	0	0	0	0	0	0	0									637	0	0	0	0	0	0	0	0	0	0	0	0	0	0	0	0	0	0	0
	638	0	0	0	0	0	0	0	0	0	0	0	0	0	0	0	0	0	0	0	0									638	0	0	0	0	0	0	0	0	0	0	0	0	0	0	0	0	0	0	0
	639	0	0	0	0	0	0	0	0	0	0	0	0	0	0	0	0	0	0	0	0									639	0	0	0	0	0	0	0	0	0	0	0	0	0	0	0	0	0	0	0
	640	0	0	0	0	0	0	0	0	0	0	0	0	0	0	0	0	0	0	0	0									640	0	0	0	0	0	0	0	0	0	0	0	0	0	0	0	0	0	0	0
	641	0	0	0	0	0	0	0	0	0	0	0	0	0	0	0	0	0	0	0	0									641	0	0	0	0	0	0	0	0	0	0	0	0	0	0	0	0	0	0	0
	642	0	0	0	0	0	0	0	0	0	0	0	0	0	0	0	0	0	0	0	0									642	0	0	0	0	0	0	0	0	0	0	0	0	0	0	0	0	0	0	0
	643	0	0	0	0	0	0	0	0	0	0	0	0	0	0	0	0	0	0	0	0									643	0	0	0	0	0	0	0	0	0	0	0	0	0	0	0	0	0	0	0
	644	0	0	0	0	0	0	0	0	0	0	0	0	0	0	0	0	0	0	0	0									644	0	0	0	0	0	0	0	0	0	0	0	0	0	0	0	0	0	0	0
	645	0	0	0	0	0	0	0	0	0	0	0	0	0	0	0	0	0	0	0	0									645	0	0	0	0	0	0	0	0	0	0	0	0	0	0	0	0	0	0	0
	646	0	0	0	0	0	0	0	0	0	0	0	0	0	0	0	0	0	0	0	0									646	0	0	0	0	0	0	0	0	0	0	0	0	0	0	0	0	0	0	0
	647	0	0	0	0	0	0	0	0	0	0	0	0	0	0	0	0	0	0	0	0									647	0	0	0	0	0	0	0	0	0	0	0	0	0	0	0	0	0	0	0
	648	0	0	0	0	0	0	0	0	0	0	0	0	0	0	0	0	0	0	0	0									648	0	0	0	0	0	0	0	0	0	0	0	0	0	0	0	0	0	0	0
	649	0	0	0	0	0	0	0	0	0	0	0	0	0	0	0	0	0	0	0	0									649	0	0	0	0	0	0	0	0	0	0	0	0	0	0	0	0	0	0	0
	650	0	0	0	0	0	0	0	0	0	0	0	0	0	0	0	0	0	0	0	0									650	0	0	0	0	0	0	0	0	0	0	0	0	0	0	0	0	0	0	0
	651	0	0	0	0	0	0	0	0	0	0	0	0	0	0	0	0	0	0	0	0									651	0	0	0	0	0	0	0	0	0	0	0	0	0	0	0	0	0	0	0
	652	0	0	0	0	0	0	0	0	0	0	0	0	0	0	0	0	0	0	0	0									652	0	0	0	0	0	0	0	0	0	0	0	0	0	0	0	0	0	0	0
	653	0	0	0	0	0	0	0	0	0	0	0	0	0	0	0	0	0	0	0	0									653	0	0	0	0	0	0	0	0	0	0	0	0	0	0	0	0	0	0	0
	654	0	0	0	0	0	0	0	0	0	0	0	0	0	0	0	0	0	0	0	0									654	0	0	0	0	0	0	0	0	0	0	0	0	0	0	0	0	0	0	0
	655	0	0	0	0	0	0	0	0	0	0	0	0	0	0	0	0	0	0	0	0									655	0	0	0	0	0	0	0	0	0	0	0	0	0	0	0	0	0	0	0
	656	0	0	0	0	0	0	0	0	0	0	0	0	0	0	0	0	0	0	0	0									656	0	0	0	0	0	0	0	0	0	0	0	0	0	0	0	0	0	0	0
	657	0	0	0	0	0	0	0	0	0	0	0	0	0	0	0	0	0	0	0	0									657	0	0	0	0	0	0	0	0	0	0	0	0	0	0	0	0	0	0	0
	658	0	0	0	0	0	0	0	0	0	0	0	0	0	0	0	0	0	0	0	0									658	0	0	0	0	0	0	0	0	0	0	0	0	0	0	0	0	0	0	0
	659	0	0	0	0	0	0	0	0	0	0	0	0	0	0	0	0	0	0	0	0									659	0	0	0	0	0	0	0	0	0	0	0	0	0	0	0	0	0	0	0
	660	0	0	0	0	0	0	0	0	0	0	0	0	0	0	0	0	0	0	0	0									660	0	0	0	0	0	0	0	0	0	0	0	0	0	0	0	0	0	0	0
	661	0	0	0	0	0	0	0	0	0	0	0	0	0	0	0	0	0	0	0	0									661	0	0	0	0	0	0	0	0	0	0	0	0	0	0	0	0	0	0	0
	662	0	0	0	0	0	0	0	0	0	0	0	0	0	0	0	0	0	0	0	0									662	0	0	0	0	0	0	0	0	0	0	0	0	0	0	0	0	0	0	0
	663	0	0	0	0	0	0	0	0	0	0	0	0	0	0	0	0	0	0	0	0									663	0	0	0	0	0	0	0	0	0	0	0	0	0	0	0	0	0	0	0
	664	0	0	0	0	0	0	0	0	0	0	0	0	0	0	0	0	0	0	0	0									664	0	0	0	0	0	0	0	0	0	0	0	0	0	0	0	0	0	0	0
	665	0	0	0	0	0	0	0	0	0	0	0	0	0	0	0	0	0	0	0	0									665	0	0	0	0	0	0	0	0	0	0	0	0	0	0	0	0	0	0	0
	666	0	0	0	0	0	0	0	0	0	0	0	0	0	0	0	0	0	0	0	0									666	0	0	0	0	0	0	0	0	0	0	0	0	0	0	0	0	0	0	0
	667	0	0	0	0	0	0	0	0	0	0	0	0	0	0	0	0	0	0	0	0									667	0	0	0	0	0	0	0	0	0	0	0	0	0	0	0	0	0	0	0
	668	0	0	0	0	0	0	0	0	0	0	0	0	0	0	0	0	0	0	0	0									668	0	0	0	0	0	0	0	0	0	0	0	0	0	0	0	0	0	0	0
	669	0	0	0	0	0	0	0	0	0	0	0	0	0	0	0	0	0	0	0	0									669	0	0	0	0	0	0	0	0	0	0	0	0	0	0	0	0	0	0	0
	670	0	0	0	0	0	0	0	0	0	0	0	0	0	0	0	0	0	0	0	0									670	0	0	0	0	0	0	0	0	0	0	0	0	0	0	0	0	0	0	0
	671	0	0	0	0	0	0	0	0	0	0	0	0	0	0	0	0	0	0	0	0									671	0	0	0	0	0	0	0	0	0	0	0	0	0	0	0	0	0	0	0
	672	0	0	0	0	0	0	0	0	0	0	0	0	0	0	0	0	0	0	0	0									672	0	0	0	0	0	0	0	0	0	0	0	0	0	0	0	0	0	0	0
	673	0	0	0	0	0	0	0	0	0	0	0	0	0	0	0	0	0	0	0	0									673	0	0	0	0	0	0	0	0	0	0	0	0	0	0	0	0	0	0	0
	674	0	0	0	0	0	0	0	0	0	0	0	0	0	0	0	0	0	0	0	0									674	0	0	0	0	0	0	0	0	0	0	0	0	0	0	0	0	0	0	0
	675	0	0	0	0	0	0	0	0	0	0	0	0	0	0	0	0	0	0	0	0									675	0	0	0	0	0	0	0	0	0	0	0	0	0	0	0	0	0	0	0
	676	0	0	0	0	0	0	0	0	0	0	0	0	0	0	0	0	0	0	0	0									676	0	0	0	0	0	0	0	0	0	0	0	0	0	0	0	0	0	0	0
	677	0	0	0	0	0	0	0	0	0	0	0	0	0	0	0	0	0	0	0	0									677	0	0	0	0	0	0	0	0	0	0	0	0	0	0	0	0	0	0	0
	678	0	0	0	0	0	0	0	0	0	0	0	0	0	0	0	0	0	0	0	0									678	0	0	0	0	0	0	0	0	0	0	0	0	0	0	0	0	0	0	0
	679	0	0	0	0	0	0	0	0	0	0	0	0	0	0	0	0	0	0	0	0									679	0	0	0	0	0	0	0	0	0	0	0	0	0	0	0	0	0	0	0
	680	0	0	0	0	0	0	0	0	0	0	0	0	0	0	0	0	0	0	0	0									680	0	0	0	0	0	0	0	0	0	0	0	0	0	0	0	0	0	0	0
	681	0	0	0	0	0	0	0	0	0	0	0	0	0	0	0	0	0	0	0	0									681	0	0	0	0	0	0	0	0	0	0	0	0	0	0	0	0	0	0	0
	682	0	0	0	0	0	0	0	0	0	0	0	0	0	0	0	0	0	0	0	0									682	0	0	0	0	0	0	0	0	0	0	0	0	0	0	0	0	0	0	0
	683	0	0	0	0	0	0	0	0	0	0	0	0	0	0	0	0	0	0	0	0									683	0	0	0	0	0	0	0	0	0	0	0	0	0	0	0	0	0	0	0
	684	0	0	0	0	0	0	0	0	0	0	0	0	0	0	0	0	0	0	0	0									684	0	0	0	0	0	0	0	0	0	0	0	0	0	0	0	0	0	0	0
	685	0	0	0	0	0	0	0	0	0	0	0	0	0	0	0	0	0	0	0	0									685	0	0	0	0	0	0	0	0	0	0	0	0	0	0	0	0	0	0	0
	686	0	0	0	0	0	0	0	0	0	0	0	0	0	0	0	0	0	0	0	0									686	0	0	0	0	0	0	0	0	0	0	0	0	0	0	0	0	0	0	0
	687	0	0	0	0	0	0	0	0	0	0	0	0	0	0	0	0	0	0	0	0									687	0	0	0	0	0	0	0	0	0	0	0	0	0	0	0	0	0	0	0
	688	0	0	0	0	0	0	0	0	0	0	0	0	0	0	0	0	0	0	0	0									688	0	0	0	0	0	0	0	0	0	0	0	0	0	0	0	0	0	0	0
	689	0	0	0	0	0	0	0	0	0	0	0	0	0	0	0	0	0	0	0	0									689	0	0	0	0	0	0	0	0	0	0	0	0	0	0	0	0	0	0	0
	690	0	0	0	0	0	0	0	0	0	0	0	0	0	0	0	0	0	0	0	0									690	0	0	0	0	0	0	0	0	0	0	0	0	0	0	0	0	0	0	0
	691	0	0	0	0	0	0	0	0	0	0	0	0	0	0	0	0	0	0	0	0									691	0	0	0	0	0	0	0	0	0	0	0	0	0	0	0	0	0	0	0
	692	0	0	0	0	0	0	0	0	0	0	0	0	0	0	0	0	0	0	0	0									692	0	0	0	0	0	0	0	0	0	0	0	0	0	0	0	0	0	0	0
	693	0	0	0	0	0	0	0	0	0	0	0	0	0	0	0	0	0	0	0	0									693	0	0	0	0	0	0	0	0	0	0	0	0	0	0	0	0	0	0	0
	694	0	0	0	0	0	0	0	0	0	0	0	0	0	0	0	0	0	0	0	0									694	0	0	0	0	0	0	0	0	0	0	0	0	0	0	0	0	0	0	0
	695	0	0	0	0	0	0	0	0	0	0	0	0	0	0	0	0	0	0	0	0									695	0	0	0	0	0	0	0	0	0	0	0	0	0	0	0	0	0	0	0
	696	0	0	0	0	0	0	0	0	0	0	0	0	0	0	0	0	0	0	0	0									696	0	0	0	0	0	0	0	0	0	0	0	0	0	0	0	0	0	0	0
	697	0	0	0	0	0	0	0	0	0	0	0	0	0	0	0	0	0	0	0	0									697	0	0	0	0	0	0	0	0	0	0	0	0	0	0	0	0	0	0	0
	698	0	0	0	0	0	0	0	0	0	0	0	0	0	0	0	0	0	0	0	0									698	0	0	0	0	0	0	0	0	0	0	0	0	0	0	0	0	0	0	0
	699	0	0	0	0	0	0	0	0	0	0	0	0	0	0	0	0	0	0	0	0									699	0	0	0	0	0	0	0	0	0	0	0	0	0	0	0	0	0	0	0
	700	0	0	0	0	0	0	0	0	0	0	0	0	0	0	0	0	0	0	0	0									700	0	0	0	0	0	0	0	0	0	0	0	0	0	0	0	0	0	0	0
	701	0	0	0	0	0	0	0	0	0	0	0	0	0	0	0	0	0	0	0	0									701	0	0	0	0	0	0	0	0	0	0	0	0	0	0	0	0	0	0	0
	702	0	0	0	0	0	0	0	0	0	0	0	0	0	0	0	0	0	0	0	0									702	0	0	0	0	0	0	0	0	0	0	0	0	0	0	0	0	0	0	0
	703	0	0	0	0	0	0	0	0	0	0	0	0	0	0	0	0	0	0	0	0									703	0	0	0	0	0	0	0	0	0	0	0	0	0	0	0	0	0	0	0
	704	0	0	0	0	0	0	0	0	0	0	0	0	0	0	0	0	0	0	0	0									704	0	0	0	0	0	0	0	0	0	0	0	0	0	0	0	0	0	0	0
	705	0	0	0	0	0	0	0	0	0	0	0	0	0	0	0	0	0	0	0	0									705	0	0	0	0	0	0	0	0	0	0	0	0	0	0	0	0	0	0	0
	706	0	0	0	0	0	0	0	0	0	0	0	0	0	0	0	0	0	0	0	0									706	0	0	0	0	0	0	0	0	0	0	0	0	0	0	0	0	0	0	0
	707	0	0	0	0	0	0	0	0	0	0	0	0	0	0	0	0	0	0	0	0									707	0	0	0	0	0	0	0	0	0	0	0	0	0	0	0	0	0	0	0
	708	0	0	0	0	0	0	0	0	0	0	0	0	0	0	0	0	0	0	0	0									708	0	0	0	0	0	0	0	0	0	0	0	0	0	0	0	0	0	0	0
	709	0	0	0	0	0	0	0	0	0	0	0	0	0	0	0	0	0	0	0	0									709	0	0	0	0	0	0	0	0	0	0	0	0	0	0	0	0	0	0	0
	710	0	0	0	0	0	0	0	0	0	0	0	0	0	0	0	0	0	0	0	0									710	0	0	0	0	0	0	0	0	0	0	0	0	0	0	0	0	0	0	0
	711	0	0	0	0	0	0	0	0	0	0	0	0	0	0	0	0	0	0	0	0									711	0	0	0	0	0	0	0	0	0	0	0	0	0	0	0	0	0	0	0
	712	0	0	0	0	0	0	0	0	0	0	0	0	0	0	0	0	0	0	0	0									712	0	0	0	0	0	0	0	0	0	0	0	0	0	0	0	0	0	0	0
	713	0	0	0	0	0	0	0	0	0	0	0	0	0	0	0	0	0	0	0	0									713	0	0	0	0	0	0	0	0	0	0	0	0	0	0	0	0	0	0	0
	714	0	0	0	0	0	0	0	0	0	0	0	0	0	0	0	0	0	0	0	0									714	0	0	0	0	0	0	0	0	0	0	0	0	0	0	0	0	0	0	0
	715	0	0	0	0	0	0	0	0	0	0	0	0	0	0	0	0	0	0	0	0									715	0	0	0	0	0	0	0	0	0	0	0	0	0	0	0	0	0	0	0
	716	0	0	0	0	0	0	0	0	0	0	0	0	0	0	0	0	0	0	0	0									716	0	0	0	0	0	0	0	0	0	0	0	0	0	0	0	0	0	0	0
	717	0	0	0	0	0	0	0	0	0	0	0	0	0	0	0	0	0	0	0	0									717	0	0	0	0	0	0	0	0	0	0	0	0	0	0	0	0	0	0	0
	718	0	0	0	0	0	0	0	0	0	0	0	0	0	0	0	0	0	0	0	0									718	0	0	0	0	0	0	0	0	0	0	0	0	0	0	0	0	0	0	0
	719	0	0	0	0	0	0	0	0	0	0	0	0	0	0	0	0	0	0	0	0									719	0	0	0	0	0	0	0	0	0	0	0	0	0	0	0	0	0	0	0
	720	0	0	0	0	0	0	0	0	0	0	0	0	0	0	0	0	0	0	0	0									720	0	0	0	0	0	0	0	0	0	0	0	0	0	0	0	0	0	0	0
	721	0	0	0	0	0	0	0	0	0	0	0	0	0	0	0	0	0	0	0	0									721	0	0	0	0	0	0	0	0	0	0	0	0	0	0	0	0	0	0	0
	722	0	0	0	0	0	0	0	0	0	0	0	0	0	0	0	0	0	0	0	0									722	0	0	0	0	0	0	0	0	0	0	0	0	0	0	0	0	0	0	0
	723	0	0	0	0	0	0	0	0	0	0	0	0	0	0	0	0	0	0	0	0									723	0	0	0	0	0	0	0	0	0	0	0	0	0	0	0	0	0	0	0
	724	0	0	0	0	0	0	0	0	0	0	0	0	0	0	0	0	0	0	0	0									724	0	0	0	0	0	0	0	0	0	0	0	0	0	0	0	0	0	0	0
	725	0	0	0	0	0	0	0	0	0	0	0	0	0	0	0	0	0	0	0	0									725	0	0	0	0	0	0	0	0	0	0	0	0	0	0	0	0	0	0	0
	726	0	0	0	0	0	0	0	0	0	0	0	0	0	0	0	0	0	0	0	0									726	0	0	0	0	0	0	0	0	0	0	0	0	0	0	0	0	0	0	0
	727	0	0	0	0	0	0	0	0	0	0	0	0	0	0	0	0	0	0	0	0									727	0	0	0	0	0	0	0	0	0	0	0	0	0	0	0	0	0	0	0
	728	0	0	0	0	0	0	0	0	0	0	0	0	0	0	0	0	0	0	0	0									728	0	0	0	0	0	0	0	0	0	0	0	0	0	0	0	0	0	0	0
	729	0	0	0	0	0	0	0	0	0	0	0	0	0	0	0	0	0	0	0	0									729	0	0	0	0	0	0	0	0	0	0	0	0	0	0	0	0	0	0	0
	730	0	0	0	0	0	0	0	0	0	0	0	0	0	0	0	0	0	0	0	0									730	0	0	0	0	0	0	0	0	0	0	0	0	0	0	0	0	0	0	0
	731	0	0	0	0	0	0	0	0	0	0	0	0	0	0	0	0	0	0	0	0									731	0	0	0	0	0	0	0	0	0	0	0	0	0	0	0	0	0	0	0
	732	0	0	0	0	0	0	0	0	0	0	0	0	0	0	0	0	0	0	0	0									732	0	0	0	0	0	0	0	0	0	0	0	0	0	0	0	0	0	0	0
	733	0	0	0	0	0	0	0	0	0	0	0	0	0	0	0	0	0	0	0	0									733	0	0	0	0	0	0	0	0	0	0	0	0	0	0	0	0	0	0	0
	734	0	0	0	0	0	0	0	0	0	0	0	0	0	0	0	0	0	0	0	0									734	0	0	0	0	0	0	0	0	0	0	0	0	0	0	0	0	0	0	0
	735	0	0	0	0	0	0	0	0	0	0	0	0	0	0	0	0	0	0	0	0									735	0	0	0	0	0	0	0	0	0	0	0	0	0	0	0	0	0	0	0
	736	0	0	0	0	0	0	0	0	0	0	0	0	0	0	0	0	0	0	0	0									736	0	0	0	0	0	0	0	0	0	0	0	0	0	0	0	0	0	0	0
	737	0	0	0	0	0	0	0	0	0	0	0	0	0	0	0	0	0	0	0	0									737	0	0	0	0	0	0	0	0	0	0	0	0	0	0	0	0	0	0	0
	738	0	0	0	0	0	0	0	0	0	0	0	0	0	0	0	0	0	0	0	0									738	0	0	0	0	0	0	0	0	0	0	0	0	0	0	0	0	0	0	0
	739	0	0	0	0	0	0	0	0	0	0	0	0	0	0	0	0	0	0	0	0									739	0	0	0	0	0	0	0	0	0	0	0	0	0	0	0	0	0	0	0
	740	0	0	0	0	0	0	0	0	0	0	0	0	0	0	0	0	0	0	0	0									740	0	0	0	0	0	0	0	0	0	0	0	0	0	0	0	0	0	0	0
	741	0	0	0	0	0	0	0	0	0	0	0	0	0	0	0	0	0	0	0	0									741	0	0	0	0	0	0	0	0	0	0	0	0	0	0	0	0	0	0	0
	742	0	0	0	0	0	0	0	0	0	0	0	0	0	0	0	0	0	0	0	0									742	0	0	0	0	0	0	0	0	0	0	0	0	0	0	0	0	0	0	0
	743	0	0	0	0	0	0	0	0	0	0	0	0	0	0	0	0	0	0	0	0									743	0	0	0	0	0	0	0	0	0	0	0	0	0	0	0	0	0	0	0
	744	0	0	0	0	0	0	0	0	0	0	0	0	0	0	0	0	0	0	0	0									744	0	0	0	0	0	0	0	0	0	0	0	0	0	0	0	0	0	0	0
	745	0	0	0	0	0	0	0	0	0	0	0	0	0	0	0	0	0	0	0	0									745	0	0	0	0	0	0	0	0	0	0	0	0	0	0	0	0	0	0	0
	746	0	0	0	0	0	0	0	0	0	0	0	0	0	0	0	0	0	0	0	0									746	0	0	0	0	0	0	0	0	0	0	0	0	0	0	0	0	0	0	0
	747	0	0	0	0	0	0	0	0	0	0	0	0	0	0	0	0	0	0	0	0									747	0	0	0	0	0	0	0	0	0	0	0	0	0	0	0	0	0	0	0
	748	0	0	0	0	0	0	0	0	0	0	0	0	0	0	0	0	0	0	0	0									748	0	0	0	0	0	0	0	0	0	0	0	0	0	0	0	0	0	0	0
	749	0	0	0	0	0	0	0	0	0	0	0	0	0	0	0	0	0	0	0	0									749	0	0	0	0	0	0	0	0	0	0	0	0	0	0	0	0	0	0	0
	750	0	0	0	0	0	0	0	0	0	0	0	0	0	0	0	0	0	0	0	0									750	0	0	0	0	0	0	0	0	0	0	0	0	0	0	0	0	0	0	0
	751	0	0	0	0	0	0	0	0	0	0	0	0	0	0	0	0	0	0	0	0									751	0	0	0	0	0	0	0	0	0	0	0	0	0	0	0	0	0	0	0
	752	0	0	0	0	0	0	0	0	0	0	0	0	0	0	0	0	0	0	0	0									752	0	0	0	0	0	0	0	0	0	0	0	0	0	0	0	0	0	0	0
	753	0	0	0	0	0	0	0	0	0	0	0	0	0	0	0	0	0	0	0	0									753	0	0	0	0	0	0	0	0	0	0	0	0	0	0	0	0	0	0	0
	754	0	0	0	0	0	0	0	0	0	0	0	0	0	0	0	0	0	0	0	0									754	0	0	0	0	0	0	0	0	0	0	0	0	0	0	0	0	0	0	0
	755	0	0	0	0	0	0	0	0	0	0	0	0	0	0	0	0	0	0	0	0									755	0	0	0	0	0	0	0	0	0	0	0	0	0	0	0	0	0	0	0
	756	0	0	0	0	0	0	0	0	0	0	0	0	0	0	0	0	0	0	0	0									756	0	0	0	0	0	0	0	0	0	0	0	0	0	0	0	0	0	0	0
	757	0	0	0	0	0	0	0	0	0	0	0	0	0	0	0	0	0	0	0	0									757	0	0	0	0	0	0	0	0	0	0	0	0	0	0	0	0	0	0	0
	758	0	0	0	0	0	0	0	0	0	0	0	0	0	0	0	0	0	0	0	0									758	0	0	0	0	0	0	0	0	0	0	0	0	0	0	0	0	0	0	0
	759	0	0	0	0	0	0	0	0	0	0	0	0	0	0	0	0	0	0	0	0									759	0	0	0	0	0	0	0	0	0	0	0	0	0	0	0	0	0	0	0
	760	0	0	0	0	0	0	0	0	0	0	0	0	0	0	0	0	0	0	0	0									760	0	0	0	0	0	0	0	0	0	0	0	0	0	0	0	0	0	0	0
	761	0	0	0	0	0	0	0	0	0	0	0	0	0	0	0	0	0	0	0	0									761	0	0	0	0	0	0	0	0	0	0	0	0	0	0	0	0	0	0	0
	762	0	0	0	0	0	0	0	0	0	0	0	0	0	0	0	0	0	0	0	0									762	0	0	0	0	0	0	0	0	0	0	0	0	0	0	0	0	0	0	0
	763	0	0	0	0	0	0	0	0	0	0	0	0	0	0	0	0	0	0	0	0									763	0	0	0	0	0	0	0	0	0	0	0	0	0	0	0	0	0	0	0
	764	0	0	0	0	0	0	0	0	0	0	0	0	0	0	0	0	0	0	0	0									764	0	0	0	0	0	0	0	0	0	0	0	0	0	0	0	0	0	0	0
	765	0	0	0	0	0	0	0	0	0	0	0	0	0	0	0	0	0	0	0	0									765	0	0	0	0	0	0	0	0	0	0	0	0	0	0	0	0	0	0	0
	766	0	0	0	0	0	0	0	0	0	0	0	0	0	0	0	0	0	0	0	0									766	0	0	0	0	0	0	0	0	0	0	0	0	0	0	0	0	0	0	0
	767	0	0	0	0	0	0	0	0	0	0	0	0	0	0	0	0	0	0	0	0									767	0	0	0	0	0	0	0	0	0	0	0	0	0	0	0	0	0	0	0
	768	0	0	0	0	0	0	0	0	0	0	0	0	0	0	0	0	0	0	0	0									768	0	0	0	0	0	0	0	0	0	0	0	0	0	0	0	0	0	0	0
	769	0	0	0	0	0	0	0	0	0	0	0	0	0	0	0	0	0	0	0	0									769	0	0	0	0	0	0	0	0	0	0	0	0	0	0	0	0	0	0	0
	770	0	0	0	0	0	0	0	0	0	0	0	0	0	0	0	0	0	0	0	0									770	0	0	0	0	0	0	0	0	0	0	0	0	0	0	0	0	0	0	0
	771	0	0	0	0	0	0	0	0	0	0	0	0	0	0	0	0	0	0	0	0									771	0	0	0	0	0	0	0	0	0	0	0	0	0	0	0	0	0	0	0
	772	0	0	0	0	0	0	0	0	0	0	0	0	0	0	0	0	0	0	0	0									772	0	0	0	0	0	0	0	0	0	0	0	0	0	0	0	0	0	0	0
	773	0	0	0	0	0	0	0	0	0	0	0	0	0	0	0	0	0	0	0	0									773	0	0	0	0	0	0	0	0	0	0	0	0	0	0	0	0	0	0	0
	774	0	0	0	0	0	0	0	0	0	0	0	0	0	0	0	0	0	0	0	0									774	0	0	0	0	0	0	0	0	0	0	0	0	0	0	0	0	0	0	0
	775	0	0	0	0	0	0	0	0	0	0	0	0	0	0	0	0	0	0	0	0									775	0	0	0	0	0	0	0	0	0	0	0	0	0	0	0	0	0	0	0
	776	0	0	0	0	0	0	0	0	0	0	0	0	0	0	0	0	0	0	0	0									776	0	0	0	0	0	0	0	0	0	0	0	0	0	0	0	0	0	0	0
	777	0	0	0	0	0	0	0	0	0	0	0	0	0	0	0	0	0	0	0	0									777	0	0	0	0	0	0	0	0	0	0	0	0	0	0	0	0	0	0	0
	778	0	0	0	0	0	0	0	0	0	0	0	0	0	0	0	0	0	0	0	0									778	0	0	0	0	0	0	0	0	0	0	0	0	0	0	0	0	0	0	0
	779	0	0	0	0	0	0	0	0	0	0	0	0	0	0	0	0	0	0	0	0									779	0	0	0	0	0	0	0	0	0	0	0	0	0	0	0	0	0	0	0
	780	0	0	0	0	0	0	0	0	0	0	0	0	0	0	0	0	0	0	0	0									780	0	0	0	0	0	0	0	0	0	0	0	0	0	0	0	0	0	0	0
	781	0	0	0	0	0	0	0	0	0	0	0	0	0	0	0	0	0	0	0	0									781	0	0	0	0	0	0	0	0	0	0	0	0	0	0	0	0	0	0	0
	782	0	0	0	0	0	0	0	0	0	0	0	0	0	0	0	0	0	0	0	0									782	0	0	0	0	0	0	0	0	0	0	0	0	0	0	0	0	0	0	0
	783	0	0	0	0	0	0	0	0	0	0	0	0	0	0	0	0	0	0	0	0									783	0	0	0	0	0	0	0	0	0	0	0	0	0	0	0	0	0	0	0
	784	0	0	0	0	0	0	0	0	0	0	0	0	0	0	0	0	0	0	0	0									784	0	0	0	0	0	0	0	0	0	0	0	0	0	0	0	0	0	0	0
	785	0	0	0	0	0	0	0	0	0	0	0	0	0	0	0	0	0	0	0	0									785	0	0	0	0	0	0	0	0	0	0	0	0	0	0	0	0	0	0	0
	786	0	0	0	0	0	0	0	0	0	0	0	0	0	0	0	0	0	0	0	0									786	0	0	0	0	0	0	0	0	0	0	0	0	0	0	0	0	0	0	0
	787	0	0	0	0	0	0	0	0	0	0	0	0	0	0	0	0	0	0	0	0									787	0	0	0	0	0	0	0	0	0	0	0	0	0	0	0	0	0	0	0
	788	0	0	0	0	0	0	0	0	0	0	0	0	0	0	0	0	0	0	0	0									788	0	0	0	0	0	0	0	0	0	0	0	0	0	0	0	0	0	0	0
	789	0	0	0	0	0	0	0	0	0	0	0	0	0	0	0	0	0	0	0	0									789	0	0	0	0	0	0	0	0	0	0	0	0	0	0	0	0	0	0	0
	790	0	0	0	0	0	0	0	0	0	0	0	0	0	0	0	0	0	0	0	0									790	0	0	0	0	0	0	0	0	0	0	0	0	0	0	0	0	0	0	0
	791	0	0	0	0	0	0	0	0	0	0	0	0	0	0	0	0	0	0	0	0									791	0	0	0	0	0	0	0	0	0	0	0	0	0	0	0	0	0	0	0
	792	0	0	0	0	0	0	0	0	0	0	0	0	0	0	0	0	0	0	0	0									792	0	0	0	0	0	0	0	0	0	0	0	0	0	0	0	0	0	0	0
	793	0	0	0	0	0	0	0	0	0	0	0	0	0	0	0	0	0	0	0	0									793	0	0	0	0	0	0	0	0	0	0	0	0	0	0	0	0	0	0	0
	794	0	0	0	0	0	0	0	0	0	0	0	0	0	0	0	0	0	0	0	0									794	0	0	0	0	0	0	0	0	0	0	0	0	0	0	0	0	0	0	0
	795	0	0	0	0	0	0	0	0	0	0	0	0	0	0	0	0	0	0	0	0									795	0	0	0	0	0	0	0	0	0	0	0	0	0	0	0	0	0	0	0
	796	0	0	0	0	0	0	0	0	0	0	0	0	0	0	0	0	0	0	0	0									796	0	0	0	0	0	0	0	0	0	0	0	0	0	0	0	0	0	0	0
	797	0	0	0	0	0	0	0	0	0	0	0	0	0	0	0	0	0	0	0	0									797	0	0	0	0	0	0	0	0	0	0	0	0	0	0	0	0	0	0	0
	798	0	0	0	0	0	0	0	0	0	0	0	0	0	0	0	0	0	0	0	0									798	0	0	0	0	0	0	0	0	0	0	0	0	0	0	0	0	0	0	0
	799	0	0	0	0	0	0	0	0	0	0	0	0	0	0	0	0	0	0	0	0									799	0	0	0	0	0	0	0	0	0	0	0	0	0	0	0	0	0	0	0
	800	0	0	0	0	0	0	0	0	0	0	0	0	0	0	0	0	0	0	0	0									800	0	0	0	0	0	0	0	0	0	0	0	0	0	0	0	0	0	0	0
	801	0	0	0	0	0	0	0	0	0	0	0	0	0	0	0	0	0	0	0	0									801	0	0	0	0	0	0	0	0	0	0	0	0	0	0	0	0	0	0	0
	802	0	0	0	0	0	0	0	0	0	0	0	0	0	0	0	0	0	0	0	0									802	0	0	0	0	0	0	0	0	0	0	0	0	0	0	0	0	0	0	0
	803	0	0	0	0	0	0	0	0	0	0	0	0	0	0	0	0	0	0	0	0									803	0	0	0	0	0	0	0	0	0	0	0	0	0	0	0	0	0	0	0
	804	0	0	0	0	0	0	0	0	0	0	0	0	0	0	0	0	0	0	0	0									804	0	0	0	0	0	0	0	0	0	0	0	0	0	0	0	0	0	0	0
	805	0	0	0	0	0	0	0	0	0	0	0	0	0	0	0	0	0	0	0	0									805	0	0	0	0	0	0	0	0	0	0	0	0	0	0	0	0	0	0	0
	806	0	0	0	0	0	0	0	0	0	0	0	0	0	0	0	0	0	0	0	0									806	0	0	0	0	0	0	0	0	0	0	0	0	0	0	0	0	0	0	0
	807	0	0	0	0	0	0	0	0	0	0	0	0	0	0	0	0	0	0	0	0									807	0	0	0	0	0	0	0	0	0	0	0	0	0	0	0	0	0	0	0
	808	0	0	0	0	0	0	0	0	0	0	0	0	0	0	0	0	0	0	0	0									808	0	0	0	0	0	0	0	0	0	0	0	0	0	0	0	0	0	0	0
	809	0	0	0	0	0	0	0	0	0	0	0	0	0	0	0	0	0	0	0	0									809	0	0	0	0	0	0	0	0	0	0	0	0	0	0	0	0	0	0	0
	810	0	0	0	0	0	0	0	0	0	0	0	0	0	0	0	0	0	0	0	0									810	0	0	0	0	0	0	0	0	0	0	0	0	0	0	0	0	0	0	0
	811	0	0	0	0	0	0	0	0	0	0	0	0	0	0	0	0	0	0	0	0									811	0	0	0	0	0	0	0	0	0	0	0	0	0	0	0	0	0	0	0
	812	0	0	0	0	0	0	0	0	0	0	0	0	0	0	0	0	0	0	0	0									812	0	0	0	0	0	0	0	0	0	0	0	0	0	0	0	0	0	0	0
	813	0	0	0	0	0	0	0	0	0	0	0	0	0	0	0	0	0	0	0	0									813	0	0	0	0	0	0	0	0	0	0	0	0	0	0	0	0	0	0	0
	814	0	0	0	0	0	0	0	0	0	0	0	0	0	0	0	0	0	0	0	0									814	0	0	0	0	0	0	0	0	0	0	0	0	0	0	0	0	0	0	0
	815	0	0	0	0	0	0	0	0	0	0	0	0	0	0	0	0	0	0	0	0									815	0	0	0	0	0	0	0	0	0	0	0	0	0	0	0	0	0	0	0
	816	0	0	0	0	0	0	0	0	0	0	0	0	0	0	0	0	0	0	0	0									816	0	0	0	0	0	0	0	0	0	0	0	0	0	0	0	0	0	0	0
	817	0	0	0	0	0	0	0	0	0	0	0	0	0	0	0	0	0	0	0	0									817	0	0	0	0	0	0	0	0	0	0	0	0	0	0	0	0	0	0	0
	818	0	0	0	0	0	0	0	0	0	0	0	0	0	0	0	0	0	0	0	0									818	0	0	0	0	0	0	0	0	0	0	0	0	0	0	0	0	0	0	0
	819	0	0	0	0	0	0	0	0	0	0	0	0	0	0	0	0	0	0	0	0									819	0	0	0	0	0	0	0	0	0	0	0	0	0	0	0	0	0	0	0
	820	0	0	0	0	0	0	0	0	0	0	0	0	0	0	0	0	0	0	0	0									820	0	0	0	0	0	0	0	0	0	0	0	0	0	0	0	0	0	0	0
	821	0	0	0	0	0	0	0	0	0	0	0	0	0	0	0	0	0	0	0	0									821	0	0	0	0	0	0	0	0	0	0	0	0	0	0	0	0	0	0	0
	822	0	0	0	0	0	0	0	0	0	0	0	0	0	0	0	0	0	0	0	0									822	0	0	0	0	0	0	0	0	0	0	0	0	0	0	0	0	0	0	0
	823	0	0	0	0	0	0	0	0	0	0	0	0	0	0	0	0	0	0	0	0									823	0	0	0	0	0	0	0	0	0	0	0	0	0	0	0	0	0	0	0
	824	0	0	0	0	0	0	0	0	0	0	0	0	0	0	0	0	0	0	0	0									824	0	0	0	0	0	0	0	0	0	0	0	0	0	0	0	0	0	0	0
	825	0	0	0	0	0	0	0	0	0	0	0	0	0	0	0	0	0	0	0	0									825	0	0	0	0	0	0	0	0	0	0	0	0	0	0	0	0	0	0	0
	826	0	0	0	0	0	0	0	0	0	0	0	0	0	0	0	0	0	0	0	0									826	0	0	0	0	0	0	0	0	0	0	0	0	0	0	0	0	0	0	0
	827	0	0	0	0	0	0	0	0	0	0	0	0	0	0	0	0	0	0	0	0									827	0	0	0	0	0	0	0	0	0	0	0	0	0	0	0	0	0	0	0
	828	0	0	0	0	0	0	0	0	0	0	0	0	0	0	0	0	0	0	0	0									828	0	0	0	0	0	0	0	0	0	0	0	0	0	0	0	0	0	0	0
	829	0	0	0	0	0	0	0	0	0	0	0	0	0	0	0	0	0	0	0	0									829	0	0	0	0	0	0	0	0	0	0	0	0	0	0	0	0	0	0	0
	830	0	0	0	0	0	0	0	0	0	0	0	0	0	0	0	0	0	0	0	0									830	0	0	0	0	0	0	0	0	0	0	0	0	0	0	0	0	0	0	0
	831	0	0	0	0	0	0	0	0	0	0	0	0	0	0	0	0	0	0	0	0									831	0	0	0	0	0	0	0	0	0	0	0	0	0	0	0	0	0	0	0
	832	0	0	0	0	0	0	0	0	0	0	0	0	0	0	0	0	0	0	0	0									832	0	0	0	0	0	0	0	0	0	0	0	0	0	0	0	0	0	0	0
	833	0	0	0	0	0	0	0	0	0	0	0	0	0	0	0	0	0	0	0	0									833	0	0	0	0	0	0	0	0	0	0	0	0	0	0	0	0	0	0	0
	834	0	0	0	0	0	0	0	0	0	0	0	0	0	0	0	0	0	0	0	0									834	0	0	0	0	0	0	0	0	0	0	0	0	0	0	0	0	0	0	0
	835	0	0	0	0	0	0	0	0	0	0	0	0	0	0	0	0	0	0	0	0									835	0	0	0	0	0	0	0	0	0	0	0	0	0	0	0	0	0	0	0
	836	0	0	0	0	0	0	0	0	0	0	0	0	0	0	0	0	0	0	0	0									836	0	0	0	0	0	0	0	0	0	0	0	0	0	0	0	0	0	0	0
	837	0	0	0	0	0	0	0	0	0	0	0	0	0	0	0	0	0	0	0	0									837	0	0	0	0	0	0	0	0	0	0	0	0	0	0	0	0	0	0	0
	838	0	0	0	0	0	0	0	0	0	0	0	0	0	0	0	0	0	0	0	0									838	0	0	0	0	0	0	0	0	0	0	0	0	0	0	0	0	0	0	0
	839	0	0	0	0	0	0	0	0	0	0	0	0	0	0	0	0	0	0	0	0									839	0	0	0	0	0	0	0	0	0	0	0	0	0	0	0	0	0	0	0
	840	0	0	0	0	0	0	0	0	0	0	0	0	0	0	0	0	0	0	0	0									840	0	0	0	0	0	0	0	0	0	0	0	0	0	0	0	0	0	0	0
	841	0	0	0	0	0	0	0	0	0	0	0	0	0	0	0	0	0	0	0	0									841	0	0	0	0	0	0	0	0	0	0	0	0	0	0	0	0	0	0	0
	842	0	0	0	0	0	0	0	0	0	0	0	0	0	0	0	0	0	0	0	0									842	0	0	0	0	0	0	0	0	0	0	0	0	0	0	0	0	0	0	0
	843	0	0	0	0	0	0	0	0	0	0	0	0	0	0	0	0	0	0	0	0									843	0	0	0	0	0	0	0	0	0	0	0	0	0	0	0	0	0	0	0
	844	0	0	0	0	0	0	0	0	0	0	0	0	0	0	0	0	0	0	0	0									844	0	0	0	0	0	0	0	0	0	0	0	0	0	0	0	0	0	0	0
	845	0	0	0	0	0	0	0	0	0	0	0	0	0	0	0	0	0	0	0	0									845	0	0	0	0	0	0	0	0	0	0	0	0	0	0	0	0	0	0	0
	846	0	0	0	0	0	0	0	0	0	0	0	0	0	0	0	0	0	0	0	0									846	0	0	0	0	0	0	0	0	0	0	0	0	0	0	0	0	0	0	0
	847	0	0	0	0	0	0	0	0	0	0	0	0	0	0	0	0	0	0	0	0									847	0	0	0	0	0	0	0	0	0	0	0	0	0	0	0	0	0	0	0
	848	0	0	0	0	0	0	0	0	0	0	0	0	0	0	0	0	0	0	0	0									848	0	0	0	0	0	0	0	0	0	0	0	0	0	0	0	0	0	0	0
	849	0	0	0	0	0	0	0	0	0	0	0	0	0	0	0	0	0	0	0	0									849	0	0	0	0	0	0	0	0	0	0	0	0	0	0	0	0	0	0	0
	850	0	0	0	0	0	0	0	0	0	0	0	0	0	0	0	0	0	0	0	0									850	0	0	0	0	0	0	0	0	0	0	0	0	0	0	0	0	0	0	0
	851	0	0	0	0	0	0	0	0	0	0	0	0	0	0	0	0	0	0	0	0									851	0	0	0	0	0	0	0	0	0	0	0	0	0	0	0	0	0	0	0
	852	0	0	0	0	0	0	0	0	0	0	0	0	0	0	0	0	0	0	0	0									852	0	0	0	0	0	0	0	0	0	0	0	0	0	0	0	0	0	0	0
	853	0	0	0	0	0	0	0	0	0	0	0	0	0	0	0	0	0	0	0	0									853	0	0	0	0	0	0	0	0	0	0	0	0	0	0	0	0	0	0	0
	854	0	0	0	0	0	0	0	0	0	0	0	0	0	0	0	0	0	0	0	0									854	0	0	0	0	0	0	0	0	0	0	0	0	0	0	0	0	0	0	0
	855	0	0	0	0	0	0	0	0	0	0	0	0	0	0	0	0	0	0	0	0									855	0	0	0	0	0	0	0	0	0	0	0	0	0	0	0	0	0	0	0
	856	0	0	0	0	0	0	0	0	0	0	0	0	0	0	0	0	0	0	0	0									856	0	0	0	0	0	0	0	0	0	0	0	0	0	0	0	0	0	0	0
	857	0	0	0	0	0	0	0	0	0	0	0	0	0	0	0	0	0	0	0	0									857	0	0	0	0	0	0	0	0	0	0	0	0	0	0	0	0	0	0	0
	858	0	0	0	0	0	0	0	0	0	0	0	0	0	0	0	0	0	0	0	0									858	0	0	0	0	0	0	0	0	0	0	0	0	0	0	0	0	0	0	0
	859	0	0	0	0	0	0	0	0	0	0	0	0	0	0	0	0	0	0	0	0									859	0	0	0	0	0	0	0	0	0	0	0	0	0	0	0	0	0	0	0
	860	0	0	0	0	0	0	0	0	0	0	0	0	0	0	0	0	0	0	0	0									860	0	0	0	0	0	0	0	0	0	0	0	0	0	0	0	0	0	0	0
	861	0	0	0	0	0	0	0	0	0	0	0	0	0	0	0	0	0	0	0	0									861	0	0	0	0	0	0	0	0	0	0	0	0	0	0	0	0	0	0	0
	862	0	0	0	0	0	0	0	0	0	0	0	0	0	0	0	0	0	0	0	0									862	0	0	0	0	0	0	0	0	0	0	0	0	0	0	0	0	0	0	0
	863	0	0	0	0	0	0	0	0	0	0	0	0	0	0	0	0	0	0	0	0									863	0	0	0	0	0	0	0	0	0	0	0	0	0	0	0	0	0	0	0
	864	0	0	0	0	0	0	0	0	0	0	0	0	0	0	0	0	0	0	0	0									864	0	0	0	0	0	0	0	0	0	0	0	0	0	0	0	0	0	0	0
	865	0	0	0	0	0	0	0	0	0	0	0	0	0	0	0	0	0	0	0	0									865	0	0	0	0	0	0	0	0	0	0	0	0	0	0	0	0	0	0	0
	866	0	0	0	0	0	0	0	0	0	0	0	0	0	0	0	0	0	0	0	0									866	0	0	0	0	0	0	0	0	0	0	0	0	0	0	0	0	0	0	0
	867	0	0	0	0	0	0	0	0	0	0	0	0	0	0	0	0	0	0	0	0									867	0	0	0	0	0	0	0	0	0	0	0	0	0	0	0	0	0	0	0
	868	0	0	0	0	0	0	0	0	0	0	0	0	0	0	0	0	0	0	0	0									868	0	0	0	0	0	0	0	0	0	0	0	0	0	0	0	0	0	0	0
	869	0	0	0	0	0	0	0	0	0	0	0	0	0	0	0	0	0	0	0	0									869	0	0	0	0	0	0	0	0	0	0	0	0	0	0	0	0	0	0	0
	870	0	0	0	0	0	0	0	0	0	0	0	0	0	0	0	0	0	0	0	0									870	0	0	0	0	0	0	0	0	0	0	0	0	0	0	0	0	0	0	0
	871	0	0	0	0	0	0	0	0	0	0	0	0	0	0	0	0	0	0	0	0									871	0	0	0	0	0	0	0	0	0	0	0	0	0	0	0	0	0	0	0
	872	0	0	0	0	0	0	0	0	0	0	0	0	0	0	0	0	0	0	0	0									872	0	0	0	0	0	0	0	0	0	0	0	0	0	0	0	0	0	0	0
	873	0	0	0	0	0	0	0	0	0	0	0	0	0	0	0	0	0	0	0	0									873	0	0	0	0	0	0	0	0	0	0	0	0	0	0	0	0	0	0	0
	874	0	0	0	0	0	0	0	0	0	0	0	0	0	0	0	0	0	0	0	0									874	0	0	0	0	0	0	0	0	0	0	0	0	0	0	0	0	0	0	0
	875	0	0	0	0	0	0	0	0	0	0	0	0	0	0	0	0	0	0	0	0									875	0	0	0	0	0	0	0	0	0	0	0	0	0	0	0	0	0	0	0
	876	0	0	0	0	0	0	0	0	0	0	0	0	0	0	0	0	0	0	0	0									876	0	0	0	0	0	0	0	0	0	0	0	0	0	0	0	0	0	0	0
	877	0	0	0	0	0	0	0	0	0	0	0	0	0	0	0	0	0	0	0	0									877	0	0	0	0	0	0	0	0	0	0	0	0	0	0	0	0	0	0	0
	878	0	0	0	0	0	0	0	0	0	0	0	0	0	0	0	0	0	0	0	0									878	0	0	0	0	0	0	0	0	0	0	0	0	0	0	0	0	0	0	0
	879	0	0	0	0	0	0	0	0	0	0	0	0	0	0	0	0	0	0	0	0									879	0	0	0	0	0	0	0	0	0	0	0	0	0	0	0	0	0	0	0
	880	0	0	0	0	0	0	0	0	0	0	0	0	0	0	0	0	0	0	0	0									880	0	0	0	0	0	0	0	0	0	0	0	0	0	0	0	0	0	0	0
	881	0	0	0	0	0	0	0	0	0	0	0	0	0	0	0	0	0	0	0	0									881	0	0	0	0	0	0	0	0	0	0	0	0	0	0	0	0	0	0	0
	882	0	0	0	0	0	0	0	0	0	0	0	0	0	0	0	0	0	0	0	0									882	0	0	0	0	0	0	0	0	0	0	0	0	0	0	0	0	0	0	0
	883	0	0	0	0	0	0	0	0	0	0	0	0	0	0	0	0	0	0	0	0									883	0	0	0	0	0	0	0	0	0	0	0	0	0	0	0	0	0	0	0
	884	0	0	0	0	0	0	0	0	0	0	0	0	0	0	0	0	0	0	0	0									884	0	0	0	0	0	0	0	0	0	0	0	0	0	0	0	0	0	0	0
	885	0	0	0	0	0	0	0	0	0	0	0	0	0	0	0	0	0	0	0	0									885	0	0	0	0	0	0	0	0	0	0	0	0	0	0	0	0	0	0	0
	886	0	0	0	0	0	0	0	0	0	0	0	0	0	0	0	0	0	0	0	0									886	0	0	0	0	0	0	0	0	0	0	0	0	0	0	0	0	0	0	0
	887	0	0	0	0	0	0	0	0	0	0	0	0	0	0	0	0	0	0	0	0									887	0	0	0	0	0	0	0	0	0	0	0	0	0	0	0	0	0	0	0
	888	0	0	0	0	0	0	0	0	0	0	0	0	0	0	0	0	0	0	0	0									888	0	0	0	0	0	0	0	0	0	0	0	0	0	0	0	0	0	0	0
	889	0	0	0	0	0	0	0	0	0	0	0	0	0	0	0	0	0	0	0	0									889	0	0	0	0	0	0	0	0	0	0	0	0	0	0	0	0	0	0	0
	890	0	0	0	0	0	0	0	0	0	0	0	0	0	0	0	0	0	0	0	0									890	0	0	0	0	0	0	0	0	0	0	0	0	0	0	0	0	0	0	0
	891	0	0	0	0	0	0	0	0	0	0	0	0	0	0	0	0	0	0	0	0									891	0	0	0	0	0	0	0	0	0	0	0	0	0	0	0	0	0	0	0
	892	0	0	0	0	0	0	0	0	0	0	0	0	0	0	0	0	0	0	0	0									892	0	0	0	0	0	0	0	0	0	0	0	0	0	0	0	0	0	0	0
	893	0	0	0	0	0	0	0	0	0	0	0	0	0	0	0	0	0	0	0	0									893	0	0	0	0	0	0	0	0	0	0	0	0	0	0	0	0	0	0	0
	894	0	0	0	0	0	0	0	0	0	0	0	0	0	0	0	0	0	0	0	0									894	0	0	0	0	0	0	0	0	0	0	0	0	0	0	0	0	0	0	0
	895	0	0	0	0	0	0	0	0	0	0	0	0	0	0	0	0	0	0	0	0									895	0	0	0	0	0	0	0	0	0	0	0	0	0	0	0	0	0	0	0
	896	0	0	0	0	0	0	0	0	0	0	0	0	0	0	0	0	0	0	0	0									896	0	0	0	0	0	0	0	0	0	0	0	0	0	0	0	0	0	0	0
	897	0	0	0	0	0	0	0	0	0	0	0	0	0	0	0	0	0	0	0	0									897	0	0	0	0	0	0	0	0	0	0	0	0	0	0	0	0	0	0	0
	898	0	0	0	0	0	0	0	0	0	0	0	0	0	0	0	0	0	0	0	0									898	0	0	0	0	0	0	0	0	0	0	0	0	0	0	0	0	0	0	0
	899	0	0	0	0	0	0	0	0	0	0	0	0	0	0	0	0	0	0	0	0									899	0	0	0	0	0	0	0	0	0	0	0	0	0	0	0	0	0	0	0
	900	0	0	0	0	0	0	0	0	0	0	0	0	0	0	0	0	0	0	0	0									900	0	0	0	0	0	0	0	0	0	0	0	0	0	0	0	0	0	0	0
	901	0	0	0	0	0	0	0	0	0	0	0	0	0	0	0	0	0	0	0	0									901	0	0	0	0	0	0	0	0	0	0	0	0	0	0	0	0	0	0	0
	902	0	0	0	0	0	0	0	0	0	0	0	0	0	0	0	0	0	0	0	0									902	0	0	0	0	0	0	0	0	0	0	0	0	0	0	0	0	0	0	0
	903	0	0	0	0	0	0	0	0	0	0	0	0	0	0	0	0	0	0	0	0									903	0	0	0	0	0	0	0	0	0	0	0	0	0	0	0	0	0	0	0
	904	0	0	0	0	0	0	0	0	0	0	0	0	0	0	0	0	0	0	0	0									904	0	0	0	0	0	0	0	0	0	0	0	0	0	0	0	0	0	0	0
	905	0	0	0	0	0	0	0	0	0	0	0	0	0	0	0	0	0	0	0	0									905	0	0	0	0	0	0	0	0	0	0	0	0	0	0	0	0	0	0	0
	906	0	0	0	0	0	0	0	0	0	0	0	0	0	0	0	0	0	0	0	0									906	0	0	0	0	0	0	0	0	0	0	0	0	0	0	0	0	0	0	0
	907	0	0	0	0	0	0	0	0	0	0	0	0	0	0	0	0	0	0	0	0									907	0	0	0	0	0	0	0	0	0	0	0	0	0	0	0	0	0	0	0
	908	0	0	0	0	0	0	0	0	0	0	0	0	0	0	0	0	0	0	0	0									908	0	0	0	0	0	0	0	0	0	0	0	0	0	0	0	0	0	0	0
	909	0	0	0	0	0	0	0	0	0	0	0	0	0	0	0	0	0	0	0	0									909	0	0	0	0	0	0	0	0	0	0	0	0	0	0	0	0	0	0	0
	910	0	0	0	0	0	0	0	0	0	0	0	0	0	0	0	0	0	0	0	0									910	0	0	0	0	0	0	0	0	0	0	0	0	0	0	0	0	0	0	0
	911	0	0	0	0	0	0	0	0	0	0	0	0	0	0	0	0	0	0	0	0									911	0	0	0	0	0	0	0	0	0	0	0	0	0	0	0	0	0	0	0
	912	0	0	0	0	0	0	0	0	0	0	0	0	0	0	0	0	0	0	0	0									912	0	0	0	0	0	0	0	0	0	0	0	0	0	0	0	0	0	0	0
	913	0	0	0	0	0	0	0	0	0	0	0	0	0	0	0	0	0	0	0	0									913	0	0	0	0	0	0	0	0	0	0	0	0	0	0	0	0	0	0	0
	914	0	0	0	0	0	0	0	0	0	0	0	0	0	0	0	0	0	0	0	0									914	0	0	0	0	0	0	0	0	0	0	0	0	0	0	0	0	0	0	0
	915	0	0	0	0	0	0	0	0	0	0	0	0	0	0	0	0	0	0	0	0									915	0	0	0	0	0	0	0	0	0	0	0	0	0	0	0	0	0	0	0
	916	0	0	0	0	0	0	0	0	0	0	0	0	0	0	0	0	0	0	0	0									916	0	0	0	0	0	0	0	0	0	0	0	0	0	0	0	0	0	0	0
	917	0	0	0	0	0	0	0	0	0	0	0	0	0	0	0	0	0	0	0	0									917	0	0	0	0	0	0	0	0	0	0	0	0	0	0	0	0	0	0	0
	918	0	0	0	0	0	0	0	0	0	0	0	0	0	0	0	0	0	0	0	0									918	0	0	0	0	0	0	0	0	0	0	0	0	0	0	0	0	0	0	0
	919	0	0	0	0	0	0	0	0	0	0	0	0	0	0	0	0	0	0	0	0									919	0	0	0	0	0	0	0	0	0	0	0	0	0	0	0	0	0	0	0
	920	0	0	0	0	0	0	0	0	0	0	0	0	0	0	0	0	0	0	0	0									920	0	0	0	0	0	0	0	0	0	0	0	0	0	0	0	0	0	0	0
	921	0	0	0	0	0	0	0	0	0	0	0	0	0	0	0	0	0	0	0	0									921	0	0	0	0	0	0	0	0	0	0	0	0	0	0	0	0	0	0	0
	922	0	0	0	0	0	0	0	0	0	0	0	0	0	0	0	0	0	0	0	0									922	0	0	0	0	0	0	0	0	0	0	0	0	0	0	0	0	0	0	0
	923	0	0	0	0	0	0	0	0	0	0	0	0	0	0	0	0	0	0	0	0									923	0	0	0	0	0	0	0	0	0	0	0	0	0	0	0	0	0	0	0
	924	0	0	0	0	0	0	0	0	0	0	0	0	0	0	0	0	0	0	0	0									924	0	0	0	0	0	0	0	0	0	0	0	0	0	0	0	0	0	0	0
	925	0	0	0	0	0	0	0	0	0	0	0	0	0	0	0	0	0	0	0	0									925	0	0	0	0	0	0	0	0	0	0	0	0	0	0	0	0	0	0	0
	926	0	0	0	0	0	0	0	0	0	0	0	0	0	0	0	0	0	0	0	0									926	0	0	0	0	0	0	0	0	0	0	0	0	0	0	0	0	0	0	0
	927	0	0	0	0	0	0	0	0	0	0	0	0	0	0	0	0	0	0	0	0									927	0	0	0	0	0	0	0	0	0	0	0	0	0	0	0	0	0	0	0
	928	0	0	0	0	0	0	0	0	0	0	0	0	0	0	0	0	0	0	0	0									928	0	0	0	0	0	0	0	0	0	0	0	0	0	0	0	0	0	0	0
	929	0	0	0	0	0	0	0	0	0	0	0	0	0	0	0	0	0	0	0	0									929	0	0	0	0	0	0	0	0	0	0	0	0	0	0	0	0	0	0	0
	930	0	0	0	0	0	0	0	0	0	0	0	0	0	0	0	0	0	0	0	0									930	0	0	0	0	0	0	0	0	0	0	0	0	0	0	0	0	0	0	0
	931	0	0	0	0	0	0	0	0	0	0	0	0	0	0	0	0	0	0	0	0									931	0	0	0	0	0	0	0	0	0	0	0	0	0	0	0	0	0	0	0
	932	0	0	0	0	0	0	0	0	0	0	0	0	0	0	0	0	0	0	0	0									932	0	0	0	0	0	0	0	0	0	0	0	0	0	0	0	0	0	0	0
	933	0	0	0	0	0	0	0	0	0	0	0	0	0	0	0	0	0	0	0	0									933	0	0	0	0	0	0	0	0	0	0	0	0	0	0	0	0	0	0	0
	934	0	0	0	0	0	0	0	0	0	0	0	0	0	0	0	0	0	0	0	0									934	0	0	0	0	0	0	0	0	0	0	0	0	0	0	0	0	0	0	0
	935	0	0	0	0	0	0	0	0	0	0	0	0	0	0	0	0	0	0	0	0									935	0	0	0	0	0	0	0	0	0	0	0	0	0	0	0	0	0	0	0
	936	0	0	0	0	0	0	0	0	0	0	0	0	0	0	0	0	0	0	0	0									936	0	0	0	0	0	0	0	0	0	0	0	0	0	0	0	0	0	0	0
	937	0	0	0	0	0	0	0	0	0	0	0	0	0	0	0	0	0	0	0	0									937	0	0	0	0	0	0	0	0	0	0	0	0	0	0	0	0	0	0	0
	938	0	0	0	0	0	0	0	0	0	0	0	0	0	0	0	0	0	0	0	0									938	0	0	0	0	0	0	0	0	0	0	0	0	0	0	0	0	0	0	0
	939	0	0	0	0	0	0	0	0	0	0	0	0	0	0	0	0	0	0	0	0									939	0	0	0	0	0	0	0	0	0	0	0	0	0	0	0	0	0	0	0
	940	0	0	0	0	0	0	0	0	0	0	0	0	0	0	0	0	0	0	0	0									940	0	0	0	0	0	0	0	0	0	0	0	0	0	0	0	0	0	0	0
	941	0	0	0	0	0	0	0	0	0	0	0	0	0	0	0	0	0	0	0	0									941	0	0	0	0	0	0	0	0	0	0	0	0	0	0	0	0	0	0	0
	942	0	0	0	0	0	0	0	0	0	0	0	0	0	0	0	0	0	0	0	0									942	0	0	0	0	0	0	0	0	0	0	0	0	0	0	0	0	0	0	0
	943	0	0	0	0	0	0	0	0	0	0	0	0	0	0	0	0	0	0	0	0									943	0	0	0	0	0	0	0	0	0	0	0	0	0	0	0	0	0	0	0
	944	0	0	0	0	0	0	0	0	0	0	0	0	0	0	0	0	0	0	0	0									944	0	0	0	0	0	0	0	0	0	0	0	0	0	0	0	0	0	0	0
	945	0	0	0	0	0	0	0	0	0	0	0	0	0	0	0	0	0	0	0	0									945	0	0	0	0	0	0	0	0	0	0	0	0	0	0	0	0	0	0	0
	946	0	0	0	0	0	0	0	0	0	0	0	0	0	0	0	0	0	0	0	0									946	0	0	0	0	0	0	0	0	0	0	0	0	0	0	0	0	0	0	0
	947	0	0	0	0	0	0	0	0	0	0	0	0	0	0	0	0	0	0	0	0									947	0	0	0	0	0	0	0	0	0	0	0	0	0	0	0	0	0	0	0
	948	0	0	0	0	0	0	0	0	0	0	0	0	0	0	0	0	0	0	0	0									948	0	0	0	0	0	0	0	0	0	0	0	0	0	0	0	0	0	0	0
	949	0	0	0	0	0	0	0	0	0	0	0	0	0	0	0	0	0	0	0	0									949	0	0	0	0	0	0	0	0	0	0	0	0	0	0	0	0	0	0	0
	950	0	0	0	0	0	0	0	0	0	0	0	0	0	0	0	0	0	0	0	0									950	0	0	0	0	0	0	0	0	0	0	0	0	0	0	0	0	0	0	0
	951	0	0	0	0	0	0	0	0	0	0	0	0	0	0	0	0	0	0	0	0									951	0	0	0	0	0	0	0	0	0	0	0	0	0	0	0	0	0	0	0
	952	0	0	0	0	0	0	0	0	0	0	0	0	0	0	0	0	0	0	0	0									952	0	0	0	0	0	0	0	0	0	0	0	0	0	0	0	0	0	0	0
	953	0	0	0	0	0	0	0	0	0	0	0	0	0	0	0	0	0	0	0	0									953	0	0	0	0	0	0	0	0	0	0	0	0	0	0	0	0	0	0	0
	954	0	0	0	0	0	0	0	0	0	0	0	0	0	0	0	0	0	0	0	0									954	0	0	0	0	0	0	0	0	0	0	0	0	0	0	0	0	0	0	0
	955	0	0	0	0	0	0	0	0	0	0	0	0	0	0	0	0	0	0	0	0									955	0	0	0	0	0	0	0	0	0	0	0	0	0	0	0	0	0	0	0
	956	0	0	0	0	0	0	0	0	0	0	0	0	0	0	0	0	0	0	0	0									956	0	0	0	0	0	0	0	0	0	0	0	0	0	0	0	0	0	0	0
	957	0	0	0	0	0	0	0	0	0	0	0	0	0	0	0	0	0	0	0	0									957	0	0	0	0	0	0	0	0	0	0	0	0	0	0	0	0	0	0	0
	958	0	0	0	0	0	0	0	0	0	0	0	0	0	0	0	0	0	0	0	0									958	0	0	0	0	0	0	0	0	0	0	0	0	0	0	0	0	0	0	0
	959	0	0	0	0	0	0	0	0	0	0	0	0	0	0	0	0	0	0	0	0									959	0	0	0	0	0	0	0	0	0	0	0	0	0	0	0	0	0	0	0
	960	0	0	0	0	0	0	0	0	0	0	0	0	0	0	0	0	0	0	0	0									960	0	0	0	0	0	0	0	0	0	0	0	0	0	0	0	0	0	0	0
	961	0	0	0	0	0	0	0	0	0	0	0	0	0	0	0	0	0	0	0	0									961	0	0	0	0	0	0	0	0	0	0	0	0	0	0	0	0	0	0	0
	962	0	0	0	0	0	0	0	0	0	0	0	0	0	0	0	0	0	0	0	0									962	0	0	0	0	0	0	0	0	0	0	0	0	0	0	0	0	0	0	0
	963	0	0	0	0	0	0	0	0	0	0	0	0	0	0	0	0	0	0	0	0									963	0	0	0	0	0	0	0	0	0	0	0	0	0	0	0	0	0	0	0
	964	0	0	0	0	0	0	0	0	0	0	0	0	0	0	0	0	0	0	0	0									964	0	0	0	0	0	0	0	0	0	0	0	0	0	0	0	0	0	0	0
	965	0	0	0	0	0	0	0	0	0	0	0	0	0	0	0	0	0	0	0	0									965	0	0	0	0	0	0	0	0	0	0	0	0	0	0	0	0	0	0	0
	966	0	0	0	0	0	0	0	0	0	0	0	0	0	0	0	0	0	0	0	0									966	0	0	0	0	0	0	0	0	0	0	0	0	0	0	0	0	0	0	0
	967	0	0	0	0	0	0	0	0	0	0	0	0	0	0	0	0	0	0	0	0									967	0	0	0	0	0	0	0	0	0	0	0	0	0	0	0	0	0	0	0
	968	0	0	0	0	0	0	0	0	0	0	0	0	0	0	0	0	0	0	0	0									968	0	0	0	0	0	0	0	0	0	0	0	0	0	0	0	0	0	0	0
	969	0	0	0	0	0	0	0	0	0	0	0	0	0	0	0	0	0	0	0	0									969	0	0	0	0	0	0	0	0	0	0	0	0	0	0	0	0	0	0	0
	970	0	0	0	0	0	0	0	0	0	0	0	0	0	0	0	0	0	0	0	0									970	0	0	0	0	0	0	0	0	0	0	0	0	0	0	0	0	0	0	0
	971	0	0	0	0	0	0	0	0	0	0	0	0	0	0	0	0	0	0	0	0									971	0	0	0	0	0	0	0	0	0	0	0	0	0	0	0	0	0	0	0
	972	0	0	0	0	0	0	0	0	0	0	0	0	0	0	0	0	0	0	0	0									972	0	0	0	0	0	0	0	0	0	0	0	0	0	0	0	0	0	0	0
	973	0	0	0	0	0	0	0	0	0	0	0	0	0	0	0	0	0	0	0	0									973	0	0	0	0	0	0	0	0	0	0	0	0	0	0	0	0	0	0	0
	974	0	0	0	0	0	0	0	0	0	0	0	0	0	0	0	0	0	0	0	0									974	0	0	0	0	0	0	0	0	0	0	0	0	0	0	0	0	0	0	0
	975	0	0	0	0	0	0	0	0	0	0	0	0	0	0	0	0	0	0	0	0									975	0	0	0	0	0	0	0	0	0	0	0	0	0	0	0	0	0	0	0
	976	0	0	0	0	0	0	0	0	0	0	0	0	0	0	0	0	0	0	0	0									976	0	0	0	0	0	0	0	0	0	0	0	0	0	0	0	0	0	0	0
	977	0	0	0	0	0	0	0	0	0	0	0	0	0	0	0	0	0	0	0	0									977	0	0	0	0	0	0	0	0	0	0	0	0	0	0	0	0	0	0	0
	978	0	0	0	0	0	0	0	0	0	0	0	0	0	0	0	0	0	0	0	0									978	0	0	0	0	0	0	0	0	0	0	0	0	0	0	0	0	0	0	0
	979	0	0	0	0	0	0	0	0	0	0	0	0	0	0	0	0	0	0	0	0									979	0	0	0	0	0	0	0	0	0	0	0	0	0	0	0	0	0	0	0
	980	0	0	0	0	0	0	0	0	0	0	0	0	0	0	0	0	0	0	0	0									980	0	0	0	0	0	0	0	0	0	0	0	0	0	0	0	0	0	0	0
	981	0	0	0	0	0	0	0	0	0	0	0	0	0	0	0	0	0	0	0	0									981	0	0	0	0	0	0	0	0	0	0	0	0	0	0	0	0	0	0	0
	982	0	0	0	0	0	0	0	0	0	0	0	0	0	0	0	0	0	0	0	0									982	0	0	0	0	0	0	0	0	0	0	0	0	0	0	0	0	0	0	0
	983	0	0	0	0	0	0	0	0	0	0	0	0	0	0	0	0	0	0	0	0									983	0	0	0	0	0	0	0	0	0	0	0	0	0	0	0	0	0	0	0
	984	0	0	0	0	0	0	0	0	0	0	0	0	0	0	0	0	0	0	0	0									984	0	0	0	0	0	0	0	0	0	0	0	0	0	0	0	0	0	0	0
	985	0	0	0	0	0	0	0	0	0	0	0	0	0	0	0	0	0	0	0	0									985	0	0	0	0	0	0	0	0	0	0	0	0	0	0	0	0	0	0	0
	986	0	0	0	0	0	0	0	0	0	0	0	0	0	0	0	0	0	0	0	0									986	0	0	0	0	0	0	0	0	0	0	0	0	0	0	0	0	0	0	0
	987	0	0	0	0	0	0	0	0	0	0	0	0	0	0	0	0	0	0	0	0									987	0	0	0	0	0	0	0	0	0	0	0	0	0	0	0	0	0	0	0
	988	0	0	0	0	0	0	0	0	0	0	0	0	0	0	0	0	0	0	0	0									988	0	0	0	0	0	0	0	0	0	0	0	0	0	0	0	0	0	0	0
	989	0	0	0	0	0	0	0	0	0	0	0	0	0	0	0	0	0	0	0	0									989	0	0	0	0	0	0	0	0	0	0	0	0	0	0	0	0	0	0	0
	990	0	0	0	0	0	0	0	0	0	0	0	0	0	0	0	0	0	0	0	0									990	0	0	0	0	0	0	0	0	0	0	0	0	0	0	0	0	0	0	0
	991	0	0	0	0	0	0	0	0	0	0	0	0	0	0	0	0	0	0	0	0									991	0	0	0	0	0	0	0	0	0	0	0	0	0	0	0	0	0	0	0
	992	0	0	0	0	0	0	0	0	0	0	0	0	0	0	0	0	0	0	0	0									992	0	0	0	0	0	0	0	0	0	0	0	0	0	0	0	0	0	0	0
	993	0	0	0	0	0	0	0	0	0	0	0	0	0	0	0	0	0	0	0	0									993	0	0	0	0	0	0	0	0	0	0	0	0	0	0	0	0	0	0	0
	994	0	0	0	0	0	0	0	0	0	0	0	0	0	0	0	0	0	0	0	0									994	0	0	0	0	0	0	0	0	0	0	0	0	0	0	0	0	0	0	0
	995	0	0	0	0	0	0	0	0	0	0	0	0	0	0	0	0	0	0	0	0									995	0	0	0	0	0	0	0	0	0	0	0	0	0	0	0	0	0	0	0
	996	0	0	0	0	0	0	0	0	0	0	0	0	0	0	0	0	0	0	0	0									996	0	0	0	0	0	0	0	0	0	0	0	0	0	0	0	0	0	0	0
	997	0	0	0	0	0	0	0	0	0	0	0	0	0	0	0	0	0	0	0	0									997	0	0	0	0	0	0	0	0	0	0	0	0	0	0	0	0	0	0	0
	998	0	0	0	0	0	0	0	0	0	0	0	0	0	0	0	0	0	0	0	0									998	0	0	0	0	0	0	0	0	0	0	0	0	0	0	0	0	0	0	0
	999	0	0	0	0	0	0	0	0	0	0	0	0	0	0	0	0	0	0	0	0									999	0	0	0	0	0	0	0	0	0	0	0	0	0	0	0	0	0	0	0
	1000	0	0	0	0	0	0	0	0	0	0	0	0	0	0	0	0	0	0	0	0									1000	0	0	0	0	0	0	0	0	0	0	0	0	0	0	0	0	0	0	0
	1001	0	0	0	0	0	0	0	0	0	0	0	0	0	0	0	0	0	0	0	0									1001	0	0	0	0	0	0	0	0	0	0	0	0	0	0	0	0	0	0	0
	1002	0	0	0	0	0	0	0	0	0	0	0	0	0	0	0	0	0	0	0	0									1002	0	0	0	0	0	0	0	0	0	0	0	0	0	0	0	0	0	0	0
	1003	0	0	0	0	0	0	0	0	0	0	0	0	0	0	0	0	0	0	0	0									1003	0	0	0	0	0	0	0	0	0	0	0	0	0	0	0	0	0	0	0
	1004	0	0	0	0	0	0	0	0	0	0	0	0	0	0	0	0	0	0	0	0									1004	0	0	0	0	0	0	0	0	0	0	0	0	0	0	0	0	0	0	0
	1005	0	0	0	0	0	0	0	0	0	0	0	0	0	0	0	0	0	0	0	0									1005	0	0	0	0	0	0	0	0	0	0	0	0	0	0	0	0	0	0	0
	1006	0	0	0	0	0	0	0	0	0	0	0	0	0	0	0	0	0	0	0	0									1006	0	0	0	0	0	0	0	0	0	0	0	0	0	0	0	0	0	0	0
	1007	0	0	0	0	0	0	0	0	0	0	0	0	0	0	0	0	0	0	0	0									1007	0	0	0	0	0	0	0	0	0	0	0	0	0	0	0	0	0	0	0
	1008	0	0	0	0	0	0	0	0	0	0	0	0	0	0	0	0	0	0	0	0									1008	0	0	0	0	0	0	0	0	0	0	0	0	0	0	0	0	0	0	0
	1009	0	0	0	0	0	0	0	0	0	0	0	0	0	0	0	0	0	0	0	0									1009	0	0	0	0	0	0	0	0	0	0	0	0	0	0	0	0	0	0	0
	1010	0	0	0	0	0	0	0	0	0	0	0	0	0	0	0	0	0	0	0	0									1010	0	0	0	0	0	0	0	0	0	0	0	0	0	0	0	0	0	0	0
	1011	0	0	0	0	0	0	0	0	0	0	0	0	0	0	0	0	0	0	0	0									1011	0	0	0	0	0	0	0	0	0	0	0	0	0	0	0	0	0	0	0
	1012	0	0	0	0	0	0	0	0	0	0	0	0	0	0	0	0	0	0	0	0									1012	0	0	0	0	0	0	0	0	0	0	0	0	0	0	0	0	0	0	0
	1013	0	0	0	0	0	0	0	0	0	0	0	0	0	0	0	0	0	0	0	0									1013	0	0	0	0	0	0	0	0	0	0	0	0	0	0	0	0	0	0	0
	1014	0	0	0	0	0	0	0	0	0	0	0	0	0	0	0	0	0	0	0	0									1014	0	0	0	0	0	0	0	0	0	0	0	0	0	0	0	0	0	0	0
	1015	0	0	0	0	0	0	0	0	0	0	0	0	0	0	0	0	0	0	0	0									1015	0	0	0	0	0	0	0	0	0	0	0	0	0	0	0	0	0	0	0
	1016	0	0	0	0	0	0	0	0	0	0	0	0	0	0	0	0	0	0	0	0									1016	0	0	0	0	0	0	0	0	0	0	0	0	0	0	0	0	0	0	0
	1017	0	0	0	0	0	0	0	0	0	0	0	0	0	0	0	0	0	0	0	0									1017	0	0	0	0	0	0	0	0	0	0	0	0	0	0	0	0	0	0	0
	1018	0	0	0	0	0	0	0	0	0	0	0	0	0	0	0	0	0	0	0	0									1018	0	0	0	0	0	0	0	0	0	0	0	0	0	0	0	0	0	0	0
	1019	0	0	0	0	0	0	0	0	0	0	0	0	0	0	0	0	0	0	0	0									1019	0	0	0	0	0	0	0	0	0	0	0	0	0	0	0	0	0	0	0
	1020	0	0	0	0	0	0	0	0	0	0	0	0	0	0	0	0	0	0	0	0									1020	0	0	0	0	0	0	0	0	0	0	0	0	0	0	0	0	0	0	0
	1021	0	0	0	0	0	0	0	0	0	0	0	0	0	0	0	0	0	0	0	0									1021	0	0	0	0	0	0	0	0	0	0	0	0	0	0	0	0	0	0	0
	1022	0	0	0	0	0	0	0	0	0	0	0	0	0	0	0	0	0	0	0	0									1022	0	0	0	0	0	0	0	0	0	0	0	0	0	0	0	0	0	0	0
	1023	0	0	0	0	0	0	0	0	0	0	0	0	0	0	0	0	0	0	0	0									1023	0	0	0	0	0	0	0	0	0	0	0	0	0	0	0	0	0	0	0
	1024	0	0	0	0	0	0	0	0	0	0	0	0	0	0	0	0	0	0	0	0									1024	0	0	0	0	0	0	0	0	0	0	0	0	0	0	0	0	0	0	0
	1025	0	0	0	0	0	0	0	0	0	0	0	0	0	0	0	0	0	0	0	0									1025	0	0	0	0	0	0	0	0	0	0	0	0	0	0	0	0	0	0	0
	1026	0	0	0	0	0	0	0	0	0	0	0	0	0	0	0	0	0	0	0	0									1026	0	0	0	0	0	0	0	0	0	0	0	0	0	0	0	0	0	0	0
	1027	0	0	0	0	0	0	0	0	0	0	0	0	0	0	0	0	0	0	0	0									1027	0	0	0	0	0	0	0	0	0	0	0	0	0	0	0	0	0	0	0
	1028	0	0	0	0	0	0	0	0	0	0	0	0	0	0	0	0	0	0	0	0									1028	0	0	0	0	0	0	0	0	0	0	0	0	0	0	0	0	0	0	0
	1029	0	0	0	0	0	0	0	0	0	0	0	0	0	0	0	0	0	0	0	0									1029	0	0	0	0	0	0	0	0	0	0	0	0	0	0	0	0	0	0	0
	1030	0	0	0	0	0	0	0	0	0	0	0	0	0	0	0	0	0	0	0	0									1030	0	0	0	0	0	0	0	0	0	0	0	0	0	0	0	0	0	0	0
	1031	0	0	0	0	0	0	0	0	0	0	0	0	0	0	0	0	0	0	0	0									1031	0	0	0	0	0	0	0	0	0	0	0	0	0	0	0	0	0	0	0
	1032	0	0	0	0	0	0	0	0	0	0	0	0	0	0	0	0	0	0	0	0									1032	0	0	0	0	0	0	0	0	0	0	0	0	0	0	0	0	0	0	0
	1033	0	0	0	0	0	0	0	0	0	0	0	0	0	0	0	0	0	0	0	0									1033	0	0	0	0	0	0	0	0	0	0	0	0	0	0	0	0	0	0	0
	1034	0	0	0	0	0	0	0	0	0	0	0	0	0	0	0	0	0	0	0	0									1034	0	0	0	0	0	0	0	0	0	0	0	0	0	0	0	0	0	0	0
	1035	0	0	0	0	0	0	0	0	0	0	0	0	0	0	0	0	0	0	0	0									1035	0	0	0	0	0	0	0	0	0	0	0	0	0	0	0	0	0	0	0
	1036	0	0	0	0	0	0	0	0	0	0	0	0	0	0	0	0	0	0	0	0									1036	0	0	0	0	0	0	0	0	0	0	0	0	0	0	0	0	0	0	0
	1037	0	0	0	0	0	0	0	0	0	0	0	0	0	0	0	0	0	0	0	0									1037	0	0	0	0	0	0	0	0	0	0	0	0	0	0	0	0	0	0	0
	1038	0	0	0	0	0	0	0	0	0	0	0	0	0	0	0	0	0	0	0	0									1038	0	0	0	0	0	0	0	0	0	0	0	0	0	0	0	0	0	0	0
	1039	0	0	0	0	0	0	0	0	0	0	0	0	0	0	0	0	0	0	0	0									1039	0	0	0	0	0	0	0	0	0	0	0	0	0	0	0	0	0	0	0
	1040	0	0	0	0	0	0	0	0	0	0	0	0	0	0	0	0	0	0	0	0									1040	0	0	0	0	0	0	0	0	0	0	0	0	0	0	0	0	0	0	0
	1041	0	0	0	0	0	0	0	0	0	0	0	0	0	0	0	0	0	0	0	0									1041	0	0	0	0	0	0	0	0	0	0	0	0	0	0	0	0	0	0	0
	1042	0	0	0	0	0	0	0	0	0	0	0	0	0	0	0	0	0	0	0	0									1042	0	0	0	0	0	0	0	0	0	0	0	0	0	0	0	0	0	0	0
	1043	0	0	0	0	0	0	0	0	0	0	0	0	0	0	0	0	0	0	0	0									1043	0	0	0	0	0	0	0	0	0	0	0	0	0	0	0	0	0	0	0
	1044	0	0	0	0	0	0	0	0	0	0	0	0	0	0	0	0	0	0	0	0									1044	0	0	0	0	0	0	0	0	0	0	0	0	0	0	0	0	0	0	0
	1045	0	0	0	0	0	0	0	0	0	0	0	0	0	0	0	0	0	0	0	0									1045	0	0	0	0	0	0	0	0	0	0	0	0	0	0	0	0	0	0	0
	1046	0	0	0	0	0	0	0	0	0	0	0	0	0	0	0	0	0	0	0	0									1046	0	0	0	0	0	0	0	0	0	0	0	0	0	0	0	0	0	0	0
	1047	0	0	0	0	0	0	0	0	0	0	0	0	0	0	0	0	0	0	0	0									1047	0	0	0	0	0	0	0	0	0	0	0	0	0	0	0	0	0	0	0
	1048	0	0	0	0	0	0	0	0	0	0	0	0	0	0	0	0	0	0	0	0									1048	0	0	0	0	0	0	0	0	0	0	0	0	0	0	0	0	0	0	0
	1049	0	0	0	0	0	0	0	0	0	0	0	0	0	0	0	0	0	0	0	0									1049	0	0	0	0	0	0	0	0	0	0	0	0	0	0	0	0	0	0	0
	1050	0	0	0	0	0	0	0	0	0	0	0	0	0	0	0	0	0	0	0	0									1050	0	0	0	0	0	0	0	0	0	0	0	0	0	0	0	0	0	0	0
	1051	0	0	0	0	0	0	0	0	0	0	0	0	0	0	0	0	0	0	0	0									1051	0	0	0	0	0	0	0	0	0	0	0	0	0	0	0	0	0	0	0
	1052	0	0	0	0	0	0	0	0	0	0	0	0	0	0	0	0	0	0	0	0									1052	0	0	0	0	0	0	0	0	0	0	0	0	0	0	0	0	0	0	0
	1053	0	0	0	0	0	0	0	0	0	0	0	0	0	0	0	0	0	0	0	0									1053	0	0	0	0	0	0	0	0	0	0	0	0	0	0	0	0	0	0	0
	1054	0	0	0	0	0	0	0	0	0	0	0	0	0	0	0	0	0	0	0	0									1054	0	0	0	0	0	0	0	0	0	0	0	0	0	0	0	0	0	0	0
	1055	0	0	0	0	0	0	0	0	0	0	0	0	0	0	0	0	0	0	0	0									1055	0	0	0	0	0	0	0	0	0	0	0	0	0	0	0	0	0	0	0
	1056	0	0	0	0	0	0	0	0	0	0	0	0	0	0	0	0	0	0	0	0									1056	0	0	0	0	0	0	0	0	0	0	0	0	0	0	0	0	0	0	0
	1057	0	0	0	0	0	0	0	0	0	0	0	0	0	0	0	0	0	0	0	0									1057	0	0	0	0	0	0	0	0	0	0	0	0	0	0	0	0	0	0	0
	1058	0	0	0	0	0	0	0	0	0	0	0	0	0	0	0	0	0	0	0	0									1058	0	0	0	0	0	0	0	0	0	0	0	0	0	0	0	0	0	0	0
	1059	0	0	0	0	0	0	0	0	0	0	0	0	0	0	0	0	0	0	0	0									1059	0	0	0	0	0	0	0	0	0	0	0	0	0	0	0	0	0	0	0
	1060	0	0	0	0	0	0	0	0	0	0	0	0	0	0	0	0	0	0	0	0									1060	0	0	0	0	0	0	0	0	0	0	0	0	0	0	0	0	0	0	0
	1061	0	0	0	0	0	0	0	0	0	0	0	0	0	0	0	0	0	0	0	0									1061	0	0	0	0	0	0	0	0	0	0	0	0	0	0	0	0	0	0	0
	1062	0	0	0	0	0	0	0	0	0	0	0	0	0	0	0	0	0	0	0	0									1062	0	0	0	0	0	0	0	0	0	0	0	0	0	0	0	0	0	0	0
	1063	0	0	0	0	0	0	0	0	0	0	0	0	0	0	0	0	0	0	0	0									1063	0	0	0	0	0	0	0	0	0	0	0	0	0	0	0	0	0	0	0
	1064	0	0	0	0	0	0	0	0	0	0	0	0	0	0	0	0	0	0	0	0									1064	0	0	0	0	0	0	0	0	0	0	0	0	0	0	0	0	0	0	0
	1065	0	0	0	0	0	0	0	0	0	0	0	0	0	0	0	0	0	0	0	0									1065	0	0	0	0	0	0	0	0	0	0	0	0	0	0	0	0	0	0	0
	1066	0	0	0	0	0	0	0	0	0	0	0	0	0	0	0	0	0	0	0	0									1066	0	0	0	0	0	0	0	0	0	0	0	0	0	0	0	0	0	0	0
	1067	0	0	0	0	0	0	0	0	0	0	0	0	0	0	0	0	0	0	0	0									1067	0	0	0	0	0	0	0	0	0	0	0	0	0	0	0	0	0	0	0
	1068	0	0	0	0	0	0	0	0	0	0	0	0	0	0	0	0	0	0	0	0									1068	0	0	0	0	0	0	0	0	0	0	0	0	0	0	0	0	0	0	0
	1069	0	0	0	0	0	0	0	0	0	0	0	0	0	0	0	0	0	0	0	0									1069	0	0	0	0	0	0	0	0	0	0	0	0	0	0	0	0	0	0	0
	1070	0	0	0	0	0	0	0	0	0	0	0	0	0	0	0	0	0	0	0	0
	1071	0	0	0	0	0	0	0	0	0	0	0	0	0	0	0	0	0	0	0	0
	1072	0	0	0	0	0	0	0	0	0	0	0	0	0	0	0	0	0	0	0	0
	1073	0	0	0	0	0	0	0	0	0	0	0	0	0	0	0	0	0	0	0	0
	1074	0	0	0	0	0	0	0	0	0	0	0	0	0	0	0	0	0	0	0	0
	1075	0	0	0	0	0	0	0	0	0	0	0	0	0	0	0	0	0	0	0	0
	1076	0	0	0	0	0	0	0	0	0	0	0	0	0	0	0	0	0	0	0	0
	1077	0	0	0	0	0	0	0	0	0	0	0	0	0	0	0	0	0	0	0	0
	1078	0	0	0	0	0	0	0	0	0	0	0	0	0	0	0	0	0	0	0	0
	1079	0	0	0	0	0	0	0	0	0	0	0	0	0	0	0	0	0	0	0	0
	1080	0	0	0	0	0	0	0	0	0	0	0	0	0	0	0	0	0	0	0	0
	1081	0	0	0	0	0	0	0	0	0	0	0	0	0	0	0	0	0	0	0	0
	1082	0	0	0	0	0	0	0	0	0	0	0	0	0	0	0	0	0	0	0	0
	1083	0	0	0	0	0	0	0	0	0	0	0	0	0	0	0	0	0	0	0	0
	1084	0	0	0	0	0	0	0	0	0	0	0	0	0	0	0	0	0	0	0	0
	1085	0	0	0	0	0	0	0	0	0	0	0	0	0	0	0	0	0	0	0	0
	1086	0	0	0	0	0	0	0	0	0	0	0	0	0	0	0	0	0	0	0	0
	1087	0	0	0	0	0	0	0	0	0	0	0	0	0	0	0	0	0	0	0	0
	1088	0	0	0	0	0	0	0	0	0	0	0	0	0	0	0	0	0	0	0	0
	1089	0	0	0	0	0	0	0	0	0	0	0	0	0	0	0	0	0	0	0	0
	1090	0	0	0	0	0	0	0	0	0	0	0	0	0	0	0	0	0	0	0	0
	1091	0	0	0	0	0	0	0	0	0	0	0	0	0	0	0	0	0	0	0	0
	1092	0	0	0	0	0	0	0	0	0	0	0	0	0	0	0	0	0	0	0	0
	1093	0	0	0	0	0	0	0	0	0	0	0	0	0	0	0	0	0	0	0	0
	1094	0	0	0	0	0	0	0	0	0	0	0	0	0	0	0	0	0	0	0	0
	1095	0	0	0	0	0	0	0	0	0	0	0	0	0	0	0	0	0	0	0	0
	1096	0	0	0	0	0	0	0	0	0	0	0	0	0	0	0	0	0	0	0	0
	1097	0	0	0	0	0	0	0	0	0	0	0	0	0	0	0	0	0	0	0	0
	1098	0	0	0	0	0	0	0	0	0	0	0	0	0	0	0	0	0	0	0	0
	1099	0	0	0	0	0	0	0	0	0	0	0	0	0	0	0	0	0	0	0	0
	1100	0	0	0	0	0	0	0	0	0	0	0	0	0	0	0	0	0	0	0	0
	1101	0	0	0	0	0	0	0	0	0	0	0	0	0	0	0	0	0	0	0	0
	1102	0	0	0	0	0	0	0	0	0	0	0	0	0	0	0	0	0	0	0	0
	1103	0	0	0	0	0	0	0	0	0	0	0	0	0	0	0	0	0	0	0	0
	1104	0	0	0	0	0	0	0	0	0	0	0	0	0	0	0	0	0	0	0	0
	1105	0	0	0	0	0	0	0	0	0	0	0	0	0	0	0	0	0	0	0	0
	1106	0	0	0	0	0	0	0	0	0	0	0	0	0	0	0	0	0	0	0	0
	1107	0	0	0	0	0	0	0	0	0	0	0	0	0	0	0	0	0	0	0	0
	1108	0	0	0	0	0	0	0	0	0	0	0	0	0	0	0	0	0	0	0	0
	1109	0	0	0	0	0	0	0	0	0	0	0	0	0	0	0	0	0	0	0	0
	1110	0	0	0	0	0	0	0	0	0	0	0	0	0	0	0	0	0	0	0	0
	1111	0	0	0	0	0	0	0	0	0	0	0	0	0	0	0	0	0	0	0	0
	1112	0	0	0	0	0	0	0	0	0	0	0	0	0	0	0	0	0	0	0	0
	1113	0	0	0	0	0	0	0	0	0	0	0	0	0	0	0	0	0	0	0	0
	1114	0	0	0	0	0	0	0	0	0	0	0	0	0	0	0	0	0	0	0	0
	1115	0	0	0	0	0	0	0	0	0	0	0	0	0	0	0	0	0	0	0	0
	1116	0	0	0	0	0	0	0	0	0	0	0	0	0	0	0	0	0	0	0	0
	1117	0	0	0	0	0	0	0	0	0	0	0	0	0	0	0	0	0	0	0	0
	1118	0	0	0	0	0	0	0	0	0	0	0	0	0	0	0	0	0	0	0	0
	1119	0	0	0	0	0	0	0	0	0	0	0	0	0	0	0	0	0	0	0	0
	1120	0	0	0	0	0	0	0	0	0	0	0	0	0	0	0	0	0	0	0	0
	1121	0	0	0	0	0	0	0	0	0	0	0	0	0	0	0	0	0	0	0	0
	1122	0	0	0	0	0	0	0	0	0	0	0	0	0	0	0	0	0	0	0	0
	1123	0	0	0	0	0	0	0	0	0	0	0	0	0	0	0	0	0	0	0	0
	1124	0	0	0	0	0	0	0	0	0	0	0	0	0	0	0	0	0	0	0	0
	1125	0	0	0	0	0	0	0	0	0	0	0	0	0	0	0	0	0	0	0	0
	1126	0	0	0	0	0	0	0	0	0	0	0	0	0	0	0	0	0	0	0	0
	1127	0	0	0	0	0	0	0	0	0	0	0	0	0	0	0	0	0	0	0	0
	1128	0	0	0	0	0	0	0	0	0	0	0	0	0	0	0	0	0	0	0	0
	1129	0	0	0	0	0	0	0	0	0	0	0	0	0	0	0	0	0	0	0	0
	1130	0	0	0	0	0	0	0	0	0	0	0	0	0	0	0	0	0	0	0	0
	1131	0	0	0	0	0	0	0	0	0	0	0	0	0	0	0	0	0	0	0	0
	1132	0	0	0	0	0	0	0	0	0	0	0	0	0	0	0	0	0	0	0	0
	1133	0	0	0	0	0	0	0	0	0	0	0	0	0	0	0	0	0	0	0	0
	1134	0	0	0	0	0	0	0	0	0	0	0	0	0	0	0	0	0	0	0	0
	1135	0	0	0	0	0	0	0	0	0	0	0	0	0	0	0	0	0	0	0	0
	1136	0	0	0	0	0	0	0	0	0	0	0	0	0	0	0	0	0	0	0	0
	1137	0	0	0	0	0	0	0	0	0	0	0	0	0	0	0	0	0	0	0	0
	1138	0	0	0	0	0	0	0	0	0	0	0	0	0	0	0	0	0	0	0	0
	1139	0	0	0	0	0	0	0	0	0	0	0	0	0	0	0	0	0	0	0	0
	1140	0	0	0	0	0	0	0	0	0	0	0	0	0	0	0	0	0	0	0	0
	1141	0	0	0	0	0	0	0	0	0	0	0	0	0	0	0	0	0	0	0	0
	1142	0	0	0	0	0	0	0	0	0	0	0	0	0	0	0	0	0	0	0	0
	1143	0	0	0	0	0	0	0	0	0	0	0	0	0	0	0	0	0	0	0	0
	1144	0	0	0	0	0	0	0	0	0	0	0	0	0	0	0	0	0	0	0	0
	1145	0	0	0	0	0	0	0	0	0	0	0	0	0	0	0	0	0	0	0	0
	1146	0	0	0	0	0	0	0	0	0	0	0	0	0	0	0	0	0	0	0	0
	1147	0	0	0	0	0	0	0	0	0	0	0	0	0	0	0	0	0	0	0	0
	1148	0	0	0	0	0	0	0	0	0	0	0	0	0	0	0	0	0	0	0	0
	1149	0	0	0	0	0	0	0	0	0	0	0	0	0	0	0	0	0	0	0	0
	1150	0	0	0	0	0	0	0	0	0	0	0	0	0	0	0	0	0	0	0	0
	1151	0	0	0	0	0	0	0	0	0	0	0	0	0	0	0	0	0	0	0	0
	1152	0	0	0	0	0	0	0	0	0	0	0	0	0	0	0	0	0	0	0	0
	1153	0	0	0	0	0	0	0	0	0	0	0	0	0	0	0	0	0	0	0	0
	1154	0	0	0	0	0	0	0	0	0	0	0	0	0	0	0	0	0	0	0	0
	1155	0	0	0	0	0	0	0	0	0	0	0	0	0	0	0	0	0	0	0	0
	1156	0	0	0	0	0	0	0	0	0	0	0	0	0	0	0	0	0	0	0	0
	1157	0	0	0	0	0	0	0	0	0	0	0	0	0	0	0	0	0	0	0	0
	1158	0	0	0	0	0	0	0	0	0	0	0	0	0	0	0	0	0	0	0	0
	1159	0	0	0	0	0	0	0	0	0	0	0	0	0	0	0	0	0	0	0	0
	1160	0	0	0	0	0	0	0	0	0	0	0	0	0	0	0	0	0	0	0	0
	1161	0	0	0	0	0	0	0	0	0	0	0	0	0	0	0	0	0	0	0	0
	1162	0	0	0	0	0	0	0	0	0	0	0	0	0	0	0	0	0	0	0	0
	1163	0	0	0	0	0	0	0	0	0	0	0	0	0	0	0	0	0	0	0	0
	1164	0	0	0	0	0	0	0	0	0	0	0	0	0	0	0	0	0	0	0	0
	1165	0	0	0	0	0	0	0	0	0	0	0	0	0	0	0	0	0	0	0	0
	1166	0	0	0	0	0	0	0	0	0	0	0	0	0	0	0	0	0	0	0	0
	1167	0	0	0	0	0	0	0	0	0	0	0	0	0	0	0	0	0	0	0	0
	1168	0	0	0	0	0	0	0	0	0	0	0	0	0	0	0	0	0	0	0	0
	1169	0	0	0	0	0	0	0	0	0	0	0	0	0	0	0	0	0	0	0	0
	1170	0	0	0	0	0	0	0	0	0	0	0	0	0	0	0	0	0	0	0	0
	1171	0	0	0	0	0	0	0	0	0	0	0	0	0	0	0	0	0	0	0	0
	1172	0	0	0	0	0	0	0	0	0	0	0	0	0	0	0	0	0	0	0	0
	1173	0	0	0	0	0	0	0	0	0	0	0	0	0	0	0	0	0	0	0	0
	1174	0	0	0	0	0	0	0	0	0	0	0	0	0	0	0	0	0	0	0	0
	1175	0	0	0	0	0	0	0	0	0	0	0	0	0	0	0	0	0	0	0	0
	1176	0	0	0	0	0	0	0	0	0	0	0	0	0	0	0	0	0	0	0	0
	1177	0	0	0	0	0	0	0	0	0	0	0	0	0	0	0	0	0	0	0	0
	1178	0	0	0	0	0	0	0	0	0	0	0	0	0	0	0	0	0	0	0	0
	1179	0	0	0	0	0	0	0	0	0	0	0	0	0	0	0	0	0	0	0	0
	1180	0	0	0	0	0	0	0	0	0	0	0	0	0	0	0	0	0	0	0	0
	1181	0	0	0	0	0	0	0	0	0	0	0	0	0	0	0	0	0	0	0	0
	1182	0	0	0	0	0	0	0	0	0	0	0	0	0	0	0	0	0	0	0	0
	1183	0	0	0	0	0	0	0	0	0	0	0	0	0	0	0	0	0	0	0	0
	1184	0	0	0	0	0	0	0	0	0	0	0	0	0	0	0	0	0	0	0	0
	1185	0	0	0	0	0	0	0	0	0	0	0	0	0	0	0	0	0	0	0	0
	1186	0	0	0	0	0	0	0	0	0	0	0	0	0	0	0	0	0	0	0	0
	1187	0	0	0	0	0	0	0	0	0	0	0	0	0	0	0	0	0	0	0	0
	1188	0	0	0	0	0	0	0	0	0	0	0	0	0	0	0	0	0	0	0	0
	1189	0	0	0	0	0	0	0	0	0	0	0	0	0	0	0	0	0	0	0	0
	1190	0	0	0	0	0	0	0	0	0	0	0	0	0	0	0	0	0	0	0	0
	1191	0	0	0	0	0	0	0	0	0	0	0	0	0	0	0	0	0	0	0	0
	1192	0	0	0	0	0	0	0	0	0	0	0	0	0	0	0	0	0	0	0	0
	1193	0	0	0	0	0	0	0	0	0	0	0	0	0	0	0	0	0	0	0	0
	1194	0	0	0	0	0	0	0	0	0	0	0	0	0	0	0	0	0	0	0	0
	1195	0	0	0	0	0	0	0	0	0	0	0	0	0	0	0	0	0	0	0	0
	1196	0	0	0	0	0	0	0	0	0	0	0	0	0	0	0	0	0	0	0	0
	1197	0	0	0	0	0	0	0	0	0	0	0	0	0	0	0	0	0	0	0	0
	1198	0	0	0	0	0	0	0	0	0	0	0	0	0	0	0	0	0	0	0	0
	1199	0	0	0	0	0	0	0	0	0	0	0	0	0	0	0	0	0	0	0	0
	1200	0	0	0	0	0	0	0	0	0	0	0	0	0	0	0	0	0	0	0	0
	1201	0	0	0	0	0	0	0	0	0	0	0	0	0	0	0	0	0	0	0	0
	1202	0	0	0	0	0	0	0	0	0	0	0	0	0	0	0	0	0	0	0	0
	1203	0	0	0	0	0	0	0	0	0	0	0	0	0	0	0	0	0	0	0	0
	1204	0	0	0	0	0	0	0	0	0	0	0	0	0	0	0	0	0	0	0	0
	1205	0	0	0	0	0	0	0	0	0	0	0	0	0	0	0	0	0	0	0	0
	1206	0	0	0	0	0	0	0	0	0	0	0	0	0	0	0	0	0	0	0	0
	1207	0	0	0	0	0	0	0	0	0	0	0	0	0	0	0	0	0	0	0	0
	1208	0	0	0	0	0	0	0	0	0	0	0	0	0	0	0	0	0	0	0	0
	1209	0	0	0	0	0	0	0	0	0	0	0	0	0	0	0	0	0	0	0	0
	1210	0	0	0	0	0	0	0	0	0	0	0	0	0	0	0	0	0	0	0	0
	1211	0	0	0	0	0	0	0	0	0	0	0	0	0	0	0	0	0	0	0	0
	1212	0	0	0	0	0	0	0	0	0	0	0	0	0	0	0	0	0	0	0	0
	1213	0	0	0	0	0	0	0	0	0	0	0	0	0	0	0	0	0	0	0	0										0	0	0	0	0	0	0	0	0	0	0	0	0	0	0	0	0	0	0
	1214	0	0	0	0	0	0	0	0	0	0	0	0	0	0	0	0	0	0	0	0										0	0	0	0	0	0	0	0	0	0	0	0	0	0	0	0	0	0	0
	1215	0	0	0	0	0	0	0	0	0	0	0	0	0	0	0	0	0	0	0	0										0	0	0	0	0	0	0	0	0	0	0	0	0	0	0	0	0	0	0
	1216	0	0	0	0	0	0	0	0	0	0	0	0	0	0	0	0	0	0	0	0										0	0	0	0	0	0	0	0	0	0	0	0	0	0	0	0	0	0	0
	1217	0	0	0	0	0	0	0	0	0	0	0	0	0	0	0	0	0	0	0	0										0	0	0	0	0	0	0	0	0	0	0	0	0	0	0	0	0	0	0
																															0	0	0	0	0	0	0	0	0	0	0	0	0	0	0	0	0	0	0
SUM	609	70	0	0	0	0	0	0	0	0	0	0	0	0	0	0	0	0	0	0	0									571915	560	0	0	0	0	0	0	0	0	0	0	0	0	0	0	0	0	0	0
CN X SUM OF ELEM.		560	0	0	0	0	0	0	0	0	0	0	0	0	0	0	0	0	0	0	0
		7	8	9	10	11	12	13	14	15	16	17	18	19	20	21	22	23	24	25	26
	SC	1	#DIV/0!	#DIV/0!	#DIV/0!	#DIV/0!	#DIV/0!	#DIV/0!	#DIV/0!	#DIV/0!	#DIV/0!	#DIV/0!	#DIV/0!	#DIV/0!	#DIV/0!	#DIV/0!	#DIV/0!	#DIV/0!	#DIV/0!	#DIV/0!	#DIV/0!
[truncated: 3 more columns]

## Sheet: Isometric Optinalysis (A) 
	OPTINALYSIS: SEQUENCE ANALYSIS THROUGH A LOOKING-GLASS
	CN = Central node; Kc = Kabirian coefficient of similarity; PSim. = Probability level of similarity; PDsim. = Probability level of dissimilarity																NUM. = Numeration; DEN. = Denumeration
				For Kc >1		For Kc <1											For Kc >1			For Kc <1
Skewization value	RESULTS	CN	Kc	PSim.	PDsim.	PSim.	PDsim.										NUM	DEN		NUM	DEN
1000000	M1	21	20.2583	-0.310648	1.31065	-3.21908	4.21908		1	20.2583	1	-0.310648					-18.2583	58.7749		-58.7749	18.2583
	M2	21	10.3205	-0.287295	1.2873	-3.48074	4.48074		2	10.3205	2	-0.287295					-8.32051	28.9615		-28.9615	8.32051
	M3	21	6.92395	-0.262305	1.2623	-3.81236	4.81236		3	6.92395	3	-0.262305					-4.92395	18.7718		-18.7718	4.92395
	M4	21	5.20947	-0.235498	1.2355	-4.24631	5.24631		4	5.20947	4	-0.235498					-3.20947	13.6284		-13.6284	3.20947
	M5	21	4.17554	-0.20667	1.20667	-4.83862	5.83862		5	4.17554	5	-0.20667					-2.17554	10.5266		-10.5266	2.17554
	M6	21	3.48405	-0.175583	1.17558	-5.69532	6.69532		6	3.48405	6	-0.175583					-1.48405	8.45216		-8.45216	1.48405
	M7	21	2.98906	-0.14196	1.14196	-7.04426	8.04426		7	2.98906	7	-0.14196					-0.989056	6.96717		-6.96717	0.989056
	M8	21	2.61721	-0.105477	1.10548	-9.48073	10.4807		8	2.61721	8	-0.105477					-0.617214	5.85164		-5.85164	0.617214
	M9	21	2.32765	-0.0657545	1.06575	-15.2081	16.2081		9	2.32765	9	-0.0657545					-0.327652	4.98296		-4.98296	0.327652
	M10	21	2.09578	-0.0223401	1.02234	-44.7625	45.7625		10	2.09578	10	-0.0223401					-0.0957797	4.28734		-4.28734	0.0957797
	M11	21	1.90592	0.0253058	0.974694	39.5166	-38.5166		11	1.90592	11	0.0253058					0.094081	3.71776		-3.71776	-0.094081
	M12	21	1.7476	0.0778338	0.922166	12.8479	-11.8479		12	1.7476	12	0.0778338					0.252399	3.2428		-3.2428	-0.252399
	M13	21	1.61357	0.136034	0.863966	7.35108	-6.35108		13	1.61357	13	0.136034					0.386433	2.8407		-2.8407	-0.386433
	M14	21	1.49863	0.200879	0.799121	4.97811	-3.97811		14	1.49863	14	0.200879					0.501372	2.49588		-2.49588	-0.501372
	M15	21	1.39898	0.273575	0.726425	3.6553	-2.6553		15	1.39898	15	0.273575					0.601024	2.19693		-2.19693	-0.601024
	M16	21	1.31175	0.355639	0.644361	2.81184	-1.81184		16	1.31175	16	0.355639					0.68825	1.93525		-1.93525	-0.68825
	M17	21	1.23476	0.449008	0.550992	2.22713	-1.22713		17	1.23476	17	0.449008					0.765238	1.70429		-1.70429	-0.765238
	M18	21	1.16631	0.556189	0.443811	1.79795	-0.797951		18	1.16631	18	0.556189					0.833689	1.49893		-1.49893	-0.833689
	M19	21	1.10505	0.680492	0.319508	1.46952	-0.469525		19	1.10505	19	0.680492					0.89495	1.31515		-1.31515	-0.89495
	M20	21	1.0499	0.826378	0.173622	1.2101	-0.2101		20	1.0499	20	0.826378					0.950096	1.14971		-1.14971	-0.950096
	SEQUENCES	INPUT SEQUENCE																												SEQUENCES	COMPUTATION AND CALCULATIONS
	QUANTITATIVE SCALE	M1	M2	M3	M4	M5	M6	M7	M8	M9	M10	M11	M12	M13	M14	M15	M16	M17	M18	M19	M20									QUANTITATIVE SCALE	M1	M2	M3	M4	M5	M6	M7	M8	M9	M10	M11	M12	X	X	X	X	X	X	X
	1	25	25	25	25	25	25	25	25	25	25	25	25	25	25	25	25	25	25	25	25									1	1000025	25	25	25	25	25	25	25	25	25	25	25	25	25	25	25	25	25	25
	2	28	28	28	28	28	28	28	28	28	28	28	28	28	28	28	28	28	28	28	28									2	56	2000056	56	56	56	56	56	56	56	56	56	56	56	56	56	56	56	56	56
	3	15	15	15	15	15	15	15	15	15	15	15	15	15	15	15	15	15	15	15	15									3	45	45	3000045	45	45	45	45	45	45	45	45	45	45	45	45	45	45	45	45
	4	5	5	5	5	5	5	5	5	5	5	5	5	5	5	5	5	5	5	5	5									4	20	20	20	4000020	20	20	20	20	20	20	20	20	20	20	20	20	20	20	20
	5	55	55	55	55	55	55	55	55	55	55	55	55	55	55	55	55	55	55	55	55									5	275	275	275	275	5000275	275	275	275	275	275	275	275	275	275	275	275	275	275	275
	6	10	10	10	10	10	10	10	10	10	10	10	10	10	10	10	10	10	10	10	10									6	60	60	60	60	60	6000060	60	60	60	60	60	60	60	60	60	60	60	60	60
	7	33	33	33	33	33	33	33	33	33	33	33	33	33	33	33	33	33	33	33	33									7	231	231	231	231	231	231	7000231	231	231	231	231	231	231	231	231	231	231	231	231
	8	12	12	12	12	12	12	12	12	12	12	12	12	12	12	12	12	12	12	12	12									8	96	96	96	96	96	96	96	8000096	96	96	96	96	96	96	96	96	96	96	96
	9	70	70	70	70	70	70	70	70	70	70	70	70	70	70	70	70	70	70	70	70									9	630	630	630	630	630	630	630	630	9000630	630	630	630	630	630	630	630	630	630	630
	10	90	90	90	90	90	90	90	90	90	90	90	90	90	90	90	90	90	90	90	90									10	900	900	900	900	900	900	900	900	900	10000900	900	900	900	900	900	900	900	900	900
	11	45	45	45	45	45	45	45	45	45	45	45	45	45	45	45	45	45	45	45	45									11	495	495	495	495	495	495	495	495	495	495	11000495	495	495	495	495	495	495	495	495
	12	64	64	64	64	64	64	64	64	64	64	64	64	64	64	64	64	64	64	64	64									12	768	768	768	768	768	768	768	768	768	768	768	12000768	768	768	768	768	768	768	768
	13	23	23	23	23	23	23	23	23	23	23	23	23	23	23	23	23	23	23	23	23									13	299	299	299	299	299	299	299	299	299	299	299	299	13000299	299	299	299	299	299	299
	14	87	87	87	87	87	87	87	87	87	87	87	87	87	87	87	87	87	87	87	87									14	1218	1218	1218	1218	1218	1218	1218	1218	1218	1218	1218	1218	1218	14001218	1218	1218	1218	1218	1218
	15	67	67	67	67	67	67	67	67	67	67	67	67	67	67	67	67	67	67	67	67									15	1005	1005	1005	1005	1005	1005	1005	1005	1005	1005	1005	1005	1005	1005	15001005	1005	1005	1005	1005
	16	34	34	34	34	34	34	34	34	34	34	34	34	34	34	34	34	34	34	34	34									16	544	544	544	544	544	544	544	544	544	544	544	544	544	544	544	16000544	544	544	544
	17	97	97	97	97	97	97	97	97	97	97	97	97	97	97	97	97	97	97	97	97									17	1649	1649	1649	1649	1649	1649	1649	1649	1649	1649	1649	1649	1649	1649	1649	1649	17001649	1649	1649
	18	45	45	45	45	45	45	45	45	45	45	45	45	45	45	45	45	45	45	45	45									18	810	810	810	810	810	810	810	810	810	810	810	810	810	810	810	810	810	18000810	810
	19	34	34	34	34	34	34	34	34	34	34	34	34	34	34	34	34	34	34	34	34									19	646	646	646	646	646	646	646	646	646	646	646	646	646	646	646	646	646	646	19000646
	20	78	78	78	78	78	78	78	78	78	78	78	78	78	78	78	78	78	78	78	78									20	1560	1560	1560	1560	1560	1560	1560	1560	1560	1560	1560	1560	1560	1560	1560	1560	1560	1560	1560
	21	0	0	0	0	0	0	0	0	0	0	0	0	0	0	0	0	0	0	0	0									21	0	0	0	0	0	0	0	0	0	0	0	0	0	0	0	0	0	0	0
	22	78	78	78	78	78	78	78	78	78	78	78	78	78	78	78	78	78	78	78	78									22	1716	1716	1716	1716	1716	1716	1716	1716	1716	1716	1716	1716	1716	1716	1716	1716	1716	1716	1716
	23	34	34	34	34	34	34	34	34	34	34	34	34	34	34	34	34	34	34	34	34									23	782	782	782	782	782	782	782	782	782	782	782	782	782	782	782	782	782	782	782
	24	45	45	45	45	45	45	45	45	45	45	45	45	45	45	45	45	45	45	45	45									24	1080	1080	1080	1080	1080	1080	1080	1080	1080	1080	1080	1080	1080	1080	1080	1080	1080	1080	1080
	25	97	97	97	97	97	97	97	97	97	97	97	97	97	97	97	97	97	97	97	97									25	2425	2425	2425	2425	2425	2425	2425	2425	2425	2425	2425	2425	2425	2425	2425	2425	2425	2425	2425
	26	34	34	34	34	34	34	34	34	34	34	34	34	34	34	34	34	34	34	34	34									26	884	884	884	884	884	884	884	884	884	884	884	884	884	884	884	884	884	884	884
	27	67	67	67	67	67	67	67	67	67	67	67	67	67	67	67	67	67	67	67	67									27	1809	1809	1809	1809	1809	1809	1809	1809	1809	1809	1809	1809	1809	1809	1809	1809	1809	1809	1809
	28	87	87	87	87	87	87	87	87	87	87	87	87	87	87	87	87	87	87	87	87									28	2436	2436	2436	2436	2436	2436	2436	2436	2436	2436	2436	2436	2436	2436	2436	2436	2436	2436	2436
	29	23	23	23	23	23	23	23	23	23	23	23	23	23	23	23	23	23	23	23	23									29	667	667	667	667	667	667	667	667	667	667	667	667	667	667	667	667	667	667	667
	30	64	64	64	64	64	64	64	64	64	64	64	64	64	64	64	64	64	64	64	64									30	1920	1920	1920	1920	1920	1920	1920	1920	1920	1920	1920	1920	1920	1920	1920	1920	1920	1920	1920
	31	45	45	45	45	45	45	45	45	45	45	45	45	45	45	45	45	45	45	45	45									31	1395	1395	1395	1395	1395	1395	1395	1395	1395	1395	1395	1395	1395	1395	1395	1395	1395	1395	1395
	32	90	90	90	90	90	90	90	90	90	90	90	90	90	90	90	90	90	90	90	90									32	2880	2880	2880	2880	2880	2880	2880	2880	2880	2880	2880	2880	2880	2880	2880	2880	2880	2880	2880
	33	70	70	70	70	70	70	70	70	70	70	70	70	70	70	70	70	70	70	70	70									33	2310	2310	2310	2310	2310	2310	2310	2310	2310	2310	2310	2310	2310	2310	2310	2310	2310	2310	2310
	34	12	12	12	12	12	12	12	12	12	12	12	12	12	12	12	12	12	12	12	12									34	408	408	408	408	408	408	408	408	408	408	408	408	408	408	408	408	408	408	408
	35	33	33	33	33	33	33	33	33	33	33	33	33	33	33	33	33	33	33	33	33									35	1155	1155	1155	1155	1155	1155	1155	1155	1155	1155	1155	1155	1155	1155	1155	1155	1155	1155	1155
	36	10	10	10	10	10	10	10	10	10	10	10	10	10	10	10	10	10	10	10	10									36	360	360	360	360	360	360	360	360	360	360	360	360	360	360	360	360	360	360	360
	37	55	55	55	55	55	55	55	55	55	55	55	55	55	55	55	55	55	55	55	55									37	2035	2035	2035	2035	2035	2035	2035	2035	2035	2035	2035	2035	2035	2035	2035	2035	2035	2035	2035
	38	5	5	5	5	5	5	5	5	5	5	5	5	5	5	5	5	5	5	5	5									38	190	190	190	190	190	190	190	190	190	190	190	190	190	190	190	190	190	190	190
	39	15	15	15	15	15	15	15	15	15	15	15	15	15	15	15	15	15	15	15	15									39	585	585	585	585	585	585	585	585	585	585	585	585	585	585	585	585	585	585	585
	40	28	28	28	28	28	28	28	28	28	28	28	28	28	28	28	28	28	28	28	28									40	1120	1120	1120	1120	1120	1120	1120	1120	1120	1120	1120	1120	1120	1120	1120	1120	1120	1120	1120
	41	25	25	25	25	25	25	25	25	25	25	25	25	25	25	25	25	25	25	25	25									41	1025	1025	1025	1025	1025	1025	1025	1025	1025	1025	1025	1025	1025	1025	1025	1025	1025	1025	1025
	42	0	0	0	0	0	0	0	0	0	0	0	0	0	0	0	0	0	0	0	0									42	0	0	0	0	0	0	0	0	0	0	0	0	0	0	0	0	0	0	0
	43	0	0	0	0	0	0	0	0	0	0	0	0	0	0	0	0	0	0	0	0									43	0	0	0	0	0	0	0	0	0	0	0	0	0	0	0	0	0	0	0
	44	0	0	0	0	0	0	0	0	0	0	0	0	0	0	0	0	0	0	0	0									44	0	0	0	0	0	0	0	0	0	0	0	0	0	0	0	0	0	0	0
	45	0	0	0	0	0	0	0	0	0	0	0	0	0	0	0	0	0	0	0	0									45	0	0	0	0	0	0	0	0	0	0	0	0	0	0	0	0	0	0	0
	46	0	0	0	0	0	0	0	0	0	0	0	0	0	0	0	0	0	0	0	0									46	0	0	0	0	0	0	0	0	0	0	0	0	0	0	0	0	0	0	0
	47	0	0	0	0	0	0	0	0	0	0	0	0	0	0	0	0	0	0	0	0									47	0	0	0	0	0	0	0	0	0	0	0	0	0	0	0	0	0	0	0
	48	0	0	0	0	0	0	0	0	0	0	0	0	0	0	0	0	0	0	0	0									48	0	0	0	0	0	0	0	0	0	0	0	0	0	0	0	0	0	0	0
	49	0	0	0	0	0	0	0	0	0	0	0	0	0	0	0	0	0	0	0	0									49	0	0	0	0	0	0	0	0	0	0	0	0	0	0	0	0	0	0	0
	50	0	0	0	0	0	0	0	0	0	0	0	0	0	0	0	0	0	0	0	0									50	0	0	0	0	0	0	0	0	0	0	0	0	0	0	0	0	0	0	0
	51	0	0	0	0	0	0	0	0	0	0	0	0	0	0	0	0	0	0	0	0									51	0	0	0	0	0	0	0	0	0	0	0	0	0	0	0	0	0	0	0
	52	0	0	0	0	0	0	0	0	0	0	0	0	0	0	0	0	0	0	0	0									52	0	0	0	0	0	0	0	0	0	0	0	0	0	0	0	0	0	0	0
	53	0	0	0	0	0	0	0	0	0	0	0	0	0	0	0	0	0	0	0	0									53	0	0	0	0	0	0	0	0	0	0	0	0	0	0	0	0	0	0	0
	54	0	0	0	0	0	0	0	0	0	0	0	0	0	0	0	0	0	0	0	0									54	0	0	0	0	0	0	0	0	0	0	0	0	0	0	0	0	0	0	0
	55	0	0	0	0	0	0	0	0	0	0	0	0	0	0	0	0	0	0	0	0									55	0	0	0	0	0	0	0	0	0	0	0	0	0	0	0	0	0	0	0
	56	0	0	0	0	0	0	0	0	0	0	0	0	0	0	0	0	0	0	0	0									56	0	0	0	0	0	0	0	0	0	0	0	0	0	0	0	0	0	0	0
	57	0	0	0	0	0	0	0	0	0	0	0	0	0	0	0	0	0	0	0	0									57	0	0	0	0	0	0	0	0	0	0	0	0	0	0	0	0	0	0	0
	58	0	0	0	0	0	0	0	0	0	0	0	0	0	0	0	0	0	0	0	0									58	0	0	0	0	0	0	0	0	0	0	0	0	0	0	0	0	0	0	0
	59	0	0	0	0	0	0	0	0	0	0	0	0	0	0	0	0	0	0	0	0									59	0	0	0	0	0	0	0	0	0	0	0	0	0	0	0	0	0	0	0
	60	0	0	0	0	0	0	0	0	0	0	0	0	0	0	0	0	0	0	0	0									60	0	0	0	0	0	0	0	0	0	0	0	0	0	0	0	0	0	0	0
	61	0	0	0	0	0	0	0	0	0	0	0	0	0	0	0	0	0	0	0	0									61	0	0	0	0	0	0	0	0	0	0	0	0	0	0	0	0	0	0	0
	62	0	0	0	0	0	0	0	0	0	0	0	0	0	0	0	0	0	0	0	0									62	0	0	0	0	0	0	0	0	0	0	0	0	0	0	0	0	0	0	0
	63	0	0	0	0	0	0	0	0	0	0	0	0	0	0	0	0	0	0	0	0									63	0	0	0	0	0	0	0	0	0	0	0	0	0	0	0	0	0	0	0
	64	0	0	0	0	0	0	0	0	0	0	0	0	0	0	0	0	0	0	0	0									64	0	0	0	0	0	0	0	0	0	0	0	0	0	0	0	0	0	0	0
	65	0	0	0	0	0	0	0	0	0	0	0	0	0	0	0	0	0	0	0	0									65	0	0	0	0	0	0	0	0	0	0	0	0	0	0	0	0	0	0	0
	66	0	0	0	0	0	0	0	0	0	0	0	0	0	0	0	0	0	0	0	0									66	0	0	0	0	0	0	0	0	0	0	0	0	0	0	0	0	0	0	0
	67	0	0	0	0	0	0	0	0	0	0	0	0	0	0	0	0	0	0	0	0									67	0	0	0	0	0	0	0	0	0	0	0	0	0	0	0	0	0	0	0
	68	0	0	0	0	0	0	0	0	0	0	0	0	0	0	0	0	0	0	0	0									68	0	0	0	0	0	0	0	0	0	0	0	0	0	0	0	0	0	0	0
	69	0	0	0	0	0	0	0	0	0	0	0	0	0	0	0	0	0	0	0	0									69	0	0	0	0	0	0	0	0	0	0	0	0	0	0	0	0	0	0	0
	70	0	0	0	0	0	0	0	0	0	0	0	0	0	0	0	0	0	0	0	0									70	0	0	0	0	0	0	0	0	0	0	0	0	0	0	0	0	0	0	0
	71	0	0	0	0	0	0	0	0	0	0	0	0	0	0	0	0	0	0	0	0									71	0	0	0	0	0	0	0	0	0	0	0	0	0	0	0	0	0	0	0
	72	0	0	0	0	0	0	0	0	0	0	0	0	0	0	0	0	0	0	0	0									72	0	0	0	0	0	0	0	0	0	0	0	0	0	0	0	0	0	0	0
	73	0	0	0	0	0	0	0	0	0	0	0	0	0	0	0	0	0	0	0	0									73	0	0	0	0	0	0	0	0	0	0	0	0	0	0	0	0	0	0	0
	74	0	0	0	0	0	0	0	0	0	0	0	0	0	0	0	0	0	0	0	0									74	0	0	0	0	0	0	0	0	0	0	0	0	0	0	0	0	0	0	0
	75	0	0	0	0	0	0	0	0	0	0	0	0	0	0	0	0	0	0	0	0									75	0	0	0	0	0	0	0	0	0	0	0	0	0	0	0	0	0	0	0
	76	0	0	0	0	0	0	0	0	0	0	0	0	0	0	0	0	0	0	0	0									76	0	0	0	0	0	0	0	0	0	0	0	0	0	0	0	0	0	0	0
	77	0	0	0	0	0	0	0	0	0	0	0	0	0	0	0	0	0	0	0	0									77	0	0	0	0	0	0	0	0	0	0	0	0	0	0	0	0	0	0	0
	78	0	0	0	0	0	0	0	0	0	0	0	0	0	0	0	0	0	0	0	0									78	0	0	0	0	0	0	0	0	0	0	0	0	0	0	0	0	0	0	0
	79	0	0	0	0	0	0	0	0	0	0	0	0	0	0	0	0	0	0	0	0									79	0	0	0	0	0	0	0	0	0	0	0	0	0	0	0	0	0	0	0
	80	0	0	0	0	0	0	0	0	0	0	0	0	0	0	0	0	0	0	0	0									80	0	0	0	0	0	0	0	0	0	0	0	0	0	0	0	0	0	0	0
	81	0	0	0	0	0	0	0	0	0	0	0	0	0	0	0	0	0	0	0	0									81	0	0	0	0	0	0	0	0	0	0	0	0	0	0	0	0	0	0	0
	82	0	0	0	0	0	0	0	0	0	0	0	0	0	0	0	0	0	0	0	0									82	0	0	0	0	0	0	0	0	0	0	0	0	0	0	0	0	0	0	0
	83	0	0	0	0	0	0	0	0	0	0	0	0	0	0	0	0	0	0	0	0									83	0	0	0	0	0	0	0	0	0	0	0	0	0	0	0	0	0	0	0
	84	0	0	0	0	0	0	0	0	0	0	0	0	0	0	0	0	0	0	0	0									84	0	0	0	0	0	0	0	0	0	0	0	0	0	0	0	0	0	0	0
	85	0	0	0	0	0	0	0	0	0	0	0	0	0	0	0	0	0	0	0	0									85	0	0	0	0	0	0	0	0	0	0	0	0	0	0	0	0	0	0	0
	86	0	0	0	0	0	0	0	0	0	0	0	0	0	0	0	0	0	0	0	0									86	0	0	0	0	0	0	0	0	0	0	0	0	0	0	0	0	0	0	0
	87	0	0	0	0	0	0	0	0	0	0	0	0	0	0	0	0	0	0	0	0									87	0	0	0	0	0	0	0	0	0	0	0	0	0	0	0	0	0	0	0
	88	0	0	0	0	0	0	0	0	0	0	0	0	0	0	0	0	0	0	0	0									88	0	0	0	0	0	0	0	0	0	0	0	0	0	0	0	0	0	0	0
	89	0	0	0	0	0	0	0	0	0	0	0	0	0	0	0	0	0	0	0	0									89	0	0	0	0	0	0	0	0	0	0	0	0	0	0	0	0	0	0	0
	90	0	0	0	0	0	0	0	0	0	0	0	0	0	0	0	0	0	0	0	0									90	0	0	0	0	0	0	0	0	0	0	0	0	0	0	0	0	0	0	0
	91	0	0	0	0	0	0	0	0	0	0	0	0	0	0	0	0	0	0	0	0									91	0	0	0	0	0	0	0	0	0	0	0	0	0	0	0	0	0	0	0
	92	0	0	0	0	0	0	0	0	0	0	0	0	0	0	0	0	0	0	0	0									92	0	0	0	0	0	0	0	0	0	0	0	0	0	0	0	0	0	0	0
	93	0	0	0	0	0	0	0	0	0	0	0	0	0	0	0	0	0	0	0	0									93	0	0	0	0	0	0	0	0	0	0	0	0	0	0	0	0	0	0	0
	94	0	0	0	0	0	0	0	0	0	0	0	0	0	0	0	0	0	0	0	0									94	0	0	0	0	0	0	0	0	0	0	0	0	0	0	0	0	0	0	0
	95	0	0	0	0	0	0	0	0	0	0	0	0	0	0	0	0	0	0	0	0									95	0	0	0	0	0	0	0	0	0	0	0	0	0	0	0	0	0	0	0
	96	0	0	0	0	0	0	0	0	0	0	0	0	0	0	0	0	0	0	0	0									96	0	0	0	0	0	0	0	0	0	0	0	0	0	0	0	0	0	0	0
	97	0	0	0	0	0	0	0	0	0	0	0	0	0	0	0	0	0	0	0	0									97	0	0	0	0	0	0	0	0	0	0	0	0	0	0	0	0	0	0	0
	98	0	0	0	0	0	0	0	0	0	0	0	0	0	0	0	0	0	0	0	0									98	0	0	0	0	0	0	0	0	0	0	0	0	0	0	0	0	0	0	0
	99	0	0	0	0	0	0	0	0	0	0	0	0	0	0	0	0	0	0	0	0									99	0	0	0	0	0	0	0	0	0	0	0	0	0	0	0	0	0	0	0
	100	0	0	0	0	0	0	0	0	0	0	0	0	0	0	0	0	0	0	0	0									100	0	0	0	0	0	0	0	0	0	0	0	0	0	0	0	0	0	0	0
	101	0	0	0	0	0	0	0	0	0	0	0	0	0	0	0	0	0	0	0	0									101	0	0	0	0	0	0	0	0	0	0	0	0	0	0	0	0	0	0	0
	102	0	0	0	0	0	0	0	0	0	0	0	0	0	0	0	0	0	0	0	0									102	0	0	0	0	0	0	0	0	0	0	0	0	0	0	0	0	0	0	0
	103	0	0	0	0	0	0	0	0	0	0	0	0	0	0	0	0	0	0	0	0									103	0	0	0	0	0	0	0	0	0	0	0	0	0	0	0	0	0	0	0
	104	0	0	0	0	0	0	0	0	0	0	0	0	0	0	0	0	0	0	0	0									104	0	0	0	0	0	0	0	0	0	0	0	0	0	0	0	0	0	0	0
	105	0	0	0	0	0	0	0	0	0	0	0	0	0	0	0	0	0	0	0	0									105	0	0	0	0	0	0	0	0	0	0	0	0	0	0	0	0	0	0	0
	106	0	0	0	0	0	0	0	0	0	0	0	0	0	0	0	0	0	0	0	0									106	0	0	0	0	0	0	0	0	0	0	0	0	0	0	0	0	0	0	0
	107	0	0	0	0	0	0	0	0	0	0	0	0	0	0	0	0	0	0	0	0									107	0	0	0	0	0	0	0	0	0	0	0	0	0	0	0	0	0	0	0
	108	0	0	0	0	0	0	0	0	0	0	0	0	0	0	0	0	0	0	0	0									108	0	0	0	0	0	0	0	0	0	0	0	0	0	0	0	0	0	0	0
	109	0	0	0	0	0	0	0	0	0	0	0	0	0	0	0	0	0	0	0	0									109	0	0	0	0	0	0	0	0	0	0	0	0	0	0	0	0	0	0	0
	110	0	0	0	0	0	0	0	0	0	0	0	0	0	0	0	0	0	0	0	0									110	0	0	0	0	0	0	0	0	0	0	0	0	0	0	0	0	0	0	0
	111	0	0	0	0	0	0	0	0	0	0	0	0	0	0	0	0	0	0	0	0									111	0	0	0	0	0	0	0	0	0	0	0	0	0	0	0	0	0	0	0
	112	0	0	0	0	0	0	0	0	0	0	0	0	0	0	0	0	0	0	0	0									112	0	0	0	0	0	0	0	0	0	0	0	0	0	0	0	0	0	0	0
	113	0	0	0	0	0	0	0	0	0	0	0	0	0	0	0	0	0	0	0	0									113	0	0	0	0	0	0	0	0	0	0	0	0	0	0	0	0	0	0	0
	114	0	0	0	0	0	0	0	0	0	0	0	0	0	0	0	0	0	0	0	0									114	0	0	0	0	0	0	0	0	0	0	0	0	0	0	0	0	0	0	0
	115	0	0	0	0	0	0	0	0	0	0	0	0	0	0	0	0	0	0	0	0									115	0	0	0	0	0	0	0	0	0	0	0	0	0	0	0	0	0	0	0
	116	0	0	0	0	0	0	0	0	0	0	0	0	0	0	0	0	0	0	0	0									116	0	0	0	0	0	0	0	0	0	0	0	0	0	0	0	0	0	0	0
	117	0	0	0	0	0	0	0	0	0	0	0	0	0	0	0	0	0	0	0	0									117	0	0	0	0	0	0	0	0	0	0	0	0	0	0	0	0	0	0	0
	118	0	0	0	0	0	0	0	0	0	0	0	0	0	0	0	0	0	0	0	0									118	0	0	0	0	0	0	0	0	0	0	0	0	0	0	0	0	0	0	0
	119	0	0	0	0	0	0	0	0	0	0	0	0	0	0	0	0	0	0	0	0									119	0	0	0	0	0	0	0	0	0	0	0	0	0	0	0	0	0	0	0
	120	0	0	0	0	0	0	0	0	0	0	0	0	0	0	0	0	0	0	0	0									120	0	0	0	0	0	0	0	0	0	0	0	0	0	0	0	0	0	0	0
	121	0	0	0	0	0	0	0	0	0	0	0	0	0	0	0	0	0	0	0	0									121	0	0	0	0	0	0	0	0	0	0	0	0	0	0	0	0	0	0	0
	122	0	0	0	0	0	0	0	0	0	0	0	0	0	0	0	0	0	0	0	0									122	0	0	0	0	0	0	0	0	0	0	0	0	0	0	0	0	0	0	0
	123	0	0	0	0	0	0	0	0	0	0	0	0	0	0	0	0	0	0	0	0									123	0	0	0	0	0	0	0	0	0	0	0	0	0	0	0	0	0	0	0
	124	0	0	0	0	0	0	0	0	0	0	0	0	0	0	0	0	0	0	0	0									124	0	0	0	0	0	0	0	0	0	0	0	0	0	0	0	0	0	0	0
	125	0	0	0	0	0	0	0	0	0	0	0	0	0	0	0	0	0	0	0	0									125	0	0	0	0	0	0	0	0	0	0	0	0	0	0	0	0	0	0	0
	126	0	0	0	0	0	0	0	0	0	0	0	0	0	0	0	0	0	0	0	0									126	0	0	0	0	0	0	0	0	0	0	0	0	0	0	0	0	0	0	0
	127	0	0	0	0	0	0	0	0	0	0	0	0	0	0	0	0	0	0	0	0									127	0	0	0	0	0	0	0	0	0	0	0	0	0	0	0	0	0	0	0
	128	0	0	0	0	0	0	0	0	0	0	0	0	0	0	0	0	0	0	0	0									128	0	0	0	0	0	0	0	0	0	0	0	0	0	0	0	0	0	0	0
	129	0	0	0	0	0	0	0	0	0	0	0	0	0	0	0	0	0	0	0	0									129	0	0	0	0	0	0	0	0	0	0	0	0	0	0	0	0	0	0	0
	130	0	0	0	0	0	0	0	0	0	0	0	0	0	0	0	0	0	0	0	0									130	0	0	0	0	0	0	0	0	0	0	0	0	0	0	0	0	0	0	0
	131	0	0	0	0	0	0	0	0	0	0	0	0	0	0	0	0	0	0	0	0									131	0	0	0	0	0	0	0	0	0	0	0	0	0	0	0	0	0	0	0
	132	0	0	0	0	0	0	0	0	0	0	0	0	0	0	0	0	0	0	0	0									132	0	0	0	0	0	0	0	0	0	0	0	0	0	0	0	0	0	0	0
	133	0	0	0	0	0	0	0	0	0	0	0	0	0	0	0	0	0	0	0	0									133	0	0	0	0	0	0	0	0	0	0	0	0	0	0	0	0	0	0	0
	134	0	0	0	0	0	0	0	0	0	0	0	0	0	0	0	0	0	0	0	0									134	0	0	0	0	0	0	0	0	0	0	0	0	0	0	0	0	0	0	0
	135	0	0	0	0	0	0	0	0	0	0	0	0	0	0	0	0	0	0	0	0									135	0	0	0	0	0	0	0	0	0	0	0	0	0	0	0	0	0	0	0
	136	0	0	0	0	0	0	0	0	0	0	0	0	0	0	0	0	0	0	0	0									136	0	0	0	0	0	0	0	0	0	0	0	0	0	0	0	0	0	0	0
	137	0	0	0	0	0	0	0	0	0	0	0	0	0	0	0	0	0	0	0	0									137	0	0	0	0	0	0	0	0	0	0	0	0	0	0	0	0	0	0	0
	138	0	0	0	0	0	0	0	0	0	0	0	0	0	0	0	0	0	0	0	0									138	0	0	0	0	0	0	0	0	0	0	0	0	0	0	0	0	0	0	0
	139	0	0	0	0	0	0	0	0	0	0	0	0	0	0	0	0	0	0	0	0									139	0	0	0	0	0	0	0	0	0	0	0	0	0	0	0	0	0	0	0
	140	0	0	0	0	0	0	0	0	0	0	0	0	0	0	0	0	0	0	0	0									140	0	0	0	0	0	0	0	0	0	0	0	0	0	0	0	0	0	0	0
	141	0	0	0	0	0	0	0	0	0	0	0	0	0	0	0	0	0	0	0	0									141	0	0	0	0	0	0	0	0	0	0	0	0	0	0	0	0	0	0	0
	142	0	0	0	0	0	0	0	0	0	0	0	0	0	0	0	0	0	0	0	0									142	0	0	0	0	0	0	0	0	0	0	0	0	0	0	0	0	0	0	0
	143	0	0	0	0	0	0	0	0	0	0	0	0	0	0	0	0	0	0	0	0									143	0	0	0	0	0	0	0	0	0	0	0	0	0	0	0	0	0	0	0
	144	0	0	0	0	0	0	0	0	0	0	0	0	0	0	0	0	0	0	0	0									144	0	0	0	0	0	0	0	0	0	0	0	0	0	0	0	0	0	0	0
	145	0	0	0	0	0	0	0	0	0	0	0	0	0	0	0	0	0	0	0	0									145	0	0	0	0	0	0	0	0	0	0	0	0	0	0	0	0	0	0	0
	146	0	0	0	0	0	0	0	0	0	0	0	0	0	0	0	0	0	0	0	0									146	0	0	0	0	0	0	0	0	0	0	0	0	0	0	0	0	0	0	0
	147	0	0	0	0	0	0	0	0	0	0	0	0	0	0	0	0	0	0	0	0									147	0	0	0	0	0	0	0	0	0	0	0	0	0	0	0	0	0	0	0
	148	0	0	0	0	0	0	0	0	0	0	0	0	0	0	0	0	0	0	0	0									148	0	0	0	0	0	0	0	0	0	0	0	0	0	0	0	0	0	0	0
	149	0	0	0	0	0	0	0	0	0	0	0	0	0	0	0	0	0	0	0	0									149	0	0	0	0	0	0	0	0	0	0	0	0	0	0	0	0	0	0	0
	150	0	0	0	0	0	0	0	0	0	0	0	0	0	0	0	0	0	0	0	0									150	0	0	0	0	0	0	0	0	0	0	0	0	0	0	0	0	0	0	0
	151	0	0	0	0	0	0	0	0	0	0	0	0	0	0	0	0	0	0	0	0									151	0	0	0	0	0	0	0	0	0	0	0	0	0	0	0	0	0	0	0
	152	0	0	0	0	0	0	0	0	0	0	0	0	0	0	0	0	0	0	0	0									152	0	0	0	0	0	0	0	0	0	0	0	0	0	0	0	0	0	0	0
	153	0	0	0	0	0	0	0	0	0	0	0	0	0	0	0	0	0	0	0	0									153	0	0	0	0	0	0	0	0	0	0	0	0	0	0	0	0	0	0	0
	154	0	0	0	0	0	0	0	0	0	0	0	0	0	0	0	0	0	0	0	0									154	0	0	0	0	0	0	0	0	0	0	0	0	0	0	0	0	0	0	0
	155	0	0	0	0	0	0	0	0	0	0	0	0	0	0	0	0	0	0	0	0									155	0	0	0	0	0	0	0	0	0	0	0	0	0	0	0	0	0	0	0
	156	0	0	0	0	0	0	0	0	0	0	0	0	0	0	0	0	0	0	0	0									156	0	0	0	0	0	0	0	0	0	0	0	0	0	0	0	0	0	0	0
	157	0	0	0	0	0	0	0	0	0	0	0	0	0	0	0	0	0	0	0	0									157	0	0	0	0	0	0	0	0	0	0	0	0	0	0	0	0	0	0	0
	158	0	0	0	0	0	0	0	0	0	0	0	0	0	0	0	0	0	0	0	0									158	0	0	0	0	0	0	0	0	0	0	0	0	0	0	0	0	0	0	0
	159	0	0	0	0	0	0	0	0	0	0	0	0	0	0	0	0	0	0	0	0									159	0	0	0	0	0	0	0	0	0	0	0	0	0	0	0	0	0	0	0
	160	0	0	0	0	0	0	0	0	0	0	0	0	0	0	0	0	0	0	0	0									160	0	0	0	0	0	0	0	0	0	0	0	0	0	0	0	0	0	0	0
	161	0	0	0	0	0	0	0	0	0	0	0	0	0	0	0	0	0	0	0	0									161	0	0	0	0	0	0	0	0	0	0	0	0	0	0	0	0	0	0	0
	162	0	0	0	0	0	0	0	0	0	0	0	0	0	0	0	0	0	0	0	0									162	0	0	0	0	0	0	0	0	0	0	0	0	0	0	0	0	0	0	0
	163	0	0	0	0	0	0	0	0	0	0	0	0	0	0	0	0	0	0	0	0									163	0	0	0	0	0	0	0	0	0	0	0	0	0	0	0	0	0	0	0
	164	0	0	0	0	0	0	0	0	0	0	0	0	0	0	0	0	0	0	0	0									164	0	0	0	0	0	0	0	0	0	0	0	0	0	0	0	0	0	0	0
	165	0	0	0	0	0	0	0	0	0	0	0	0	0	0	0	0	0	0	0	0									165	0	0	0	0	0	0	0	0	0	0	0	0	0	0	0	0	0	0	0
	166	0	0	0	0	0	0	0	0	0	0	0	0	0	0	0	0	0	0	0	0									166	0	0	0	0	0	0	0	0	0	0	0	0	0	0	0	0	0	0	0
	167	0	0	0	0	0	0	0	0	0	0	0	0	0	0	0	0	0	0	0	0									167	0	0	0	0	0	0	0	0	0	0	0	0	0	0	0	0	0	0	0
	168	0	0	0	0	0	0	0	0	0	0	0	0	0	0	0	0	0	0	0	0									168	0	0	0	0	0	0	0	0	0	0	0	0	0	0	0	0	0	0	0
	169	0	0	0	0	0	0	0	0	0	0	0	0	0	0	0	0	0	0	0	0									169	0	0	0	0	0	0	0	0	0	0	0	0	0	0	0	0	0	0	0
	170	0	0	0	0	0	0	0	0	0	0	0	0	0	0	0	0	0	0	0	0									170	0	0	0	0	0	0	0	0	0	0	0	0	0	0	0	0	0	0	0
	171	0	0	0	0	0	0	0	0	0	0	0	0	0	0	0	0	0	0	0	0									171	0	0	0	0	0	0	0	0	0	0	0	0	0	0	0	0	0	0	0
	172	0	0	0	0	0	0	0	0	0	0	0	0	0	0	0	0	0	0	0	0									172	0	0	0	0	0	0	0	0	0	0	0	0	0	0	0	0	0	0	0
	173	0	0	0	0	0	0	0	0	0	0	0	0	0	0	0	0	0	0	0	0									173	0	0	0	0	0	0	0	0	0	0	0	0	0	0	0	0	0	0	0
	174	0	0	0	0	0	0	0	0	0	0	0	0	0	0	0	0	0	0	0	0									174	0	0	0	0	0	0	0	0	0	0	0	0	0	0	0	0	0	0	0
	175	0	0	0	0	0	0	0	0	0	0	0	0	0	0	0	0	0	0	0	0									175	0	0	0	0	0	0	0	0	0	0	0	0	0	0	0	0	0	0	0
	176	0	0	0	0	0	0	0	0	0	0	0	0	0	0	0	0	0	0	0	0									176	0	0	0	0	0	0	0	0	0	0	0	0	0	0	0	0	0	0	0
	177	0	0	0	0	0	0	0	0	0	0	0	0	0	0	0	0	0	0	0	0									177	0	0	0	0	0	0	0	0	0	0	0	0	0	0	0	0	0	0	0
	178	0	0	0	0	0	0	0	0	0	0	0	0	0	0	0	0	0	0	0	0									178	0	0	0	0	0	0	0	0	0	0	0	0	0	0	0	0	0	0	0
	179	0	0	0	0	0	0	0	0	0	0	0	0	0	0	0	0	0	0	0	0									179	0	0	0	0	0	0	0	0	0	0	0	0	0	0	0	0	0	0	0
	180	0	0	0	0	0	0	0	0	0	0	0	0	0	0	0	0	0	0	0	0									180	0	0	0	0	0	0	0	0	0	0	0	0	0	0	0	0	0	0	0
	181	0	0	0	0	0	0	0	0	0	0	0	0	0	0	0	0	0	0	0	0									181	0	0	0	0	0	0	0	0	0	0	0	0	0	0	0	0	0	0	0
	182	0	0	0	0	0	0	0	0	0	0	0	0	0	0	0	0	0	0	0	0									182	0	0	0	0	0	0	0	0	0	0	0	0	0	0	0	0	0	0	0
	183	0	0	0	0	0	0	0	0	0	0	0	0	0	0	0	0	0	0	0	0									183	0	0	0	0	0	0	0	0	0	0	0	0	0	0	0	0	0	0	0
	184	0	0	0	0	0	0	0	0	0	0	0	0	0	0	0	0	0	0	0	0									184	0	0	0	0	0	0	0	0	0	0	0	0	0	0	0	0	0	0	0
	185	0	0	0	0	0	0	0	0	0	0	0	0	0	0	0	0	0	0	0	0									185	0	0	0	0	0	0	0	0	0	0	0	0	0	0	0	0	0	0	0
	186	0	0	0	0	0	0	0	0	0	0	0	0	0	0	0	0	0	0	0	0									186	0	0	0	0	0	0	0	0	0	0	0	0	0	0	0	0	0	0	0
	187	0	0	0	0	0	0	0	0	0	0	0	0	0	0	0	0	0	0	0	0									187	0	0	0	0	0	0	0	0	0	0	0	0	0	0	0	0	0	0	0
	188	0	0	0	0	0	0	0	0	0	0	0	0	0	0	0	0	0	0	0	0									188	0	0	0	0	0	0	0	0	0	0	0	0	0	0	0	0	0	0	0
	189	0	0	0	0	0	0	0	0	0	0	0	0	0	0	0	0	0	0	0	0									189	0	0	0	0	0	0	0	0	0	0	0	0	0	0	0	0	0	0	0
	190	0	0	0	0	0	0	0	0	0	0	0	0	0	0	0	0	0	0	0	0									190	0	0	0	0	0	0	0	0	0	0	0	0	0	0	0	0	0	0	0
	191	0	0	0	0	0	0	0	0	0	0	0	0	0	0	0	0	0	0	0	0									191	0	0	0	0	0	0	0	0	0	0	0	0	0	0	0	0	0	0	0
	192	0	0	0	0	0	0	0	0	0	0	0	0	0	0	0	0	0	0	0	0									192	0	0	0	0	0	0	0	0	0	0	0	0	0	0	0	0	0	0	0
	193	0	0	0	0	0	0	0	0	0	0	0	0	0	0	0	0	0	0	0	0									193	0	0	0	0	0	0	0	0	0	0	0	0	0	0	0	0	0	0	0
	194	0	0	0	0	0	0	0	0	0	0	0	0	0	0	0	0	0	0	0	0									194	0	0	0	0	0	0	0	0	0	0	0	0	0	0	0	0	0	0	0
	195	0	0	0	0	0	0	0	0	0	0	0	0	0	0	0	0	0	0	0	0									195	0	0	0	0	0	0	0	0	0	0	0	0	0	0	0	0	0	0	0
	196	0	0	0	0	0	0	0	0	0	0	0	0	0	0	0	0	0	0	0	0									196	0	0	0	0	0	0	0	0	0	0	0	0	0	0	0	0	0	0	0
	197	0	0	0	0	0	0	0	0	0	0	0	0	0	0	0	0	0	0	0	0									197	0	0	0	0	0	0	0	0	0	0	0	0	0	0	0	0	0	0	0
	198	0	0	0	0	0	0	0	0	0	0	0	0	0	0	0	0	0	0	0	0									198	0	0	0	0	0	0	0	0	0	0	0	0	0	0	0	0	0	0	0
	199	0	0	0	0	0	0	0	0	0	0	0	0	0	0	0	0	0	0	0	0									199	0	0	0	0	0	0	0	0	0	0	0	0	0	0	0	0	0	0	0
	200	0	0	0	0	0	0	0	0	0	0	0	0	0	0	0	0	0	0	0	0									200	0	0	0	0	0	0	0	0	0	0	0	0	0	0	0	0	0	0	0
	201	0	0	0	0	0	0	0	0	0	0	0	0	0	0	0	0	0	0	0	0									201	0	0	0	0	0	0	0	0	0	0	0	0	0	0	0	0	0	0	0
	202	0	0	0	0	0	0	0	0	0	0	0	0	0	0	0	0	0	0	0	0									202	0	0	0	0	0	0	0	0	0	0	0	0	0	0	0	0	0	0	0
	203	0	0	0	0	0	0	0	0	0	0	0	0	0	0	0	0	0	0	0	0									203	0	0	0	0	0	0	0	0	0	0	0	0	0	0	0	0	0	0	0
	204	0	0	0	0	0	0	0	0	0	0	0	0	0	0	0	0	0	0	0	0									204	0	0	0	0	0	0	0	0	0	0	0	0	0	0	0	0	0	0	0
	205	0	0	0	0	0	0	0	0	0	0	0	0	0	0	0	0	0	0	0	0									205	0	0	0	0	0	0	0	0	0	0	0	0	0	0	0	0	0	0	0
	206	0	0	0	0	0	0	0	0	0	0	0	0	0	0	0	0	0	0	0	0									206	0	0	0	0	0	0	0	0	0	0	0	0	0	0	0	0	0	0	0
	207	0	0	0	0	0	0	0	0	0	0	0	0	0	0	0	0	0	0	0	0									207	0	0	0	0	0	0	0	0	0	0	0	0	0	0	0	0	0	0	0
	208	0	0	0	0	0	0	0	0	0	0	0	0	0	0	0	0	0	0	0	0									208	0	0	0	0	0	0	0	0	0	0	0	0	0	0	0	0	0	0	0
	209	0	0	0	0	0	0	0	0	0	0	0	0	0	0	0	0	0	0	0	0									209	0	0	0	0	0	0	0	0	0	0	0	0	0	0	0	0	0	0	0
	210	0	0	0	0	0	0	0	0	0	0	0	0	0	0	0	0	0	0	0	0									210	0	0	0	0	0	0	0	0	0	0	0	0	0	0	0	0	0	0	0
	211	0	0	0	0	0	0	0	0	0	0	0	0	0	0	0	0	0	0	0	0									211	0	0	0	0	0	0	0	0	0	0	0	0	0	0	0	0	0	0	0
	212	0	0	0	0	0	0	0	0	0	0	0	0	0	0	0	0	0	0	0	0									212	0	0	0	0	0	0	0	0	0	0	0	0	0	0	0	0	0	0	0
	213	0	0	0	0	0	0	0	0	0	0	0	0	0	0	0	0	0	0	0	0									213	0	0	0	0	0	0	0	0	0	0	0	0	0	0	0	0	0	0	0
	214	0	0	0	0	0	0	0	0	0	0	0	0	0	0	0	0	0	0	0	0									214	0	0	0	0	0	0	0	0	0	0	0	0	0	0	0	0	0	0	0
	215	0	0	0	0	0	0	0	0	0	0	0	0	0	0	0	0	0	0	0	0									215	0	0	0	0	0	0	0	0	0	0	0	0	0	0	0	0	0	0	0
	216	0	0	0	0	0	0	0	0	0	0	0	0	0	0	0	0	0	0	0	0									216	0	0	0	0	0	0	0	0	0	0	0	0	0	0	0	0	0	0	0
	217	0	0	0	0	0	0	0	0	0	0	0	0	0	0	0	0	0	0	0	0									217	0	0	0	0	0	0	0	0	0	0	0	0	0	0	0	0	0	0	0
	218	0	0	0	0	0	0	0	0	0	0	0	0	0	0	0	0	0	0	0	0									218	0	0	0	0	0	0	0	0	0	0	0	0	0	0	0	0	0	0	0
	219	0	0	0	0	0	0	0	0	0	0	0	0	0	0	0	0	0	0	0	0									219	0	0	0	0	0	0	0	0	0	0	0	0	0	0	0	0	0	0	0
	220	0	0	0	0	0	0	0	0	0	0	0	0	0	0	0	0	0	0	0	0									220	0	0	0	0	0	0	0	0	0	0	0	0	0	0	0	0	0	0	0
	221	0	0	0	0	0	0	0	0	0	0	0	0	0	0	0	0	0	0	0	0									221	0	0	0	0	0	0	0	0	0	0	0	0	0	0	0	0	0	0	0
	222	0	0	0	0	0	0	0	0	0	0	0	0	0	0	0	0	0	0	0	0									222	0	0	0	0	0	0	0	0	0	0	0	0	0	0	0	0	0	0	0
	223	0	0	0	0	0	0	0	0	0	0	0	0	0	0	0	0	0	0	0	0									223	0	0	0	0	0	0	0	0	0	0	0	0	0	0	0	0	0	0	0
	224	0	0	0	0	0	0	0	0	0	0	0	0	0	0	0	0	0	0	0	0									224	0	0	0	0	0	0	0	0	0	0	0	0	0	0	0	0	0	0	0
	225	0	0	0	0	0	0	0	0	0	0	0	0	0	0	0	0	0	0	0	0									225	0	0	0	0	0	0	0	0	0	0	0	0	0	0	0	0	0	0	0
	226	0	0	0	0	0	0	0	0	0	0	0	0	0	0	0	0	0	0	0	0									226	0	0	0	0	0	0	0	0	0	0	0	0	0	0	0	0	0	0	0
	227	0	0	0	0	0	0	0	0	0	0	0	0	0	0	0	0	0	0	0	0									227	0	0	0	0	0	0	0	0	0	0	0	0	0	0	0	0	0	0	0
	228	0	0	0	0	0	0	0	0	0	0	0	0	0	0	0	0	0	0	0	0									228	0	0	0	0	0	0	0	0	0	0	0	0	0	0	0	0	0	0	0
	229	0	0	0	0	0	0	0	0	0	0	0	0	0	0	0	0	0	0	0	0									229	0	0	0	0	0	0	0	0	0	0	0	0	0	0	0	0	0	0	0
	230	0	0	0	0	0	0	0	0	0	0	0	0	0	0	0	0	0	0	0	0									230	0	0	0	0	0	0	0	0	0	0	0	0	0	0	0	0	0	0	0
	231	0	0	0	0	0	0	0	0	0	0	0	0	0	0	0	0	0	0	0	0									231	0	0	0	0	0	0	0	0	0	0	0	0	0	0	0	0	0	0	0
	232	0	0	0	0	0	0	0	0	0	0	0	0	0	0	0	0	0	0	0	0									232	0	0	0	0	0	0	0	0	0	0	0	0	0	0	0	0	0	0	0
	233	0	0	0	0	0	0	0	0	0	0	0	0	0	0	0	0	0	0	0	0									233	0	0	0	0	0	0	0	0	0	0	0	0	0	0	0	0	0	0	0
	234	0	0	0	0	0	0	0	0	0	0	0	0	0	0	0	0	0	0	0	0									234	0	0	0	0	0	0	0	0	0	0	0	0	0	0	0	0	0	0	0
	235	0	0	0	0	0	0	0	0	0	0	0	0	0	0	0	0	0	0	0	0									235	0	0	0	0	0	0	0	0	0	0	0	0	0	0	0	0	0	0	0
	236	0	0	0	0	0	0	0	0	0	0	0	0	0	0	0	0	0	0	0	0									236	0	0	0	0	0	0	0	0	0	0	0	0	0	0	0	0	0	0	0
	237	0	0	0	0	0	0	0	0	0	0	0	0	0	0	0	0	0	0	0	0									237	0	0	0	0	0	0	0	0	0	0	0	0	0	0	0	0	0	0	0
	238	0	0	0	0	0	0	0	0	0	0	0	0	0	0	0	0	0	0	0	0									238	0	0	0	0	0	0	0	0	0	0	0	0	0	0	0	0	0	0	0
	239	0	0	0	0	0	0	0	0	0	0	0	0	0	0	0	0	0	0	0	0									239	0	0	0	0	0	0	0	0	0	0	0	0	0	0	0	0	0	0	0
	240	0	0	0	0	0	0	0	0	0	0	0	0	0	0	0	0	0	0	0	0									240	0	0	0	0	0	0	0	0	0	0	0	0	0	0	0	0	0	0	0
	241	0	0	0	0	0	0	0	0	0	0	0	0	0	0	0	0	0	0	0	0									241	0	0	0	0	0	0	0	0	0	0	0	0	0	0	0	0	0	0	0
	242	0	0	0	0	0	0	0	0	0	0	0	0	0	0	0	0	0	0	0	0									242	0	0	0	0	0	0	0	0	0	0	0	0	0	0	0	0	0	0	0
	243	0	0	0	0	0	0	0	0	0	0	0	0	0	0	0	0	0	0	0	0									243	0	0	0	0	0	0	0	0	0	0	0	0	0	0	0	0	0	0	0
	244	0	0	0	0	0	0	0	0	0	0	0	0	0	0	0	0	0	0	0	0									244	0	0	0	0	0	0	0	0	0	0	0	0	0	0	0	0	0	0	0
	245	0	0	0	0	0	0	0	0	0	0	0	0	0	0	0	0	0	0	0	0									245	0	0	0	0	0	0	0	0	0	0	0	0	0	0	0	0	0	0	0
	246	0	0	0	0	0	0	0	0	0	0	0	0	0	0	0	0	0	0	0	0									246	0	0	0	0	0	0	0	0	0	0	0	0	0	0	0	0	0	0	0
	247	0	0	0	0	0	0	0	0	0	0	0	0	0	0	0	0	0	0	0	0									247	0	0	0	0	0	0	0	0	0	0	0	0	0	0	0	0	0	0	0
	248	0	0	0	0	0	0	0	0	0	0	0	0	0	0	0	0	0	0	0	0									248	0	0	0	0	0	0	0	0	0	0	0	0	0	0	0	0	0	0	0
	249	0	0	0	0	0	0	0	0	0	0	0	0	0	0	0	0	0	0	0	0									249	0	0	0	0	0	0	0	0	0	0	0	0	0	0	0	0	0	0	0
	250	0	0	0	0	0	0	0	0	0	0	0	0	0	0	0	0	0	0	0	0									250	0	0	0	0	0	0	0	0	0	0	0	0	0	0	0	0	0	0	0
	251	0	0	0	0	0	0	0	0	0	0	0	0	0	0	0	0	0	0	0	0									251	0	0	0	0	0	0	0	0	0	0	0	0	0	0	0	0	0	0	0
	252	0	0	0	0	0	0	0	0	0	0	0	0	0	0	0	0	0	0	0	0									252	0	0	0	0	0	0	0	0	0	0	0	0	0	0	0	0	0	0	0
	253	0	0	0	0	0	0	0	0	0	0	0	0	0	0	0	0	0	0	0	0									253	0	0	0	0	0	0	0	0	0	0	0	0	0	0	0	0	0	0	0
	254	0	0	0	0	0	0	0	0	0	0	0	0	0	0	0	0	0	0	0	0									254	0	0	0	0	0	0	0	0	0	0	0	0	0	0	0	0	0	0	0
	255	0	0	0	0	0	0	0	0	0	0	0	0	0	0	0	0	0	0	0	0									255	0	0	0	0	0	0	0	0	0	0	0	0	0	0	0	0	0	0	0
	256	0	0	0	0	0	0	0	0	0	0	0	0	0	0	0	0	0	0	0	0									256	0	0	0	0	0	0	0	0	0	0	0	0	0	0	0	0	0	0	0
	257	0	0	0	0	0	0	0	0	0	0	0	0	0	0	0	0	0	0	0	0									257	0	0	0	0	0	0	0	0	0	0	0	0	0	0	0	0	0	0	0
	258	0	0	0	0	0	0	0	0	0	0	0	0	0	0	0	0	0	0	0	0									258	0	0	0	0	0	0	0	0	0	0	0	0	0	0	0	0	0	0	0
	259	0	0	0	0	0	0	0	0	0	0	0	0	0	0	0	0	0	0	0	0									259	0	0	0	0	0	0	0	0	0	0	0	0	0	0	0	0	0	0	0
	260	0	0	0	0	0	0	0	0	0	0	0	0	0	0	0	0	0	0	0	0									260	0	0	0	0	0	0	0	0	0	0	0	0	0	0	0	0	0	0	0
	261	0	0	0	0	0	0	0	0	0	0	0	0	0	0	0	0	0	0	0	0									261	0	0	0	0	0	0	0	0	0	0	0	0	0	0	0	0	0	0	0
	262	0	0	0	0	0	0	0	0	0	0	0	0	0	0	0	0	0	0	0	0									262	0	0	0	0	0	0	0	0	0	0	0	0	0	0	0	0	0	0	0
	263	0	0	0	0	0	0	0	0	0	0	0	0	0	0	0	0	0	0	0	0									263	0	0	0	0	0	0	0	0	0	0	0	0	0	0	0	0	0	0	0
	264	0	0	0	0	0	0	0	0	0	0	0	0	0	0	0	0	0	0	0	0									264	0	0	0	0	0	0	0	0	0	0	0	0	0	0	0	0	0	0	0
	265	0	0	0	0	0	0	0	0	0	0	0	0	0	0	0	0	0	0	0	0									265	0	0	0	0	0	0	0	0	0	0	0	0	0	0	0	0	0	0	0
	266	0	0	0	0	0	0	0	0	0	0	0	0	0	0	0	0	0	0	0	0									266	0	0	0	0	0	0	0	0	0	0	0	0	0	0	0	0	0	0	0
	267	0	0	0	0	0	0	0	0	0	0	0	0	0	0	0	0	0	0	0	0									267	0	0	0	0	0	0	0	0	0	0	0	0	0	0	0	0	0	0	0
	268	0	0	0	0	0	0	0	0	0	0	0	0	0	0	0	0	0	0	0	0									268	0	0	0	0	0	0	0	0	0	0	0	0	0	0	0	0	0	0	0
	269	0	0	0	0	0	0	0	0	0	0	0	0	0	0	0	0	0	0	0	0									269	0	0	0	0	0	0	0	0	0	0	0	0	0	0	0	0	0	0	0
	270	0	0	0	0	0	0	0	0	0	0	0	0	0	0	0	0	0	0	0	0									270	0	0	0	0	0	0	0	0	0	0	0	0	0	0	0	0	0	0	0
	271	0	0	0	0	0	0	0	0	0	0	0	0	0	0	0	0	0	0	0	0									271	0	0	0	0	0	0	0	0	0	0	0	0	0	0	0	0	0	0	0
	272	0	0	0	0	0	0	0	0	0	0	0	0	0	0	0	0	0	0	0	0									272	0	0	0	0	0	0	0	0	0	0	0	0	0	0	0	0	0	0	0
	273	0	0	0	0	0	0	0	0	0	0	0	0	0	0	0	0	0	0	0	0									273	0	0	0	0	0	0	0	0	0	0	0	0	0	0	0	0	0	0	0
	274	0	0	0	0	0	0	0	0	0	0	0	0	0	0	0	0	0	0	0	0									274	0	0	0	0	0	0	0	0	0	0	0	0	0	0	0	0	0	0	0
	275	0	0	0	0	0	0	0	0	0	0	0	0	0	0	0	0	0	0	0	0									275	0	0	0	0	0	0	0	0	0	0	0	0	0	0	0	0	0	0	0
	276	0	0	0	0	0	0	0	0	0	0	0	0	0	0	0	0	0	0	0	0									276	0	0	0	0	0	0	0	0	0	0	0	0	0	0	0	0	0	0	0
	277	0	0	0	0	0	0	0	0	0	0	0	0	0	0	0	0	0	0	0	0									277	0	0	0	0	0	0	0	0	0	0	0	0	0	0	0	0	0	0	0
	278	0	0	0	0	0	0	0	0	0	0	0	0	0	0	0	0	0	0	0	0									278	0	0	0	0	0	0	0	0	0	0	0	0	0	0	0	0	0	0	0
	279	0	0	0	0	0	0	0	0	0	0	0	0	0	0	0	0	0	0	0	0									279	0	0	0	0	0	0	0	0	0	0	0	0	0	0	0	0	0	0	0
	280	0	0	0	0	0	0	0	0	0	0	0	0	0	0	0	0	0	0	0	0									280	0	0	0	0	0	0	0	0	0	0	0	0	0	0	0	0	0	0	0
	281	0	0	0	0	0	0	0	0	0	0	0	0	0	0	0	0	0	0	0	0									281	0	0	0	0	0	0	0	0	0	0	0	0	0	0	0	0	0	0	0
	282	0	0	0	0	0	0	0	0	0	0	0	0	0	0	0	0	0	0	0	0									282	0	0	0	0	0	0	0	0	0	0	0	0	0	0	0	0	0	0	0
	283	0	0	0	0	0	0	0	0	0	0	0	0	0	0	0	0	0	0	0	0									283	0	0	0	0	0	0	0	0	0	0	0	0	0	0	0	0	0	0	0
	284	0	0	0	0	0	0	0	0	0	0	0	0	0	0	0	0	0	0	0	0									284	0	0	0	0	0	0	0	0	0	0	0	0	0	0	0	0	0	0	0
	285	0	0	0	0	0	0	0	0	0	0	0	0	0	0	0	0	0	0	0	0									285	0	0	0	0	0	0	0	0	0	0	0	0	0	0	0	0	0	0	0
	286	0	0	0	0	0	0	0	0	0	0	0	0	0	0	0	0	0	0	0	0									286	0	0	0	0	0	0	0	0	0	0	0	0	0	0	0	0	0	0	0
	287	0	0	0	0	0	0	0	0	0	0	0	0	0	0	0	0	0	0	0	0									287	0	0	0	0	0	0	0	0	0	0	0	0	0	0	0	0	0	0	0
	288	0	0	0	0	0	0	0	0	0	0	0	0	0	0	0	0	0	0	0	0									288	0	0	0	0	0	0	0	0	0	0	0	0	0	0	0	0	0	0	0
	289	0	0	0	0	0	0	0	0	0	0	0	0	0	0	0	0	0	0	0	0									289	0	0	0	0	0	0	0	0	0	0	0	0	0	0	0	0	0	0	0
	290	0	0	0	0	0	0	0	0	0	0	0	0	0	0	0	0	0	0	0	0									290	0	0	0	0	0	0	0	0	0	0	0	0	0	0	0	0	0	0	0
	291	0	0	0	0	0	0	0	0	0	0	0	0	0	0	0	0	0	0	0	0									291	0	0	0	0	0	0	0	0	0	0	0	0	0	0	0	0	0	0	0
	292	0	0	0	0	0	0	0	0	0	0	0	0	0	0	0	0	0	0	0	0									292	0	0	0	0	0	0	0	0	0	0	0	0	0	0	0	0	0	0	0
	293	0	0	0	0	0	0	0	0	0	0	0	0	0	0	0	0	0	0	0	0									293	0	0	0	0	0	0	0	0	0	0	0	0	0	0	0	0	0	0	0
	294	0	0	0	0	0	0	0	0	0	0	0	0	0	0	0	0	0	0	0	0									294	0	0	0	0	0	0	0	0	0	0	0	0	0	0	0	0	0	0	0
	295	0	0	0	0	0	0	0	0	0	0	0	0	0	0	0	0	0	0	0	0									295	0	0	0	0	0	0	0	0	0	0	0	0	0	0	0	0	0	0	0
	296	0	0	0	0	0	0	0	0	0	0	0	0	0	0	0	0	0	0	0	0									296	0	0	0	0	0	0	0	0	0	0	0	0	0	0	0	0	0	0	0
	297	0	0	0	0	0	0	0	0	0	0	0	0	0	0	0	0	0	0	0	0									297	0	0	0	0	0	0	0	0	0	0	0	0	0	0	0	0	0	0	0
	298	0	0	0	0	0	0	0	0	0	0	0	0	0	0	0	0	0	0	0	0									298	0	0	0	0	0	0	0	0	0	0	0	0	0	0	0	0	0	0	0
	299	0	0	0	0	0	0	0	0	0	0	0	0	0	0	0	0	0	0	0	0									299	0	0	0	0	0	0	0	0	0	0	0	0	0	0	0	0	0	0	0
	300	0	0	0	0	0	0	0	0	0	0	0	0	0	0	0	0	0	0	0	0									300	0	0	0	0	0	0	0	0	0	0	0	0	0	0	0	0	0	0	0
	301	0	0	0	0	0	0	0	0	0	0	0	0	0	0	0	0	0	0	0	0									301	0	0	0	0	0	0	0	0	0	0	0	0	0	0	0	0	0	0	0
	302	0	0	0	0	0	0	0	0	0	0	0	0	0	0	0	0	0	0	0	0									302	0	0	0	0	0	0	0	0	0	0	0	0	0	0	0	0	0	0	0
	303	0	0	0	0	0	0	0	0	0	0	0	0	0	0	0	0	0	0	0	0									303	0	0	0	0	0	0	0	0	0	0	0	0	0	0	0	0	0	0	0
	304	0	0	0	0	0	0	0	0	0	0	0	0	0	0	0	0	0	0	0	0									304	0	0	0	0	0	0	0	0	0	0	0	0	0	0	0	0	0	0	0
	305	0	0	0	0	0	0	0	0	0	0	0	0	0	0	0	0	0	0	0	0									305	0	0	0	0	0	0	0	0	0	0	0	0	0	0	0	0	0	0	0
	306	0	0	0	0	0	0	0	0	0	0	0	0	0	0	0	0	0	0	0	0									306	0	0	0	0	0	0	0	0	0	0	0	0	0	0	0	0	0	0	0
	307	0	0	0	0	0	0	0	0	0	0	0	0	0	0	0	0	0	0	0	0									307	0	0	0	0	0	0	0	0	0	0	0	0	0	0	0	0	0	0	0
	308	0	0	0	0	0	0	0	0	0	0	0	0	0	0	0	0	0	0	0	0									308	0	0	0	0	0	0	0	0	0	0	0	0	0	0	0	0	0	0	0
	309	0	0	0	0	0	0	0	0	0	0	0	0	0	0	0	0	0	0	0	0									309	0	0	0	0	0	0	0	0	0	0	0	0	0	0	0	0	0	0	0
	310	0	0	0	0	0	0	0	0	0	0	0	0	0	0	0	0	0	0	0	0									310	0	0	0	0	0	0	0	0	0	0	0	0	0	0	0	0	0	0	0
	311	0	0	0	0	0	0	0	0	0	0	0	0	0	0	0	0	0	0	0	0									311	0	0	0	0	0	0	0	0	0	0	0	0	0	0	0	0	0	0	0
	312	0	0	0	0	0	0	0	0	0	0	0	0	0	0	0	0	0	0	0	0									312	0	0	0	0	0	0	0	0	0	0	0	0	0	0	0	0	0	0	0
	313	0	0	0	0	0	0	0	0	0	0	0	0	0	0	0	0	0	0	0	0									313	0	0	0	0	0	0	0	0	0	0	0	0	0	0	0	0	0	0	0
	314	0	0	0	0	0	0	0	0	0	0	0	0	0	0	0	0	0	0	0	0									314	0	0	0	0	0	0	0	0	0	0	0	0	0	0	0	0	0	0	0
	315	0	0	0	0	0	0	0	0	0	0	0	0	0	0	0	0	0	0	0	0									315	0	0	0	0	0	0	0	0	0	0	0	0	0	0	0	0	0	0	0
	316	0	0	0	0	0	0	0	0	0	0	0	0	0	0	0	0	0	0	0	0									316	0	0	0	0	0	0	0	0	0	0	0	0	0	0	0	0	0	0	0
	317	0	0	0	0	0	0	0	0	0	0	0	0	0	0	0	0	0	0	0	0									317	0	0	0	0	0	0	0	0	0	0	0	0	0	0	0	0	0	0	0
	318	0	0	0	0	0	0	0	0	0	0	0	0	0	0	0	0	0	0	0	0									318	0	0	0	0	0	0	0	0	0	0	0	0	0	0	0	0	0	0	0
	319	0	0	0	0	0	0	0	0	0	0	0	0	0	0	0	0	0	0	0	0									319	0	0	0	0	0	0	0	0	0	0	0	0	0	0	0	0	0	0	0
	320	0	0	0	0	0	0	0	0	0	0	0	0	0	0	0	0	0	0	0	0									320	0	0	0	0	0	0	0	0	0	0	0	0	0	0	0	0	0	0	0
	321	0	0	0	0	0	0	0	0	0	0	0	0	0	0	0	0	0	0	0	0									321	0	0	0	0	0	0	0	0	0	0	0	0	0	0	0	0	0	0	0
	322	0	0	0	0	0	0	0	0	0	0	0	0	0	0	0	0	0	0	0	0									322	0	0	0	0	0	0	0	0	0	0	0	0	0	0	0	0	0	0	0
	323	0	0	0	0	0	0	0	0	0	0	0	0	0	0	0	0	0	0	0	0									323	0	0	0	0	0	0	0	0	0	0	0	0	0	0	0	0	0	0	0
	324	0	0	0	0	0	0	0	0	0	0	0	0	0	0	0	0	0	0	0	0									324	0	0	0	0	0	0	0	0	0	0	0	0	0	0	0	0	0	0	0
	325	0	0	0	0	0	0	0	0	0	0	0	0	0	0	0	0	0	0	0	0									325	0	0	0	0	0	0	0	0	0	0	0	0	0	0	0	0	0	0	0
	326	0	0	0	0	0	0	0	0	0	0	0	0	0	0	0	0	0	0	0	0									326	0	0	0	0	0	0	0	0	0	0	0	0	0	0	0	0	0	0	0
	327	0	0	0	0	0	0	0	0	0	0	0	0	0	0	0	0	0	0	0	0									327	0	0	0	0	0	0	0	0	0	0	0	0	0	0	0	0	0	0	0
	328	0	0	0	0	0	0	0	0	0	0	0	0	0	0	0	0	0	0	0	0									328	0	0	0	0	0	0	0	0	0	0	0	0	0	0	0	0	0	0	0
	329	0	0	0	0	0	0	0	0	0	0	0	0	0	0	0	0	0	0	0	0									329	0	0	0	0	0	0	0	0	0	0	0	0	0	0	0	0	0	0	0
	330	0	0	0	0	0	0	0	0	0	0	0	0	0	0	0	0	0	0	0	0									330	0	0	0	0	0	0	0	0	0	0	0	0	0	0	0	0	0	0	0
	331	0	0	0	0	0	0	0	0	0	0	0	0	0	0	0	0	0	0	0	0									331	0	0	0	0	0	0	0	0	0	0	0	0	0	0	0	0	0	0	0
	332	0	0	0	0	0	0	0	0	0	0	0	0	0	0	0	0	0	0	0	0									332	0	0	0	0	0	0	0	0	0	0	0	0	0	0	0	0	0	0	0
	333	0	0	0	0	0	0	0	0	0	0	0	0	0	0	0	0	0	0	0	0									333	0	0	0	0	0	0	0	0	0	0	0	0	0	0	0	0	0	0	0
	334	0	0	0	0	0	0	0	0	0	0	0	0	0	0	0	0	0	0	0	0									334	0	0	0	0	0	0	0	0	0	0	0	0	0	0	0	0	0	0	0
	335	0	0	0	0	0	0	0	0	0	0	0	0	0	0	0	0	0	0	0	0									335	0	0	0	0	0	0	0	0	0	0	0	0	0	0	0	0	0	0	0
	336	0	0	0	0	0	0	0	0	0	0	0	0	0	0	0	0	0	0	0	0									336	0	0	0	0	0	0	0	0	0	0	0	0	0	0	0	0	0	0	0
	337	0	0	0	0	0	0	0	0	0	0	0	0	0	0	0	0	0	0	0	0									337	0	0	0	0	0	0	0	0	0	0	0	0	0	0	0	0	0	0	0
	338	0	0	0	0	0	0	0	0	0	0	0	0	0	0	0	0	0	0	0	0									338	0	0	0	0	0	0	0	0	0	0	0	0	0	0	0	0	0	0	0
	339	0	0	0	0	0	0	0	0	0	0	0	0	0	0	0	0	0	0	0	0									339	0	0	0	0	0	0	0	0	0	0	0	0	0	0	0	0	0	0	0
	340	0	0	0	0	0	0	0	0	0	0	0	0	0	0	0	0	0	0	0	0									340	0	0	0	0	0	0	0	0	0	0	0	0	0	0	0	0	0	0	0
	341	0	0	0	0	0	0	0	0	0	0	0	0	0	0	0	0	0	0	0	0									341	0	0	0	0	0	0	0	0	0	0	0	0	0	0	0	0	0	0	0
	342	0	0	0	0	0	0	0	0	0	0	0	0	0	0	0	0	0	0	0	0									342	0	0	0	0	0	0	0	0	0	0	0	0	0	0	0	0	0	0	0
	343	0	0	0	0	0	0	0	0	0	0	0	0	0	0	0	0	0	0	0	0									343	0	0	0	0	0	0	0	0	0	0	0	0	0	0	0	0	0	0	0
	344	0	0	0	0	0	0	0	0	0	0	0	0	0	0	0	0	0	0	0	0									344	0	0	0	0	0	0	0	0	0	0	0	0	0	0	0	0	0	0	0
	345	0	0	0	0	0	0	0	0	0	0	0	0	0	0	0	0	0	0	0	0									345	0	0	0	0	0	0	0	0	0	0	0	0	0	0	0	0	0	0	0
	346	0	0	0	0	0	0	0	0	0	0	0	0	0	0	0	0	0	0	0	0									346	0	0	0	0	0	0	0	0	0	0	0	0	0	0	0	0	0	0	0
	347	0	0	0	0	0	0	0	0	0	0	0	0	0	0	0	0	0	0	0	0									347	0	0	0	0	0	0	0	0	0	0	0	0	0	0	0	0	0	0	0
	348	0	0	0	0	0	0	0	0	0	0	0	0	0	0	0	0	0	0	0	0									348	0	0	0	0	0	0	0	0	0	0	0	0	0	0	0	0	0	0	0
	349	0	0	0	0	0	0	0	0	0	0	0	0	0	0	0	0	0	0	0	0									349	0	0	0	0	0	0	0	0	0	0	0	0	0	0	0	0	0	0	0
	350	0	0	0	0	0	0	0	0	0	0	0	0	0	0	0	0	0	0	0	0									350	0	0	0	0	0	0	0	0	0	0	0	0	0	0	0	0	0	0	0
	351	0	0	0	0	0	0	0	0	0	0	0	0	0	0	0	0	0	0	0	0									351	0	0	0	0	0	0	0	0	0	0	0	0	0	0	0	0	0	0	0
	352	0	0	0	0	0	0	0	0	0	0	0	0	0	0	0	0	0	0	0	0									352	0	0	0	0	0	0	0	0	0	0	0	0	0	0	0	0	0	0	0
	353	0	0	0	0	0	0	0	0	0	0	0	0	0	0	0	0	0	0	0	0									353	0	0	0	0	0	0	0	0	0	0	0	0	0	0	0	0	0	0	0
	354	0	0	0	0	0	0	0	0	0	0	0	0	0	0	0	0	0	0	0	0									354	0	0	0	0	0	0	0	0	0	0	0	0	0	0	0	0	0	0	0
	355	0	0	0	0	0	0	0	0	0	0	0	0	0	0	0	0	0	0	0	0									355	0	0	0	0	0	0	0	0	0	0	0	0	0	0	0	0	0	0	0
	356	0	0	0	0	0	0	0	0	0	0	0	0	0	0	0	0	0	0	0	0									356	0	0	0	0	0	0	0	0	0	0	0	0	0	0	0	0	0	0	0
	357	0	0	0	0	0	0	0	0	0	0	0	0	0	0	0	0	0	0	0	0									357	0	0	0	0	0	0	0	0	0	0	0	0	0	0	0	0	0	0	0
	358	0	0	0	0	0	0	0	0	0	0	0	0	0	0	0	0	0	0	0	0									358	0	0	0	0	0	0	0	0	0	0	0	0	0	0	0	0	0	0	0
	359	0	0	0	0	0	0	0	0	0	0	0	0	0	0	0	0	0	0	0	0									359	0	0	0	0	0	0	0	0	0	0	0	0	0	0	0	0	0	0	0
	360	0	0	0	0	0	0	0	0	0	0	0	0	0	0	0	0	0	0	0	0									360	0	0	0	0	0	0	0	0	0	0	0	0	0	0	0	0	0	0	0
	361	0	0	0	0	0	0	0	0	0	0	0	0	0	0	0	0	0	0	0	0									361	0	0	0	0	0	0	0	0	0	0	0	0	0	0	0	0	0	0	0
	362	0	0	0	0	0	0	0	0	0	0	0	0	0	0	0	0	0	0	0	0									362	0	0	0	0	0	0	0	0	0	0	0	0	0	0	0	0	0	0	0
	363	0	0	0	0	0	0	0	0	0	0	0	0	0	0	0	0	0	0	0	0									363	0	0	0	0	0	0	0	0	0	0	0	0	0	0	0	0	0	0	0
	364	0	0	0	0	0	0	0	0	0	0	0	0	0	0	0	0	0	0	0	0									364	0	0	0	0	0	0	0	0	0	0	0	0	0	0	0	0	0	0	0
	365	0	0	0	0	0	0	0	0	0	0	0	0	0	0	0	0	0	0	0	0									365	0	0	0	0	0	0	0	0	0	0	0	0	0	0	0	0	0	0	0
	366	0	0	0	0	0	0	0	0	0	0	0	0	0	0	0	0	0	0	0	0									366	0	0	0	0	0	0	0	0	0	0	0	0	0	0	0	0	0	0	0
	367	0	0	0	0	0	0	0	0	0	0	0	0	0	0	0	0	0	0	0	0									367	0	0	0	0	0	0	0	0	0	0	0	0	0	0	0	0	0	0	0
	368	0	0	0	0	0	0	0	0	0	0	0	0	0	0	0	0	0	0	0	0									368	0	0	0	0	0	0	0	0	0	0	0	0	0	0	0	0	0	0	0
	369	0	0	0	0	0	0	0	0	0	0	0	0	0	0	0	0	0	0	0	0									369	0	0	0	0	0	0	0	0	0	0	0	0	0	0	0	0	0	0	0
	370	0	0	0	0	0	0	0	0	0	0	0	0	0	0	0	0	0	0	0	0									370	0	0	0	0	0	0	0	0	0	0	0	0	0	0	0	0	0	0	0
	371	0	0	0	0	0	0	0	0	0	0	0	0	0	0	0	0	0	0	0	0									371	0	0	0	0	0	0	0	0	0	0	0	0	0	0	0	0	0	0	0
	372	0	0	0	0	0	0	0	0	0	0	0	0	0	0	0	0	0	0	0	0									372	0	0	0	0	0	0	0	0	0	0	0	0	0	0	0	0	0	0	0
	373	0	0	0	0	0	0	0	0	0	0	0	0	0	0	0	0	0	0	0	0									373	0	0	0	0	0	0	0	0	0	0	0	0	0	0	0	0	0	0	0
	374	0	0	0	0	0	0	0	0	0	0	0	0	0	0	0	0	0	0	0	0									374	0	0	0	0	0	0	0	0	0	0	0	0	0	0	0	0	0	0	0
	375	0	0	0	0	0	0	0	0	0	0	0	0	0	0	0	0	0	0	0	0									375	0	0	0	0	0	0	0	0	0	0	0	0	0	0	0	0	0	0	0
	376	0	0	0	0	0	0	0	0	0	0	0	0	0	0	0	0	0	0	0	0									376	0	0	0	0	0	0	0	0	0	0	0	0	0	0	0	0	0	0	0
	377	0	0	0	0	0	0	0	0	0	0	0	0	0	0	0	0	0	0	0	0									377	0	0	0	0	0	0	0	0	0	0	0	0	0	0	0	0	0	0	0
	378	0	0	0	0	0	0	0	0	0	0	0	0	0	0	0	0	0	0	0	0									378	0	0	0	0	0	0	0	0	0	0	0	0	0	0	0	0	0	0	0
	379	0	0	0	0	0	0	0	0	0	0	0	0	0	0	0	0	0	0	0	0									379	0	0	0	0	0	0	0	0	0	0	0	0	0	0	0	0	0	0	0
	380	0	0	0	0	0	0	0	0	0	0	0	0	0	0	0	0	0	0	0	0									380	0	0	0	0	0	0	0	0	0	0	0	0	0	0	0	0	0	0	0
	381	0	0	0	0	0	0	0	0	0	0	0	0	0	0	0	0	0	0	0	0									381	0	0	0	0	0	0	0	0	0	0	0	0	0	0	0	0	0	0	0
	382	0	0	0	0	0	0	0	0	0	0	0	0	0	0	0	0	0	0	0	0									382	0	0	0	0	0	0	0	0	0	0	0	0	0	0	0	0	0	0	0
	383	0	0	0	0	0	0	0	0	0	0	0	0	0	0	0	0	0	0	0	0									383	0	0	0	0	0	0	0	0	0	0	0	0	0	0	0	0	0	0	0
	384	0	0	0	0	0	0	0	0	0	0	0	0	0	0	0	0	0	0	0	0									384	0	0	0	0	0	0	0	0	0	0	0	0	0	0	0	0	0	0	0
	385	0	0	0	0	0	0	0	0	0	0	0	0	0	0	0	0	0	0	0	0									385	0	0	0	0	0	0	0	0	0	0	0	0	0	0	0	0	0	0	0
	386	0	0	0	0	0	0	0	0	0	0	0	0	0	0	0	0	0	0	0	0									386	0	0	0	0	0	0	0	0	0	0	0	0	0	0	0	0	0	0	0
	387	0	0	0	0	0	0	0	0	0	0	0	0	0	0	0	0	0	0	0	0									387	0	0	0	0	0	0	0	0	0	0	0	0	0	0	0	0	0	0	0
	388	0	0	0	0	0	0	0	0	0	0	0	0	0	0	0	0	0	0	0	0									388	0	0	0	0	0	0	0	0	0	0	0	0	0	0	0	0	0	0	0
	389	0	0	0	0	0	0	0	0	0	0	0	0	0	0	0	0	0	0	0	0									389	0	0	0	0	0	0	0	0	0	0	0	0	0	0	0	0	0	0	0
	390	0	0	0	0	0	0	0	0	0	0	0	0	0	0	0	0	0	0	0	0									390	0	0	0	0	0	0	0	0	0	0	0	0	0	0	0	0	0	0	0
	391	0	0	0	0	0	0	0	0	0	0	0	0	0	0	0	0	0	0	0	0									391	0	0	0	0	0	0	0	0	0	0	0	0	0	0	0	0	0	0	0
	392	0	0	0	0	0	0	0	0	0	0	0	0	0	0	0	0	0	0	0	0									392	0	0	0	0	0	0	0	0	0	0	0	0	0	0	0	0	0	0	0
	393	0	0	0	0	0	0	0	0	0	0	0	0	0	0	0	0	0	0	0	0									393	0	0	0	0	0	0	0	0	0	0	0	0	0	0	0	0	0	0	0
	394	0	0	0	0	0	0	0	0	0	0	0	0	0	0	0	0	0	0	0	0									394	0	0	0	0	0	0	0	0	0	0	0	0	0	0	0	0	0	0	0
	395	0	0	0	0	0	0	0	0	0	0	0	0	0	0	0	0	0	0	0	0									395	0	0	0	0	0	0	0	0	0	0	0	0	0	0	0	0	0	0	0
	396	0	0	0	0	0	0	0	0	0	0	0	0	0	0	0	0	0	0	0	0									396	0	0	0	0	0	0	0	0	0	0	0	0	0	0	0	0	0	0	0
	397	0	0	0	0	0	0	0	0	0	0	0	0	0	0	0	0	0	0	0	0									397	0	0	0	0	0	0	0	0	0	0	0	0	0	0	0	0	0	0	0
	398	0	0	0	0	0	0	0	0	0	0	0	0	0	0	0	0	0	0	0	0									398	0	0	0	0	0	0	0	0	0	0	0	0	0	0	0	0	0	0	0
	399	0	0	0	0	0	0	0	0	0	0	0	0	0	0	0	0	0	0	0	0									399	0	0	0	0	0	0	0	0	0	0	0	0	0	0	0	0	0	0	0
	400	0	0	0	0	0	0	0	0	0	0	0	0	0	0	0	0	0	0	0	0									400	0	0	0	0	0	0	0	0	0	0	0	0	0	0	0	0	0	0	0
	401	0	0	0	0	0	0	0	0	0	0	0	0	0	0	0	0	0	0	0	0									401	0	0	0	0	0	0	0	0	0	0	0	0	0	0	0	0	0	0	0
	402	0	0	0	0	0	0	0	0	0	0	0	0	0	0	0	0	0	0	0	0									402	0	0	0	0	0	0	0	0	0	0	0	0	0	0	0	0	0	0	0
	403	0	0	0	0	0	0	0	0	0	0	0	0	0	0	0	0	0	0	0	0									403	0	0	0	0	0	0	0	0	0	0	0	0	0	0	0	0	0	0	0
	404	0	0	0	0	0	0	0	0	0	0	0	0	0	0	0	0	0	0	0	0									404	0	0	0	0	0	0	0	0	0	0	0	0	0	0	0	0	0	0	0
	405	0	0	0	0	0	0	0	0	0	0	0	0	0	0	0	0	0	0	0	0									405	0	0	0	0	0	0	0	0	0	0	0	0	0	0	0	0	0	0	0
	406	0	0	0	0	0	0	0	0	0	0	0	0	0	0	0	0	0	0	0	0									406	0	0	0	0	0	0	0	0	0	0	0	0	0	0	0	0	0	0	0
	407	0	0	0	0	0	0	0	0	0	0	0	0	0	0	0	0	0	0	0	0									407	0	0	0	0	0	0	0	0	0	0	0	0	0	0	0	0	0	0	0
	408	0	0	0	0	0	0	0	0	0	0	0	0	0	0	0	0	0	0	0	0									408	0	0	0	0	0	0	0	0	0	0	0	0	0	0	0	0	0	0	0
	409	0	0	0	0	0	0	0	0	0	0	0	0	0	0	0	0	0	0	0	0									409	0	0	0	0	0	0	0	0	0	0	0	0	0	0	0	0	0	0	0
	410	0	0	0	0	0	0	0	0	0	0	0	0	0	0	0	0	0	0	0	0									410	0	0	0	0	0	0	0	0	0	0	0	0	0	0	0	0	0	0	0
	411	0	0	0	0	0	0	0	0	0	0	0	0	0	0	0	0	0	0	0	0									411	0	0	0	0	0	0	0	0	0	0	0	0	0	0	0	0	0	0	0
	412	0	0	0	0	0	0	0	0	0	0	0	0	0	0	0	0	0	0	0	0									412	0	0	0	0	0	0	0	0	0	0	0	0	0	0	0	0	0	0	0
	413	0	0	0	0	0	0	0	0	0	0	0	0	0	0	0	0	0	0	0	0									413	0	0	0	0	0	0	0	0	0	0	0	0	0	0	0	0	0	0	0
	414	0	0	0	0	0	0	0	0	0	0	0	0	0	0	0	0	0	0	0	0									414	0	0	0	0	0	0	0	0	0	0	0	0	0	0	0	0	0	0	0
	415	0	0	0	0	0	0	0	0	0	0	0	0	0	0	0	0	0	0	0	0									415	0	0	0	0	0	0	0	0	0	0	0	0	0	0	0	0	0	0	0
	416	0	0	0	0	0	0	0	0	0	0	0	0	0	0	0	0	0	0	0	0									416	0	0	0	0	0	0	0	0	0	0	0	0	0	0	0	0	0	0	0
	417	0	0	0	0	0	0	0	0	0	0	0	0	0	0	0	0	0	0	0	0									417	0	0	0	0	0	0	0	0	0	0	0	0	0	0	0	0	0	0	0
	418	0	0	0	0	0	0	0	0	0	0	0	0	0	0	0	0	0	0	0	0									418	0	0	0	0	0	0	0	0	0	0	0	0	0	0	0	0	0	0	0
	419	0	0	0	0	0	0	0	0	0	0	0	0	0	0	0	0	0	0	0	0									419	0	0	0	0	0	0	0	0	0	0	0	0	0	0	0	0	0	0	0
	420	0	0	0	0	0	0	0	0	0	0	0	0	0	0	0	0	0	0	0	0									420	0	0	0	0	0	0	0	0	0	0	0	0	0	0	0	0	0	0	0
	421	0	0	0	0	0	0	0	0	0	0	0	0	0	0	0	0	0	0	0	0									421	0	0	0	0	0	0	0	0	0	0	0	0	0	0	0	0	0	0	0
	422	0	0	0	0	0	0	0	0	0	0	0	0	0	0	0	0	0	0	0	0									422	0	0	0	0	0	0	0	0	0	0	0	0	0	0	0	0	0	0	0
	423	0	0	0	0	0	0	0	0	0	0	0	0	0	0	0	0	0	0	0	0									423	0	0	0	0	0	0	0	0	0	0	0	0	0	0	0	0	0	0	0
	424	0	0	0	0	0	0	0	0	0	0	0	0	0	0	0	0	0	0	0	0									424	0	0	0	0	0	0	0	0	0	0	0	0	0	0	0	0	0	0	0
	425	0	0	0	0	0	0	0	0	0	0	0	0	0	0	0	0	0	0	0	0									425	0	0	0	0	0	0	0	0	0	0	0	0	0	0	0	0	0	0	0
	426	0	0	0	0	0	0	0	0	0	0	0	0	0	0	0	0	0	0	0	0									426	0	0	0	0	0	0	0	0	0	0	0	0	0	0	0	0	0	0	0
	427	0	0	0	0	0	0	0	0	0	0	0	0	0	0	0	0	0	0	0	0									427	0	0	0	0	0	0	0	0	0	0	0	0	0	0	0	0	0	0	0
	428	0	0	0	0	0	0	0	0	0	0	0	0	0	0	0	0	0	0	0	0									428	0	0	0	0	0	0	0	0	0	0	0	0	0	0	0	0	0	0	0
	429	0	0	0	0	0	0	0	0	0	0	0	0	0	0	0	0	0	0	0	0									429	0	0	0	0	0	0	0	0	0	0	0	0	0	0	0	0	0	0	0
	430	0	0	0	0	0	0	0	0	0	0	0	0	0	0	0	0	0	0	0	0									430	0	0	0	0	0	0	0	0	0	0	0	0	0	0	0	0	0	0	0
	431	0	0	0	0	0	0	0	0	0	0	0	0	0	0	0	0	0	0	0	0									431	0	0	0	0	0	0	0	0	0	0	0	0	0	0	0	0	0	0	0
	432	0	0	0	0	0	0	0	0	0	0	0	0	0	0	0	0	0	0	0	0									432	0	0	0	0	0	0	0	0	0	0	0	0	0	0	0	0	0	0	0
	433	0	0	0	0	0	0	0	0	0	0	0	0	0	0	0	0	0	0	0	0									433	0	0	0	0	0	0	0	0	0	0	0	0	0	0	0	0	0	0	0
	434	0	0	0	0	0	0	0	0	0	0	0	0	0	0	0	0	0	0	0	0									434	0	0	0	0	0	0	0	0	0	0	0	0	0	0	0	0	0	0	0
	435	0	0	0	0	0	0	0	0	0	0	0	0	0	0	0	0	0	0	0	0									435	0	0	0	0	0	0	0	0	0	0	0	0	0	0	0	0	0	0	0
	436	0	0	0	0	0	0	0	0	0	0	0	0	0	0	0	0	0	0	0	0									436	0	0	0	0	0	0	0	0	0	0	0	0	0	0	0	0	0	0	0
	437	0	0	0	0	0	0	0	0	0	0	0	0	0	0	0	0	0	0	0	0									437	0	0	0	0	0	0	0	0	0	0	0	0	0	0	0	0	0	0	0
	438	0	0	0	0	0	0	0	0	0	0	0	0	0	0	0	0	0	0	0	0									438	0	0	0	0	0	0	0	0	0	0	0	0	0	0	0	0	0	0	0
	439	0	0	0	0	0	0	0	0	0	0	0	0	0	0	0	0	0	0	0	0									439	0	0	0	0	0	0	0	0	0	0	0	0	0	0	0	0	0	0	0
	440	0	0	0	0	0	0	0	0	0	0	0	0	0	0	0	0	0	0	0	0									440	0	0	0	0	0	0	0	0	0	0	0	0	0	0	0	0	0	0	0
	441	0	0	0	0	0	0	0	0	0	0	0	0	0	0	0	0	0	0	0	0									441	0	0	0	0	0	0	0	0	0	0	0	0	0	0	0	0	0	0	0
	442	0	0	0	0	0	0	0	0	0	0	0	0	0	0	0	0	0	0	0	0									442	0	0	0	0	0	0	0	0	0	0	0	0	0	0	0	0	0	0	0
	443	0	0	0	0	0	0	0	0	0	0	0	0	0	0	0	0	0	0	0	0									443	0	0	0	0	0	0	0	0	0	0	0	0	0	0	0	0	0	0	0
	444	0	0	0	0	0	0	0	0	0	0	0	0	0	0	0	0	0	0	0	0									444	0	0	0	0	0	0	0	0	0	0	0	0	0	0	0	0	0	0	0
	445	0	0	0	0	0	0	0	0	0	0	0	0	0	0	0	0	0	0	0	0									445	0	0	0	0	0	0	0	0	0	0	0	0	0	0	0	0	0	0	0
	446	0	0	0	0	0	0	0	0	0	0	0	0	0	0	0	0	0	0	0	0									446	0	0	0	0	0	0	0	0	0	0	0	0	0	0	0	0	0	0	0
	447	0	0	0	0	0	0	0	0	0	0	0	0	0	0	0	0	0	0	0	0									447	0	0	0	0	0	0	0	0	0	0	0	0	0	0	0	0	0	0	0
	448	0	0	0	0	0	0	0	0	0	0	0	0	0	0	0	0	0	0	0	0									448	0	0	0	0	0	0	0	0	0	0	0	0	0	0	0	0	0	0	0
	449	0	0	0	0	0	0	0	0	0	0	0	0	0	0	0	0	0	0	0	0									449	0	0	0	0	0	0	0	0	0	0	0	0	0	0	0	0	0	0	0
	450	0	0	0	0	0	0	0	0	0	0	0	0	0	0	0	0	0	0	0	0									450	0	0	0	0	0	0	0	0	0	0	0	0	0	0	0	0	0	0	0
	451	0	0	0	0	0	0	0	0	0	0	0	0	0	0	0	0	0	0	0	0									451	0	0	0	0	0	0	0	0	0	0	0	0	0	0	0	0	0	0	0
	452	0	0	0	0	0	0	0	0	0	0	0	0	0	0	0	0	0	0	0	0									452	0	0	0	0	0	0	0	0	0	0	0	0	0	0	0	0	0	0	0
	453	0	0	0	0	0	0	0	0	0	0	0	0	0	0	0	0	0	0	0	0									453	0	0	0	0	0	0	0	0	0	0	0	0	0	0	0	0	0	0	0
	454	0	0	0	0	0	0	0	0	0	0	0	0	0	0	0	0	0	0	0	0									454	0	0	0	0	0	0	0	0	0	0	0	0	0	0	0	0	0	0	0
	455	0	0	0	0	0	0	0	0	0	0	0	0	0	0	0	0	0	0	0	0									455	0	0	0	0	0	0	0	0	0	0	0	0	0	0	0	0	0	0	0
	456	0	0	0	0	0	0	0	0	0	0	0	0	0	0	0	0	0	0	0	0									456	0	0	0	0	0	0	0	0	0	0	0	0	0	0	0	0	0	0	0
	457	0	0	0	0	0	0	0	0	0	0	0	0	0	0	0	0	0	0	0	0									457	0	0	0	0	0	0	0	0	0	0	0	0	0	0	0	0	0	0	0
	458	0	0	0	0	0	0	0	0	0	0	0	0	0	0	0	0	0	0	0	0									458	0	0	0	0	0	0	0	0	0	0	0	0	0	0	0	0	0	0	0
	459	0	0	0	0	0	0	0	0	0	0	0	0	0	0	0	0	0	0	0	0									459	0	0	0	0	0	0	0	0	0	0	0	0	0	0	0	0	0	0	0
	460	0	0	0	0	0	0	0	0	0	0	0	0	0	0	0	0	0	0	0	0									460	0	0	0	0	0	0	0	0	0	0	0	0	0	0	0	0	0	0	0
	461	0	0	0	0	0	0	0	0	0	0	0	0	0	0	0	0	0	0	0	0									461	0	0	0	0	0	0	0	0	0	0	0	0	0	0	0	0	0	0	0
	462	0	0	0	0	0	0	0	0	0	0	0	0	0	0	0	0	0	0	0	0									462	0	0	0	0	0	0	0	0	0	0	0	0	0	0	0	0	0	0	0
	463	0	0	0	0	0	0	0	0	0	0	0	0	0	0	0	0	0	0	0	0									463	0	0	0	0	0	0	0	0	0	0	0	0	0	0	0	0	0	0	0
	464	0	0	0	0	0	0	0	0	0	0	0	0	0	0	0	0	0	0	0	0									464	0	0	0	0	0	0	0	0	0	0	0	0	0	0	0	0	0	0	0
	465	0	0	0	0	0	0	0	0	0	0	0	0	0	0	0	0	0	0	0	0									465	0	0	0	0	0	0	0	0	0	0	0	0	0	0	0	0	0	0	0
	466	0	0	0	0	0	0	0	0	0	0	0	0	0	0	0	0	0	0	0	0									466	0	0	0	0	0	0	0	0	0	0	0	0	0	0	0	0	0	0	0
	467	0	0	0	0	0	0	0	0	0	0	0	0	0	0	0	0	0	0	0	0									467	0	0	0	0	0	0	0	0	0	0	0	0	0	0	0	0	0	0	0
	468	0	0	0	0	0	0	0	0	0	0	0	0	0	0	0	0	0	0	0	0									468	0	0	0	0	0	0	0	0	0	0	0	0	0	0	0	0	0	0	0
	469	0	0	0	0	0	0	0	0	0	0	0	0	0	0	0	0	0	0	0	0									469	0	0	0	0	0	0	0	0	0	0	0	0	0	0	0	0	0	0	0
	470	0	0	0	0	0	0	0	0	0	0	0	0	0	0	0	0	0	0	0	0									470	0	0	0	0	0	0	0	0	0	0	0	0	0	0	0	0	0	0	0
	471	0	0	0	0	0	0	0	0	0	0	0	0	0	0	0	0	0	0	0	0									471	0	0	0	0	0	0	0	0	0	0	0	0	0	0	0	0	0	0	0
	472	0	0	0	0	0	0	0	0	0	0	0	0	0	0	0	0	0	0	0	0									472	0	0	0	0	0	0	0	0	0	0	0	0	0	0	0	0	0	0	0
	473	0	0	0	0	0	0	0	0	0	0	0	0	0	0	0	0	0	0	0	0									473	0	0	0	0	0	0	0	0	0	0	0	0	0	0	0	0	0	0	0
	474	0	0	0	0	0	0	0	0	0	0	0	0	0	0	0	0	0	0	0	0									474	0	0	0	0	0	0	0	0	0	0	0	0	0	0	0	0	0	0	0
	475	0	0	0	0	0	0	0	0	0	0	0	0	0	0	0	0	0	0	0	0									475	0	0	0	0	0	0	0	0	0	0	0	0	0	0	0	0	0	0	0
	476	0	0	0	0	0	0	0	0	0	0	0	0	0	0	0	0	0	0	0	0									476	0	0	0	0	0	0	0	0	0	0	0	0	0	0	0	0	0	0	0
	477	0	0	0	0	0	0	0	0	0	0	0	0	0	0	0	0	0	0	0	0									477	0	0	0	0	0	0	0	0	0	0	0	0	0	0	0	0	0	0	0
	478	0	0	0	0	0	0	0	0	0	0	0	0	0	0	0	0	0	0	0	0									478	0	0	0	0	0	0	0	0	0	0	0	0	0	0	0	0	0	0	0
	479	0	0	0	0	0	0	0	0	0	0	0	0	0	0	0	0	0	0	0	0									479	0	0	0	0	0	0	0	0	0	0	0	0	0	0	0	0	0	0	0
	480	0	0	0	0	0	0	0	0	0	0	0	0	0	0	0	0	0	0	0	0									480	0	0	0	0	0	0	0	0	0	0	0	0	0	0	0	0	0	0	0
	481	0	0	0	0	0	0	0	0	0	0	0	0	0	0	0	0	0	0	0	0									481	0	0	0	0	0	0	0	0	0	0	0	0	0	0	0	0	0	0	0
	482	0	0	0	0	0	0	0	0	0	0	0	0	0	0	0	0	0	0	0	0									482	0	0	0	0	0	0	0	0	0	0	0	0	0	0	0	0	0	0	0
	483	0	0	0	0	0	0	0	0	0	0	0	0	0	0	0	0	0	0	0	0									483	0	0	0	0	0	0	0	0	0	0	0	0	0	0	0	0	0	0	0
	484	0	0	0	0	0	0	0	0	0	0	0	0	0	0	0	0	0	0	0	0									484	0	0	0	0	0	0	0	0	0	0	0	0	0	0	0	0	0	0	0
	485	0	0	0	0	0	0	0	0	0	0	0	0	0	0	0	0	0	0	0	0									485	0	0	0	0	0	0	0	0	0	0	0	0	0	0	0	0	0	0	0
	486	0	0	0	0	0	0	0	0	0	0	0	0	0	0	0	0	0	0	0	0									486	0	0	0	0	0	0	0	0	0	0	0	0	0	0	0	0	0	0	0
	487	0	0	0	0	0	0	0	0	0	0	0	0	0	0	0	0	0	0	0	0									487	0	0	0	0	0	0	0	0	0	0	0	0	0	0	0	0	0	0	0
	488	0	0	0	0	0	0	0	0	0	0	0	0	0	0	0	0	0	0	0	0									488	0	0	0	0	0	0	0	0	0	0	0	0	0	0	0	0	0	0	0
	489	0	0	0	0	0	0	0	0	0	0	0	0	0	0	0	0	0	0	0	0									489	0	0	0	0	0	0	0	0	0	0	0	0	0	0	0	0	0	0	0
	490	0	0	0	0	0	0	0	0	0	0	0	0	0	0	0	0	0	0	0	0									490	0	0	0	0	0	0	0	0	0	0	0	0	0	0	0	0	0	0	0
	491	0	0	0	0	0	0	0	0	0	0	0	0	0	0	0	0	0	0	0	0									491	0	0	0	0	0	0	0	0	0	0	0	0	0	0	0	0	0	0	0
	492	0	0	0	0	0	0	0	0	0	0	0	0	0	0	0	0	0	0	0	0									492	0	0	0	0	0	0	0	0	0	0	0	0	0	0	0	0	0	0	0
	493	0	0	0	0	0	0	0	0	0	0	0	0	0	0	0	0	0	0	0	0									493	0	0	0	0	0	0	0	0	0	0	0	0	0	0	0	0	0	0	0
	494	0	0	0	0	0	0	0	0	0	0	0	0	0	0	0	0	0	0	0	0									494	0	0	0	0	0	0	0	0	0	0	0	0	0	0	0	0	0	0	0
	495	0	0	0	0	0	0	0	0	0	0	0	0	0	0	0	0	0	0	0	0									495	0	0	0	0	0	0	0	0	0	0	0	0	0	0	0	0	0	0	0
	496	0	0	0	0	0	0	0	0	0	0	0	0	0	0	0	0	0	0	0	0									496	0	0	0	0	0	0	0	0	0	0	0	0	0	0	0	0	0	0	0
	497	0	0	0	0	0	0	0	0	0	0	0	0	0	0	0	0	0	0	0	0									497	0	0	0	0	0	0	0	0	0	0	0	0	0	0	0	0	0	0	0
	498	0	0	0	0	0	0	0	0	0	0	0	0	0	0	0	0	0	0	0	0									498	0	0	0	0	0	0	0	0	0	0	0	0	0	0	0	0	0	0	0
	499	0	0	0	0	0	0	0	0	0	0	0	0	0	0	0	0	0	0	0	0									499	0	0	0	0	0	0	0	0	0	0	0	0	0	0	0	0	0	0	0
	500	0	0	0	0	0	0	0	0	0	0	0	0	0	0	0	0	0	0	0	0									500	0	0	0	0	0	0	0	0	0	0	0	0	0	0	0	0	0	0	0
	501	0	0	0	0	0	0	0	0	0	0	0	0	0	0	0	0	0	0	0	0									501	0	0	0	0	0	0	0	0	0	0	0	0	0	0	0	0	0	0	0
	502	0	0	0	0	0	0	0	0	0	0	0	0	0	0	0	0	0	0	0	0									502	0	0	0	0	0	0	0	0	0	0	0	0	0	0	0	0	0	0	0
	503	0	0	0	0	0	0	0	0	0	0	0	0	0	0	0	0	0	0	0	0									503	0	0	0	0	0	0	0	0	0	0	0	0	0	0	0	0	0	0	0
	504	0	0	0	0	0	0	0	0	0	0	0	0	0	0	0	0	0	0	0	0									504	0	0	0	0	0	0	0	0	0	0	0	0	0	0	0	0	0	0	0
	505	0	0	0	0	0	0	0	0	0	0	0	0	0	0	0	0	0	0	0	0									505	0	0	0	0	0	0	0	0	0	0	0	0	0	0	0	0	0	0	0
	506	0	0	0	0	0	0	0	0	0	0	0	0	0	0	0	0	0	0	0	0									506	0	0	0	0	0	0	0	0	0	0	0	0	0	0	0	0	0	0	0
	507	0	0	0	0	0	0	0	0	0	0	0	0	0	0	0	0	0	0	0	0									507	0	0	0	0	0	0	0	0	0	0	0	0	0	0	0	0	0	0	0
	508	0	0	0	0	0	0	0	0	0	0	0	0	0	0	0	0	0	0	0	0									508	0	0	0	0	0	0	0	0	0	0	0	0	0	0	0	0	0	0	0
	509	0	0	0	0	0	0	0	0	0	0	0	0	0	0	0	0	0	0	0	0									509	0	0	0	0	0	0	0	0	0	0	0	0	0	0	0	0	0	0	0
	510	0	0	0	0	0	0	0	0	0	0	0	0	0	0	0	0	0	0	0	0									510	0	0	0	0	0	0	0	0	0	0	0	0	0	0	0	0	0	0	0
	511	0	0	0	0	0	0	0	0	0	0	0	0	0	0	0	0	0	0	0	0									511	0	0	0	0	0	0	0	0	0	0	0	0	0	0	0	0	0	0	0
	512	0	0	0	0	0	0	0	0	0	0	0	0	0	0	0	0	0	0	0	0									512	0	0	0	0	0	0	0	0	0	0	0	0	0	0	0	0	0	0	0
	513	0	0	0	0	0	0	0	0	0	0	0	0	0	0	0	0	0	0	0	0									513	0	0	0	0	0	0	0	0	0	0	0	0	0	0	0	0	0	0	0
	514	0	0	0	0	0	0	0	0	0	0	0	0	0	0	0	0	0	0	0	0									514	0	0	0	0	0	0	0	0	0	0	0	0	0	0	0	0	0	0	0
	515	0	0	0	0	0	0	0	0	0	0	0	0	0	0	0	0	0	0	0	0									515	0	0	0	0	0	0	0	0	0	0	0	0	0	0	0	0	0	0	0
	516	0	0	0	0	0	0	0	0	0	0	0	0	0	0	0	0	0	0	0	0									516	0	0	0	0	0	0	0	0	0	0	0	0	0	0	0	0	0	0	0
	517	0	0	0	0	0	0	0	0	0	0	0	0	0	0	0	0	0	0	0	0									517	0	0	0	0	0	0	0	0	0	0	0	0	0	0	0	0	0	0	0
	518	0	0	0	0	0	0	0	0	0	0	0	0	0	0	0	0	0	0	0	0									518	0	0	0	0	0	0	0	0	0	0	0	0	0	0	0	0	0	0	0
	519	0	0	0	0	0	0	0	0	0	0	0	0	0	0	0	0	0	0	0	0									519	0	0	0	0	0	0	0	0	0	0	0	0	0	0	0	0	0	0	0
	520	0	0	0	0	0	0	0	0	0	0	0	0	0	0	0	0	0	0	0	0									520	0	0	0	0	0	0	0	0	0	0	0	0	0	0	0	0	0	0	0
	521	0	0	0	0	0	0	0	0	0	0	0	0	0	0	0	0	0	0	0	0									521	0	0	0	0	0	0	0	0	0	0	0	0	0	0	0	0	0	0	0
	522	0	0	0	0	0	0	0	0	0	0	0	0	0	0	0	0	0	0	0	0									522	0	0	0	0	0	0	0	0	0	0	0	0	0	0	0	0	0	0	0
	523	0	0	0	0	0	0	0	0	0	0	0	0	0	0	0	0	0	0	0	0									523	0	0	0	0	0	0	0	0	0	0	0	0	0	0	0	0	0	0	0
	524	0	0	0	0	0	0	0	0	0	0	0	0	0	0	0	0	0	0	0	0									524	0	0	0	0	0	0	0	0	0	0	0	0	0	0	0	0	0	0	0
	525	0	0	0	0	0	0	0	0	0	0	0	0	0	0	0	0	0	0	0	0									525	0	0	0	0	0	0	0	0	0	0	0	0	0	0	0	0	0	0	0
	526	0	0	0	0	0	0	0	0	0	0	0	0	0	0	0	0	0	0	0	0									526	0	0	0	0	0	0	0	0	0	0	0	0	0	0	0	0	0	0	0
	527	0	0	0	0	0	0	0	0	0	0	0	0	0	0	0	0	0	0	0	0									527	0	0	0	0	0	0	0	0	0	0	0	0	0	0	0	0	0	0	0
	528	0	0	0	0	0	0	0	0	0	0	0	0	0	0	0	0	0	0	0	0									528	0	0	0	0	0	0	0	0	0	0	0	0	0	0	0	0	0	0	0
	529	0	0	0	0	0	0	0	0	0	0	0	0	0	0	0	0	0	0	0	0									529	0	0	0	0	0	0	0	0	0	0	0	0	0	0	0	0	0	0	0
	530	0	0	0	0	0	0	0	0	0	0	0	0	0	0	0	0	0	0	0	0									530	0	0	0	0	0	0	0	0	0	0	0	0	0	0	0	0	0	0	0
	531	0	0	0	0	0	0	0	0	0	0	0	0	0	0	0	0	0	0	0	0									531	0	0	0	0	0	0	0	0	0	0	0	0	0	0	0	0	0	0	0
	532	0	0	0	0	0	0	0	0	0	0	0	0	0	0	0	0	0	0	0	0									532	0	0	0	0	0	0	0	0	0	0	0	0	0	0	0	0	0	0	0
	533	0	0	0	0	0	0	0	0	0	0	0	0	0	0	0	0	0	0	0	0									533	0	0	0	0	0	0	0	0	0	0	0	0	0	0	0	0	0	0	0
	534	0	0	0	0	0	0	0	0	0	0	0	0	0	0	0	0	0	0	0	0									534	0	0	0	0	0	0	0	0	0	0	0	0	0	0	0	0	0	0	0
	535	0	0	0	0	0	0	0	0	0	0	0	0	0	0	0	0	0	0	0	0									535	0	0	0	0	0	0	0	0	0	0	0	0	0	0	0	0	0	0	0
	536	0	0	0	0	0	0	0	0	0	0	0	0	0	0	0	0	0	0	0	0									536	0	0	0	0	0	0	0	0	0	0	0	0	0	0	0	0	0	0	0
	537	0	0	0	0	0	0	0	0	0	0	0	0	0	0	0	0	0	0	0	0									537	0	0	0	0	0	0	0	0	0	0	0	0	0	0	0	0	0	0	0
	538	0	0	0	0	0	0	0	0	0	0	0	0	0	0	0	0	0	0	0	0									538	0	0	0	0	0	0	0	0	0	0	0	0	0	0	0	0	0	0	0
	539	0	0	0	0	0	0	0	0	0	0	0	0	0	0	0	0	0	0	0	0									539	0	0	0	0	0	0	0	0	0	0	0	0	0	0	0	0	0	0	0
	540	0	0	0	0	0	0	0	0	0	0	0	0	0	0	0	0	0	0	0	0									540	0	0	0	0	0	0	0	0	0	0	0	0	0	0	0	0	0	0	0
	541	0	0	0	0	0	0	0	0	0	0	0	0	0	0	0	0	0	0	0	0									541	0	0	0	0	0	0	0	0	0	0	0	0	0	0	0	0	0	0	0
	542	0	0	0	0	0	0	0	0	0	0	0	0	0	0	0	0	0	0	0	0									542	0	0	0	0	0	0	0	0	0	0	0	0	0	0	0	0	0	0	0
	543	0	0	0	0	0	0	0	0	0	0	0	0	0	0	0	0	0	0	0	0									543	0	0	0	0	0	0	0	0	0	0	0	0	0	0	0	0	0	0	0
	544	0	0	0	0	0	0	0	0	0	0	0	0	0	0	0	0	0	0	0	0									544	0	0	0	0	0	0	0	0	0	0	0	0	0	0	0	0	0	0	0
	545	0	0	0	0	0	0	0	0	0	0	0	0	0	0	0	0	0	0	0	0									545	0	0	0	0	0	0	0	0	0	0	0	0	0	0	0	0	0	0	0
	546	0	0	0	0	0	0	0	0	0	0	0	0	0	0	0	0	0	0	0	0									546	0	0	0	0	0	0	0	0	0	0	0	0	0	0	0	0	0	0	0
	547	0	0	0	0	0	0	0	0	0	0	0	0	0	0	0	0	0	0	0	0									547	0	0	0	0	0	0	0	0	0	0	0	0	0	0	0	0	0	0	0
	548	0	0	0	0	0	0	0	0	0	0	0	0	0	0	0	0	0	0	0	0									548	0	0	0	0	0	0	0	0	0	0	0	0	0	0	0	0	0	0	0
	549	0	0	0	0	0	0	0	0	0	0	0	0	0	0	0	0	0	0	0	0									549	0	0	0	0	0	0	0	0	0	0	0	0	0	0	0	0	0	0	0
	550	0	0	0	0	0	0	0	0	0	0	0	0	0	0	0	0	0	0	0	0									550	0	0	0	0	0	0	0	0	0	0	0	0	0	0	0	0	0	0	0
	551	0	0	0	0	0	0	0	0	0	0	0	0	0	0	0	0	0	0	0	0									551	0	0	0	0	0	0	0	0	0	0	0	0	0	0	0	0	0	0	0
	552	0	0	0	0	0	0	0	0	0	0	0	0	0	0	0	0	0	0	0	0									552	0	0	0	0	0	0	0	0	0	0	0	0	0	0	0	0	0	0	0
	553	0	0	0	0	0	0	0	0	0	0	0	0	0	0	0	0	0	0	0	0									553	0	0	0	0	0	0	0	0	0	0	0	0	0	0	0	0	0	0	0
	554	0	0	0	0	0	0	0	0	0	0	0	0	0	0	0	0	0	0	0	0									554	0	0	0	0	0	0	0	0	0	0	0	0	0	0	0	0	0	0	0
	555	0	0	0	0	0	0	0	0	0	0	0	0	0	0	0	0	0	0	0	0									555	0	0	0	0	0	0	0	0	0	0	0	0	0	0	0	0	0	0	0
	556	0	0	0	0	0	0	0	0	0	0	0	0	0	0	0	0	0	0	0	0									556	0	0	0	0	0	0	0	0	0	0	0	0	0	0	0	0	0	0	0
	557	0	0	0	0	0	0	0	0	0	0	0	0	0	0	0	0	0	0	0	0									557	0	0	0	0	0	0	0	0	0	0	0	0	0	0	0	0	0	0	0
	558	0	0	0	0	0	0	0	0	0	0	0	0	0	0	0	0	0	0	0	0									558	0	0	0	0	0	0	0	0	0	0	0	0	0	0	0	0	0	0	0
	559	0	0	0	0	0	0	0	0	0	0	0	0	0	0	0	0	0	0	0	0									559	0	0	0	0	0	0	0	0	0	0	0	0	0	0	0	0	0	0	0
	560	0	0	0	0	0	0	0	0	0	0	0	0	0	0	0	0	0	0	0	0									560	0	0	0	0	0	0	0	0	0	0	0	0	0	0	0	0	0	0	0
	561	0	0	0	0	0	0	0	0	0	0	0	0	0	0	0	0	0	0	0	0									561	0	0	0	0	0	0	0	0	0	0	0	0	0	0	0	0	0	0	0
	562	0	0	0	0	0	0	0	0	0	0	0	0	0	0	0	0	0	0	0	0									562	0	0	0	0	0	0	0	0	0	0	0	0	0	0	0	0	0	0	0
	563	0	0	0	0	0	0	0	0	0	0	0	0	0	0	0	0	0	0	0	0									563	0	0	0	0	0	0	0	0	0	0	0	0	0	0	0	0	0	0	0
	564	0	0	0	0	0	0	0	0	0	0	0	0	0	0	0	0	0	0	0	0									564	0	0	0	0	0	0	0	0	0	0	0	0	0	0	0	0	0	0	0
	565	0	0	0	0	0	0	0	0	0	0	0	0	0	0	0	0	0	0	0	0									565	0	0	0	0	0	0	0	0	0	0	0	0	0	0	0	0	0	0	0
	566	0	0	0	0	0	0	0	0	0	0	0	0	0	0	0	0	0	0	0	0									566	0	0	0	0	0	0	0	0	0	0	0	0	0	0	0	0	0	0	0
	567	0	0	0	0	0	0	0	0	0	0	0	0	0	0	0	0	0	0	0	0									567	0	0	0	0	0	0	0	0	0	0	0	0	0	0	0	0	0	0	0
	568	0	0	0	0	0	0	0	0	0	0	0	0	0	0	0	0	0	0	0	0									568	0	0	0	0	0	0	0	0	0	0	0	0	0	0	0	0	0	0	0
	569	0	0	0	0	0	0	0	0	0	0	0	0	0	0	0	0	0	0	0	0									569	0	0	0	0	0	0	0	0	0	0	0	0	0	0	0	0	0	0	0
	570	0	0	0	0	0	0	0	0	0	0	0	0	0	0	0	0	0	0	0	0									570	0	0	0	0	0	0	0	0	0	0	0	0	0	0	0	0	0	0	0
	571	0	0	0	0	0	0	0	0	0	0	0	0	0	0	0	0	0	0	0	0									571	0	0	0	0	0	0	0	0	0	0	0	0	0	0	0	0	0	0	0
	572	0	0	0	0	0	0	0	0	0	0	0	0	0	0	0	0	0	0	0	0									572	0	0	0	0	0	0	0	0	0	0	0	0	0	0	0	0	0	0	0
	573	0	0	0	0	0	0	0	0	0	0	0	0	0	0	0	0	0	0	0	0									573	0	0	0	0	0	0	0	0	0	0	0	0	0	0	0	0	0	0	0
	574	0	0	0	0	0	0	0	0	0	0	0	0	0	0	0	0	0	0	0	0									574	0	0	0	0	0	0	0	0	0	0	0	0	0	0	0	0	0	0	0
	575	0	0	0	0	0	0	0	0	0	0	0	0	0	0	0	0	0	0	0	0									575	0	0	0	0	0	0	0	0	0	0	0	0	0	0	0	0	0	0	0
	576	0	0	0	0	0	0	0	0	0	0	0	0	0	0	0	0	0	0	0	0									576	0	0	0	0	0	0	0	0	0	0	0	0	0	0	0	0	0	0	0
	577	0	0	0	0	0	0	0	0	0	0	0	0	0	0	0	0	0	0	0	0									577	0	0	0	0	0	0	0	0	0	0	0	0	0	0	0	0	0	0	0
	578	0	0	0	0	0	0	0	0	0	0	0	0	0	0	0	0	0	0	0	0									578	0	0	0	0	0	0	0	0	0	0	0	0	0	0	0	0	0	0	0
	579	0	0	0	0	0	0	0	0	0	0	0	0	0	0	0	0	0	0	0	0									579	0	0	0	0	0	0	0	0	0	0	0	0	0	0	0	0	0	0	0
	580	0	0	0	0	0	0	0	0	0	0	0	0	0	0	0	0	0	0	0	0									580	0	0	0	0	0	0	0	0	0	0	0	0	0	0	0	0	0	0	0
	581	0	0	0	0	0	0	0	0	0	0	0	0	0	0	0	0	0	0	0	0									581	0	0	0	0	0	0	0	0	0	0	0	0	0	0	0	0	0	0	0
	582	0	0	0	0	0	0	0	0	0	0	0	0	0	0	0	0	0	0	0	0									582	0	0	0	0	0	0	0	0	0	0	0	0	0	0	0	0	0	0	0
	583	0	0	0	0	0	0	0	0	0	0	0	0	0	0	0	0	0	0	0	0									583	0	0	0	0	0	0	0	0	0	0	0	0	0	0	0	0	0	0	0
	584	0	0	0	0	0	0	0	0	0	0	0	0	0	0	0	0	0	0	0	0									584	0	0	0	0	0	0	0	0	0	0	0	0	0	0	0	0	0	0	0
	585	0	0	0	0	0	0	0	0	0	0	0	0	0	0	0	0	0	0	0	0									585	0	0	0	0	0	0	0	0	0	0	0	0	0	0	0	0	0	0	0
	586	0	0	0	0	0	0	0	0	0	0	0	0	0	0	0	0	0	0	0	0									586	0	0	0	0	0	0	0	0	0	0	0	0	0	0	0	0	0	0	0
	587	0	0	0	0	0	0	0	0	0	0	0	0	0	0	0	0	0	0	0	0									587	0	0	0	0	0	0	0	0	0	0	0	0	0	0	0	0	0	0	0
	588	0	0	0	0	0	0	0	0	0	0	0	0	0	0	0	0	0	0	0	0									588	0	0	0	0	0	0	0	0	0	0	0	0	0	0	0	0	0	0	0
	589	0	0	0	0	0	0	0	0	0	0	0	0	0	0	0	0	0	0	0	0									589	0	0	0	0	0	0	0	0	0	0	0	0	0	0	0	0	0	0	0
	590	0	0	0	0	0	0	0	0	0	0	0	0	0	0	0	0	0	0	0	0									590	0	0	0	0	0	0	0	0	0	0	0	0	0	0	0	0	0	0	0
	591	0	0	0	0	0	0	0	0	0	0	0	0	0	0	0	0	0	0	0	0									591	0	0	0	0	0	0	0	0	0	0	0	0	0	0	0	0	0	0	0
	592	0	0	0	0	0	0	0	0	0	0	0	0	0	0	0	0	0	0	0	0									592	0	0	0	0	0	0	0	0	0	0	0	0	0	0	0	0	0	0	0
	593	0	0	0	0	0	0	0	0	0	0	0	0	0	0	0	0	0	0	0	0									593	0	0	0	0	0	0	0	0	0	0	0	0	0	0	0	0	0	0	0
	594	0	0	0	0	0	0	0	0	0	0	0	0	0	0	0	0	0	0	0	0									594	0	0	0	0	0	0	0	0	0	0	0	0	0	0	0	0	0	0	0
	595	0	0	0	0	0	0	0	0	0	0	0	0	0	0	0	0	0	0	0	0									595	0	0	0	0	0	0	0	0	0	0	0	0	0	0	0	0	0	0	0
	596	0	0	0	0	0	0	0	0	0	0	0	0	0	0	0	0	0	0	0	0									596	0	0	0	0	0	0	0	0	0	0	0	0	0	0	0	0	0	0	0
	597	0	0	0	0	0	0	0	0	0	0	0	0	0	0	0	0	0	0	0	0									597	0	0	0	0	0	0	0	0	0	0	0	0	0	0	0	0	0	0	0
	598	0	0	0	0	0	0	0	0	0	0	0	0	0	0	0	0	0	0	0	0									598	0	0	0	0	0	0	0	0	0	0	0	0	0	0	0	0	0	0	0
	599	0	0	0	0	0	0	0	0	0	0	0	0	0	0	0	0	0	0	0	0									599	0	0	0	0	0	0	0	0	0	0	0	0	0	0	0	0	0	0	0
	600	0	0	0	0	0	0	0	0	0	0	0	0	0	0	0	0	0	0	0	0									600	0	0	0	0	0	0	0	0	0	0	0	0	0	0	0	0	0	0	0
	601	0	0	0	0	0	0	0	0	0	0	0	0	0	0	0	0	0	0	0	0									601	0	0	0	0	0	0	0	0	0	0	0	0	0	0	0	0	0	0	0
	602	0	0	0	0	0	0	0	0	0	0	0	0	0	0	0	0	0	0	0	0									602	0	0	0	0	0	0	0	0	0	0	0	0	0	0	0	0	0	0	0
	603	0	0	0	0	0	0	0	0	0	0	0	0	0	0	0	0	0	0	0	0									603	0	0	0	0	0	0	0	0	0	0	0	0	0	0	0	0	0	0	0
	604	0	0	0	0	0	0	0	0	0	0	0	0	0	0	0	0	0	0	0	0									604	0	0	0	0	0	0	0	0	0	0	0	0	0	0	0	0	0	0	0
	605	0	0	0	0	0	0	0	0	0	0	0	0	0	0	0	0	0	0	0	0									605	0	0	0	0	0	0	0	0	0	0	0	0	0	0	0	0	0	0	0
	606	0	0	0	0	0	0	0	0	0	0	0	0	0	0	0	0	0	0	0	0									606	0	0	0	0	0	0	0	0	0	0	0	0	0	0	0	0	0	0	0
	607	0	0	0	0	0	0	0	0	0	0	0	0	0	0	0	0	0	0	0	0									607	0	0	0	0	0	0	0	0	0	0	0	0	0	0	0	0	0	0	0
	608	0	0	0	0	0	0	0	0	0	0	0	0	0	0	0	0	0	0	0	0									608	0	0	0	0	0	0	0	0	0	0	0	0	0	0	0	0	0	0	0
	609	0	0	0	0	0	0	0	0	0	0	0	0	0	0	0	0	0	0	0	0									609	0	0	0	0	0	0	0	0	0	0	0	0	0	0	0	0	0	0	0
	610	0	0	0	0	0	0	0	0	0	0	0	0	0	0	0	0	0	0	0	0									610	0	0	0	0	0	0	0	0	0	0	0	0	0	0	0	0	0	0	0
	611	0	0	0	0	0	0	0	0	0	0	0	0	0	0	0	0	0	0	0	0									611	0	0	0	0	0	0	0	0	0	0	0	0	0	0	0	0	0	0	0
	612	0	0	0	0	0	0	0	0	0	0	0	0	0	0	0	0	0	0	0	0									612	0	0	0	0	0	0	0	0	0	0	0	0	0	0	0	0	0	0	0
	613	0	0	0	0	0	0	0	0	0	0	0	0	0	0	0	0	0	0	0	0									613	0	0	0	0	0	0	0	0	0	0	0	0	0	0	0	0	0	0	0
	614	0	0	0	0	0	0	0	0	0	0	0	0	0	0	0	0	0	0	0	0									614	0	0	0	0	0	0	0	0	0	0	0	0	0	0	0	0	0	0	0
	615	0	0	0	0	0	0	0	0	0	0	0	0	0	0	0	0	0	0	0	0									615	0	0	0	0	0	0	0	0	0	0	0	0	0	0	0	0	0	0	0
	616	0	0	0	0	0	0	0	0	0	0	0	0	0	0	0	0	0	0	0	0									616	0	0	0	0	0	0	0	0	0	0	0	0	0	0	0	0	0	0	0
	617	0	0	0	0	0	0	0	0	0	0	0	0	0	0	0	0	0	0	0	0									617	0	0	0	0	0	0	0	0	0	0	0	0	0	0	0	0	0	0	0
	618	0	0	0	0	0	0	0	0	0	0	0	0	0	0	0	0	0	0	0	0									618	0	0	0	0	0	0	0	0	0	0	0	0	0	0	0	0	0	0	0
	619	0	0	0	0	0	0	0	0	0	0	0	0	0	0	0	0	0	0	0	0									619	0	0	0	0	0	0	0	0	0	0	0	0	0	0	0	0	0	0	0
	620	0	0	0	0	0	0	0	0	0	0	0	0	0	0	0	0	0	0	0	0									620	0	0	0	0	0	0	0	0	0	0	0	0	0	0	0	0	0	0	0
	621	0	0	0	0	0	0	0	0	0	0	0	0	0	0	0	0	0	0	0	0									621	0	0	0	0	0	0	0	0	0	0	0	0	0	0	0	0	0	0	0
	622	0	0	0	0	0	0	0	0	0	0	0	0	0	0	0	0	0	0	0	0									622	0	0	0	0	0	0	0	0	0	0	0	0	0	0	0	0	0	0	0
	623	0	0	0	0	0	0	0	0	0	0	0	0	0	0	0	0	0	0	0	0									623	0	0	0	0	0	0	0	0	0	0	0	0	0	0	0	0	0	0	0
	624	0	0	0	0	0	0	0	0	0	0	0	0	0	0	0	0	0	0	0	0									624	0	0	0	0	0	0	0	0	0	0	0	0	0	0	0	0	0	0	0
	625	0	0	0	0	0	0	0	0	0	0	0	0	0	0	0	0	0	0	0	0									625	0	0	0	0	0	0	0	0	0	0	0	0	0	0	0	0	0	0	0
	626	0	0	0	0	0	0	0	0	0	0	0	0	0	0	0	0	0	0	0	0									626	0	0	0	0	0	0	0	0	0	0	0	0	0	0	0	0	0	0	0
	627	0	0	0	0	0	0	0	0	0	0	0	0	0	0	0	0	0	0	0	0									627	0	0	0	0	0	0	0	0	0	0	0	0	0	0	0	0	0	0	0
	628	0	0	0	0	0	0	0	0	0	0	0	0	0	0	0	0	0	0	0	0									628	0	0	0	0	0	0	0	0	0	0	0	0	0	0	0	0	0	0	0
	629	0	0	0	0	0	0	0	0	0	0	0	0	0	0	0	0	0	0	0	0									629	0	0	0	0	0	0	0	0	0	0	0	0	0	0	0	0	0	0	0
	630	0	0	0	0	0	0	0	0	0	0	0	0	0	0	0	0	0	0	0	0									630	0	0	0	0	0	0	0	0	0	0	0	0	0	0	0	0	0	0	0
	631	0	0	0	0	0	0	0	0	0	0	0	0	0	0	0	0	0	0	0	0									631	0	0	0	0	0	0	0	0	0	0	0	0	0	0	0	0	0	0	0
	632	0	0	0	0	0	0	0	0	0	0	0	0	0	0	0	0	0	0	0	0									632	0	0	0	0	0	0	0	0	0	0	0	0	0	0	0	0	0	0	0
	633	0	0	0	0	0	0	0	0	0	0	0	0	0	0	0	0	0	0	0	0									633	0	0	0	0	0	0	0	0	0	0	0	0	0	0	0	0	0	0	0
	634	0	0	0	0	0	0	0	0	0	0	0	0	0	0	0	0	0	0	0	0									634	0	0	0	0	0	0	0	0	0	0	0	0	0	0	0	0	0	0	0
	635	0	0	0	0	0	0	0	0	0	0	0	0	0	0	0	0	0	0	0	0									635	0	0	0	0	0	0	0	0	0	0	0	0	0	0	0	0	0	0	0
	636	0	0	0	0	0	0	0	0	0	0	0	0	0	0	0	0	0	0	0	0									636	0	0	0	0	0	0	0	0	0	0	0	0	0	0	0	0	0	0	0
	637	0	0	0	0	0	0	0	0	0	0	0	0	0	0	0	0	0	0	0	0									637	0	0	0	0	0	0	0	0	0	0	0	0	0	0	0	0	0	0	0
	638	0	0	0	0	0	0	0	0	0	0	0	0	0	0	0	0	0	0	0	0									638	0	0	0	0	0	0	0	0	0	0	0	0	0	0	0	0	0	0	0
	639	0	0	0	0	0	0	0	0	0	0	0	0	0	0	0	0	0	0	0	0									639	0	0	0	0	0	0	0	0	0	0	0	0	0	0	0	0	0	0	0
	640	0	0	0	0	0	0	0	0	0	0	0	0	0	0	0	0	0	0	0	0									640	0	0	0	0	0	0	0	0	0	0	0	0	0	0	0	0	0	0	0
	641	0	0	0	0	0	0	0	0	0	0	0	0	0	0	0	0	0	0	0	0									641	0	0	0	0	0	0	0	0	0	0	0	0	0	0	0	0	0	0	0
	642	0	0	0	0	0	0	0	0	0	0	0	0	0	0	0	0	0	0	0	0									642	0	0	0	0	0	0	0	0	0	0	0	0	0	0	0	0	0	0	0
	643	0	0	0	0	0	0	0	0	0	0	0	0	0	0	0	0	0	0	0	0									643	0	0	0	0	0	0	0	0	0	0	0	0	0	0	0	0	0	0	0
	644	0	0	0	0	0	0	0	0	0	0	0	0	0	0	0	0	0	0	0	0									644	0	0	0	0	0	0	0	0	0	0	0	0	0	0	0	0	0	0	0
	645	0	0	0	0	0	0	0	0	0	0	0	0	0	0	0	0	0	0	0	0									645	0	0	0	0	0	0	0	0	0	0	0	0	0	0	0	0	0	0	0
	646	0	0	0	0	0	0	0	0	0	0	0	0	0	0	0	0	0	0	0	0									646	0	0	0	0	0	0	0	0	0	0	0	0	0	0	0	0	0	0	0
	647	0	0	0	0	0	0	0	0	0	0	0	0	0	0	0	0	0	0	0	0									647	0	0	0	0	0	0	0	0	0	0	0	0	0	0	0	0	0	0	0
	648	0	0	0	0	0	0	0	0	0	0	0	0	0	0	0	0	0	0	0	0									648	0	0	0	0	0	0	0	0	0	0	0	0	0	0	0	0	0	0	0
	649	0	0	0	0	0	0	0	0	0	0	0	0	0	0	0	0	0	0	0	0									649	0	0	0	0	0	0	0	0	0	0	0	0	0	0	0	0	0	0	0
	650	0	0	0	0	0	0	0	0	0	0	0	0	0	0	0	0	0	0	0	0									650	0	0	0	0	0	0	0	0	0	0	0	0	0	0	0	0	0	0	0
	651	0	0	0	0	0	0	0	0	0	0	0	0	0	0	0	0	0	0	0	0									651	0	0	0	0	0	0	0	0	0	0	0	0	0	0	0	0	0	0	0
	652	0	0	0	0	0	0	0	0	0	0	0	0	0	0	0	0	0	0	0	0									652	0	0	0	0	0	0	0	0	0	0	0	0	0	0	0	0	0	0	0
	653	0	0	0	0	0	0	0	0	0	0	0	0	0	0	0	0	0	0	0	0									653	0	0	0	0	0	0	0	0	0	0	0	0	0	0	0	0	0	0	0
	654	0	0	0	0	0	0	0	0	0	0	0	0	0	0	0	0	0	0	0	0									654	0	0	0	0	0	0	0	0	0	0	0	0	0	0	0	0	0	0	0
	655	0	0	0	0	0	0	0	0	0	0	0	0	0	0	0	0	0	0	0	0									655	0	0	0	0	0	0	0	0	0	0	0	0	0	0	0	0	0	0	0
	656	0	0	0	0	0	0	0	0	0	0	0	0	0	0	0	0	0	0	0	0									656	0	0	0	0	0	0	0	0	0	0	0	0	0	0	0	0	0	0	0
	657	0	0	0	0	0	0	0	0	0	0	0	0	0	0	0	0	0	0	0	0									657	0	0	0	0	0	0	0	0	0	0	0	0	0	0	0	0	0	0	0
	658	0	0	0	0	0	0	0	0	0	0	0	0	0	0	0	0	0	0	0	0									658	0	0	0	0	0	0	0	0	0	0	0	0	0	0	0	0	0	0	0
	659	0	0	0	0	0	0	0	0	0	0	0	0	0	0	0	0	0	0	0	0									659	0	0	0	0	0	0	0	0	0	0	0	0	0	0	0	0	0	0	0
	660	0	0	0	0	0	0	0	0	0	0	0	0	0	0	0	0	0	0	0	0									660	0	0	0	0	0	0	0	0	0	0	0	0	0	0	0	0	0	0	0
	661	0	0	0	0	0	0	0	0	0	0	0	0	0	0	0	0	0	0	0	0									661	0	0	0	0	0	0	0	0	0	0	0	0	0	0	0	0	0	0	0
	662	0	0	0	0	0	0	0	0	0	0	0	0	0	0	0	0	0	0	0	0									662	0	0	0	0	0	0	0	0	0	0	0	0	0	0	0	0	0	0	0
	663	0	0	0	0	0	0	0	0	0	0	0	0	0	0	0	0	0	0	0	0									663	0	0	0	0	0	0	0	0	0	0	0	0	0	0	0	0	0	0	0
	664	0	0	0	0	0	0	0	0	0	0	0	0	0	0	0	0	0	0	0	0									664	0	0	0	0	0	0	0	0	0	0	0	0	0	0	0	0	0	0	0
	665	0	0	0	0	0	0	0	0	0	0	0	0	0	0	0	0	0	0	0	0									665	0	0	0	0	0	0	0	0	0	0	0	0	0	0	0	0	0	0	0
	666	0	0	0	0	0	0	0	0	0	0	0	0	0	0	0	0	0	0	0	0									666	0	0	0	0	0	0	0	0	0	0	0	0	0	0	0	0	0	0	0
	667	0	0	0	0	0	0	0	0	0	0	0	0	0	0	0	0	0	0	0	0									667	0	0	0	0	0	0	0	0	0	0	0	0	0	0	0	0	0	0	0
	668	0	0	0	0	0	0	0	0	0	0	0	0	0	0	0	0	0	0	0	0									668	0	0	0	0	0	0	0	0	0	0	0	0	0	0	0	0	0	0	0
	669	0	0	0	0	0	0	0	0	0	0	0	0	0	0	0	0	0	0	0	0									669	0	0	0	0	0	0	0	0	0	0	0	0	0	0	0	0	0	0	0
	670	0	0	0	0	0	0	0	0	0	0	0	0	0	0	0	0	0	0	0	0									670	0	0	0	0	0	0	0	0	0	0	0	0	0	0	0	0	0	0	0
	671	0	0	0	0	0	0	0	0	0	0	0	0	0	0	0	0	0	0	0	0									671	0	0	0	0	0	0	0	0	0	0	0	0	0	0	0	0	0	0	0
	672	0	0	0	0	0	0	0	0	0	0	0	0	0	0	0	0	0	0	0	0									672	0	0	0	0	0	0	0	0	0	0	0	0	0	0	0	0	0	0	0
	673	0	0	0	0	0	0	0	0	0	0	0	0	0	0	0	0	0	0	0	0									673	0	0	0	0	0	0	0	0	0	0	0	0	0	0	0	0	0	0	0
	674	0	0	0	0	0	0	0	0	0	0	0	0	0	0	0	0	0	0	0	0									674	0	0	0	0	0	0	0	0	0	0	0	0	0	0	0	0	0	0	0
	675	0	0	0	0	0	0	0	0	0	0	0	0	0	0	0	0	0	0	0	0									675	0	0	0	0	0	0	0	0	0	0	0	0	0	0	0	0	0	0	0
	676	0	0	0	0	0	0	0	0	0	0	0	0	0	0	0	0	0	0	0	0									676	0	0	0	0	0	0	0	0	0	0	0	0	0	0	0	0	0	0	0
	677	0	0	0	0	0	0	0	0	0	0	0	0	0	0	0	0	0	0	0	0									677	0	0	0	0	0	0	0	0	0	0	0	0	0	0	0	0	0	0	0
	678	0	0	0	0	0	0	0	0	0	0	0	0	0	0	0	0	0	0	0	0									678	0	0	0	0	0	0	0	0	0	0	0	0	0	0	0	0	0	0	0
	679	0	0	0	0	0	0	0	0	0	0	0	0	0	0	0	0	0	0	0	0									679	0	0	0	0	0	0	0	0	0	0	0	0	0	0	0	0	0	0	0
	680	0	0	0	0	0	0	0	0	0	0	0	0	0	0	0	0	0	0	0	0									680	0	0	0	0	0	0	0	0	0	0	0	0	0	0	0	0	0	0	0
	681	0	0	0	0	0	0	0	0	0	0	0	0	0	0	0	0	0	0	0	0									681	0	0	0	0	0	0	0	0	0	0	0	0	0	0	0	0	0	0	0
	682	0	0	0	0	0	0	0	0	0	0	0	0	0	0	0	0	0	0	0	0									682	0	0	0	0	0	0	0	0	0	0	0	0	0	0	0	0	0	0	0
	683	0	0	0	0	0	0	0	0	0	0	0	0	0	0	0	0	0	0	0	0									683	0	0	0	0	0	0	0	0	0	0	0	0	0	0	0	0	0	0	0
	684	0	0	0	0	0	0	0	0	0	0	0	0	0	0	0	0	0	0	0	0									684	0	0	0	0	0	0	0	0	0	0	0	0	0	0	0	0	0	0	0
	685	0	0	0	0	0	0	0	0	0	0	0	0	0	0	0	0	0	0	0	0									685	0	0	0	0	0	0	0	0	0	0	0	0	0	0	0	0	0	0	0
	686	0	0	0	0	0	0	0	0	0	0	0	0	0	0	0	0	0	0	0	0									686	0	0	0	0	0	0	0	0	0	0	0	0	0	0	0	0	0	0	0
	687	0	0	0	0	0	0	0	0	0	0	0	0	0	0	0	0	0	0	0	0									687	0	0	0	0	0	0	0	0	0	0	0	0	0	0	0	0	0	0	0
	688	0	0	0	0	0	0	0	0	0	0	0	0	0	0	0	0	0	0	0	0									688	0	0	0	0	0	0	0	0	0	0	0	0	0	0	0	0	0	0	0
	689	0	0	0	0	0	0	0	0	0	0	0	0	0	0	0	0	0	0	0	0									689	0	0	0	0	0	0	0	0	0	0	0	0	0	0	0	0	0	0	0
	690	0	0	0	0	0	0	0	0	0	0	0	0	0	0	0	0	0	0	0	0									690	0	0	0	0	0	0	0	0	0	0	0	0	0	0	0	0	0	0	0
	691	0	0	0	0	0	0	0	0	0	0	0	0	0	0	0	0	0	0	0	0									691	0	0	0	0	0	0	0	0	0	0	0	0	0	0	0	0	0	0	0
	692	0	0	0	0	0	0	0	0	0	0	0	0	0	0	0	0	0	0	0	0									692	0	0	0	0	0	0	0	0	0	0	0	0	0	0	0	0	0	0	0
	693	0	0	0	0	0	0	0	0	0	0	0	0	0	0	0	0	0	0	0	0									693	0	0	0	0	0	0	0	0	0	0	0	0	0	0	0	0	0	0	0
	694	0	0	0	0	0	0	0	0	0	0	0	0	0	0	0	0	0	0	0	0									694	0	0	0	0	0	0	0	0	0	0	0	0	0	0	0	0	0	0	0
	695	0	0	0	0	0	0	0	0	0	0	0	0	0	0	0	0	0	0	0	0									695	0	0	0	0	0	0	0	0	0	0	0	0	0	0	0	0	0	0	0
	696	0	0	0	0	0	0	0	0	0	0	0	0	0	0	0	0	0	0	0	0									696	0	0	0	0	0	0	0	0	0	0	0	0	0	0	0	0	0	0	0
	697	0	0	0	0	0	0	0	0	0	0	0	0	0	0	0	0	0	0	0	0									697	0	0	0	0	0	0	0	0	0	0	0	0	0	0	0	0	0	0	0
	698	0	0	0	0	0	0	0	0	0	0	0	0	0	0	0	0	0	0	0	0									698	0	0	0	0	0	0	0	0	0	0	0	0	0	0	0	0	0	0	0
	699	0	0	0	0	0	0	0	0	0	0	0	0	0	0	0	0	0	0	0	0									699	0	0	0	0	0	0	0	0	0	0	0	0	0	0	0	0	0	0	0
	700	0	0	0	0	0	0	0	0	0	0	0	0	0	0	0	0	0	0	0	0									700	0	0	0	0	0	0	0	0	0	0	0	0	0	0	0	0	0	0	0
	701	0	0	0	0	0	0	0	0	0	0	0	0	0	0	0	0	0	0	0	0									701	0	0	0	0	0	0	0	0	0	0	0	0	0	0	0	0	0	0	0
	702	0	0	0	0	0	0	0	0	0	0	0	0	0	0	0	0	0	0	0	0									702	0	0	0	0	0	0	0	0	0	0	0	0	0	0	0	0	0	0	0
	703	0	0	0	0	0	0	0	0	0	0	0	0	0	0	0	0	0	0	0	0									703	0	0	0	0	0	0	0	0	0	0	0	0	0	0	0	0	0	0	0
	704	0	0	0	0	0	0	0	0	0	0	0	0	0	0	0	0	0	0	0	0									704	0	0	0	0	0	0	0	0	0	0	0	0	0	0	0	0	0	0	0
	705	0	0	0	0	0	0	0	0	0	0	0	0	0	0	0	0	0	0	0	0									705	0	0	0	0	0	0	0	0	0	0	0	0	0	0	0	0	0	0	0
	706	0	0	0	0	0	0	0	0	0	0	0	0	0	0	0	0	0	0	0	0									706	0	0	0	0	0	0	0	0	0	0	0	0	0	0	0	0	0	0	0
	707	0	0	0	0	0	0	0	0	0	0	0	0	0	0	0	0	0	0	0	0									707	0	0	0	0	0	0	0	0	0	0	0	0	0	0	0	0	0	0	0
	708	0	0	0	0	0	0	0	0	0	0	0	0	0	0	0	0	0	0	0	0									708	0	0	0	0	0	0	0	0	0	0	0	0	0	0	0	0	0	0	0
	709	0	0	0	0	0	0	0	0	0	0	0	0	0	0	0	0	0	0	0	0									709	0	0	0	0	0	0	0	0	0	0	0	0	0	0	0	0	0	0	0
	710	0	0	0	0	0	0	0	0	0	0	0	0	0	0	0	0	0	0	0	0									710	0	0	0	0	0	0	0	0	0	0	0	0	0	0	0	0	0	0	0
	711	0	0	0	0	0	0	0	0	0	0	0	0	0	0	0	0	0	0	0	0									711	0	0	0	0	0	0	0	0	0	0	0	0	0	0	0	0	0	0	0
	712	0	0	0	0	0	0	0	0	0	0	0	0	0	0	0	0	0	0	0	0									712	0	0	0	0	0	0	0	0	0	0	0	0	0	0	0	0	0	0	0
	713	0	0	0	0	0	0	0	0	0	0	0	0	0	0	0	0	0	0	0	0									713	0	0	0	0	0	0	0	0	0	0	0	0	0	0	0	0	0	0	0
	714	0	0	0	0	0	0	0	0	0	0	0	0	0	0	0	0	0	0	0	0									714	0	0	0	0	0	0	0	0	0	0	0	0	0	0	0	0	0	0	0
	715	0	0	0	0	0	0	0	0	0	0	0	0	0	0	0	0	0	0	0	0									715	0	0	0	0	0	0	0	0	0	0	0	0	0	0	0	0	0	0	0
	716	0	0	0	0	0	0	0	0	0	0	0	0	0	0	0	0	0	0	0	0									716	0	0	0	0	0	0	0	0	0	0	0	0	0	0	0	0	0	0	0
	717	0	0	0	0	0	0	0	0	0	0	0	0	0	0	0	0	0	0	0	0									717	0	0	0	0	0	0	0	0	0	0	0	0	0	0	0	0	0	0	0
	718	0	0	0	0	0	0	0	0	0	0	0	0	0	0	0	0	0	0	0	0									718	0	0	0	0	0	0	0	0	0	0	0	0	0	0	0	0	0	0	0
	719	0	0	0	0	0	0	0	0	0	0	0	0	0	0	0	0	0	0	0	0									719	0	0	0	0	0	0	0	0	0	0	0	0	0	0	0	0	0	0	0
	720	0	0	0	0	0	0	0	0	0	0	0	0	0	0	0	0	0	0	0	0									720	0	0	0	0	0	0	0	0	0	0	0	0	0	0	0	0	0	0	0
	721	0	0	0	0	0	0	0	0	0	0	0	0	0	0	0	0	0	0	0	0									721	0	0	0	0	0	0	0	0	0	0	0	0	0	0	0	0	0	0	0
	722	0	0	0	0	0	0	0	0	0	0	0	0	0	0	0	0	0	0	0	0									722	0	0	0	0	0	0	0	0	0	0	0	0	0	0	0	0	0	0	0
	723	0	0	0	0	0	0	0	0	0	0	0	0	0	0	0	0	0	0	0	0									723	0	0	0	0	0	0	0	0	0	0	0	0	0	0	0	0	0	0	0
	724	0	0	0	0	0	0	0	0	0	0	0	0	0	0	0	0	0	0	0	0									724	0	0	0	0	0	0	0	0	0	0	0	0	0	0	0	0	0	0	0
	725	0	0	0	0	0	0	0	0	0	0	0	0	0	0	0	0	0	0	0	0									725	0	0	0	0	0	0	0	0	0	0	0	0	0	0	0	0	0	0	0
	726	0	0	0	0	0	0	0	0	0	0	0	0	0	0	0	0	0	0	0	0									726	0	0	0	0	0	0	0	0	0	0	0	0	0	0	0	0	0	0	0
	727	0	0	0	0	0	0	0	0	0	0	0	0	0	0	0	0	0	0	0	0									727	0	0	0	0	0	0	0	0	0	0	0	0	0	0	0	0	0	0	0
	728	0	0	0	0	0	0	0	0	0	0	0	0	0	0	0	0	0	0	0	0									728	0	0	0	0	0	0	0	0	0	0	0	0	0	0	0	0	0	0	0
	729	0	0	0	0	0	0	0	0	0	0	0	0	0	0	0	0	0	0	0	0									729	0	0	0	0	0	0	0	0	0	0	0	0	0	0	0	0	0	0	0
	730	0	0	0	0	0	0	0	0	0	0	0	0	0	0	0	0	0	0	0	0									730	0	0	0	0	0	0	0	0	0	0	0	0	0	0	0	0	0	0	0
	731	0	0	0	0	0	0	0	0	0	0	0	0	0	0	0	0	0	0	0	0									731	0	0	0	0	0	0	0	0	0	0	0	0	0	0	0	0	0	0	0
	732	0	0	0	0	0	0	0	0	0	0	0	0	0	0	0	0	0	0	0	0									732	0	0	0	0	0	0	0	0	0	0	0	0	0	0	0	0	0	0	0
	733	0	0	0	0	0	0	0	0	0	0	0	0	0	0	0	0	0	0	0	0									733	0	0	0	0	0	0	0	0	0	0	0	0	0	0	0	0	0	0	0
	734	0	0	0	0	0	0	0	0	0	0	0	0	0	0	0	0	0	0	0	0									734	0	0	0	0	0	0	0	0	0	0	0	0	0	0	0	0	0	0	0
	735	0	0	0	0	0	0	0	0	0	0	0	0	0	0	0	0	0	0	0	0									735	0	0	0	0	0	0	0	0	0	0	0	0	0	0	0	0	0	0	0
	736	0	0	0	0	0	0	0	0	0	0	0	0	0	0	0	0	0	0	0	0									736	0	0	0	0	0	0	0	0	0	0	0	0	0	0	0	0	0	0	0
	737	0	0	0	0	0	0	0	0	0	0	0	0	0	0	0	0	0	0	0	0									737	0	0	0	0	0	0	0	0	0	0	0	0	0	0	0	0	0	0	0
	738	0	0	0	0	0	0	0	0	0	0	0	0	0	0	0	0	0	0	0	0									738	0	0	0	0	0	0	0	0	0	0	0	0	0	0	0	0	0	0	0
	739	0	0	0	0	0	0	0	0	0	0	0	0	0	0	0	0	0	0	0	0									739	0	0	0	0	0	0	0	0	0	0	0	0	0	0	0	0	0	0	0
	740	0	0	0	0	0	0	0	0	0	0	0	0	0	0	0	0	0	0	0	0									740	0	0	0	0	0	0	0	0	0	0	0	0	0	0	0	0	0	0	0
	741	0	0	0	0	0	0	0	0	0	0	0	0	0	0	0	0	0	0	0	0									741	0	0	0	0	0	0	0	0	0	0	0	0	0	0	0	0	0	0	0
	742	0	0	0	0	0	0	0	0	0	0	0	0	0	0	0	0	0	0	0	0									742	0	0	0	0	0	0	0	0	0	0	0	0	0	0	0	0	0	0	0
	743	0	0	0	0	0	0	0	0	0	0	0	0	0	0	0	0	0	0	0	0									743	0	0	0	0	0	0	0	0	0	0	0	0	0	0	0	0	0	0	0
	744	0	0	0	0	0	0	0	0	0	0	0	0	0	0	0	0	0	0	0	0									744	0	0	0	0	0	0	0	0	0	0	0	0	0	0	0	0	0	0	0
	745	0	0	0	0	0	0	0	0	0	0	0	0	0	0	0	0	0	0	0	0									745	0	0	0	0	0	0	0	0	0	0	0	0	0	0	0	0	0	0	0
	746	0	0	0	0	0	0	0	0	0	0	0	0	0	0	0	0	0	0	0	0									746	0	0	0	0	0	0	0	0	0	0	0	0	0	0	0	0	0	0	0
	747	0	0	0	0	0	0	0	0	0	0	0	0	0	0	0	0	0	0	0	0									747	0	0	0	0	0	0	0	0	0	0	0	0	0	0	0	0	0	0	0
	748	0	0	0	0	0	0	0	0	0	0	0	0	0	0	0	0	0	0	0	0									748	0	0	0	0	0	0	0	0	0	0	0	0	0	0	0	0	0	0	0
	749	0	0	0	0	0	0	0	0	0	0	0	0	0	0	0	0	0	0	0	0									749	0	0	0	0	0	0	0	0	0	0	0	0	0	0	0	0	0	0	0
	750	0	0	0	0	0	0	0	0	0	0	0	0	0	0	0	0	0	0	0	0									750	0	0	0	0	0	0	0	0	0	0	0	0	0	0	0	0	0	0	0
	751	0	0	0	0	0	0	0	0	0	0	0	0	0	0	0	0	0	0	0	0									751	0	0	0	0	0	0	0	0	0	0	0	0	0	0	0	0	0	0	0
	752	0	0	0	0	0	0	0	0	0	0	0	0	0	0	0	0	0	0	0	0									752	0	0	0	0	0	0	0	0	0	0	0	0	0	0	0	0	0	0	0
	753	0	0	0	0	0	0	0	0	0	0	0	0	0	0	0	0	0	0	0	0									753	0	0	0	0	0	0	0	0	0	0	0	0	0	0	0	0	0	0	0
	754	0	0	0	0	0	0	0	0	0	0	0	0	0	0	0	0	0	0	0	0									754	0	0	0	0	0	0	0	0	0	0	0	0	0	0	0	0	0	0	0
	755	0	0	0	0	0	0	0	0	0	0	0	0	0	0	0	0	0	0	0	0									755	0	0	0	0	0	0	0	0	0	0	0	0	0	0	0	0	0	0	0
	756	0	0	0	0	0	0	0	0	0	0	0	0	0	0	0	0	0	0	0	0									756	0	0	0	0	0	0	0	0	0	0	0	0	0	0	0	0	0	0	0
	757	0	0	0	0	0	0	0	0	0	0	0	0	0	0	0	0	0	0	0	0									757	0	0	0	0	0	0	0	0	0	0	0	0	0	0	0	0	0	0	0
	758	0	0	0	0	0	0	0	0	0	0	0	0	0	0	0	0	0	0	0	0									758	0	0	0	0	0	0	0	0	0	0	0	0	0	0	0	0	0	0	0
	759	0	0	0	0	0	0	0	0	0	0	0	0	0	0	0	0	0	0	0	0									759	0	0	0	0	0	0	0	0	0	0	0	0	0	0	0	0	0	0	0
	760	0	0	0	0	0	0	0	0	0	0	0	0	0	0	0	0	0	0	0	0									760	0	0	0	0	0	0	0	0	0	0	0	0	0	0	0	0	0	0	0
	761	0	0	0	0	0	0	0	0	0	0	0	0	0	0	0	0	0	0	0	0									761	0	0	0	0	0	0	0	0	0	0	0	0	0	0	0	0	0	0	0
	762	0	0	0	0	0	0	0	0	0	0	0	0	0	0	0	0	0	0	0	0									762	0	0	0	0	0	0	0	0	0	0	0	0	0	0	0	0	0	0	0
	763	0	0	0	0	0	0	0	0	0	0	0	0	0	0	0	0	0	0	0	0									763	0	0	0	0	0	0	0	0	0	0	0	0	0	0	0	0	0	0	0
	764	0	0	0	0	0	0	0	0	0	0	0	0	0	0	0	0	0	0	0	0									764	0	0	0	0	0	0	0	0	0	0	0	0	0	0	0	0	0	0	0
	765	0	0	0	0	0	0	0	0	0	0	0	0	0	0	0	0	0	0	0	0									765	0	0	0	0	0	0	0	0	0	0	0	0	0	0	0	0	0	0	0
	766	0	0	0	0	0	0	0	0	0	0	0	0	0	0	0	0	0	0	0	0									766	0	0	0	0	0	0	0	0	0	0	0	0	0	0	0	0	0	0	0
	767	0	0	0	0	0	0	0	0	0	0	0	0	0	0	0	0	0	0	0	0									767	0	0	0	0	0	0	0	0	0	0	0	0	0	0	0	0	0	0	0
	768	0	0	0	0	0	0	0	0	0	0	0	0	0	0	0	0	0	0	0	0									768	0	0	0	0	0	0	0	0	0	0	0	0	0	0	0	0	0	0	0
	769	0	0	0	0	0	0	0	0	0	0	0	0	0	0	0	0	0	0	0	0									769	0	0	0	0	0	0	0	0	0	0	0	0	0	0	0	0	0	0	0
	770	0	0	0	0	0	0	0	0	0	0	0	0	0	0	0	0	0	0	0	0									770	0	0	0	0	0	0	0	0	0	0	0	0	0	0	0	0	0	0	0
	771	0	0	0	0	0	0	0	0	0	0	0	0	0	0	0	0	0	0	0	0									771	0	0	0	0	0	0	0	0	0	0	0	0	0	0	0	0	0	0	0
	772	0	0	0	0	0	0	0	0	0	0	0	0	0	0	0	0	0	0	0	0									772	0	0	0	0	0	0	0	0	0	0	0	0	0	0	0	0	0	0	0
	773	0	0	0	0	0	0	0	0	0	0	0	0	0	0	0	0	0	0	0	0									773	0	0	0	0	0	0	0	0	0	0	0	0	0	0	0	0	0	0	0
	774	0	0	0	0	0	0	0	0	0	0	0	0	0	0	0	0	0	0	0	0									774	0	0	0	0	0	0	0	0	0	0	0	0	0	0	0	0	0	0	0
	775	0	0	0	0	0	0	0	0	0	0	0	0	0	0	0	0	0	0	0	0									775	0	0	0	0	0	0	0	0	0	0	0	0	0	0	0	0	0	0	0
	776	0	0	0	0	0	0	0	0	0	0	0	0	0	0	0	0	0	0	0	0									776	0	0	0	0	0	0	0	0	0	0	0	0	0	0	0	0	0	0	0
	777	0	0	0	0	0	0	0	0	0	0	0	0	0	0	0	0	0	0	0	0									777	0	0	0	0	0	0	0	0	0	0	0	0	0	0	0	0	0	0	0
	778	0	0	0	0	0	0	0	0	0	0	0	0	0	0	0	0	0	0	0	0									778	0	0	0	0	0	0	0	0	0	0	0	0	0	0	0	0	0	0	0
	779	0	0	0	0	0	0	0	0	0	0	0	0	0	0	0	0	0	0	0	0									779	0	0	0	0	0	0	0	0	0	0	0	0	0	0	0	0	0	0	0
	780	0	0	0	0	0	0	0	0	0	0	0	0	0	0	0	0	0	0	0	0									780	0	0	0	0	0	0	0	0	0	0	0	0	0	0	0	0	0	0	0
	781	0	0	0	0	0	0	0	0	0	0	0	0	0	0	0	0	0	0	0	0									781	0	0	0	0	0	0	0	0	0	0	0	0	0	0	0	0	0	0	0
	782	0	0	0	0	0	0	0	0	0	0	0	0	0	0	0	0	0	0	0	0									782	0	0	0	0	0	0	0	0	0	0	0	0	0	0	0	0	0	0	0
	783	0	0	0	0	0	0	0	0	0	0	0	0	0	0	0	0	0	0	0	0									783	0	0	0	0	0	0	0	0	0	0	0	0	0	0	0	0	0	0	0
	784	0	0	0	0	0	0	0	0	0	0	0	0	0	0	0	0	0	0	0	0									784	0	0	0	0	0	0	0	0	0	0	0	0	0	0	0	0	0	0	0
	785	0	0	0	0	0	0	0	0	0	0	0	0	0	0	0	0	0	0	0	0									785	0	0	0	0	0	0	0	0	0	0	0	0	0	0	0	0	0	0	0
	786	0	0	0	0	0	0	0	0	0	0	0	0	0	0	0	0	0	0	0	0									786	0	0	0	0	0	0	0	0	0	0	0	0	0	0	0	0	0	0	0
	787	0	0	0	0	0	0	0	0	0	0	0	0	0	0	0	0	0	0	0	0									787	0	0	0	0	0	0	0	0	0	0	0	0	0	0	0	0	0	0	0
	788	0	0	0	0	0	0	0	0	0	0	0	0	0	0	0	0	0	0	0	0									788	0	0	0	0	0	0	0	0	0	0	0	0	0	0	0	0	0	0	0
	789	0	0	0	0	0	0	0	0	0	0	0	0	0	0	0	0	0	0	0	0									789	0	0	0	0	0	0	0	0	0	0	0	0	0	0	0	0	0	0	0
	790	0	0	0	0	0	0	0	0	0	0	0	0	0	0	0	0	0	0	0	0									790	0	0	0	0	0	0	0	0	0	0	0	0	0	0	0	0	0	0	0
	791	0	0	0	0	0	0	0	0	0	0	0	0	0	0	0	0	0	0	0	0									791	0	0	0	0	0	0	0	0	0	0	0	0	0	0	0	0	0	0	0
	792	0	0	0	0	0	0	0	0	0	0	0	0	0	0	0	0	0	0	0	0									792	0	0	0	0	0	0	0	0	0	0	0	0	0	0	0	0	0	0	0
	793	0	0	0	0	0	0	0	0	0	0	0	0	0	0	0	0	0	0	0	0									793	0	0	0	0	0	0	0	0	0	0	0	0	0	0	0	0	0	0	0
	794	0	0	0	0	0	0	0	0	0	0	0	0	0	0	0	0	0	0	0	0									794	0	0	0	0	0	0	0	0	0	0	0	0	0	0	0	0	0	0	0
	795	0	0	0	0	0	0	0	0	0	0	0	0	0	0	0	0	0	0	0	0									795	0	0	0	0	0	0	0	0	0	0	0	0	0	0	0	0	0	0	0
	796	0	0	0	0	0	0	0	0	0	0	0	0	0	0	0	0	0	0	0	0									796	0	0	0	0	0	0	0	0	0	0	0	0	0	0	0	0	0	0	0
	797	0	0	0	0	0	0	0	0	0	0	0	0	0	0	0	0	0	0	0	0									797	0	0	0	0	0	0	0	0	0	0	0	0	0	0	0	0	0	0	0
	798	0	0	0	0	0	0	0	0	0	0	0	0	0	0	0	0	0	0	0	0									798	0	0	0	0	0	0	0	0	0	0	0	0	0	0	0	0	0	0	0
	799	0	0	0	0	0	0	0	0	0	0	0	0	0	0	0	0	0	0	0	0									799	0	0	0	0	0	0	0	0	0	0	0	0	0	0	0	0	0	0	0
	800	0	0	0	0	0	0	0	0	0	0	0	0	0	0	0	0	0	0	0	0									800	0	0	0	0	0	0	0	0	0	0	0	0	0	0	0	0	0	0	0
	801	0	0	0	0	0	0	0	0	0	0	0	0	0	0	0	0	0	0	0	0									801	0	0	0	0	0	0	0	0	0	0	0	0	0	0	0	0	0	0	0
	802	0	0	0	0	0	0	0	0	0	0	0	0	0	0	0	0	0	0	0	0									802	0	0	0	0	0	0	0	0	0	0	0	0	0	0	0	0	0	0	0
	803	0	0	0	0	0	0	0	0	0	0	0	0	0	0	0	0	0	0	0	0									803	0	0	0	0	0	0	0	0	0	0	0	0	0	0	0	0	0	0	0
	804	0	0	0	0	0	0	0	0	0	0	0	0	0	0	0	0	0	0	0	0									804	0	0	0	0	0	0	0	0	0	0	0	0	0	0	0	0	0	0	0
	805	0	0	0	0	0	0	0	0	0	0	0	0	0	0	0	0	0	0	0	0									805	0	0	0	0	0	0	0	0	0	0	0	0	0	0	0	0	0	0	0
	806	0	0	0	0	0	0	0	0	0	0	0	0	0	0	0	0	0	0	0	0									806	0	0	0	0	0	0	0	0	0	0	0	0	0	0	0	0	0	0	0
	807	0	0	0	0	0	0	0	0	0	0	0	0	0	0	0	0	0	0	0	0									807	0	0	0	0	0	0	0	0	0	0	0	0	0	0	0	0	0	0	0
	808	0	0	0	0	0	0	0	0	0	0	0	0	0	0	0	0	0	0	0	0									808	0	0	0	0	0	0	0	0	0	0	0	0	0	0	0	0	0	0	0
	809	0	0	0	0	0	0	0	0	0	0	0	0	0	0	0	0	0	0	0	0									809	0	0	0	0	0	0	0	0	0	0	0	0	0	0	0	0	0	0	0
	810	0	0	0	0	0	0	0	0	0	0	0	0	0	0	0	0	0	0	0	0									810	0	0	0	0	0	0	0	0	0	0	0	0	0	0	0	0	0	0	0
	811	0	0	0	0	0	0	0	0	0	0	0	0	0	0	0	0	0	0	0	0									811	0	0	0	0	0	0	0	0	0	0	0	0	0	0	0	0	0	0	0
	812	0	0	0	0	0	0	0	0	0	0	0	0	0	0	0	0	0	0	0	0									812	0	0	0	0	0	0	0	0	0	0	0	0	0	0	0	0	0	0	0
	813	0	0	0	0	0	0	0	0	0	0	0	0	0	0	0	0	0	0	0	0									813	0	0	0	0	0	0	0	0	0	0	0	0	0	0	0	0	0	0	0
	814	0	0	0	0	0	0	0	0	0	0	0	0	0	0	0	0	0	0	0	0									814	0	0	0	0	0	0	0	0	0	0	0	0	0	0	0	0	0	0	0
	815	0	0	0	0	0	0	0	0	0	0	0	0	0	0	0	0	0	0	0	0									815	0	0	0	0	0	0	0	0	0	0	0	0	0	0	0	0	0	0	0
	816	0	0	0	0	0	0	0	0	0	0	0	0	0	0	0	0	0	0	0	0									816	0	0	0	0	0	0	0	0	0	0	0	0	0	0	0	0	0	0	0
	817	0	0	0	0	0	0	0	0	0	0	0	0	0	0	0	0	0	0	0	0									817	0	0	0	0	0	0	0	0	0	0	0	0	0	0	0	0	0	0	0
	818	0	0	0	0	0	0	0	0	0	0	0	0	0	0	0	0	0	0	0	0									818	0	0	0	0	0	0	0	0	0	0	0	0	0	0	0	0	0	0	0
	819	0	0	0	0	0	0	0	0	0	0	0	0	0	0	0	0	0	0	0	0									819	0	0	0	0	0	0	0	0	0	0	0	0	0	0	0	0	0	0	0
	820	0	0	0	0	0	0	0	0	0	0	0	0	0	0	0	0	0	0	0	0									820	0	0	0	0	0	0	0	0	0	0	0	0	0	0	0	0	0	0	0
	821	0	0	0	0	0	0	0	0	0	0	0	0	0	0	0	0	0	0	0	0									821	0	0	0	0	0	0	0	0	0	0	0	0	0	0	0	0	0	0	0
	822	0	0	0	0	0	0	0	0	0	0	0	0	0	0	0	0	0	0	0	0									822	0	0	0	0	0	0	0	0	0	0	0	0	0	0	0	0	0	0	0
	823	0	0	0	0	0	0	0	0	0	0	0	0	0	0	0	0	0	0	0	0									823	0	0	0	0	0	0	0	0	0	0	0	0	0	0	0	0	0	0	0
	824	0	0	0	0	0	0	0	0	0	0	0	0	0	0	0	0	0	0	0	0									824	0	0	0	0	0	0	0	0	0	0	0	0	0	0	0	0	0	0	0
	825	0	0	0	0	0	0	0	0	0	0	0	0	0	0	0	0	0	0	0	0									825	0	0	0	0	0	0	0	0	0	0	0	0	0	0	0	0	0	0	0
	826	0	0	0	0	0	0	0	0	0	0	0	0	0	0	0	0	0	0	0	0									826	0	0	0	0	0	0	0	0	0	0	0	0	0	0	0	0	0	0	0
	827	0	0	0	0	0	0	0	0	0	0	0	0	0	0	0	0	0	0	0	0									827	0	0	0	0	0	0	0	0	0	0	0	0	0	0	0	0	0	0	0
	828	0	0	0	0	0	0	0	0	0	0	0	0	0	0	0	0	0	0	0	0									828	0	0	0	0	0	0	0	0	0	0	0	0	0	0	0	0	0	0	0
	829	0	0	0	0	0	0	0	0	0	0	0	0	0	0	0	0	0	0	0	0									829	0	0	0	0	0	0	0	0	0	0	0	0	0	0	0	0	0	0	0
	830	0	0	0	0	0	0	0	0	0	0	0	0	0	0	0	0	0	0	0	0									830	0	0	0	0	0	0	0	0	0	0	0	0	0	0	0	0	0	0	0
	831	0	0	0	0	0	0	0	0	0	0	0	0	0	0	0	0	0	0	0	0									831	0	0	0	0	0	0	0	0	0	0	0	0	0	0	0	0	0	0	0
	832	0	0	0	0	0	0	0	0	0	0	0	0	0	0	0	0	0	0	0	0									832	0	0	0	0	0	0	0	0	0	0	0	0	0	0	0	0	0	0	0
	833	0	0	0	0	0	0	0	0	0	0	0	0	0	0	0	0	0	0	0	0									833	0	0	0	0	0	0	0	0	0	0	0	0	0	0	0	0	0	0	0
	834	0	0	0	0	0	0	0	0	0	0	0	0	0	0	0	0	0	0	0	0									834	0	0	0	0	0	0	0	0	0	0	0	0	0	0	0	0	0	0	0
	835	0	0	0	0	0	0	0	0	0	0	0	0	0	0	0	0	0	0	0	0									835	0	0	0	0	0	0	0	0	0	0	0	0	0	0	0	0	0	0	0
	836	0	0	0	0	0	0	0	0	0	0	0	0	0	0	0	0	0	0	0	0									836	0	0	0	0	0	0	0	0	0	0	0	0	0	0	0	0	0	0	0
	837	0	0	0	0	0	0	0	0	0	0	0	0	0	0	0	0	0	0	0	0									837	0	0	0	0	0	0	0	0	0	0	0	0	0	0	0	0	0	0	0
	838	0	0	0	0	0	0	0	0	0	0	0	0	0	0	0	0	0	0	0	0									838	0	0	0	0	0	0	0	0	0	0	0	0	0	0	0	0	0	0	0
	839	0	0	0	0	0	0	0	0	0	0	0	0	0	0	0	0	0	0	0	0									839	0	0	0	0	0	0	0	0	0	0	0	0	0	0	0	0	0	0	0
	840	0	0	0	0	0	0	0	0	0	0	0	0	0	0	0	0	0	0	0	0									840	0	0	0	0	0	0	0	0	0	0	0	0	0	0	0	0	0	0	0
	841	0	0	0	0	0	0	0	0	0	0	0	0	0	0	0	0	0	0	0	0									841	0	0	0	0	0	0	0	0	0	0	0	0	0	0	0	0	0	0	0
	842	0	0	0	0	0	0	0	0	0	0	0	0	0	0	0	0	0	0	0	0									842	0	0	0	0	0	0	0	0	0	0	0	0	0	0	0	0	0	0	0
	843	0	0	0	0	0	0	0	0	0	0	0	0	0	0	0	0	0	0	0	0									843	0	0	0	0	0	0	0	0	0	0	0	0	0	0	0	0	0	0	0
	844	0	0	0	0	0	0	0	0	0	0	0	0	0	0	0	0	0	0	0	0									844	0	0	0	0	0	0	0	0	0	0	0	0	0	0	0	0	0	0	0
	845	0	0	0	0	0	0	0	0	0	0	0	0	0	0	0	0	0	0	0	0									845	0	0	0	0	0	0	0	0	0	0	0	0	0	0	0	0	0	0	0
	846	0	0	0	0	0	0	0	0	0	0	0	0	0	0	0	0	0	0	0	0									846	0	0	0	0	0	0	0	0	0	0	0	0	0	0	0	0	0	0	0
	847	0	0	0	0	0	0	0	0	0	0	0	0	0	0	0	0	0	0	0	0									847	0	0	0	0	0	0	0	0	0	0	0	0	0	0	0	0	0	0	0
	848	0	0	0	0	0	0	0	0	0	0	0	0	0	0	0	0	0	0	0	0									848	0	0	0	0	0	0	0	0	0	0	0	0	0	0	0	0	0	0	0
	849	0	0	0	0	0	0	0	0	0	0	0	0	0	0	0	0	0	0	0	0									849	0	0	0	0	0	0	0	0	0	0	0	0	0	0	0	0	0	0	0
	850	0	0	0	0	0	0	0	0	0	0	0	0	0	0	0	0	0	0	0	0									850	0	0	0	0	0	0	0	0	0	0	0	0	0	0	0	0	0	0	0
	851	0	0	0	0	0	0	0	0	0	0	0	0	0	0	0	0	0	0	0	0									851	0	0	0	0	0	0	0	0	0	0	0	0	0	0	0	0	0	0	0
	852	0	0	0	0	0	0	0	0	0	0	0	0	0	0	0	0	0	0	0	0									852	0	0	0	0	0	0	0	0	0	0	0	0	0	0	0	0	0	0	0
	853	0	0	0	0	0	0	0	0	0	0	0	0	0	0	0	0	0	0	0	0									853	0	0	0	0	0	0	0	0	0	0	0	0	0	0	0	0	0	0	0
	854	0	0	0	0	0	0	0	0	0	0	0	0	0	0	0	0	0	0	0	0									854	0	0	0	0	0	0	0	0	0	0	0	0	0	0	0	0	0	0	0
	855	0	0	0	0	0	0	0	0	0	0	0	0	0	0	0	0	0	0	0	0									855	0	0	0	0	0	0	0	0	0	0	0	0	0	0	0	0	0	0	0
	856	0	0	0	0	0	0	0	0	0	0	0	0	0	0	0	0	0	0	0	0									856	0	0	0	0	0	0	0	0	0	0	0	0	0	0	0	0	0	0	0
	857	0	0	0	0	0	0	0	0	0	0	0	0	0	0	0	0	0	0	0	0									857	0	0	0	0	0	0	0	0	0	0	0	0	0	0	0	0	0	0	0
	858	0	0	0	0	0	0	0	0	0	0	0	0	0	0	0	0	0	0	0	0									858	0	0	0	0	0	0	0	0	0	0	0	0	0	0	0	0	0	0	0
	859	0	0	0	0	0	0	0	0	0	0	0	0	0	0	0	0	0	0	0	0									859	0	0	0	0	0	0	0	0	0	0	0	0	0	0	0	0	0	0	0
	860	0	0	0	0	0	0	0	0	0	0	0	0	0	0	0	0	0	0	0	0									860	0	0	0	0	0	0	0	0	0	0	0	0	0	0	0	0	0	0	0
	861	0	0	0	0	0	0	0	0	0	0	0	0	0	0	0	0	0	0	0	0									861	0	0	0	0	0	0	0	0	0	0	0	0	0	0	0	0	0	0	0
	862	0	0	0	0	0	0	0	0	0	0	0	0	0	0	0	0	0	0	0	0									862	0	0	0	0	0	0	0	0	0	0	0	0	0	0	0	0	0	0	0
	863	0	0	0	0	0	0	0	0	0	0	0	0	0	0	0	0	0	0	0	0									863	0	0	0	0	0	0	0	0	0	0	0	0	0	0	0	0	0	0	0
	864	0	0	0	0	0	0	0	0	0	0	0	0	0	0	0	0	0	0	0	0									864	0	0	0	0	0	0	0	0	0	0	0	0	0	0	0	0	0	0	0
	865	0	0	0	0	0	0	0	0	0	0	0	0	0	0	0	0	0	0	0	0									865	0	0	0	0	0	0	0	0	0	0	0	0	0	0	0	0	0	0	0
	866	0	0	0	0	0	0	0	0	0	0	0	0	0	0	0	0	0	0	0	0									866	0	0	0	0	0	0	0	0	0	0	0	0	0	0	0	0	0	0	0
	867	0	0	0	0	0	0	0	0	0	0	0	0	0	0	0	0	0	0	0	0									867	0	0	0	0	0	0	0	0	0	0	0	0	0	0	0	0	0	0	0
	868	0	0	0	0	0	0	0	0	0	0	0	0	0	0	0	0	0	0	0	0									868	0	0	0	0	0	0	0	0	0	0	0	0	0	0	0	0	0	0	0
	869	0	0	0	0	0	0	0	0	0	0	0	0	0	0	0	0	0	0	0	0									869	0	0	0	0	0	0	0	0	0	0	0	0	0	0	0	0	0	0	0
	870	0	0	0	0	0	0	0	0	0	0	0	0	0	0	0	0	0	0	0	0									870	0	0	0	0	0	0	0	0	0	0	0	0	0	0	0	0	0	0	0
	871	0	0	0	0	0	0	0	0	0	0	0	0	0	0	0	0	0	0	0	0									871	0	0	0	0	0	0	0	0	0	0	0	0	0	0	0	0	0	0	0
	872	0	0	0	0	0	0	0	0	0	0	0	0	0	0	0	0	0	0	0	0									872	0	0	0	0	0	0	0	0	0	0	0	0	0	0	0	0	0	0	0
	873	0	0	0	0	0	0	0	0	0	0	0	0	0	0	0	0	0	0	0	0									873	0	0	0	0	0	0	0	0	0	0	0	0	0	0	0	0	0	0	0
	874	0	0	0	0	0	0	0	0	0	0	0	0	0	0	0	0	0	0	0	0									874	0	0	0	0	0	0	0	0	0	0	0	0	0	0	0	0	0	0	0
	875	0	0	0	0	0	0	0	0	0	0	0	0	0	0	0	0	0	0	0	0									875	0	0	0	0	0	0	0	0	0	0	0	0	0	0	0	0	0	0	0
	876	0	0	0	0	0	0	0	0	0	0	0	0	0	0	0	0	0	0	0	0									876	0	0	0	0	0	0	0	0	0	0	0	0	0	0	0	0	0	0	0
	877	0	0	0	0	0	0	0	0	0	0	0	0	0	0	0	0	0	0	0	0									877	0	0	0	0	0	0	0	0	0	0	0	0	0	0	0	0	0	0	0
	878	0	0	0	0	0	0	0	0	0	0	0	0	0	0	0	0	0	0	0	0									878	0	0	0	0	0	0	0	0	0	0	0	0	0	0	0	0	0	0	0
	879	0	0	0	0	0	0	0	0	0	0	0	0	0	0	0	0	0	0	0	0									879	0	0	0	0	0	0	0	0	0	0	0	0	0	0	0	0	0	0	0
	880	0	0	0	0	0	0	0	0	0	0	0	0	0	0	0	0	0	0	0	0									880	0	0	0	0	0	0	0	0	0	0	0	0	0	0	0	0	0	0	0
	881	0	0	0	0	0	0	0	0	0	0	0	0	0	0	0	0	0	0	0	0									881	0	0	0	0	0	0	0	0	0	0	0	0	0	0	0	0	0	0	0
	882	0	0	0	0	0	0	0	0	0	0	0	0	0	0	0	0	0	0	0	0									882	0	0	0	0	0	0	0	0	0	0	0	0	0	0	0	0	0	0	0
	883	0	0	0	0	0	0	0	0	0	0	0	0	0	0	0	0	0	0	0	0									883	0	0	0	0	0	0	0	0	0	0	0	0	0	0	0	0	0	0	0
	884	0	0	0	0	0	0	0	0	0	0	0	0	0	0	0	0	0	0	0	0									884	0	0	0	0	0	0	0	0	0	0	0	0	0	0	0	0	0	0	0
	885	0	0	0	0	0	0	0	0	0	0	0	0	0	0	0	0	0	0	0	0									885	0	0	0	0	0	0	0	0	0	0	0	0	0	0	0	0	0	0	0
	886	0	0	0	0	0	0	0	0	0	0	0	0	0	0	0	0	0	0	0	0									886	0	0	0	0	0	0	0	0	0	0	0	0	0	0	0	0	0	0	0
	887	0	0	0	0	0	0	0	0	0	0	0	0	0	0	0	0	0	0	0	0									887	0	0	0	0	0	0	0	0	0	0	0	0	0	0	0	0	0	0	0
	888	0	0	0	0	0	0	0	0	0	0	0	0	0	0	0	0	0	0	0	0									888	0	0	0	0	0	0	0	0	0	0	0	0	0	0	0	0	0	0	0
	889	0	0	0	0	0	0	0	0	0	0	0	0	0	0	0	0	0	0	0	0									889	0	0	0	0	0	0	0	0	0	0	0	0	0	0	0	0	0	0	0
	890	0	0	0	0	0	0	0	0	0	0	0	0	0	0	0	0	0	0	0	0									890	0	0	0	0	0	0	0	0	0	0	0	0	0	0	0	0	0	0	0
	891	0	0	0	0	0	0	0	0	0	0	0	0	0	0	0	0	0	0	0	0									891	0	0	0	0	0	0	0	0	0	0	0	0	0	0	0	0	0	0	0
	892	0	0	0	0	0	0	0	0	0	0	0	0	0	0	0	0	0	0	0	0									892	0	0	0	0	0	0	0	0	0	0	0	0	0	0	0	0	0	0	0
	893	0	0	0	0	0	0	0	0	0	0	0	0	0	0	0	0	0	0	0	0									893	0	0	0	0	0	0	0	0	0	0	0	0	0	0	0	0	0	0	0
	894	0	0	0	0	0	0	0	0	0	0	0	0	0	0	0	0	0	0	0	0									894	0	0	0	0	0	0	0	0	0	0	0	0	0	0	0	0	0	0	0
	895	0	0	0	0	0	0	0	0	0	0	0	0	0	0	0	0	0	0	0	0									895	0	0	0	0	0	0	0	0	0	0	0	0	0	0	0	0	0	0	0
	896	0	0	0	0	0	0	0	0	0	0	0	0	0	0	0	0	0	0	0	0									896	0	0	0	0	0	0	0	0	0	0	0	0	0	0	0	0	0	0	0
	897	0	0	0	0	0	0	0	0	0	0	0	0	0	0	0	0	0	0	0	0									897	0	0	0	0	0	0	0	0	0	0	0	0	0	0	0	0	0	0	0
	898	0	0	0	0	0	0	0	0	0	0	0	0	0	0	0	0	0	0	0	0									898	0	0	0	0	0	0	0	0	0	0	0	0	0	0	0	0	0	0	0
	899	0	0	0	0	0	0	0	0	0	0	0	0	0	0	0	0	0	0	0	0									899	0	0	0	0	0	0	0	0	0	0	0	0	0	0	0	0	0	0	0
	900	0	0	0	0	0	0	0	0	0	0	0	0	0	0	0	0	0	0	0	0									900	0	0	0	0	0	0	0	0	0	0	0	0	0	0	0	0	0	0	0
	901	0	0	0	0	0	0	0	0	0	0	0	0	0	0	0	0	0	0	0	0									901	0	0	0	0	0	0	0	0	0	0	0	0	0	0	0	0	0	0	0
	902	0	0	0	0	0	0	0	0	0	0	0	0	0	0	0	0	0	0	0	0									902	0	0	0	0	0	0	0	0	0	0	0	0	0	0	0	0	0	0	0
	903	0	0	0	0	0	0	0	0	0	0	0	0	0	0	0	0	0	0	0	0									903	0	0	0	0	0	0	0	0	0	0	0	0	0	0	0	0	0	0	0
	904	0	0	0	0	0	0	0	0	0	0	0	0	0	0	0	0	0	0	0	0									904	0	0	0	0	0	0	0	0	0	0	0	0	0	0	0	0	0	0	0
	905	0	0	0	0	0	0	0	0	0	0	0	0	0	0	0	0	0	0	0	0									905	0	0	0	0	0	0	0	0	0	0	0	0	0	0	0	0	0	0	0
	906	0	0	0	0	0	0	0	0	0	0	0	0	0	0	0	0	0	0	0	0									906	0	0	0	0	0	0	0	0	0	0	0	0	0	0	0	0	0	0	0
	907	0	0	0	0	0	0	0	0	0	0	0	0	0	0	0	0	0	0	0	0									907	0	0	0	0	0	0	0	0	0	0	0	0	0	0	0	0	0	0	0
	908	0	0	0	0	0	0	0	0	0	0	0	0	0	0	0	0	0	0	0	0									908	0	0	0	0	0	0	0	0	0	0	0	0	0	0	0	0	0	0	0
	909	0	0	0	0	0	0	0	0	0	0	0	0	0	0	0	0	0	0	0	0									909	0	0	0	0	0	0	0	0	0	0	0	0	0	0	0	0	0	0	0
	910	0	0	0	0	0	0	0	0	0	0	0	0	0	0	0	0	0	0	0	0									910	0	0	0	0	0	0	0	0	0	0	0	0	0	0	0	0	0	0	0
	911	0	0	0	0	0	0	0	0	0	0	0	0	0	0	0	0	0	0	0	0									911	0	0	0	0	0	0	0	0	0	0	0	0	0	0	0	0	0	0	0
	912	0	0	0	0	0	0	0	0	0	0	0	0	0	0	0	0	0	0	0	0									912	0	0	0	0	0	0	0	0	0	0	0	0	0	0	0	0	0	0	0
	913	0	0	0	0	0	0	0	0	0	0	0	0	0	0	0	0	0	0	0	0									913	0	0	0	0	0	0	0	0	0	0	0	0	0	0	0	0	0	0	0
	914	0	0	0	0	0	0	0	0	0	0	0	0	0	0	0	0	0	0	0	0									914	0	0	0	0	0	0	0	0	0	0	0	0	0	0	0	0	0	0	0
	915	0	0	0	0	0	0	0	0	0	0	0	0	0	0	0	0	0	0	0	0									915	0	0	0	0	0	0	0	0	0	0	0	0	0	0	0	0	0	0	0
	916	0	0	0	0	0	0	0	0	0	0	0	0	0	0	0	0	0	0	0	0									916	0	0	0	0	0	0	0	0	0	0	0	0	0	0	0	0	0	0	0
	917	0	0	0	0	0	0	0	0	0	0	0	0	0	0	0	0	0	0	0	0									917	0	0	0	0	0	0	0	0	0	0	0	0	0	0	0	0	0	0	0
	918	0	0	0	0	0	0	0	0	0	0	0	0	0	0	0	0	0	0	0	0									918	0	0	0	0	0	0	0	0	0	0	0	0	0	0	0	0	0	0	0
	919	0	0	0	0	0	0	0	0	0	0	0	0	0	0	0	0	0	0	0	0									919	0	0	0	0	0	0	0	0	0	0	0	0	0	0	0	0	0	0	0
	920	0	0	0	0	0	0	0	0	0	0	0	0	0	0	0	0	0	0	0	0									920	0	0	0	0	0	0	0	0	0	0	0	0	0	0	0	0	0	0	0
	921	0	0	0	0	0	0	0	0	0	0	0	0	0	0	0	0	0	0	0	0									921	0	0	0	0	0	0	0	0	0	0	0	0	0	0	0	0	0	0	0
	922	0	0	0	0	0	0	0	0	0	0	0	0	0	0	0	0	0	0	0	0									922	0	0	0	0	0	0	0	0	0	0	0	0	0	0	0	0	0	0	0
	923	0	0	0	0	0	0	0	0	0	0	0	0	0	0	0	0	0	0	0	0									923	0	0	0	0	0	0	0	0	0	0	0	0	0	0	0	0	0	0	0
	924	0	0	0	0	0	0	0	0	0	0	0	0	0	0	0	0	0	0	0	0									924	0	0	0	0	0	0	0	0	0	0	0	0	0	0	0	0	0	0	0
	925	0	0	0	0	0	0	0	0	0	0	0	0	0	0	0	0	0	0	0	0									925	0	0	0	0	0	0	0	0	0	0	0	0	0	0	0	0	0	0	0
	926	0	0	0	0	0	0	0	0	0	0	0	0	0	0	0	0	0	0	0	0									926	0	0	0	0	0	0	0	0	0	0	0	0	0	0	0	0	0	0	0
	927	0	0	0	0	0	0	0	0	0	0	0	0	0	0	0	0	0	0	0	0									927	0	0	0	0	0	0	0	0	0	0	0	0	0	0	0	0	0	0	0
	928	0	0	0	0	0	0	0	0	0	0	0	0	0	0	0	0	0	0	0	0									928	0	0	0	0	0	0	0	0	0	0	0	0	0	0	0	0	0	0	0
	929	0	0	0	0	0	0	0	0	0	0	0	0	0	0	0	0	0	0	0	0									929	0	0	0	0	0	0	0	0	0	0	0	0	0	0	0	0	0	0	0
	930	0	0	0	0	0	0	0	0	0	0	0	0	0	0	0	0	0	0	0	0									930	0	0	0	0	0	0	0	0	0	0	0	0	0	0	0	0	0	0	0
	931	0	0	0	0	0	0	0	0	0	0	0	0	0	0	0	0	0	0	0	0									931	0	0	0	0	0	0	0	0	0	0	0	0	0	0	0	0	0	0	0
	932	0	0	0	0	0	0	0	0	0	0	0	0	0	0	0	0	0	0	0	0									932	0	0	0	0	0	0	0	0	0	0	0	0	0	0	0	0	0	0	0
	933	0	0	0	0	0	0	0	0	0	0	0	0	0	0	0	0	0	0	0	0									933	0	0	0	0	0	0	0	0	0	0	0	0	0	0	0	0	0	0	0
	934	0	0	0	0	0	0	0	0	0	0	0	0	0	0	0	0	0	0	0	0									934	0	0	0	0	0	0	0	0	0	0	0	0	0	0	0	0	0	0	0
	935	0	0	0	0	0	0	0	0	0	0	0	0	0	0	0	0	0	0	0	0									935	0	0	0	0	0	0	0	0	0	0	0	0	0	0	0	0	0	0	0
	936	0	0	0	0	0	0	0	0	0	0	0	0	0	0	0	0	0	0	0	0									936	0	0	0	0	0	0	0	0	0	0	0	0	0	0	0	0	0	0	0
	937	0	0	0	0	0	0	0	0	0	0	0	0	0	0	0	0	0	0	0	0									937	0	0	0	0	0	0	0	0	0	0	0	0	0	0	0	0	0	0	0
	938	0	0	0	0	0	0	0	0	0	0	0	0	0	0	0	0	0	0	0	0									938	0	0	0	0	0	0	0	0	0	0	0	0	0	0	0	0	0	0	0
	939	0	0	0	0	0	0	0	0	0	0	0	0	0	0	0	0	0	0	0	0									939	0	0	0	0	0	0	0	0	0	0	0	0	0	0	0	0	0	0	0
	940	0	0	0	0	0	0	0	0	0	0	0	0	0	0	0	0	0	0	0	0									940	0	0	0	0	0	0	0	0	0	0	0	0	0	0	0	0	0	0	0
	941	0	0	0	0	0	0	0	0	0	0	0	0	0	0	0	0	0	0	0	0									941	0	0	0	0	0	0	0	0	0	0	0	0	0	0	0	0	0	0	0
	942	0	0	0	0	0	0	0	0	0	0	0	0	0	0	0	0	0	0	0	0									942	0	0	0	0	0	0	0	0	0	0	0	0	0	0	0	0	0	0	0
	943	0	0	0	0	0	0	0	0	0	0	0	0	0	0	0	0	0	0	0	0									943	0	0	0	0	0	0	0	0	0	0	0	0	0	0	0	0	0	0	0
	944	0	0	0	0	0	0	0	0	0	0	0	0	0	0	0	0	0	0	0	0									944	0	0	0	0	0	0	0	0	0	0	0	0	0	0	0	0	0	0	0
	945	0	0	0	0	0	0	0	0	0	0	0	0	0	0	0	0	0	0	0	0									945	0	0	0	0	0	0	0	0	0	0	0	0	0	0	0	0	0	0	0
	946	0	0	0	0	0	0	0	0	0	0	0	0	0	0	0	0	0	0	0	0									946	0	0	0	0	0	0	0	0	0	0	0	0	0	0	0	0	0	0	0
	947	0	0	0	0	0	0	0	0	0	0	0	0	0	0	0	0	0	0	0	0									947	0	0	0	0	0	0	0	0	0	0	0	0	0	0	0	0	0	0	0
	948	0	0	0	0	0	0	0	0	0	0	0	0	0	0	0	0	0	0	0	0									948	0	0	0	0	0	0	0	0	0	0	0	0	0	0	0	0	0	0	0
	949	0	0	0	0	0	0	0	0	0	0	0	0	0	0	0	0	0	0	0	0									949	0	0	0	0	0	0	0	0	0	0	0	0	0	0	0	0	0	0	0
	950	0	0	0	0	0	0	0	0	0	0	0	0	0	0	0	0	0	0	0	0									950	0	0	0	0	0	0	0	0	0	0	0	0	0	0	0	0	0	0	0
	951	0	0	0	0	0	0	0	0	0	0	0	0	0	0	0	0	0	0	0	0									951	0	0	0	0	0	0	0	0	0	0	0	0	0	0	0	0	0	0	0
	952	0	0	0	0	0	0	0	0	0	0	0	0	0	0	0	0	0	0	0	0									952	0	0	0	0	0	0	0	0	0	0	0	0	0	0	0	0	0	0	0
	953	0	0	0	0	0	0	0	0	0	0	0	0	0	0	0	0	0	0	0	0									953	0	0	0	0	0	0	0	0	0	0	0	0	0	0	0	0	0	0	0
	954	0	0	0	0	0	0	0	0	0	0	0	0	0	0	0	0	0	0	0	0									954	0	0	0	0	0	0	0	0	0	0	0	0	0	0	0	0	0	0	0
	955	0	0	0	0	0	0	0	0	0	0	0	0	0	0	0	0	0	0	0	0									955	0	0	0	0	0	0	0	0	0	0	0	0	0	0	0	0	0	0	0
	956	0	0	0	0	0	0	0	0	0	0	0	0	0	0	0	0	0	0	0	0									956	0	0	0	0	0	0	0	0	0	0	0	0	0	0	0	0	0	0	0
	957	0	0	0	0	0	0	0	0	0	0	0	0	0	0	0	0	0	0	0	0									957	0	0	0	0	0	0	0	0	0	0	0	0	0	0	0	0	0	0	0
	958	0	0	0	0	0	0	0	0	0	0	0	0	0	0	0	0	0	0	0	0									958	0	0	0	0	0	0	0	0	0	0	0	0	0	0	0	0	0	0	0
	959	0	0	0	0	0	0	0	0	0	0	0	0	0	0	0	0	0	0	0	0									959	0	0	0	0	0	0	0	0	0	0	0	0	0	0	0	0	0	0	0
	960	0	0	0	0	0	0	0	0	0	0	0	0	0	0	0	0	0	0	0	0									960	0	0	0	0	0	0	0	0	0	0	0	0	0	0	0	0	0	0	0
	961	0	0	0	0	0	0	0	0	0	0	0	0	0	0	0	0	0	0	0	0									961	0	0	0	0	0	0	0	0	0	0	0	0	0	0	0	0	0	0	0
	962	0	0	0	0	0	0	0	0	0	0	0	0	0	0	0	0	0	0	0	0									962	0	0	0	0	0	0	0	0	0	0	0	0	0	0	0	0	0	0	0
	963	0	0	0	0	0	0	0	0	0	0	0	0	0	0	0	0	0	0	0	0									963	0	0	0	0	0	0	0	0	0	0	0	0	0	0	0	0	0	0	0
	964	0	0	0	0	0	0	0	0	0	0	0	0	0	0	0	0	0	0	0	0									964	0	0	0	0	0	0	0	0	0	0	0	0	0	0	0	0	0	0	0
	965	0	0	0	0	0	0	0	0	0	0	0	0	0	0	0	0	0	0	0	0									965	0	0	0	0	0	0	0	0	0	0	0	0	0	0	0	0	0	0	0
	966	0	0	0	0	0	0	0	0	0	0	0	0	0	0	0	0	0	0	0	0									966	0	0	0	0	0	0	0	0	0	0	0	0	0	0	0	0	0	0	0
	967	0	0	0	0	0	0	0	0	0	0	0	0	0	0	0	0	0	0	0	0									967	0	0	0	0	0	0	0	0	0	0	0	0	0	0	0	0	0	0	0
	968	0	0	0	0	0	0	0	0	0	0	0	0	0	0	0	0	0	0	0	0									968	0	0	0	0	0	0	0	0	0	0	0	0	0	0	0	0	0	0	0
	969	0	0	0	0	0	0	0	0	0	0	0	0	0	0	0	0	0	0	0	0									969	0	0	0	0	0	0	0	0	0	0	0	0	0	0	0	0	0	0	0
	970	0	0	0	0	0	0	0	0	0	0	0	0	0	0	0	0	0	0	0	0									970	0	0	0	0	0	0	0	0	0	0	0	0	0	0	0	0	0	0	0
	971	0	0	0	0	0	0	0	0	0	0	0	0	0	0	0	0	0	0	0	0									971	0	0	0	0	0	0	0	0	0	0	0	0	0	0	0	0	0	0	0
	972	0	0	0	0	0	0	0	0	0	0	0	0	0	0	0	0	0	0	0	0									972	0	0	0	0	0	0	0	0	0	0	0	0	0	0	0	0	0	0	0
	973	0	0	0	0	0	0	0	0	0	0	0	0	0	0	0	0	0	0	0	0									973	0	0	0	0	0	0	0	0	0	0	0	0	0	0	0	0	0	0	0
	974	0	0	0	0	0	0	0	0	0	0	0	0	0	0	0	0	0	0	0	0									974	0	0	0	0	0	0	0	0	0	0	0	0	0	0	0	0	0	0	0
	975	0	0	0	0	0	0	0	0	0	0	0	0	0	0	0	0	0	0	0	0									975	0	0	0	0	0	0	0	0	0	0	0	0	0	0	0	0	0	0	0
	976	0	0	0	0	0	0	0	0	0	0	0	0	0	0	0	0	0	0	0	0									976	0	0	0	0	0	0	0	0	0	0	0	0	0	0	0	0	0	0	0
	977	0	0	0	0	0	0	0	0	0	0	0	0	0	0	0	0	0	0	0	0									977	0	0	0	0	0	0	0	0	0	0	0	0	0	0	0	0	0	0	0
	978	0	0	0	0	0	0	0	0	0	0	0	0	0	0	0	0	0	0	0	0									978	0	0	0	0	0	0	0	0	0	0	0	0	0	0	0	0	0	0	0
	979	0	0	0	0	0	0	0	0	0	0	0	0	0	0	0	0	0	0	0	0									979	0	0	0	0	0	0	0	0	0	0	0	0	0	0	0	0	0	0	0
	980	0	0	0	0	0	0	0	0	0	0	0	0	0	0	0	0	0	0	0	0									980	0	0	0	0	0	0	0	0	0	0	0	0	0	0	0	0	0	0	0
	981	0	0	0	0	0	0	0	0	0	0	0	0	0	0	0	0	0	0	0	0									981	0	0	0	0	0	0	0	0	0	0	0	0	0	0	0	0	0	0	0
	982	0	0	0	0	0	0	0	0	0	0	0	0	0	0	0	0	0	0	0	0									982	0	0	0	0	0	0	0	0	0	0	0	0	0	0	0	0	0	0	0
	983	0	0	0	0	0	0	0	0	0	0	0	0	0	0	0	0	0	0	0	0									983	0	0	0	0	0	0	0	0	0	0	0	0	0	0	0	0	0	0	0
	984	0	0	0	0	0	0	0	0	0	0	0	0	0	0	0	0	0	0	0	0									984	0	0	0	0	0	0	0	0	0	0	0	0	0	0	0	0	0	0	0
	985	0	0	0	0	0	0	0	0	0	0	0	0	0	0	0	0	0	0	0	0									985	0	0	0	0	0	0	0	0	0	0	0	0	0	0	0	0	0	0	0
	986	0	0	0	0	0	0	0	0	0	0	0	0	0	0	0	0	0	0	0	0									986	0	0	0	0	0	0	0	0	0	0	0	0	0	0	0	0	0	0	0
	987	0	0	0	0	0	0	0	0	0	0	0	0	0	0	0	0	0	0	0	0									987	0	0	0	0	0	0	0	0	0	0	0	0	0	0	0	0	0	0	0
	988	0	0	0	0	0	0	0	0	0	0	0	0	0	0	0	0	0	0	0	0									988	0	0	0	0	0	0	0	0	0	0	0	0	0	0	0	0	0	0	0
	989	0	0	0	0	0	0	0	0	0	0	0	0	0	0	0	0	0	0	0	0									989	0	0	0	0	0	0	0	0	0	0	0	0	0	0	0	0	0	0	0
	990	0	0	0	0	0	0	0	0	0	0	0	0	0	0	0	0	0	0	0	0									990	0	0	0	0	0	0	0	0	0	0	0	0	0	0	0	0	0	0	0
	991	0	0	0	0	0	0	0	0	0	0	0	0	0	0	0	0	0	0	0	0									991	0	0	0	0	0	0	0	0	0	0	0	0	0	0	0	0	0	0	0
	992	0	0	0	0	0	0	0	0	0	0	0	0	0	0	0	0	0	0	0	0									992	0	0	0	0	0	0	0	0	0	0	0	0	0	0	0	0	0	0	0
	993	0	0	0	0	0	0	0	0	0	0	0	0	0	0	0	0	0	0	0	0									993	0	0	0	0	0	0	0	0	0	0	0	0	0	0	0	0	0	0	0
	994	0	0	0	0	0	0	0	0	0	0	0	0	0	0	0	0	0	0	0	0									994	0	0	0	0	0	0	0	0	0	0	0	0	0	0	0	0	0	0	0
	995	0	0	0	0	0	0	0	0	0	0	0	0	0	0	0	0	0	0	0	0									995	0	0	0	0	0	0	0	0	0	0	0	0	0	0	0	0	0	0	0
	996	0	0	0	0	0	0	0	0	0	0	0	0	0	0	0	0	0	0	0	0									996	0	0	0	0	0	0	0	0	0	0	0	0	0	0	0	0	0	0	0
	997	0	0	0	0	0	0	0	0	0	0	0	0	0	0	0	0	0	0	0	0									997	0	0	0	0	0	0	0	0	0	0	0	0	0	0	0	0	0	0	0
	998	0	0	0	0	0	0	0	0	0	0	0	0	0	0	0	0	0	0	0	0									998	0	0	0	0	0	0	0	0	0	0	0	0	0	0	0	0	0	0	0
	999	0	0	0	0	0	0	0	0	0	0	0	0	0	0	0	0	0	0	0	0									999	0	0	0	0	0	0	0	0	0	0	0	0	0	0	0	0	0	0	0
	1000	0	0	0	0	0	0	0	0	0	0	0	0	0	0	0	0	0	0	0	0									1000	0	0	0	0	0	0	0	0	0	0	0	0	0	0	0	0	0	0	0
	1001	0	0	0	0	0	0	0	0	0	0	0	0	0	0	0	0	0	0	0	0									1001	0	0	0	0	0	0	0	0	0	0	0	0	0	0	0	0	0	0	0
	1002	0	0	0	0	0	0	0	0	0	0	0	0	0	0	0	0	0	0	0	0									1002	0	0	0	0	0	0	0	0	0	0	0	0	0	0	0	0	0	0	0
	1003	0	0	0	0	0	0	0	0	0	0	0	0	0	0	0	0	0	0	0	0									1003	0	0	0	0	0	0	0	0	0	0	0	0	0	0	0	0	0	0	0
	1004	0	0	0	0	0	0	0	0	0	0	0	0	0	0	0	0	0	0	0	0									1004	0	0	0	0	0	0	0	0	0	0	0	0	0	0	0	0	0	0	0
	1005	0	0	0	0	0	0	0	0	0	0	0	0	0	0	0	0	0	0	0	0									1005	0	0	0	0	0	0	0	0	0	0	0	0	0	0	0	0	0	0	0
	1006	0	0	0	0	0	0	0	0	0	0	0	0	0	0	0	0	0	0	0	0									1006	0	0	0	0	0	0	0	0	0	0	0	0	0	0	0	0	0	0	0
	1007	0	0	0	0	0	0	0	0	0	0	0	0	0	0	0	0	0	0	0	0									1007	0	0	0	0	0	0	0	0	0	0	0	0	0	0	0	0	0	0	0
	1008	0	0	0	0	0	0	0	0	0	0	0	0	0	0	0	0	0	0	0	0									1008	0	0	0	0	0	0	0	0	0	0	0	0	0	0	0	0	0	0	0
	1009	0	0	0	0	0	0	0	0	0	0	0	0	0	0	0	0	0	0	0	0									1009	0	0	0	0	0	0	0	0	0	0	0	0	0	0	0	0	0	0	0
	1010	0	0	0	0	0	0	0	0	0	0	0	0	0	0	0	0	0	0	0	0									1010	0	0	0	0	0	0	0	0	0	0	0	0	0	0	0	0	0	0	0
	1011	0	0	0	0	0	0	0	0	0	0	0	0	0	0	0	0	0	0	0	0									1011	0	0	0	0	0	0	0	0	0	0	0	0	0	0	0	0	0	0	0
	1012	0	0	0	0	0	0	0	0	0	0	0	0	0	0	0	0	0	0	0	0									1012	0	0	0	0	0	0	0	0	0	0	0	0	0	0	0	0	0	0	0
	1013	0	0	0	0	0	0	0	0	0	0	0	0	0	0	0	0	0	0	0	0									1013	0	0	0	0	0	0	0	0	0	0	0	0	0	0	0	0	0	0	0
	1014	0	0	0	0	0	0	0	0	0	0	0	0	0	0	0	0	0	0	0	0									1014	0	0	0	0	0	0	0	0	0	0	0	0	0	0	0	0	0	0	0
	1015	0	0	0	0	0	0	0	0	0	0	0	0	0	0	0	0	0	0	0	0									1015	0	0	0	0	0	0	0	0	0	0	0	0	0	0	0	0	0	0	0
	1016	0	0	0	0	0	0	0	0	0	0	0	0	0	0	0	0	0	0	0	0									1016	0	0	0	0	0	0	0	0	0	0	0	0	0	0	0	0	0	0	0
	1017	0	0	0	0	0	0	0	0	0	0	0	0	0	0	0	0	0	0	0	0									1017	0	0	0	0	0	0	0	0	0	0	0	0	0	0	0	0	0	0	0
	1018	0	0	0	0	0	0	0	0	0	0	0	0	0	0	0	0	0	0	0	0									1018	0	0	0	0	0	0	0	0	0	0	0	0	0	0	0	0	0	0	0
	1019	0	0	0	0	0	0	0	0	0	0	0	0	0	0	0	0	0	0	0	0									1019	0	0	0	0	0	0	0	0	0	0	0	0	0	0	0	0	0	0	0
	1020	0	0	0	0	0	0	0	0	0	0	0	0	0	0	0	0	0	0	0	0									1020	0	0	0	0	0	0	0	0	0	0	0	0	0	0	0	0	0	0	0
	1021	0	0	0	0	0	0	0	0	0	0	0	0	0	0	0	0	0	0	0	0									1021	0	0	0	0	0	0	0	0	0	0	0	0	0	0	0	0	0	0	0
	1022	0	0	0	0	0	0	0	0	0	0	0	0	0	0	0	0	0	0	0	0									1022	0	0	0	0	0	0	0	0	0	0	0	0	0	0	0	0	0	0	0
	1023	0	0	0	0	0	0	0	0	0	0	0	0	0	0	0	0	0	0	0	0									1023	0	0	0	0	0	0	0	0	0	0	0	0	0	0	0	0	0	0	0
	1024	0	0	0	0	0	0	0	0	0	0	0	0	0	0	0	0	0	0	0	0									1024	0	0	0	0	0	0	0	0	0	0	0	0	0	0	0	0	0	0	0
	1025	0	0	0	0	0	0	0	0	0	0	0	0	0	0	0	0	0	0	0	0									1025	0	0	0	0	0	0	0	0	0	0	0	0	0	0	0	0	0	0	0
	1026	0	0	0	0	0	0	0	0	0	0	0	0	0	0	0	0	0	0	0	0									1026	0	0	0	0	0	0	0	0	0	0	0	0	0	0	0	0	0	0	0
	1027	0	0	0	0	0	0	0	0	0	0	0	0	0	0	0	0	0	0	0	0									1027	0	0	0	0	0	0	0	0	0	0	0	0	0	0	0	0	0	0	0
	1028	0	0	0	0	0	0	0	0	0	0	0	0	0	0	0	0	0	0	0	0									1028	0	0	0	0	0	0	0	0	0	0	0	0	0	0	0	0	0	0	0
	1029	0	0	0	0	0	0	0	0	0	0	0	0	0	0	0	0	0	0	0	0									1029	0	0	0	0	0	0	0	0	0	0	0	0	0	0	0	0	0	0	0
	1030	0	0	0	0	0	0	0	0	0	0	0	0	0	0	0	0	0	0	0	0									1030	0	0	0	0	0	0	0	0	0	0	0	0	0	0	0	0	0	0	0
	1031	0	0	0	0	0	0	0	0	0	0	0	0	0	0	0	0	0	0	0	0									1031	0	0	0	0	0	0	0	0	0	0	0	0	0	0	0	0	0	0	0
	1032	0	0	0	0	0	0	0	0	0	0	0	0	0	0	0	0	0	0	0	0									1032	0	0	0	0	0	0	0	0	0	0	0	0	0	0	0	0	0	0	0
	1033	0	0	0	0	0	0	0	0	0	0	0	0	0	0	0	0	0	0	0	0									1033	0	0	0	0	0	0	0	0	0	0	0	0	0	0	0	0	0	0	0
	1034	0	0	0	0	0	0	0	0	0	0	0	0	0	0	0	0	0	0	0	0									1034	0	0	0	0	0	0	0	0	0	0	0	0	0	0	0	0	0	0	0
	1035	0	0	0	0	0	0	0	0	0	0	0	0	0	0	0	0	0	0	0	0									1035	0	0	0	0	0	0	0	0	0	0	0	0	0	0	0	0	0	0	0
	1036	0	0	0	0	0	0	0	0	0	0	0	0	0	0	0	0	0	0	0	0									1036	0	0	0	0	0	0	0	0	0	0	0	0	0	0	0	0	0	0	0
	1037	0	0	0	0	0	0	0	0	0	0	0	0	0	0	0	0	0	0	0	0									1037	0	0	0	0	0	0	0	0	0	0	0	0	0	0	0	0	0	0	0
	1038	0	0	0	0	0	0	0	0	0	0	0	0	0	0	0	0	0	0	0	0									1038	0	0	0	0	0	0	0	0	0	0	0	0	0	0	0	0	0	0	0
	1039	0	0	0	0	0	0	0	0	0	0	0	0	0	0	0	0	0	0	0	0									1039	0	0	0	0	0	0	0	0	0	0	0	0	0	0	0	0	0	0	0
	1040	0	0	0	0	0	0	0	0	0	0	0	0	0	0	0	0	0	0	0	0									1040	0	0	0	0	0	0	0	0	0	0	0	0	0	0	0	0	0	0	0
	1041	0	0	0	0	0	0	0	0	0	0	0	0	0	0	0	0	0	0	0	0									1041	0	0	0	0	0	0	0	0	0	0	0	0	0	0	0	0	0	0	0
	1042	0	0	0	0	0	0	0	0	0	0	0	0	0	0	0	0	0	0	0	0									1042	0	0	0	0	0	0	0	0	0	0	0	0	0	0	0	0	0	0	0
	1043	0	0	0	0	0	0	0	0	0	0	0	0	0	0	0	0	0	0	0	0									1043	0	0	0	0	0	0	0	0	0	0	0	0	0	0	0	0	0	0	0
	1044	0	0	0	0	0	0	0	0	0	0	0	0	0	0	0	0	0	0	0	0									1044	0	0	0	0	0	0	0	0	0	0	0	0	0	0	0	0	0	0	0
	1045	0	0	0	0	0	0	0	0	0	0	0	0	0	0	0	0	0	0	0	0									1045	0	0	0	0	0	0	0	0	0	0	0	0	0	0	0	0	0	0	0
	1046	0	0	0	0	0	0	0	0	0	0	0	0	0	0	0	0	0	0	0	0									1046	0	0	0	0	0	0	0	0	0	0	0	0	0	0	0	0	0	0	0
	1047	0	0	0	0	0	0	0	0	0	0	0	0	0	0	0	0	0	0	0	0									1047	0	0	0	0	0	0	0	0	0	0	0	0	0	0	0	0	0	0	0
	1048	0	0	0	0	0	0	0	0	0	0	0	0	0	0	0	0	0	0	0	0									1048	0	0	0	0	0	0	0	0	0	0	0	0	0	0	0	0	0	0	0
	1049	0	0	0	0	0	0	0	0	0	0	0	0	0	0	0	0	0	0	0	0									1049	0	0	0	0	0	0	0	0	0	0	0	0	0	0	0	0	0	0	0
	1050	0	0	0	0	0	0	0	0	0	0	0	0	0	0	0	0	0	0	0	0									1050	0	0	0	0	0	0	0	0	0	0	0	0	0	0	0	0	0	0	0
	1051	0	0	0	0	0	0	0	0	0	0	0	0	0	0	0	0	0	0	0	0									1051	0	0	0	0	0	0	0	0	0	0	0	0	0	0	0	0	0	0	0
	1052	0	0	0	0	0	0	0	0	0	0	0	0	0	0	0	0	0	0	0	0									1052	0	0	0	0	0	0	0	0	0	0	0	0	0	0	0	0	0	0	0
	1053	0	0	0	0	0	0	0	0	0	0	0	0	0	0	0	0	0	0	0	0									1053	0	0	0	0	0	0	0	0	0	0	0	0	0	0	0	0	0	0	0
	1054	0	0	0	0	0	0	0	0	0	0	0	0	0	0	0	0	0	0	0	0									1054	0	0	0	0	0	0	0	0	0	0	0	0	0	0	0	0	0	0	0
	1055	0	0	0	0	0	0	0	0	0	0	0	0	0	0	0	0	0	0	0	0									1055	0	0	0	0	0	0	0	0	0	0	0	0	0	0	0	0	0	0	0
	1056	0	0	0	0	0	0	0	0	0	0	0	0	0	0	0	0	0	0	0	0									1056	0	0	0	0	0	0	0	0	0	0	0	0	0	0	0	0	0	0	0
	1057	0	0	0	0	0	0	0	0	0	0	0	0	0	0	0	0	0	0	0	0									1057	0	0	0	0	0	0	0	0	0	0	0	0	0	0	0	0	0	0	0
	1058	0	0	0	0	0	0	0	0	0	0	0	0	0	0	0	0	0	0	0	0									1058	0	0	0	0	0	0	0	0	0	0	0	0	0	0	0	0	0	0	0
	1059	0	0	0	0	0	0	0	0	0	0	0	0	0	0	0	0	0	0	0	0									1059	0	0	0	0	0	0	0	0	0	0	0	0	0	0	0	0	0	0	0
	1060	0	0	0	0	0	0	0	0	0	0	0	0	0	0	0	0	0	0	0	0									1060	0	0	0	0	0	0	0	0	0	0	0	0	0	0	0	0	0	0	0
	1061	0	0	0	0	0	0	0	0	0	0	0	0	0	0	0	0	0	0	0	0									1061	0	0	0	0	0	0	0	0	0	0	0	0	0	0	0	0	0	0	0
	1062	0	0	0	0	0	0	0	0	0	0	0	0	0	0	0	0	0	0	0	0									1062	0	0	0	0	0	0	0	0	0	0	0	0	0	0	0	0	0	0	0
	1063	0	0	0	0	0	0	0	0	0	0	0	0	0	0	0	0	0	0	0	0									1063	0	0	0	0	0	0	0	0	0	0	0	0	0	0	0	0	0	0	0
	1064	0	0	0	0	0	0	0	0	0	0	0	0	0	0	0	0	0	0	0	0									1064	0	0	0	0	0	0	0	0	0	0	0	0	0	0	0	0	0	0	0
	1065	0	0	0	0	0	0	0	0	0	0	0	0	0	0	0	0	0	0	0	0									1065	0	0	0	0	0	0	0	0	0	0	0	0	0	0	0	0	0	0	0
	1066	0	0	0	0	0	0	0	0	0	0	0	0	0	0	0	0	0	0	0	0									1066	0	0	0	0	0	0	0	0	0	0	0	0	0	0	0	0	0	0	0
	1067	0	0	0	0	0	0	0	0	0	0	0	0	0	0	0	0	0	0	0	0									1067	0	0	0	0	0	0	0	0	0	0	0	0	0	0	0	0	0	0	0
	1068	0	0	0	0	0	0	0	0	0	0	0	0	0	0	0	0	0	0	0	0									1068	0	0	0	0	0	0	0	0	0	0	0	0	0	0	0	0	0	0	0
	1069	0	0	0	0	0	0	0	0	0	0	0	0	0	0	0	0	0	0	0	0									1069	0	0	0	0	0	0	0	0	0	0	0	0	0	0	0	0	0	0	0
	1070	0	0	0	0	0	0	0	0	0	0	0	0	0	0	0	0	0	0	0	0
	1071	0	0	0	0	0	0	0	0	0	0	0	0	0	0	0	0	0	0	0	0
	1072	0	0	0	0	0	0	0	0	0	0	0	0	0	0	0	0	0	0	0	0
	1073	0	0	0	0	0	0	0	0	0	0	0	0	0	0	0	0	0	0	0	0
	1074	0	0	0	0	0	0	0	0	0	0	0	0	0	0	0	0	0	0	0	0
	1075	0	0	0	0	0	0	0	0	0	0	0	0	0	0	0	0	0	0	0	0
	1076	0	0	0	0	0	0	0	0	0	0	0	0	0	0	0	0	0	0	0	0
	1077	0	0	0	0	0	0	0	0	0	0	0	0	0	0	0	0	0	0	0	0
	1078	0	0	0	0	0	0	0	0	0	0	0	0	0	0	0	0	0	0	0	0
	1079	0	0	0	0	0	0	0	0	0	0	0	0	0	0	0	0	0	0	0	0
	1080	0	0	0	0	0	0	0	0	0	0	0	0	0	0	0	0	0	0	0	0
	1081	0	0	0	0	0	0	0	0	0	0	0	0	0	0	0	0	0	0	0	0
	1082	0	0	0	0	0	0	0	0	0	0	0	0	0	0	0	0	0	0	0	0
	1083	0	0	0	0	0	0	0	0	0	0	0	0	0	0	0	0	0	0	0	0
	1084	0	0	0	0	0	0	0	0	0	0	0	0	0	0	0	0	0	0	0	0
	1085	0	0	0	0	0	0	0	0	0	0	0	0	0	0	0	0	0	0	0	0
	1086	0	0	0	0	0	0	0	0	0	0	0	0	0	0	0	0	0	0	0	0
	1087	0	0	0	0	0	0	0	0	0	0	0	0	0	0	0	0	0	0	0	0
	1088	0	0	0	0	0	0	0	0	0	0	0	0	0	0	0	0	0	0	0	0
	1089	0	0	0	0	0	0	0	0	0	0	0	0	0	0	0	0	0	0	0	0
	1090	0	0	0	0	0	0	0	0	0	0	0	0	0	0	0	0	0	0	0	0
	1091	0	0	0	0	0	0	0	0	0	0	0	0	0	0	0	0	0	0	0	0
	1092	0	0	0	0	0	0	0	0	0	0	0	0	0	0	0	0	0	0	0	0
	1093	0	0	0	0	0	0	0	0	0	0	0	0	0	0	0	0	0	0	0	0
	1094	0	0	0	0	0	0	0	0	0	0	0	0	0	0	0	0	0	0	0	0
	1095	0	0	0	0	0	0	0	0	0	0	0	0	0	0	0	0	0	0	0	0
	1096	0	0	0	0	0	0	0	0	0	0	0	0	0	0	0	0	0	0	0	0
	1097	0	0	0	0	0	0	0	0	0	0	0	0	0	0	0	0	0	0	0	0
	1098	0	0	0	0	0	0	0	0	0	0	0	0	0	0	0	0	0	0	0	0
	1099	0	0	0	0	0	0	0	0	0	0	0	0	0	0	0	0	0	0	0	0
	1100	0	0	0	0	0	0	0	0	0	0	0	0	0	0	0	0	0	0	0	0
	1101	0	0	0	0	0	0	0	0	0	0	0	0	0	0	0	0	0	0	0	0
	1102	0	0	0	0	0	0	0	0	0	0	0	0	0	0	0	0	0	0	0	0
	1103	0	0	0	0	0	0	0	0	0	0	0	0	0	0	0	0	0	0	0	0
	1104	0	0	0	0	0	0	0	0	0	0	0	0	0	0	0	0	0	0	0	0
	1105	0	0	0	0	0	0	0	0	0	0	0	0	0	0	0	0	0	0	0	0
	1106	0	0	0	0	0	0	0	0	0	0	0	0	0	0	0	0	0	0	0	0
	1107	0	0	0	0	0	0	0	0	0	0	0	0	0	0	0	0	0	0	0	0
	1108	0	0	0	0	0	0	0	0	0	0	0	0	0	0	0	0	0	0	0	0
	1109	0	0	0	0	0	0	0	0	0	0	0	0	0	0	0	0	0	0	0	0
	1110	0	0	0	0	0	0	0	0	0	0	0	0	0	0	0	0	0	0	0	0
	1111	0	0	0	0	0	0	0	0	0	0	0	0	0	0	0	0	0	0	0	0
	1112	0	0	0	0	0	0	0	0	0	0	0	0	0	0	0	0	0	0	0	0
	1113	0	0	0	0	0	0	0	0	0	0	0	0	0	0	0	0	0	0	0	0
	1114	0	0	0	0	0	0	0	0	0	0	0	0	0	0	0	0	0	0	0	0
	1115	0	0	0	0	0	0	0	0	0	0	0	0	0	0	0	0	0	0	0	0
	1116	0	0	0	0	0	0	0	0	0	0	0	0	0	0	0	0	0	0	0	0
	1117	0	0	0	0	0	0	0	0	0	0	0	0	0	0	0	0	0	0	0	0
	1118	0	0	0	0	0	0	0	0	0	0	0	0	0	0	0	0	0	0	0	0
	1119	0	0	0	0	0	0	0	0	0	0	0	0	0	0	0	0	0	0	0	0
	1120	0	0	0	0	0	0	0	0	0	0	0	0	0	0	0	0	0	0	0	0
	1121	0	0	0	0	0	0	0	0	0	0	0	0	0	0	0	0	0	0	0	0
	1122	0	0	0	0	0	0	0	0	0	0	0	0	0	0	0	0	0	0	0	0
	1123	0	0	0	0	0	0	0	0	0	0	0	0	0	0	0	0	0	0	0	0
	1124	0	0	0	0	0	0	0	0	0	0	0	0	0	0	0	0	0	0	0	0
	1125	0	0	0	0	0	0	0	0	0	0	0	0	0	0	0	0	0	0	0	0
	1126	0	0	0	0	0	0	0	0	0	0	0	0	0	0	0	0	0	0	0	0
	1127	0	0	0	0	0	0	0	0	0	0	0	0	0	0	0	0	0	0	0	0
	1128	0	0	0	0	0	0	0	0	0	0	0	0	0	0	0	0	0	0	0	0
	1129	0	0	0	0	0	0	0	0	0	0	0	0	0	0	0	0	0	0	0	0
	1130	0	0	0	0	0	0	0	0	0	0	0	0	0	0	0	0	0	0	0	0
	1131	0	0	0	0	0	0	0	0	0	0	0	0	0	0	0	0	0	0	0	0
	1132	0	0	0	0	0	0	0	0	0	0	0	0	0	0	0	0	0	0	0	0
	1133	0	0	0	0	0	0	0	0	0	0	0	0	0	0	0	0	0	0	0	0
	1134	0	0	0	0	0	0	0	0	0	0	0	0	0	0	0	0	0	0	0	0
	1135	0	0	0	0	0	0	0	0	0	0	0	0	0	0	0	0	0	0	0	0
	1136	0	0	0	0	0	0	0	0	0	0	0	0	0	0	0	0	0	0	0	0
	1137	0	0	0	0	0	0	0	0	0	0	0	0	0	0	0	0	0	0	0	0
	1138	0	0	0	0	0	0	0	0	0	0	0	0	0	0	0	0	0	0	0	0
	1139	0	0	0	0	0	0	0	0	0	0	0	0	0	0	0	0	0	0	0	0
	1140	0	0	0	0	0	0	0	0	0	0	0	0	0	0	0	0	0	0	0	0
	1141	0	0	0	0	0	0	0	0	0	0	0	0	0	0	0	0	0	0	0	0
	1142	0	0	0	0	0	0	0	0	0	0	0	0	0	0	0	0	0	0	0	0
	1143	0	0	0	0	0	0	0	0	0	0	0	0	0	0	0	0	0	0	0	0
	1144	0	0	0	0	0	0	0	0	0	0	0	0	0	0	0	0	0	0	0	0
	1145	0	0	0	0	0	0	0	0	0	0	0	0	0	0	0	0	0	0	0	0
	1146	0	0	0	0	0	0	0	0	0	0	0	0	0	0	0	0	0	0	0	0
	1147	0	0	0	0	0	0	0	0	0	0	0	0	0	0	0	0	0	0	0	0
	1148	0	0	0	0	0	0	0	0	0	0	0	0	0	0	0	0	0	0	0	0
	1149	0	0	0	0	0	0	0	0	0	0	0	0	0	0	0	0	0	0	0	0
	1150	0	0	0	0	0	0	0	0	0	0	0	0	0	0	0	0	0	0	0	0
	1151	0	0	0	0	0	0	0	0	0	0	0	0	0	0	0	0	0	0	0	0
	1152	0	0	0	0	0	0	0	0	0	0	0	0	0	0	0	0	0	0	0	0
	1153	0	0	0	0	0	0	0	0	0	0	0	0	0	0	0	0	0	0	0	0
	1154	0	0	0	0	0	0	0	0	0	0	0	0	0	0	0	0	0	0	0	0
	1155	0	0	0	0	0	0	0	0	0	0	0	0	0	0	0	0	0	0	0	0
	1156	0	0	0	0	0	0	0	0	0	0	0	0	0	0	0	0	0	0	0	0
	1157	0	0	0	0	0	0	0	0	0	0	0	0	0	0	0	0	0	0	0	0
	1158	0	0	0	0	0	0	0	0	0	0	0	0	0	0	0	0	0	0	0	0
	1159	0	0	0	0	0	0	0	0	0	0	0	0	0	0	0	0	0	0	0	0
	1160	0	0	0	0	0	0	0	0	0	0	0	0	0	0	0	0	0	0	0	0
	1161	0	0	0	0	0	0	0	0	0	0	0	0	0	0	0	0	0	0	0	0
	1162	0	0	0	0	0	0	0	0	0	0	0	0	0	0	0	0	0	0	0	0
	1163	0	0	0	0	0	0	0	0	0	0	0	0	0	0	0	0	0	0	0	0
	1164	0	0	0	0	0	0	0	0	0	0	0	0	0	0	0	0	0	0	0	0
	1165	0	0	0	0	0	0	0	0	0	0	0	0	0	0	0	0	0	0	0	0
	1166	0	0	0	0	0	0	0	0	0	0	0	0	0	0	0	0	0	0	0	0
	1167	0	0	0	0	0	0	0	0	0	0	0	0	0	0	0	0	0	0	0	0
	1168	0	0	0	0	0	0	0	0	0	0	0	0	0	0	0	0	0	0	0	0
	1169	0	0	0	0	0	0	0	0	0	0	0	0	0	0	0	0	0	0	0	0
	1170	0	0	0	0	0	0	0	0	0	0	0	0	0	0	0	0	0	0	0	0
	1171	0	0	0	0	0	0	0	0	0	0	0	0	0	0	0	0	0	0	0	0
	1172	0	0	0	0	0	0	0	0	0	0	0	0	0	0	0	0	0	0	0	0
	1173	0	0	0	0	0	0	0	0	0	0	0	0	0	0	0	0	0	0	0	0
	1174	0	0	0	0	0	0	0	0	0	0	0	0	0	0	0	0	0	0	0	0
	1175	0	0	0	0	0	0	0	0	0	0	0	0	0	0	0	0	0	0	0	0
	1176	0	0	0	0	0	0	0	0	0	0	0	0	0	0	0	0	0	0	0	0
	1177	0	0	0	0	0	0	0	0	0	0	0	0	0	0	0	0	0	0	0	0
	1178	0	0	0	0	0	0	0	0	0	0	0	0	0	0	0	0	0	0	0	0
	1179	0	0	0	0	0	0	0	0	0	0	0	0	0	0	0	0	0	0	0	0
	1180	0	0	0	0	0	0	0	0	0	0	0	0	0	0	0	0	0	0	0	0
	1181	0	0	0	0	0	0	0	0	0	0	0	0	0	0	0	0	0	0	0	0
	1182	0	0	0	0	0	0	0	0	0	0	0	0	0	0	0	0	0	0	0	0
	1183	0	0	0	0	0	0	0	0	0	0	0	0	0	0	0	0	0	0	0	0
	1184	0	0	0	0	0	0	0	0	0	0	0	0	0	0	0	0	0	0	0	0
	1185	0	0	0	0	0	0	0	0	0	0	0	0	0	0	0	0	0	0	0	0
	1186	0	0	0	0	0	0	0	0	0	0	0	0	0	0	0	0	0	0	0	0
	1187	0	0	0	0	0	0	0	0	0	0	0	0	0	0	0	0	0	0	0	0
	1188	0	0	0	0	0	0	0	0	0	0	0	0	0	0	0	0	0	0	0	0
	1189	0	0	0	0	0	0	0	0	0	0	0	0	0	0	0	0	0	0	0	0
	1190	0	0	0	0	0	0	0	0	0	0	0	0	0	0	0	0	0	0	0	0
	1191	0	0	0	0	0	0	0	0	0	0	0	0	0	0	0	0	0	0	0	0
	1192	0	0	0	0	0	0	0	0	0	0	0	0	0	0	0	0	0	0	0	0
	1193	0	0	0	0	0	0	0	0	0	0	0	0	0	0	0	0	0	0	0	0
	1194	0	0	0	0	0	0	0	0	0	0	0	0	0	0	0	0	0	0	0	0
	1195	0	0	0	0	0	0	0	0	0	0	0	0	0	0	0	0	0	0	0	0
	1196	0	0	0	0	0	0	0	0	0	0	0	0	0	0	0	0	0	0	0	0
	1197	0	0	0	0	0	0	0	0	0	0	0	0	0	0	0	0	0	0	0	0
	1198	0	0	0	0	0	0	0	0	0	0	0	0	0	0	0	0	0	0	0	0
	1199	0	0	0	0	0	0	0	0	0	0	0	0	0	0	0	0	0	0	0	0
	1200	0	0	0	0	0	0	0	0	0	0	0	0	0	0	0	0	0	0	0	0
	1201	0	0	0	0	0	0	0	0	0	0	0	0	0	0	0	0	0	0	0	0
	1202	0	0	0	0	0	0	0	0	0	0	0	0	0	0	0	0	0	0	0	0
	1203	0	0	0	0	0	0	0	0	0	0	0	0	0	0	0	0	0	0	0	0
	1204	0	0	0	0	0	0	0	0	0	0	0	0	0	0	0	0	0	0	0	0
	1205	0	0	0	0	0	0	0	0	0	0	0	0	0	0	0	0	0	0	0	0
	1206	0	0	0	0	0	0	0	0	0	0	0	0	0	0	0	0	0	0	0	0
	1207	0	0	0	0	0	0	0	0	0	0	0	0	0	0	0	0	0	0	0	0
	1208	0	0	0	0	0	0	0	0	0	0	0	0	0	0	0	0	0	0	0	0
	1209	0	0	0	0	0	0	0	0	0	0	0	0	0	0	0	0	0	0	0	0
	1210	0	0	0	0	0	0	0	0	0	0	0	0	0	0	0	0	0	0	0	0
	1211	0	0	0	0	0	0	0	0	0	0	0	0	0	0	0	0	0	0	0	0
	1212	0	0	0	0	0	0	0	0	0	0	0	0	0	0	0	0	0	0	0	0
	1213	0	0	0	0	0	0	0	0	0	0	0	0	0	0	0	0	0	0	0	0										0	0	0	0	0	0	0	0	0	0	0	0	0	0	0	0	0	0	0
	1214	0	0	0	0	0	0	0	0	0	0	0	0	0	0	0	0	0	0	0	0										0	0	0	0	0	0	0	0	0	0	0	0	0	0	0	0	0	0	0
	1215	0	0	0	0	0	0	0	0	0	0	0	0	0	0	0	0	0	0	0	0										0	0	0	0	0	0	0	0	0	0	0	0	0	0	0	0	0	0	0
	1216	0	0	0	0	0	0	0	0	0	0	0	0	0	0	0	0	0	0	0	0										0	0	0	0	0	0	0	0	0	0	0	0	0	0	0	0	0	0	0
	SKEWIZATION VALUE	1000000	1000000	1000000	1000000	1000000	1000000	1000000	1000000	1000000	1000000	1000000	1000000	1000000	1000000	1000000	1000000	1000000	1000000	1000000	1000000										#VALUE!	#VALUE!	#VALUE!	#VALUE!	#VALUE!	#VALUE!	#VALUE!	#VALUE!	#VALUE!	#VALUE!	#VALUE!	#VALUE!	#VALUE!	#VALUE!	#VALUE!	#VALUE!	#VALUE!	#VALUE!	#VALUE!
SUM	608.5	1001834	1001834	1001834	1001834	1001834	1001834	1001834	1001834	1001834	1001834	1001834	1001834	1001834	1001834	1001834	1001834	1001834	1001834	1001834	1001834									571915	1038514	2038514	3038514	4038514	5038514	6038514	7038514	8038514	9038514	10038514	11038514	12038514	13038514	14038514	15038514	16038514	17038514	18038514	19038514
CN X SUM OF ELEM.		21038514	21038514	21038514	21038514	21038514	21038514	21038514	21038514	21038514	21038514	21038514	21038514	21038514	21038514	21038514	21038514	21038514	21038514	21038514	21038514
		7	8	9	10	11	12	13	14	15	16	17	18	19	20	21	22	23	24	25	26
	SC	20.2583	10.3205	6.92395	5.20947	4.17554	3.48405	2.98906	2.61721	2.32765	2.09578	1.90592	1.7476	1.61357	1.49863	1.39898	1.31175	1.23476	1.16631	1.10505	1.0499
[truncated: 3 more columns]

## Sheet: Isometric Optinalysis (B) 
	OPTINALYSIS: SEQUENCE ANALYSIS THROUGH A LOOKING-GLASS
	CN = Central node; Kc = Kabirian coefficient of similarity; PSim. = Probability level of similarity; PDsim. = Probability level of dissimilarity																NUM. = Numeration; DEN. = Denumeration
				For Kc >1		For Kc <1											For Kc >1			For Kc <1
Skewization value	RESULTS	CN	Kc	PSim.	PDsim.	PSim.	PDsim.										NUM	DEN		NUM	DEN
1000000	M1	21	0.512653	-3.21908	4.21908	-0.310648	1.31065		1	0.512653	1	-3.21908	1	-0.310648			1.48735	-0.462041		0.462041	-1.48735
	M2	21	0.525457	-3.48074	4.48074	-0.287295	1.2873		2	0.525457	2	-3.48074	2	-0.287295			1.47454	-0.423629		0.423629	-1.47454
	M3	21	0.538917	-3.81236	4.81236	-0.262305	1.2623		3	0.538917	3	-3.81236	3	-0.262305			1.46108	-0.383249		0.383249	-1.46108
	M4	21	0.553085	-4.24631	5.24631	-0.235498	1.2355		4	0.553085	4	-4.24631	4	-0.235498			1.44692	-0.340746		0.340746	-1.44692
	M5	21	0.568017	-4.83862	5.83862	-0.20667	1.20667		5	0.568017	5	-4.83862	5	-0.20667			1.43198	-0.295948		0.295948	-1.43198
	M6	21	0.583779	-5.69532	6.69532	-0.175583	1.17558		6	0.583779	6	-5.69532	6	-0.175583			1.41622	-0.248664		0.248664	-1.41622
	M7	21	0.60044	-7.04426	8.04426	-0.14196	1.14196		7	0.60044	7	-7.04426	7	-0.14196			1.39956	-0.198681		0.198681	-1.39956
	M8	21	0.61808	-9.48073	10.4807	-0.105477	1.10548		8	0.61808	8	-9.48073	8	-0.105477			1.38192	-0.145761		0.145761	-1.38192
	M9	21	0.636788	-15.2081	16.2081	-0.0657545	1.06575		9	0.636788	9	-15.2081	9	-0.0657545			1.36321	-0.0896374		0.0896374	-1.36321
	M10	21	0.656663	-44.7625	45.7625	-0.0223401	1.02234		10	0.656663	10	-44.7625	10	-0.0223401			1.34334	-0.0300103		0.0300103	-1.34334
	M11	21	0.67782	39.5166	-38.5166	0.0253058	0.974694		11	0.67782	11	39.5166	11	0.0253058			1.32218	0.0334589		-0.0334589	-1.32218
	M12	21	0.700385	12.8479	-11.8479	0.0778338	0.922166		12	0.700385	12	12.8479	12	0.0778338			1.29962	0.101154		-0.101154	-1.29962
	M13	21	0.724504	7.35108	-6.35108	0.136034	0.863966		13	0.724504	13	7.35108	13	0.136034			1.2755	0.173511		-0.173511	-1.2755
	M14	21	0.750343	4.97811	-3.97811	0.200879	0.799121		14	0.750343	14	4.97811	14	0.200879			1.24966	0.25103		-0.25103	-1.24966
	M15	21	0.778094	3.6553	-2.6553	0.273575	0.726425		15	0.778094	15	3.6553	15	0.273575			1.22191	0.334283		-0.334283	-1.22191
	M16	21	0.807977	2.81184	-1.81184	0.355639	0.644361		16	0.807977	16	2.81184	16	0.355639			1.19202	0.42393		-0.42393	-1.19202
	M17	21	0.840246	2.22713	-1.22713	0.449008	0.550992		17	0.840246	17	2.22713	17	0.449008			1.15975	0.520738		-0.520738	-1.15975
	M18	21	0.8752	1.79795	-0.797951	0.556189	0.443811		18	0.8752	18	1.79795	18	0.556189			1.1248	0.625601		-0.625601	-1.1248
	M19	21	0.913189	1.46952	-0.469525	0.680492	0.319508		19	0.913189	19	1.46952	19	0.680492			1.08681	0.739567		-0.739567	-1.08681
	M20	21	0.954625	1.2101	-0.2101	0.826378	0.173622		20	0.954625	20	1.2101	20	0.826378			1.04538	0.863875		-0.863875	-1.04538
	SEQUENCES	INPUT SEQUENCE																												SEQUENCES	COMPUTATION AND CALCULATIONS
	QUANTITATIVE SCALE	M1	M2	M3	M4	M5	M6	M7	M8	M9	M10	M11	M12	M13	M14	M15	M16	M17	M18	M19	M20									QUANTITATIVE SCALE	M1	M2	M3	M4	M5	M6	M7	M8	M9	M10	M11	M12	X	X	X	X	X	X	X
	41	25	25	25	25	25	25	25	25	25	25	25	25	25	25	25	25	25	25	25	25									41	41001025	1025	1025	1025	1025	1025	1025	1025	1025	1025	1025	1025	1025	1025	1025	1025	1025	1025	1025
	40	28	28	28	28	28	28	28	28	28	28	28	28	28	28	28	28	28	28	28	28									40	1120	40001120	1120	1120	1120	1120	1120	1120	1120	1120	1120	1120	1120	1120	1120	1120	1120	1120	1120
	39	15	15	15	15	15	15	15	15	15	15	15	15	15	15	15	15	15	15	15	15									39	585	585	39000585	585	585	585	585	585	585	585	585	585	585	585	585	585	585	585	585
	38	5	5	5	5	5	5	5	5	5	5	5	5	5	5	5	5	5	5	5	5									38	190	190	190	38000190	190	190	190	190	190	190	190	190	190	190	190	190	190	190	190
	37	55	55	55	55	55	55	55	55	55	55	55	55	55	55	55	55	55	55	55	55									37	2035	2035	2035	2035	37002035	2035	2035	2035	2035	2035	2035	2035	2035	2035	2035	2035	2035	2035	2035
	36	10	10	10	10	10	10	10	10	10	10	10	10	10	10	10	10	10	10	10	10									36	360	360	360	360	360	36000360	360	360	360	360	360	360	360	360	360	360	360	360	360
	35	33	33	33	33	33	33	33	33	33	33	33	33	33	33	33	33	33	33	33	33									35	1155	1155	1155	1155	1155	1155	35001155	1155	1155	1155	1155	1155	1155	1155	1155	1155	1155	1155	1155
	34	12	12	12	12	12	12	12	12	12	12	12	12	12	12	12	12	12	12	12	12									34	408	408	408	408	408	408	408	34000408	408	408	408	408	408	408	408	408	408	408	408
	33	70	70	70	70	70	70	70	70	70	70	70	70	70	70	70	70	70	70	70	70									33	2310	2310	2310	2310	2310	2310	2310	2310	33002310	2310	2310	2310	2310	2310	2310	2310	2310	2310	2310
	32	90	90	90	90	90	90	90	90	90	90	90	90	90	90	90	90	90	90	90	90									32	2880	2880	2880	2880	2880	2880	2880	2880	2880	32002880	2880	2880	2880	2880	2880	2880	2880	2880	2880
	31	45	45	45	45	45	45	45	45	45	45	45	45	45	45	45	45	45	45	45	45									31	1395	1395	1395	1395	1395	1395	1395	1395	1395	1395	31001395	1395	1395	1395	1395	1395	1395	1395	1395
	30	64	64	64	64	64	64	64	64	64	64	64	64	64	64	64	64	64	64	64	64									30	1920	1920	1920	1920	1920	1920	1920	1920	1920	1920	1920	30001920	1920	1920	1920	1920	1920	1920	1920
	29	23	23	23	23	23	23	23	23	23	23	23	23	23	23	23	23	23	23	23	23									29	667	667	667	667	667	667	667	667	667	667	667	667	29000667	667	667	667	667	667	667
	28	87	87	87	87	87	87	87	87	87	87	87	87	87	87	87	87	87	87	87	87									28	2436	2436	2436	2436	2436	2436	2436	2436	2436	2436	2436	2436	2436	28002436	2436	2436	2436	2436	2436
	27	67	67	67	67	67	67	67	67	67	67	67	67	67	67	67	67	67	67	67	67									27	1809	1809	1809	1809	1809	1809	1809	1809	1809	1809	1809	1809	1809	1809	27001809	1809	1809	1809	1809
	26	34	34	34	34	34	34	34	34	34	34	34	34	34	34	34	34	34	34	34	34									26	884	884	884	884	884	884	884	884	884	884	884	884	884	884	884	26000884	884	884	884
	25	97	97	97	97	97	97	97	97	97	97	97	97	97	97	97	97	97	97	97	97									25	2425	2425	2425	2425	2425	2425	2425	2425	2425	2425	2425	2425	2425	2425	2425	2425	25002425	2425	2425
	24	45	45	45	45	45	45	45	45	45	45	45	45	45	45	45	45	45	45	45	45									24	1080	1080	1080	1080	1080	1080	1080	1080	1080	1080	1080	1080	1080	1080	1080	1080	1080	24001080	1080
	23	34	34	34	34	34	34	34	34	34	34	34	34	34	34	34	34	34	34	34	34									23	782	782	782	782	782	782	782	782	782	782	782	782	782	782	782	782	782	782	23000782
	22	78	78	78	78	78	78	78	78	78	78	78	78	78	78	78	78	78	78	78	78									22	1716	1716	1716	1716	1716	1716	1716	1716	1716	1716	1716	1716	1716	1716	1716	1716	1716	1716	1716
	21	0	0	0	0	0	0	0	0	0	0	0	0	0	0	0	0	0	0	0	0									21	0	0	0	0	0	0	0	0	0	0	0	0	0	0	0	0	0	0	0
	20	78	78	78	78	78	78	78	78	78	78	78	78	78	78	78	78	78	78	78	78									20	1560	1560	1560	1560	1560	1560	1560	1560	1560	1560	1560	1560	1560	1560	1560	1560	1560	1560	1560
	19	34	34	34	34	34	34	34	34	34	34	34	34	34	34	34	34	34	34	34	34									19	646	646	646	646	646	646	646	646	646	646	646	646	646	646	646	646	646	646	646
	18	45	45	45	45	45	45	45	45	45	45	45	45	45	45	45	45	45	45	45	45									18	810	810	810	810	810	810	810	810	810	810	810	810	810	810	810	810	810	810	810
	17	97	97	97	97	97	97	97	97	97	97	97	97	97	97	97	97	97	97	97	97									17	1649	1649	1649	1649	1649	1649	1649	1649	1649	1649	1649	1649	1649	1649	1649	1649	1649	1649	1649
	16	34	34	34	34	34	34	34	34	34	34	34	34	34	34	34	34	34	34	34	34									16	544	544	544	544	544	544	544	544	544	544	544	544	544	544	544	544	544	544	544
	15	67	67	67	67	67	67	67	67	67	67	67	67	67	67	67	67	67	67	67	67									15	1005	1005	1005	1005	1005	1005	1005	1005	1005	1005	1005	1005	1005	1005	1005	1005	1005	1005	1005
	14	87	87	87	87	87	87	87	87	87	87	87	87	87	87	87	87	87	87	87	87									14	1218	1218	1218	1218	1218	1218	1218	1218	1218	1218	1218	1218	1218	1218	1218	1218	1218	1218	1218
	13	23	23	23	23	23	23	23	23	23	23	23	23	23	23	23	23	23	23	23	23									13	299	299	299	299	299	299	299	299	299	299	299	299	299	299	299	299	299	299	299
	12	64	64	64	64	64	64	64	64	64	64	64	64	64	64	64	64	64	64	64	64									12	768	768	768	768	768	768	768	768	768	768	768	768	768	768	768	768	768	768	768
	11	45	45	45	45	45	45	45	45	45	45	45	45	45	45	45	45	45	45	45	45									11	495	495	495	495	495	495	495	495	495	495	495	495	495	495	495	495	495	495	495
	10	90	90	90	90	90	90	90	90	90	90	90	90	90	90	90	90	90	90	90	90									10	900	900	900	900	900	900	900	900	900	900	900	900	900	900	900	900	900	900	900
	9	70	70	70	70	70	70	70	70	70	70	70	70	70	70	70	70	70	70	70	70									9	630	630	630	630	630	630	630	630	630	630	630	630	630	630	630	630	630	630	630
	8	12	12	12	12	12	12	12	12	12	12	12	12	12	12	12	12	12	12	12	12									8	96	96	96	96	96	96	96	96	96	96	96	96	96	96	96	96	96	96	96
	7	33	33	33	33	33	33	33	33	33	33	33	33	33	33	33	33	33	33	33	33									7	231	231	231	231	231	231	231	231	231	231	231	231	231	231	231	231	231	231	231
	6	10	10	10	10	10	10	10	10	10	10	10	10	10	10	10	10	10	10	10	10									6	60	60	60	60	60	60	60	60	60	60	60	60	60	60	60	60	60	60	60
	5	55	55	55	55	55	55	55	55	55	55	55	55	55	55	55	55	55	55	55	55									5	275	275	275	275	275	275	275	275	275	275	275	275	275	275	275	275	275	275	275
	4	5	5	5	5	5	5	5	5	5	5	5	5	5	5	5	5	5	5	5	5									4	20	20	20	20	20	20	20	20	20	20	20	20	20	20	20	20	20	20	20
	3	15	15	15	15	15	15	15	15	15	15	15	15	15	15	15	15	15	15	15	15									3	45	45	45	45	45	45	45	45	45	45	45	45	45	45	45	45	45	45	45
	2	28	28	28	28	28	28	28	28	28	28	28	28	28	28	28	28	28	28	28	28									2	56	56	56	56	56	56	56	56	56	56	56	56	56	56	56	56	56	56	56
	1	25	25	25	25	25	25	25	25	25	25	25	25	25	25	25	25	25	25	25	25									1	25	25	25	25	25	25	25	25	25	25	25	25	25	25	25	25	25	25	25
	42	0	0	0	0	0	0	0	0	0	0	0	0	0	0	0	0	0	0	0	0									42	0	0	0	0	0	0	0	0	0	0	0	0	0	0	0	0	0	0	0
	43	0	0	0	0	0	0	0	0	0	0	0	0	0	0	0	0	0	0	0	0									43	0	0	0	0	0	0	0	0	0	0	0	0	0	0	0	0	0	0	0
	44	0	0	0	0	0	0	0	0	0	0	0	0	0	0	0	0	0	0	0	0									44	0	0	0	0	0	0	0	0	0	0	0	0	0	0	0	0	0	0	0
	45	0	0	0	0	0	0	0	0	0	0	0	0	0	0	0	0	0	0	0	0									45	0	0	0	0	0	0	0	0	0	0	0	0	0	0	0	0	0	0	0
	46	0	0	0	0	0	0	0	0	0	0	0	0	0	0	0	0	0	0	0	0									46	0	0	0	0	0	0	0	0	0	0	0	0	0	0	0	0	0	0	0
	47	0	0	0	0	0	0	0	0	0	0	0	0	0	0	0	0	0	0	0	0									47	0	0	0	0	0	0	0	0	0	0	0	0	0	0	0	0	0	0	0
	48	0	0	0	0	0	0	0	0	0	0	0	0	0	0	0	0	0	0	0	0									48	0	0	0	0	0	0	0	0	0	0	0	0	0	0	0	0	0	0	0
	49	0	0	0	0	0	0	0	0	0	0	0	0	0	0	0	0	0	0	0	0									49	0	0	0	0	0	0	0	0	0	0	0	0	0	0	0	0	0	0	0
	50	0	0	0	0	0	0	0	0	0	0	0	0	0	0	0	0	0	0	0	0									50	0	0	0	0	0	0	0	0	0	0	0	0	0	0	0	0	0	0	0
	51	0	0	0	0	0	0	0	0	0	0	0	0	0	0	0	0	0	0	0	0									51	0	0	0	0	0	0	0	0	0	0	0	0	0	0	0	0	0	0	0
	52	0	0	0	0	0	0	0	0	0	0	0	0	0	0	0	0	0	0	0	0									52	0	0	0	0	0	0	0	0	0	0	0	0	0	0	0	0	0	0	0
	53	0	0	0	0	0	0	0	0	0	0	0	0	0	0	0	0	0	0	0	0									53	0	0	0	0	0	0	0	0	0	0	0	0	0	0	0	0	0	0	0
	54	0	0	0	0	0	0	0	0	0	0	0	0	0	0	0	0	0	0	0	0									54	0	0	0	0	0	0	0	0	0	0	0	0	0	0	0	0	0	0	0
	55	0	0	0	0	0	0	0	0	0	0	0	0	0	0	0	0	0	0	0	0									55	0	0	0	0	0	0	0	0	0	0	0	0	0	0	0	0	0	0	0
	56	0	0	0	0	0	0	0	0	0	0	0	0	0	0	0	0	0	0	0	0									56	0	0	0	0	0	0	0	0	0	0	0	0	0	0	0	0	0	0	0
	57	0	0	0	0	0	0	0	0	0	0	0	0	0	0	0	0	0	0	0	0									57	0	0	0	0	0	0	0	0	0	0	0	0	0	0	0	0	0	0	0
	58	0	0	0	0	0	0	0	0	0	0	0	0	0	0	0	0	0	0	0	0									58	0	0	0	0	0	0	0	0	0	0	0	0	0	0	0	0	0	0	0
	59	0	0	0	0	0	0	0	0	0	0	0	0	0	0	0	0	0	0	0	0									59	0	0	0	0	0	0	0	0	0	0	0	0	0	0	0	0	0	0	0
	60	0	0	0	0	0	0	0	0	0	0	0	0	0	0	0	0	0	0	0	0									60	0	0	0	0	0	0	0	0	0	0	0	0	0	0	0	0	0	0	0
	61	0	0	0	0	0	0	0	0	0	0	0	0	0	0	0	0	0	0	0	0									61	0	0	0	0	0	0	0	0	0	0	0	0	0	0	0	0	0	0	0
	62	0	0	0	0	0	0	0	0	0	0	0	0	0	0	0	0	0	0	0	0									62	0	0	0	0	0	0	0	0	0	0	0	0	0	0	0	0	0	0	0
	63	0	0	0	0	0	0	0	0	0	0	0	0	0	0	0	0	0	0	0	0									63	0	0	0	0	0	0	0	0	0	0	0	0	0	0	0	0	0	0	0
	64	0	0	0	0	0	0	0	0	0	0	0	0	0	0	0	0	0	0	0	0									64	0	0	0	0	0	0	0	0	0	0	0	0	0	0	0	0	0	0	0
	65	0	0	0	0	0	0	0	0	0	0	0	0	0	0	0	0	0	0	0	0									65	0	0	0	0	0	0	0	0	0	0	0	0	0	0	0	0	0	0	0
	66	0	0	0	0	0	0	0	0	0	0	0	0	0	0	0	0	0	0	0	0									66	0	0	0	0	0	0	0	0	0	0	0	0	0	0	0	0	0	0	0
	67	0	0	0	0	0	0	0	0	0	0	0	0	0	0	0	0	0	0	0	0									67	0	0	0	0	0	0	0	0	0	0	0	0	0	0	0	0	0	0	0
	68	0	0	0	0	0	0	0	0	0	0	0	0	0	0	0	0	0	0	0	0									68	0	0	0	0	0	0	0	0	0	0	0	0	0	0	0	0	0	0	0
	69	0	0	0	0	0	0	0	0	0	0	0	0	0	0	0	0	0	0	0	0									69	0	0	0	0	0	0	0	0	0	0	0	0	0	0	0	0	0	0	0
	70	0	0	0	0	0	0	0	0	0	0	0	0	0	0	0	0	0	0	0	0									70	0	0	0	0	0	0	0	0	0	0	0	0	0	0	0	0	0	0	0
	71	0	0	0	0	0	0	0	0	0	0	0	0	0	0	0	0	0	0	0	0									71	0	0	0	0	0	0	0	0	0	0	0	0	0	0	0	0	0	0	0
	72	0	0	0	0	0	0	0	0	0	0	0	0	0	0	0	0	0	0	0	0									72	0	0	0	0	0	0	0	0	0	0	0	0	0	0	0	0	0	0	0
	73	0	0	0	0	0	0	0	0	0	0	0	0	0	0	0	0	0	0	0	0									73	0	0	0	0	0	0	0	0	0	0	0	0	0	0	0	0	0	0	0
	74	0	0	0	0	0	0	0	0	0	0	0	0	0	0	0	0	0	0	0	0									74	0	0	0	0	0	0	0	0	0	0	0	0	0	0	0	0	0	0	0
	75	0	0	0	0	0	0	0	0	0	0	0	0	0	0	0	0	0	0	0	0									75	0	0	0	0	0	0	0	0	0	0	0	0	0	0	0	0	0	0	0
	76	0	0	0	0	0	0	0	0	0	0	0	0	0	0	0	0	0	0	0	0									76	0	0	0	0	0	0	0	0	0	0	0	0	0	0	0	0	0	0	0
	77	0	0	0	0	0	0	0	0	0	0	0	0	0	0	0	0	0	0	0	0									77	0	0	0	0	0	0	0	0	0	0	0	0	0	0	0	0	0	0	0
	78	0	0	0	0	0	0	0	0	0	0	0	0	0	0	0	0	0	0	0	0									78	0	0	0	0	0	0	0	0	0	0	0	0	0	0	0	0	0	0	0
	79	0	0	0	0	0	0	0	0	0	0	0	0	0	0	0	0	0	0	0	0									79	0	0	0	0	0	0	0	0	0	0	0	0	0	0	0	0	0	0	0
	80	0	0	0	0	0	0	0	0	0	0	0	0	0	0	0	0	0	0	0	0									80	0	0	0	0	0	0	0	0	0	0	0	0	0	0	0	0	0	0	0
	81	0	0	0	0	0	0	0	0	0	0	0	0	0	0	0	0	0	0	0	0									81	0	0	0	0	0	0	0	0	0	0	0	0	0	0	0	0	0	0	0
	82	0	0	0	0	0	0	0	0	0	0	0	0	0	0	0	0	0	0	0	0									82	0	0	0	0	0	0	0	0	0	0	0	0	0	0	0	0	0	0	0
	83	0	0	0	0	0	0	0	0	0	0	0	0	0	0	0	0	0	0	0	0									83	0	0	0	0	0	0	0	0	0	0	0	0	0	0	0	0	0	0	0
	84	0	0	0	0	0	0	0	0	0	0	0	0	0	0	0	0	0	0	0	0									84	0	0	0	0	0	0	0	0	0	0	0	0	0	0	0	0	0	0	0
	85	0	0	0	0	0	0	0	0	0	0	0	0	0	0	0	0	0	0	0	0									85	0	0	0	0	0	0	0	0	0	0	0	0	0	0	0	0	0	0	0
	86	0	0	0	0	0	0	0	0	0	0	0	0	0	0	0	0	0	0	0	0									86	0	0	0	0	0	0	0	0	0	0	0	0	0	0	0	0	0	0	0
	87	0	0	0	0	0	0	0	0	0	0	0	0	0	0	0	0	0	0	0	0									87	0	0	0	0	0	0	0	0	0	0	0	0	0	0	0	0	0	0	0
	88	0	0	0	0	0	0	0	0	0	0	0	0	0	0	0	0	0	0	0	0									88	0	0	0	0	0	0	0	0	0	0	0	0	0	0	0	0	0	0	0
	89	0	0	0	0	0	0	0	0	0	0	0	0	0	0	0	0	0	0	0	0									89	0	0	0	0	0	0	0	0	0	0	0	0	0	0	0	0	0	0	0
	90	0	0	0	0	0	0	0	0	0	0	0	0	0	0	0	0	0	0	0	0									90	0	0	0	0	0	0	0	0	0	0	0	0	0	0	0	0	0	0	0
	91	0	0	0	0	0	0	0	0	0	0	0	0	0	0	0	0	0	0	0	0									91	0	0	0	0	0	0	0	0	0	0	0	0	0	0	0	0	0	0	0
	92	0	0	0	0	0	0	0	0	0	0	0	0	0	0	0	0	0	0	0	0									92	0	0	0	0	0	0	0	0	0	0	0	0	0	0	0	0	0	0	0
	93	0	0	0	0	0	0	0	0	0	0	0	0	0	0	0	0	0	0	0	0									93	0	0	0	0	0	0	0	0	0	0	0	0	0	0	0	0	0	0	0
	94	0	0	0	0	0	0	0	0	0	0	0	0	0	0	0	0	0	0	0	0									94	0	0	0	0	0	0	0	0	0	0	0	0	0	0	0	0	0	0	0
	95	0	0	0	0	0	0	0	0	0	0	0	0	0	0	0	0	0	0	0	0									95	0	0	0	0	0	0	0	0	0	0	0	0	0	0	0	0	0	0	0
	96	0	0	0	0	0	0	0	0	0	0	0	0	0	0	0	0	0	0	0	0									96	0	0	0	0	0	0	0	0	0	0	0	0	0	0	0	0	0	0	0
	97	0	0	0	0	0	0	0	0	0	0	0	0	0	0	0	0	0	0	0	0									97	0	0	0	0	0	0	0	0	0	0	0	0	0	0	0	0	0	0	0
	98	0	0	0	0	0	0	0	0	0	0	0	0	0	0	0	0	0	0	0	0									98	0	0	0	0	0	0	0	0	0	0	0	0	0	0	0	0	0	0	0
	99	0	0	0	0	0	0	0	0	0	0	0	0	0	0	0	0	0	0	0	0									99	0	0	0	0	0	0	0	0	0	0	0	0	0	0	0	0	0	0	0
	100	0	0	0	0	0	0	0	0	0	0	0	0	0	0	0	0	0	0	0	0									100	0	0	0	0	0	0	0	0	0	0	0	0	0	0	0	0	0	0	0
	101	0	0	0	0	0	0	0	0	0	0	0	0	0	0	0	0	0	0	0	0									101	0	0	0	0	0	0	0	0	0	0	0	0	0	0	0	0	0	0	0
	102	0	0	0	0	0	0	0	0	0	0	0	0	0	0	0	0	0	0	0	0									102	0	0	0	0	0	0	0	0	0	0	0	0	0	0	0	0	0	0	0
	103	0	0	0	0	0	0	0	0	0	0	0	0	0	0	0	0	0	0	0	0									103	0	0	0	0	0	0	0	0	0	0	0	0	0	0	0	0	0	0	0
	104	0	0	0	0	0	0	0	0	0	0	0	0	0	0	0	0	0	0	0	0									104	0	0	0	0	0	0	0	0	0	0	0	0	0	0	0	0	0	0	0
	105	0	0	0	0	0	0	0	0	0	0	0	0	0	0	0	0	0	0	0	0									105	0	0	0	0	0	0	0	0	0	0	0	0	0	0	0	0	0	0	0
	106	0	0	0	0	0	0	0	0	0	0	0	0	0	0	0	0	0	0	0	0									106	0	0	0	0	0	0	0	0	0	0	0	0	0	0	0	0	0	0	0
	107	0	0	0	0	0	0	0	0	0	0	0	0	0	0	0	0	0	0	0	0									107	0	0	0	0	0	0	0	0	0	0	0	0	0	0	0	0	0	0	0
	108	0	0	0	0	0	0	0	0	0	0	0	0	0	0	0	0	0	0	0	0									108	0	0	0	0	0	0	0	0	0	0	0	0	0	0	0	0	0	0	0
	109	0	0	0	0	0	0	0	0	0	0	0	0	0	0	0	0	0	0	0	0									109	0	0	0	0	0	0	0	0	0	0	0	0	0	0	0	0	0	0	0
	110	0	0	0	0	0	0	0	0	0	0	0	0	0	0	0	0	0	0	0	0									110	0	0	0	0	0	0	0	0	0	0	0	0	0	0	0	0	0	0	0
	111	0	0	0	0	0	0	0	0	0	0	0	0	0	0	0	0	0	0	0	0									111	0	0	0	0	0	0	0	0	0	0	0	0	0	0	0	0	0	0	0
	112	0	0	0	0	0	0	0	0	0	0	0	0	0	0	0	0	0	0	0	0									112	0	0	0	0	0	0	0	0	0	0	0	0	0	0	0	0	0	0	0
	113	0	0	0	0	0	0	0	0	0	0	0	0	0	0	0	0	0	0	0	0									113	0	0	0	0	0	0	0	0	0	0	0	0	0	0	0	0	0	0	0
	114	0	0	0	0	0	0	0	0	0	0	0	0	0	0	0	0	0	0	0	0									114	0	0	0	0	0	0	0	0	0	0	0	0	0	0	0	0	0	0	0
	115	0	0	0	0	0	0	0	0	0	0	0	0	0	0	0	0	0	0	0	0									115	0	0	0	0	0	0	0	0	0	0	0	0	0	0	0	0	0	0	0
	116	0	0	0	0	0	0	0	0	0	0	0	0	0	0	0	0	0	0	0	0									116	0	0	0	0	0	0	0	0	0	0	0	0	0	0	0	0	0	0	0
	117	0	0	0	0	0	0	0	0	0	0	0	0	0	0	0	0	0	0	0	0									117	0	0	0	0	0	0	0	0	0	0	0	0	0	0	0	0	0	0	0
	118	0	0	0	0	0	0	0	0	0	0	0	0	0	0	0	0	0	0	0	0									118	0	0	0	0	0	0	0	0	0	0	0	0	0	0	0	0	0	0	0
	119	0	0	0	0	0	0	0	0	0	0	0	0	0	0	0	0	0	0	0	0									119	0	0	0	0	0	0	0	0	0	0	0	0	0	0	0	0	0	0	0
	120	0	0	0	0	0	0	0	0	0	0	0	0	0	0	0	0	0	0	0	0									120	0	0	0	0	0	0	0	0	0	0	0	0	0	0	0	0	0	0	0
	121	0	0	0	0	0	0	0	0	0	0	0	0	0	0	0	0	0	0	0	0									121	0	0	0	0	0	0	0	0	0	0	0	0	0	0	0	0	0	0	0
	122	0	0	0	0	0	0	0	0	0	0	0	0	0	0	0	0	0	0	0	0									122	0	0	0	0	0	0	0	0	0	0	0	0	0	0	0	0	0	0	0
	123	0	0	0	0	0	0	0	0	0	0	0	0	0	0	0	0	0	0	0	0									123	0	0	0	0	0	0	0	0	0	0	0	0	0	0	0	0	0	0	0
	124	0	0	0	0	0	0	0	0	0	0	0	0	0	0	0	0	0	0	0	0									124	0	0	0	0	0	0	0	0	0	0	0	0	0	0	0	0	0	0	0
	125	0	0	0	0	0	0	0	0	0	0	0	0	0	0	0	0	0	0	0	0									125	0	0	0	0	0	0	0	0	0	0	0	0	0	0	0	0	0	0	0
	126	0	0	0	0	0	0	0	0	0	0	0	0	0	0	0	0	0	0	0	0									126	0	0	0	0	0	0	0	0	0	0	0	0	0	0	0	0	0	0	0
	127	0	0	0	0	0	0	0	0	0	0	0	0	0	0	0	0	0	0	0	0									127	0	0	0	0	0	0	0	0	0	0	0	0	0	0	0	0	0	0	0
	128	0	0	0	0	0	0	0	0	0	0	0	0	0	0	0	0	0	0	0	0									128	0	0	0	0	0	0	0	0	0	0	0	0	0	0	0	0	0	0	0
	129	0	0	0	0	0	0	0	0	0	0	0	0	0	0	0	0	0	0	0	0									129	0	0	0	0	0	0	0	0	0	0	0	0	0	0	0	0	0	0	0
	130	0	0	0	0	0	0	0	0	0	0	0	0	0	0	0	0	0	0	0	0									130	0	0	0	0	0	0	0	0	0	0	0	0	0	0	0	0	0	0	0
	131	0	0	0	0	0	0	0	0	0	0	0	0	0	0	0	0	0	0	0	0									131	0	0	0	0	0	0	0	0	0	0	0	0	0	0	0	0	0	0	0
	132	0	0	0	0	0	0	0	0	0	0	0	0	0	0	0	0	0	0	0	0									132	0	0	0	0	0	0	0	0	0	0	0	0	0	0	0	0	0	0	0
	133	0	0	0	0	0	0	0	0	0	0	0	0	0	0	0	0	0	0	0	0									133	0	0	0	0	0	0	0	0	0	0	0	0	0	0	0	0	0	0	0
	134	0	0	0	0	0	0	0	0	0	0	0	0	0	0	0	0	0	0	0	0									134	0	0	0	0	0	0	0	0	0	0	0	0	0	0	0	0	0	0	0
	135	0	0	0	0	0	0	0	0	0	0	0	0	0	0	0	0	0	0	0	0									135	0	0	0	0	0	0	0	0	0	0	0	0	0	0	0	0	0	0	0
	136	0	0	0	0	0	0	0	0	0	0	0	0	0	0	0	0	0	0	0	0									136	0	0	0	0	0	0	0	0	0	0	0	0	0	0	0	0	0	0	0
	137	0	0	0	0	0	0	0	0	0	0	0	0	0	0	0	0	0	0	0	0									137	0	0	0	0	0	0	0	0	0	0	0	0	0	0	0	0	0	0	0
	138	0	0	0	0	0	0	0	0	0	0	0	0	0	0	0	0	0	0	0	0									138	0	0	0	0	0	0	0	0	0	0	0	0	0	0	0	0	0	0	0
	139	0	0	0	0	0	0	0	0	0	0	0	0	0	0	0	0	0	0	0	0									139	0	0	0	0	0	0	0	0	0	0	0	0	0	0	0	0	0	0	0
	140	0	0	0	0	0	0	0	0	0	0	0	0	0	0	0	0	0	0	0	0									140	0	0	0	0	0	0	0	0	0	0	0	0	0	0	0	0	0	0	0
	141	0	0	0	0	0	0	0	0	0	0	0	0	0	0	0	0	0	0	0	0									141	0	0	0	0	0	0	0	0	0	0	0	0	0	0	0	0	0	0	0
	142	0	0	0	0	0	0	0	0	0	0	0	0	0	0	0	0	0	0	0	0									142	0	0	0	0	0	0	0	0	0	0	0	0	0	0	0	0	0	0	0
	143	0	0	0	0	0	0	0	0	0	0	0	0	0	0	0	0	0	0	0	0									143	0	0	0	0	0	0	0	0	0	0	0	0	0	0	0	0	0	0	0
	144	0	0	0	0	0	0	0	0	0	0	0	0	0	0	0	0	0	0	0	0									144	0	0	0	0	0	0	0	0	0	0	0	0	0	0	0	0	0	0	0
	145	0	0	0	0	0	0	0	0	0	0	0	0	0	0	0	0	0	0	0	0									145	0	0	0	0	0	0	0	0	0	0	0	0	0	0	0	0	0	0	0
	146	0	0	0	0	0	0	0	0	0	0	0	0	0	0	0	0	0	0	0	0									146	0	0	0	0	0	0	0	0	0	0	0	0	0	0	0	0	0	0	0
	147	0	0	0	0	0	0	0	0	0	0	0	0	0	0	0	0	0	0	0	0									147	0	0	0	0	0	0	0	0	0	0	0	0	0	0	0	0	0	0	0
	148	0	0	0	0	0	0	0	0	0	0	0	0	0	0	0	0	0	0	0	0									148	0	0	0	0	0	0	0	0	0	0	0	0	0	0	0	0	0	0	0
	149	0	0	0	0	0	0	0	0	0	0	0	0	0	0	0	0	0	0	0	0									149	0	0	0	0	0	0	0	0	0	0	0	0	0	0	0	0	0	0	0
	150	0	0	0	0	0	0	0	0	0	0	0	0	0	0	0	0	0	0	0	0									150	0	0	0	0	0	0	0	0	0	0	0	0	0	0	0	0	0	0	0
	151	0	0	0	0	0	0	0	0	0	0	0	0	0	0	0	0	0	0	0	0									151	0	0	0	0	0	0	0	0	0	0	0	0	0	0	0	0	0	0	0
	152	0	0	0	0	0	0	0	0	0	0	0	0	0	0	0	0	0	0	0	0									152	0	0	0	0	0	0	0	0	0	0	0	0	0	0	0	0	0	0	0
	153	0	0	0	0	0	0	0	0	0	0	0	0	0	0	0	0	0	0	0	0									153	0	0	0	0	0	0	0	0	0	0	0	0	0	0	0	0	0	0	0
	154	0	0	0	0	0	0	0	0	0	0	0	0	0	0	0	0	0	0	0	0									154	0	0	0	0	0	0	0	0	0	0	0	0	0	0	0	0	0	0	0
	155	0	0	0	0	0	0	0	0	0	0	0	0	0	0	0	0	0	0	0	0									155	0	0	0	0	0	0	0	0	0	0	0	0	0	0	0	0	0	0	0
	156	0	0	0	0	0	0	0	0	0	0	0	0	0	0	0	0	0	0	0	0									156	0	0	0	0	0	0	0	0	0	0	0	0	0	0	0	0	0	0	0
	157	0	0	0	0	0	0	0	0	0	0	0	0	0	0	0	0	0	0	0	0									157	0	0	0	0	0	0	0	0	0	0	0	0	0	0	0	0	0	0	0
	158	0	0	0	0	0	0	0	0	0	0	0	0	0	0	0	0	0	0	0	0									158	0	0	0	0	0	0	0	0	0	0	0	0	0	0	0	0	0	0	0
	159	0	0	0	0	0	0	0	0	0	0	0	0	0	0	0	0	0	0	0	0									159	0	0	0	0	0	0	0	0	0	0	0	0	0	0	0	0	0	0	0
	160	0	0	0	0	0	0	0	0	0	0	0	0	0	0	0	0	0	0	0	0									160	0	0	0	0	0	0	0	0	0	0	0	0	0	0	0	0	0	0	0
	161	0	0	0	0	0	0	0	0	0	0	0	0	0	0	0	0	0	0	0	0									161	0	0	0	0	0	0	0	0	0	0	0	0	0	0	0	0	0	0	0
	162	0	0	0	0	0	0	0	0	0	0	0	0	0	0	0	0	0	0	0	0									162	0	0	0	0	0	0	0	0	0	0	0	0	0	0	0	0	0	0	0
	163	0	0	0	0	0	0	0	0	0	0	0	0	0	0	0	0	0	0	0	0									163	0	0	0	0	0	0	0	0	0	0	0	0	0	0	0	0	0	0	0
	164	0	0	0	0	0	0	0	0	0	0	0	0	0	0	0	0	0	0	0	0									164	0	0	0	0	0	0	0	0	0	0	0	0	0	0	0	0	0	0	0
	165	0	0	0	0	0	0	0	0	0	0	0	0	0	0	0	0	0	0	0	0									165	0	0	0	0	0	0	0	0	0	0	0	0	0	0	0	0	0	0	0
	166	0	0	0	0	0	0	0	0	0	0	0	0	0	0	0	0	0	0	0	0									166	0	0	0	0	0	0	0	0	0	0	0	0	0	0	0	0	0	0	0
	167	0	0	0	0	0	0	0	0	0	0	0	0	0	0	0	0	0	0	0	0									167	0	0	0	0	0	0	0	0	0	0	0	0	0	0	0	0	0	0	0
	168	0	0	0	0	0	0	0	0	0	0	0	0	0	0	0	0	0	0	0	0									168	0	0	0	0	0	0	0	0	0	0	0	0	0	0	0	0	0	0	0
	169	0	0	0	0	0	0	0	0	0	0	0	0	0	0	0	0	0	0	0	0									169	0	0	0	0	0	0	0	0	0	0	0	0	0	0	0	0	0	0	0
	170	0	0	0	0	0	0	0	0	0	0	0	0	0	0	0	0	0	0	0	0									170	0	0	0	0	0	0	0	0	0	0	0	0	0	0	0	0	0	0	0
	171	0	0	0	0	0	0	0	0	0	0	0	0	0	0	0	0	0	0	0	0									171	0	0	0	0	0	0	0	0	0	0	0	0	0	0	0	0	0	0	0
	172	0	0	0	0	0	0	0	0	0	0	0	0	0	0	0	0	0	0	0	0									172	0	0	0	0	0	0	0	0	0	0	0	0	0	0	0	0	0	0	0
	173	0	0	0	0	0	0	0	0	0	0	0	0	0	0	0	0	0	0	0	0									173	0	0	0	0	0	0	0	0	0	0	0	0	0	0	0	0	0	0	0
	174	0	0	0	0	0	0	0	0	0	0	0	0	0	0	0	0	0	0	0	0									174	0	0	0	0	0	0	0	0	0	0	0	0	0	0	0	0	0	0	0
	175	0	0	0	0	0	0	0	0	0	0	0	0	0	0	0	0	0	0	0	0									175	0	0	0	0	0	0	0	0	0	0	0	0	0	0	0	0	0	0	0
	176	0	0	0	0	0	0	0	0	0	0	0	0	0	0	0	0	0	0	0	0									176	0	0	0	0	0	0	0	0	0	0	0	0	0	0	0	0	0	0	0
	177	0	0	0	0	0	0	0	0	0	0	0	0	0	0	0	0	0	0	0	0									177	0	0	0	0	0	0	0	0	0	0	0	0	0	0	0	0	0	0	0
	178	0	0	0	0	0	0	0	0	0	0	0	0	0	0	0	0	0	0	0	0									178	0	0	0	0	0	0	0	0	0	0	0	0	0	0	0	0	0	0	0
	179	0	0	0	0	0	0	0	0	0	0	0	0	0	0	0	0	0	0	0	0									179	0	0	0	0	0	0	0	0	0	0	0	0	0	0	0	0	0	0	0
	180	0	0	0	0	0	0	0	0	0	0	0	0	0	0	0	0	0	0	0	0									180	0	0	0	0	0	0	0	0	0	0	0	0	0	0	0	0	0	0	0
	181	0	0	0	0	0	0	0	0	0	0	0	0	0	0	0	0	0	0	0	0									181	0	0	0	0	0	0	0	0	0	0	0	0	0	0	0	0	0	0	0
	182	0	0	0	0	0	0	0	0	0	0	0	0	0	0	0	0	0	0	0	0									182	0	0	0	0	0	0	0	0	0	0	0	0	0	0	0	0	0	0	0
	183	0	0	0	0	0	0	0	0	0	0	0	0	0	0	0	0	0	0	0	0									183	0	0	0	0	0	0	0	0	0	0	0	0	0	0	0	0	0	0	0
	184	0	0	0	0	0	0	0	0	0	0	0	0	0	0	0	0	0	0	0	0									184	0	0	0	0	0	0	0	0	0	0	0	0	0	0	0	0	0	0	0
	185	0	0	0	0	0	0	0	0	0	0	0	0	0	0	0	0	0	0	0	0									185	0	0	0	0	0	0	0	0	0	0	0	0	0	0	0	0	0	0	0
	186	0	0	0	0	0	0	0	0	0	0	0	0	0	0	0	0	0	0	0	0									186	0	0	0	0	0	0	0	0	0	0	0	0	0	0	0	0	0	0	0
	187	0	0	0	0	0	0	0	0	0	0	0	0	0	0	0	0	0	0	0	0									187	0	0	0	0	0	0	0	0	0	0	0	0	0	0	0	0	0	0	0
	188	0	0	0	0	0	0	0	0	0	0	0	0	0	0	0	0	0	0	0	0									188	0	0	0	0	0	0	0	0	0	0	0	0	0	0	0	0	0	0	0
	189	0	0	0	0	0	0	0	0	0	0	0	0	0	0	0	0	0	0	0	0									189	0	0	0	0	0	0	0	0	0	0	0	0	0	0	0	0	0	0	0
	190	0	0	0	0	0	0	0	0	0	0	0	0	0	0	0	0	0	0	0	0									190	0	0	0	0	0	0	0	0	0	0	0	0	0	0	0	0	0	0	0
	191	0	0	0	0	0	0	0	0	0	0	0	0	0	0	0	0	0	0	0	0									191	0	0	0	0	0	0	0	0	0	0	0	0	0	0	0	0	0	0	0
	192	0	0	0	0	0	0	0	0	0	0	0	0	0	0	0	0	0	0	0	0									192	0	0	0	0	0	0	0	0	0	0	0	0	0	0	0	0	0	0	0
	193	0	0	0	0	0	0	0	0	0	0	0	0	0	0	0	0	0	0	0	0									193	0	0	0	0	0	0	0	0	0	0	0	0	0	0	0	0	0	0	0
	194	0	0	0	0	0	0	0	0	0	0	0	0	0	0	0	0	0	0	0	0									194	0	0	0	0	0	0	0	0	0	0	0	0	0	0	0	0	0	0	0
	195	0	0	0	0	0	0	0	0	0	0	0	0	0	0	0	0	0	0	0	0									195	0	0	0	0	0	0	0	0	0	0	0	0	0	0	0	0	0	0	0
	196	0	0	0	0	0	0	0	0	0	0	0	0	0	0	0	0	0	0	0	0									196	0	0	0	0	0	0	0	0	0	0	0	0	0	0	0	0	0	0	0
	197	0	0	0	0	0	0	0	0	0	0	0	0	0	0	0	0	0	0	0	0									197	0	0	0	0	0	0	0	0	0	0	0	0	0	0	0	0	0	0	0
	198	0	0	0	0	0	0	0	0	0	0	0	0	0	0	0	0	0	0	0	0									198	0	0	0	0	0	0	0	0	0	0	0	0	0	0	0	0	0	0	0
	199	0	0	0	0	0	0	0	0	0	0	0	0	0	0	0	0	0	0	0	0									199	0	0	0	0	0	0	0	0	0	0	0	0	0	0	0	0	0	0	0
	200	0	0	0	0	0	0	0	0	0	0	0	0	0	0	0	0	0	0	0	0									200	0	0	0	0	0	0	0	0	0	0	0	0	0	0	0	0	0	0	0
	201	0	0	0	0	0	0	0	0	0	0	0	0	0	0	0	0	0	0	0	0									201	0	0	0	0	0	0	0	0	0	0	0	0	0	0	0	0	0	0	0
	202	0	0	0	0	0	0	0	0	0	0	0	0	0	0	0	0	0	0	0	0									202	0	0	0	0	0	0	0	0	0	0	0	0	0	0	0	0	0	0	0
	203	0	0	0	0	0	0	0	0	0	0	0	0	0	0	0	0	0	0	0	0									203	0	0	0	0	0	0	0	0	0	0	0	0	0	0	0	0	0	0	0
	204	0	0	0	0	0	0	0	0	0	0	0	0	0	0	0	0	0	0	0	0									204	0	0	0	0	0	0	0	0	0	0	0	0	0	0	0	0	0	0	0
	205	0	0	0	0	0	0	0	0	0	0	0	0	0	0	0	0	0	0	0	0									205	0	0	0	0	0	0	0	0	0	0	0	0	0	0	0	0	0	0	0
	206	0	0	0	0	0	0	0	0	0	0	0	0	0	0	0	0	0	0	0	0									206	0	0	0	0	0	0	0	0	0	0	0	0	0	0	0	0	0	0	0
	207	0	0	0	0	0	0	0	0	0	0	0	0	0	0	0	0	0	0	0	0									207	0	0	0	0	0	0	0	0	0	0	0	0	0	0	0	0	0	0	0
	208	0	0	0	0	0	0	0	0	0	0	0	0	0	0	0	0	0	0	0	0									208	0	0	0	0	0	0	0	0	0	0	0	0	0	0	0	0	0	0	0
	209	0	0	0	0	0	0	0	0	0	0	0	0	0	0	0	0	0	0	0	0									209	0	0	0	0	0	0	0	0	0	0	0	0	0	0	0	0	0	0	0
	210	0	0	0	0	0	0	0	0	0	0	0	0	0	0	0	0	0	0	0	0									210	0	0	0	0	0	0	0	0	0	0	0	0	0	0	0	0	0	0	0
	211	0	0	0	0	0	0	0	0	0	0	0	0	0	0	0	0	0	0	0	0									211	0	0	0	0	0	0	0	0	0	0	0	0	0	0	0	0	0	0	0
	212	0	0	0	0	0	0	0	0	0	0	0	0	0	0	0	0	0	0	0	0									212	0	0	0	0	0	0	0	0	0	0	0	0	0	0	0	0	0	0	0
	213	0	0	0	0	0	0	0	0	0	0	0	0	0	0	0	0	0	0	0	0									213	0	0	0	0	0	0	0	0	0	0	0	0	0	0	0	0	0	0	0
	214	0	0	0	0	0	0	0	0	0	0	0	0	0	0	0	0	0	0	0	0									214	0	0	0	0	0	0	0	0	0	0	0	0	0	0	0	0	0	0	0
	215	0	0	0	0	0	0	0	0	0	0	0	0	0	0	0	0	0	0	0	0									215	0	0	0	0	0	0	0	0	0	0	0	0	0	0	0	0	0	0	0
	216	0	0	0	0	0	0	0	0	0	0	0	0	0	0	0	0	0	0	0	0									216	0	0	0	0	0	0	0	0	0	0	0	0	0	0	0	0	0	0	0
	217	0	0	0	0	0	0	0	0	0	0	0	0	0	0	0	0	0	0	0	0									217	0	0	0	0	0	0	0	0	0	0	0	0	0	0	0	0	0	0	0
	218	0	0	0	0	0	0	0	0	0	0	0	0	0	0	0	0	0	0	0	0									218	0	0	0	0	0	0	0	0	0	0	0	0	0	0	0	0	0	0	0
	219	0	0	0	0	0	0	0	0	0	0	0	0	0	0	0	0	0	0	0	0									219	0	0	0	0	0	0	0	0	0	0	0	0	0	0	0	0	0	0	0
	220	0	0	0	0	0	0	0	0	0	0	0	0	0	0	0	0	0	0	0	0									220	0	0	0	0	0	0	0	0	0	0	0	0	0	0	0	0	0	0	0
	221	0	0	0	0	0	0	0	0	0	0	0	0	0	0	0	0	0	0	0	0									221	0	0	0	0	0	0	0	0	0	0	0	0	0	0	0	0	0	0	0
	222	0	0	0	0	0	0	0	0	0	0	0	0	0	0	0	0	0	0	0	0									222	0	0	0	0	0	0	0	0	0	0	0	0	0	0	0	0	0	0	0
	223	0	0	0	0	0	0	0	0	0	0	0	0	0	0	0	0	0	0	0	0									223	0	0	0	0	0	0	0	0	0	0	0	0	0	0	0	0	0	0	0
	224	0	0	0	0	0	0	0	0	0	0	0	0	0	0	0	0	0	0	0	0									224	0	0	0	0	0	0	0	0	0	0	0	0	0	0	0	0	0	0	0
	225	0	0	0	0	0	0	0	0	0	0	0	0	0	0	0	0	0	0	0	0									225	0	0	0	0	0	0	0	0	0	0	0	0	0	0	0	0	0	0	0
	226	0	0	0	0	0	0	0	0	0	0	0	0	0	0	0	0	0	0	0	0									226	0	0	0	0	0	0	0	0	0	0	0	0	0	0	0	0	0	0	0
	227	0	0	0	0	0	0	0	0	0	0	0	0	0	0	0	0	0	0	0	0									227	0	0	0	0	0	0	0	0	0	0	0	0	0	0	0	0	0	0	0
	228	0	0	0	0	0	0	0	0	0	0	0	0	0	0	0	0	0	0	0	0									228	0	0	0	0	0	0	0	0	0	0	0	0	0	0	0	0	0	0	0
	229	0	0	0	0	0	0	0	0	0	0	0	0	0	0	0	0	0	0	0	0									229	0	0	0	0	0	0	0	0	0	0	0	0	0	0	0	0	0	0	0
	230	0	0	0	0	0	0	0	0	0	0	0	0	0	0	0	0	0	0	0	0									230	0	0	0	0	0	0	0	0	0	0	0	0	0	0	0	0	0	0	0
	231	0	0	0	0	0	0	0	0	0	0	0	0	0	0	0	0	0	0	0	0									231	0	0	0	0	0	0	0	0	0	0	0	0	0	0	0	0	0	0	0
	232	0	0	0	0	0	0	0	0	0	0	0	0	0	0	0	0	0	0	0	0									232	0	0	0	0	0	0	0	0	0	0	0	0	0	0	0	0	0	0	0
	233	0	0	0	0	0	0	0	0	0	0	0	0	0	0	0	0	0	0	0	0									233	0	0	0	0	0	0	0	0	0	0	0	0	0	0	0	0	0	0	0
	234	0	0	0	0	0	0	0	0	0	0	0	0	0	0	0	0	0	0	0	0									234	0	0	0	0	0	0	0	0	0	0	0	0	0	0	0	0	0	0	0
	235	0	0	0	0	0	0	0	0	0	0	0	0	0	0	0	0	0	0	0	0									235	0	0	0	0	0	0	0	0	0	0	0	0	0	0	0	0	0	0	0
	236	0	0	0	0	0	0	0	0	0	0	0	0	0	0	0	0	0	0	0	0									236	0	0	0	0	0	0	0	0	0	0	0	0	0	0	0	0	0	0	0
	237	0	0	0	0	0	0	0	0	0	0	0	0	0	0	0	0	0	0	0	0									237	0	0	0	0	0	0	0	0	0	0	0	0	0	0	0	0	0	0	0
	238	0	0	0	0	0	0	0	0	0	0	0	0	0	0	0	0	0	0	0	0									238	0	0	0	0	0	0	0	0	0	0	0	0	0	0	0	0	0	0	0
	239	0	0	0	0	0	0	0	0	0	0	0	0	0	0	0	0	0	0	0	0									239	0	0	0	0	0	0	0	0	0	0	0	0	0	0	0	0	0	0	0
	240	0	0	0	0	0	0	0	0	0	0	0	0	0	0	0	0	0	0	0	0									240	0	0	0	0	0	0	0	0	0	0	0	0	0	0	0	0	0	0	0
	241	0	0	0	0	0	0	0	0	0	0	0	0	0	0	0	0	0	0	0	0									241	0	0	0	0	0	0	0	0	0	0	0	0	0	0	0	0	0	0	0
	242	0	0	0	0	0	0	0	0	0	0	0	0	0	0	0	0	0	0	0	0									242	0	0	0	0	0	0	0	0	0	0	0	0	0	0	0	0	0	0	0
	243	0	0	0	0	0	0	0	0	0	0	0	0	0	0	0	0	0	0	0	0									243	0	0	0	0	0	0	0	0	0	0	0	0	0	0	0	0	0	0	0
	244	0	0	0	0	0	0	0	0	0	0	0	0	0	0	0	0	0	0	0	0									244	0	0	0	0	0	0	0	0	0	0	0	0	0	0	0	0	0	0	0
	245	0	0	0	0	0	0	0	0	0	0	0	0	0	0	0	0	0	0	0	0									245	0	0	0	0	0	0	0	0	0	0	0	0	0	0	0	0	0	0	0
	246	0	0	0	0	0	0	0	0	0	0	0	0	0	0	0	0	0	0	0	0									246	0	0	0	0	0	0	0	0	0	0	0	0	0	0	0	0	0	0	0
	247	0	0	0	0	0	0	0	0	0	0	0	0	0	0	0	0	0	0	0	0									247	0	0	0	0	0	0	0	0	0	0	0	0	0	0	0	0	0	0	0
	248	0	0	0	0	0	0	0	0	0	0	0	0	0	0	0	0	0	0	0	0									248	0	0	0	0	0	0	0	0	0	0	0	0	0	0	0	0	0	0	0
	249	0	0	0	0	0	0	0	0	0	0	0	0	0	0	0	0	0	0	0	0									249	0	0	0	0	0	0	0	0	0	0	0	0	0	0	0	0	0	0	0
	250	0	0	0	0	0	0	0	0	0	0	0	0	0	0	0	0	0	0	0	0									250	0	0	0	0	0	0	0	0	0	0	0	0	0	0	0	0	0	0	0
	251	0	0	0	0	0	0	0	0	0	0	0	0	0	0	0	0	0	0	0	0									251	0	0	0	0	0	0	0	0	0	0	0	0	0	0	0	0	0	0	0
	252	0	0	0	0	0	0	0	0	0	0	0	0	0	0	0	0	0	0	0	0									252	0	0	0	0	0	0	0	0	0	0	0	0	0	0	0	0	0	0	0
	253	0	0	0	0	0	0	0	0	0	0	0	0	0	0	0	0	0	0	0	0									253	0	0	0	0	0	0	0	0	0	0	0	0	0	0	0	0	0	0	0
	254	0	0	0	0	0	0	0	0	0	0	0	0	0	0	0	0	0	0	0	0									254	0	0	0	0	0	0	0	0	0	0	0	0	0	0	0	0	0	0	0
	255	0	0	0	0	0	0	0	0	0	0	0	0	0	0	0	0	0	0	0	0									255	0	0	0	0	0	0	0	0	0	0	0	0	0	0	0	0	0	0	0
	256	0	0	0	0	0	0	0	0	0	0	0	0	0	0	0	0	0	0	0	0									256	0	0	0	0	0	0	0	0	0	0	0	0	0	0	0	0	0	0	0
	257	0	0	0	0	0	0	0	0	0	0	0	0	0	0	0	0	0	0	0	0									257	0	0	0	0	0	0	0	0	0	0	0	0	0	0	0	0	0	0	0
	258	0	0	0	0	0	0	0	0	0	0	0	0	0	0	0	0	0	0	0	0									258	0	0	0	0	0	0	0	0	0	0	0	0	0	0	0	0	0	0	0
	259	0	0	0	0	0	0	0	0	0	0	0	0	0	0	0	0	0	0	0	0									259	0	0	0	0	0	0	0	0	0	0	0	0	0	0	0	0	0	0	0
	260	0	0	0	0	0	0	0	0	0	0	0	0	0	0	0	0	0	0	0	0									260	0	0	0	0	0	0	0	0	0	0	0	0	0	0	0	0	0	0	0
	261	0	0	0	0	0	0	0	0	0	0	0	0	0	0	0	0	0	0	0	0									261	0	0	0	0	0	0	0	0	0	0	0	0	0	0	0	0	0	0	0
	262	0	0	0	0	0	0	0	0	0	0	0	0	0	0	0	0	0	0	0	0									262	0	0	0	0	0	0	0	0	0	0	0	0	0	0	0	0	0	0	0
	263	0	0	0	0	0	0	0	0	0	0	0	0	0	0	0	0	0	0	0	0									263	0	0	0	0	0	0	0	0	0	0	0	0	0	0	0	0	0	0	0
	264	0	0	0	0	0	0	0	0	0	0	0	0	0	0	0	0	0	0	0	0									264	0	0	0	0	0	0	0	0	0	0	0	0	0	0	0	0	0	0	0
	265	0	0	0	0	0	0	0	0	0	0	0	0	0	0	0	0	0	0	0	0									265	0	0	0	0	0	0	0	0	0	0	0	0	0	0	0	0	0	0	0
	266	0	0	0	0	0	0	0	0	0	0	0	0	0	0	0	0	0	0	0	0									266	0	0	0	0	0	0	0	0	0	0	0	0	0	0	0	0	0	0	0
	267	0	0	0	0	0	0	0	0	0	0	0	0	0	0	0	0	0	0	0	0									267	0	0	0	0	0	0	0	0	0	0	0	0	0	0	0	0	0	0	0
	268	0	0	0	0	0	0	0	0	0	0	0	0	0	0	0	0	0	0	0	0									268	0	0	0	0	0	0	0	0	0	0	0	0	0	0	0	0	0	0	0
	269	0	0	0	0	0	0	0	0	0	0	0	0	0	0	0	0	0	0	0	0									269	0	0	0	0	0	0	0	0	0	0	0	0	0	0	0	0	0	0	0
	270	0	0	0	0	0	0	0	0	0	0	0	0	0	0	0	0	0	0	0	0									270	0	0	0	0	0	0	0	0	0	0	0	0	0	0	0	0	0	0	0
	271	0	0	0	0	0	0	0	0	0	0	0	0	0	0	0	0	0	0	0	0									271	0	0	0	0	0	0	0	0	0	0	0	0	0	0	0	0	0	0	0
	272	0	0	0	0	0	0	0	0	0	0	0	0	0	0	0	0	0	0	0	0									272	0	0	0	0	0	0	0	0	0	0	0	0	0	0	0	0	0	0	0
	273	0	0	0	0	0	0	0	0	0	0	0	0	0	0	0	0	0	0	0	0									273	0	0	0	0	0	0	0	0	0	0	0	0	0	0	0	0	0	0	0
	274	0	0	0	0	0	0	0	0	0	0	0	0	0	0	0	0	0	0	0	0									274	0	0	0	0	0	0	0	0	0	0	0	0	0	0	0	0	0	0	0
	275	0	0	0	0	0	0	0	0	0	0	0	0	0	0	0	0	0	0	0	0									275	0	0	0	0	0	0	0	0	0	0	0	0	0	0	0	0	0	0	0
	276	0	0	0	0	0	0	0	0	0	0	0	0	0	0	0	0	0	0	0	0									276	0	0	0	0	0	0	0	0	0	0	0	0	0	0	0	0	0	0	0
	277	0	0	0	0	0	0	0	0	0	0	0	0	0	0	0	0	0	0	0	0									277	0	0	0	0	0	0	0	0	0	0	0	0	0	0	0	0	0	0	0
	278	0	0	0	0	0	0	0	0	0	0	0	0	0	0	0	0	0	0	0	0									278	0	0	0	0	0	0	0	0	0	0	0	0	0	0	0	0	0	0	0
	279	0	0	0	0	0	0	0	0	0	0	0	0	0	0	0	0	0	0	0	0									279	0	0	0	0	0	0	0	0	0	0	0	0	0	0	0	0	0	0	0
	280	0	0	0	0	0	0	0	0	0	0	0	0	0	0	0	0	0	0	0	0									280	0	0	0	0	0	0	0	0	0	0	0	0	0	0	0	0	0	0	0
	281	0	0	0	0	0	0	0	0	0	0	0	0	0	0	0	0	0	0	0	0									281	0	0	0	0	0	0	0	0	0	0	0	0	0	0	0	0	0	0	0
	282	0	0	0	0	0	0	0	0	0	0	0	0	0	0	0	0	0	0	0	0									282	0	0	0	0	0	0	0	0	0	0	0	0	0	0	0	0	0	0	0
	283	0	0	0	0	0	0	0	0	0	0	0	0	0	0	0	0	0	0	0	0									283	0	0	0	0	0	0	0	0	0	0	0	0	0	0	0	0	0	0	0
	284	0	0	0	0	0	0	0	0	0	0	0	0	0	0	0	0	0	0	0	0									284	0	0	0	0	0	0	0	0	0	0	0	0	0	0	0	0	0	0	0
	285	0	0	0	0	0	0	0	0	0	0	0	0	0	0	0	0	0	0	0	0									285	0	0	0	0	0	0	0	0	0	0	0	0	0	0	0	0	0	0	0
	286	0	0	0	0	0	0	0	0	0	0	0	0	0	0	0	0	0	0	0	0									286	0	0	0	0	0	0	0	0	0	0	0	0	0	0	0	0	0	0	0
	287	0	0	0	0	0	0	0	0	0	0	0	0	0	0	0	0	0	0	0	0									287	0	0	0	0	0	0	0	0	0	0	0	0	0	0	0	0	0	0	0
	288	0	0	0	0	0	0	0	0	0	0	0	0	0	0	0	0	0	0	0	0									288	0	0	0	0	0	0	0	0	0	0	0	0	0	0	0	0	0	0	0
	289	0	0	0	0	0	0	0	0	0	0	0	0	0	0	0	0	0	0	0	0									289	0	0	0	0	0	0	0	0	0	0	0	0	0	0	0	0	0	0	0
	290	0	0	0	0	0	0	0	0	0	0	0	0	0	0	0	0	0	0	0	0									290	0	0	0	0	0	0	0	0	0	0	0	0	0	0	0	0	0	0	0
	291	0	0	0	0	0	0	0	0	0	0	0	0	0	0	0	0	0	0	0	0									291	0	0	0	0	0	0	0	0	0	0	0	0	0	0	0	0	0	0	0
	292	0	0	0	0	0	0	0	0	0	0	0	0	0	0	0	0	0	0	0	0									292	0	0	0	0	0	0	0	0	0	0	0	0	0	0	0	0	0	0	0
	293	0	0	0	0	0	0	0	0	0	0	0	0	0	0	0	0	0	0	0	0									293	0	0	0	0	0	0	0	0	0	0	0	0	0	0	0	0	0	0	0
	294	0	0	0	0	0	0	0	0	0	0	0	0	0	0	0	0	0	0	0	0									294	0	0	0	0	0	0	0	0	0	0	0	0	0	0	0	0	0	0	0
	295	0	0	0	0	0	0	0	0	0	0	0	0	0	0	0	0	0	0	0	0									295	0	0	0	0	0	0	0	0	0	0	0	0	0	0	0	0	0	0	0
	296	0	0	0	0	0	0	0	0	0	0	0	0	0	0	0	0	0	0	0	0									296	0	0	0	0	0	0	0	0	0	0	0	0	0	0	0	0	0	0	0
	297	0	0	0	0	0	0	0	0	0	0	0	0	0	0	0	0	0	0	0	0									297	0	0	0	0	0	0	0	0	0	0	0	0	0	0	0	0	0	0	0
	298	0	0	0	0	0	0	0	0	0	0	0	0	0	0	0	0	0	0	0	0									298	0	0	0	0	0	0	0	0	0	0	0	0	0	0	0	0	0	0	0
	299	0	0	0	0	0	0	0	0	0	0	0	0	0	0	0	0	0	0	0	0									299	0	0	0	0	0	0	0	0	0	0	0	0	0	0	0	0	0	0	0
	300	0	0	0	0	0	0	0	0	0	0	0	0	0	0	0	0	0	0	0	0									300	0	0	0	0	0	0	0	0	0	0	0	0	0	0	0	0	0	0	0
	301	0	0	0	0	0	0	0	0	0	0	0	0	0	0	0	0	0	0	0	0									301	0	0	0	0	0	0	0	0	0	0	0	0	0	0	0	0	0	0	0
	302	0	0	0	0	0	0	0	0	0	0	0	0	0	0	0	0	0	0	0	0									302	0	0	0	0	0	0	0	0	0	0	0	0	0	0	0	0	0	0	0
	303	0	0	0	0	0	0	0	0	0	0	0	0	0	0	0	0	0	0	0	0									303	0	0	0	0	0	0	0	0	0	0	0	0	0	0	0	0	0	0	0
	304	0	0	0	0	0	0	0	0	0	0	0	0	0	0	0	0	0	0	0	0									304	0	0	0	0	0	0	0	0	0	0	0	0	0	0	0	0	0	0	0
	305	0	0	0	0	0	0	0	0	0	0	0	0	0	0	0	0	0	0	0	0									305	0	0	0	0	0	0	0	0	0	0	0	0	0	0	0	0	0	0	0
	306	0	0	0	0	0	0	0	0	0	0	0	0	0	0	0	0	0	0	0	0									306	0	0	0	0	0	0	0	0	0	0	0	0	0	0	0	0	0	0	0
	307	0	0	0	0	0	0	0	0	0	0	0	0	0	0	0	0	0	0	0	0									307	0	0	0	0	0	0	0	0	0	0	0	0	0	0	0	0	0	0	0
	308	0	0	0	0	0	0	0	0	0	0	0	0	0	0	0	0	0	0	0	0									308	0	0	0	0	0	0	0	0	0	0	0	0	0	0	0	0	0	0	0
	309	0	0	0	0	0	0	0	0	0	0	0	0	0	0	0	0	0	0	0	0									309	0	0	0	0	0	0	0	0	0	0	0	0	0	0	0	0	0	0	0
	310	0	0	0	0	0	0	0	0	0	0	0	0	0	0	0	0	0	0	0	0									310	0	0	0	0	0	0	0	0	0	0	0	0	0	0	0	0	0	0	0
	311	0	0	0	0	0	0	0	0	0	0	0	0	0	0	0	0	0	0	0	0									311	0	0	0	0	0	0	0	0	0	0	0	0	0	0	0	0	0	0	0
	312	0	0	0	0	0	0	0	0	0	0	0	0	0	0	0	0	0	0	0	0									312	0	0	0	0	0	0	0	0	0	0	0	0	0	0	0	0	0	0	0
	313	0	0	0	0	0	0	0	0	0	0	0	0	0	0	0	0	0	0	0	0									313	0	0	0	0	0	0	0	0	0	0	0	0	0	0	0	0	0	0	0
	314	0	0	0	0	0	0	0	0	0	0	0	0	0	0	0	0	0	0	0	0									314	0	0	0	0	0	0	0	0	0	0	0	0	0	0	0	0	0	0	0
	315	0	0	0	0	0	0	0	0	0	0	0	0	0	0	0	0	0	0	0	0									315	0	0	0	0	0	0	0	0	0	0	0	0	0	0	0	0	0	0	0
	316	0	0	0	0	0	0	0	0	0	0	0	0	0	0	0	0	0	0	0	0									316	0	0	0	0	0	0	0	0	0	0	0	0	0	0	0	0	0	0	0
	317	0	0	0	0	0	0	0	0	0	0	0	0	0	0	0	0	0	0	0	0									317	0	0	0	0	0	0	0	0	0	0	0	0	0	0	0	0	0	0	0
	318	0	0	0	0	0	0	0	0	0	0	0	0	0	0	0	0	0	0	0	0									318	0	0	0	0	0	0	0	0	0	0	0	0	0	0	0	0	0	0	0
	319	0	0	0	0	0	0	0	0	0	0	0	0	0	0	0	0	0	0	0	0									319	0	0	0	0	0	0	0	0	0	0	0	0	0	0	0	0	0	0	0
	320	0	0	0	0	0	0	0	0	0	0	0	0	0	0	0	0	0	0	0	0									320	0	0	0	0	0	0	0	0	0	0	0	0	0	0	0	0	0	0	0
	321	0	0	0	0	0	0	0	0	0	0	0	0	0	0	0	0	0	0	0	0									321	0	0	0	0	0	0	0	0	0	0	0	0	0	0	0	0	0	0	0
	322	0	0	0	0	0	0	0	0	0	0	0	0	0	0	0	0	0	0	0	0									322	0	0	0	0	0	0	0	0	0	0	0	0	0	0	0	0	0	0	0
	323	0	0	0	0	0	0	0	0	0	0	0	0	0	0	0	0	0	0	0	0									323	0	0	0	0	0	0	0	0	0	0	0	0	0	0	0	0	0	0	0
	324	0	0	0	0	0	0	0	0	0	0	0	0	0	0	0	0	0	0	0	0									324	0	0	0	0	0	0	0	0	0	0	0	0	0	0	0	0	0	0	0
	325	0	0	0	0	0	0	0	0	0	0	0	0	0	0	0	0	0	0	0	0									325	0	0	0	0	0	0	0	0	0	0	0	0	0	0	0	0	0	0	0
	326	0	0	0	0	0	0	0	0	0	0	0	0	0	0	0	0	0	0	0	0									326	0	0	0	0	0	0	0	0	0	0	0	0	0	0	0	0	0	0	0
	327	0	0	0	0	0	0	0	0	0	0	0	0	0	0	0	0	0	0	0	0									327	0	0	0	0	0	0	0	0	0	0	0	0	0	0	0	0	0	0	0
	328	0	0	0	0	0	0	0	0	0	0	0	0	0	0	0	0	0	0	0	0									328	0	0	0	0	0	0	0	0	0	0	0	0	0	0	0	0	0	0	0
	329	0	0	0	0	0	0	0	0	0	0	0	0	0	0	0	0	0	0	0	0									329	0	0	0	0	0	0	0	0	0	0	0	0	0	0	0	0	0	0	0
	330	0	0	0	0	0	0	0	0	0	0	0	0	0	0	0	0	0	0	0	0									330	0	0	0	0	0	0	0	0	0	0	0	0	0	0	0	0	0	0	0
	331	0	0	0	0	0	0	0	0	0	0	0	0	0	0	0	0	0	0	0	0									331	0	0	0	0	0	0	0	0	0	0	0	0	0	0	0	0	0	0	0
	332	0	0	0	0	0	0	0	0	0	0	0	0	0	0	0	0	0	0	0	0									332	0	0	0	0	0	0	0	0	0	0	0	0	0	0	0	0	0	0	0
	333	0	0	0	0	0	0	0	0	0	0	0	0	0	0	0	0	0	0	0	0									333	0	0	0	0	0	0	0	0	0	0	0	0	0	0	0	0	0	0	0
	334	0	0	0	0	0	0	0	0	0	0	0	0	0	0	0	0	0	0	0	0									334	0	0	0	0	0	0	0	0	0	0	0	0	0	0	0	0	0	0	0
	335	0	0	0	0	0	0	0	0	0	0	0	0	0	0	0	0	0	0	0	0									335	0	0	0	0	0	0	0	0	0	0	0	0	0	0	0	0	0	0	0
	336	0	0	0	0	0	0	0	0	0	0	0	0	0	0	0	0	0	0	0	0									336	0	0	0	0	0	0	0	0	0	0	0	0	0	0	0	0	0	0	0
	337	0	0	0	0	0	0	0	0	0	0	0	0	0	0	0	0	0	0	0	0									337	0	0	0	0	0	0	0	0	0	0	0	0	0	0	0	0	0	0	0
	338	0	0	0	0	0	0	0	0	0	0	0	0	0	0	0	0	0	0	0	0									338	0	0	0	0	0	0	0	0	0	0	0	0	0	0	0	0	0	0	0
	339	0	0	0	0	0	0	0	0	0	0	0	0	0	0	0	0	0	0	0	0									339	0	0	0	0	0	0	0	0	0	0	0	0	0	0	0	0	0	0	0
	340	0	0	0	0	0	0	0	0	0	0	0	0	0	0	0	0	0	0	0	0									340	0	0	0	0	0	0	0	0	0	0	0	0	0	0	0	0	0	0	0
	341	0	0	0	0	0	0	0	0	0	0	0	0	0	0	0	0	0	0	0	0									341	0	0	0	0	0	0	0	0	0	0	0	0	0	0	0	0	0	0	0
	342	0	0	0	0	0	0	0	0	0	0	0	0	0	0	0	0	0	0	0	0									342	0	0	0	0	0	0	0	0	0	0	0	0	0	0	0	0	0	0	0
	343	0	0	0	0	0	0	0	0	0	0	0	0	0	0	0	0	0	0	0	0									343	0	0	0	0	0	0	0	0	0	0	0	0	0	0	0	0	0	0	0
	344	0	0	0	0	0	0	0	0	0	0	0	0	0	0	0	0	0	0	0	0									344	0	0	0	0	0	0	0	0	0	0	0	0	0	0	0	0	0	0	0
	345	0	0	0	0	0	0	0	0	0	0	0	0	0	0	0	0	0	0	0	0									345	0	0	0	0	0	0	0	0	0	0	0	0	0	0	0	0	0	0	0
	346	0	0	0	0	0	0	0	0	0	0	0	0	0	0	0	0	0	0	0	0									346	0	0	0	0	0	0	0	0	0	0	0	0	0	0	0	0	0	0	0
	347	0	0	0	0	0	0	0	0	0	0	0	0	0	0	0	0	0	0	0	0									347	0	0	0	0	0	0	0	0	0	0	0	0	0	0	0	0	0	0	0
	348	0	0	0	0	0	0	0	0	0	0	0	0	0	0	0	0	0	0	0	0									348	0	0	0	0	0	0	0	0	0	0	0	0	0	0	0	0	0	0	0
	349	0	0	0	0	0	0	0	0	0	0	0	0	0	0	0	0	0	0	0	0									349	0	0	0	0	0	0	0	0	0	0	0	0	0	0	0	0	0	0	0
	350	0	0	0	0	0	0	0	0	0	0	0	0	0	0	0	0	0	0	0	0									350	0	0	0	0	0	0	0	0	0	0	0	0	0	0	0	0	0	0	0
	351	0	0	0	0	0	0	0	0	0	0	0	0	0	0	0	0	0	0	0	0									351	0	0	0	0	0	0	0	0	0	0	0	0	0	0	0	0	0	0	0
	352	0	0	0	0	0	0	0	0	0	0	0	0	0	0	0	0	0	0	0	0									352	0	0	0	0	0	0	0	0	0	0	0	0	0	0	0	0	0	0	0
	353	0	0	0	0	0	0	0	0	0	0	0	0	0	0	0	0	0	0	0	0									353	0	0	0	0	0	0	0	0	0	0	0	0	0	0	0	0	0	0	0
	354	0	0	0	0	0	0	0	0	0	0	0	0	0	0	0	0	0	0	0	0									354	0	0	0	0	0	0	0	0	0	0	0	0	0	0	0	0	0	0	0
	355	0	0	0	0	0	0	0	0	0	0	0	0	0	0	0	0	0	0	0	0									355	0	0	0	0	0	0	0	0	0	0	0	0	0	0	0	0	0	0	0
	356	0	0	0	0	0	0	0	0	0	0	0	0	0	0	0	0	0	0	0	0									356	0	0	0	0	0	0	0	0	0	0	0	0	0	0	0	0	0	0	0
	357	0	0	0	0	0	0	0	0	0	0	0	0	0	0	0	0	0	0	0	0									357	0	0	0	0	0	0	0	0	0	0	0	0	0	0	0	0	0	0	0
	358	0	0	0	0	0	0	0	0	0	0	0	0	0	0	0	0	0	0	0	0									358	0	0	0	0	0	0	0	0	0	0	0	0	0	0	0	0	0	0	0
	359	0	0	0	0	0	0	0	0	0	0	0	0	0	0	0	0	0	0	0	0									359	0	0	0	0	0	0	0	0	0	0	0	0	0	0	0	0	0	0	0
	360	0	0	0	0	0	0	0	0	0	0	0	0	0	0	0	0	0	0	0	0									360	0	0	0	0	0	0	0	0	0	0	0	0	0	0	0	0	0	0	0
	361	0	0	0	0	0	0	0	0	0	0	0	0	0	0	0	0	0	0	0	0									361	0	0	0	0	0	0	0	0	0	0	0	0	0	0	0	0	0	0	0
	362	0	0	0	0	0	0	0	0	0	0	0	0	0	0	0	0	0	0	0	0									362	0	0	0	0	0	0	0	0	0	0	0	0	0	0	0	0	0	0	0
	363	0	0	0	0	0	0	0	0	0	0	0	0	0	0	0	0	0	0	0	0									363	0	0	0	0	0	0	0	0	0	0	0	0	0	0	0	0	0	0	0
	364	0	0	0	0	0	0	0	0	0	0	0	0	0	0	0	0	0	0	0	0									364	0	0	0	0	0	0	0	0	0	0	0	0	0	0	0	0	0	0	0
	365	0	0	0	0	0	0	0	0	0	0	0	0	0	0	0	0	0	0	0	0									365	0	0	0	0	0	0	0	0	0	0	0	0	0	0	0	0	0	0	0
	366	0	0	0	0	0	0	0	0	0	0	0	0	0	0	0	0	0	0	0	0									366	0	0	0	0	0	0	0	0	0	0	0	0	0	0	0	0	0	0	0
	367	0	0	0	0	0	0	0	0	0	0	0	0	0	0	0	0	0	0	0	0									367	0	0	0	0	0	0	0	0	0	0	0	0	0	0	0	0	0	0	0
	368	0	0	0	0	0	0	0	0	0	0	0	0	0	0	0	0	0	0	0	0									368	0	0	0	0	0	0	0	0	0	0	0	0	0	0	0	0	0	0	0
	369	0	0	0	0	0	0	0	0	0	0	0	0	0	0	0	0	0	0	0	0									369	0	0	0	0	0	0	0	0	0	0	0	0	0	0	0	0	0	0	0
	370	0	0	0	0	0	0	0	0	0	0	0	0	0	0	0	0	0	0	0	0									370	0	0	0	0	0	0	0	0	0	0	0	0	0	0	0	0	0	0	0
	371	0	0	0	0	0	0	0	0	0	0	0	0	0	0	0	0	0	0	0	0									371	0	0	0	0	0	0	0	0	0	0	0	0	0	0	0	0	0	0	0
	372	0	0	0	0	0	0	0	0	0	0	0	0	0	0	0	0	0	0	0	0									372	0	0	0	0	0	0	0	0	0	0	0	0	0	0	0	0	0	0	0
	373	0	0	0	0	0	0	0	0	0	0	0	0	0	0	0	0	0	0	0	0									373	0	0	0	0	0	0	0	0	0	0	0	0	0	0	0	0	0	0	0
	374	0	0	0	0	0	0	0	0	0	0	0	0	0	0	0	0	0	0	0	0									374	0	0	0	0	0	0	0	0	0	0	0	0	0	0	0	0	0	0	0
	375	0	0	0	0	0	0	0	0	0	0	0	0	0	0	0	0	0	0	0	0									375	0	0	0	0	0	0	0	0	0	0	0	0	0	0	0	0	0	0	0
	376	0	0	0	0	0	0	0	0	0	0	0	0	0	0	0	0	0	0	0	0									376	0	0	0	0	0	0	0	0	0	0	0	0	0	0	0	0	0	0	0
	377	0	0	0	0	0	0	0	0	0	0	0	0	0	0	0	0	0	0	0	0									377	0	0	0	0	0	0	0	0	0	0	0	0	0	0	0	0	0	0	0
	378	0	0	0	0	0	0	0	0	0	0	0	0	0	0	0	0	0	0	0	0									378	0	0	0	0	0	0	0	0	0	0	0	0	0	0	0	0	0	0	0
	379	0	0	0	0	0	0	0	0	0	0	0	0	0	0	0	0	0	0	0	0									379	0	0	0	0	0	0	0	0	0	0	0	0	0	0	0	0	0	0	0
	380	0	0	0	0	0	0	0	0	0	0	0	0	0	0	0	0	0	0	0	0									380	0	0	0	0	0	0	0	0	0	0	0	0	0	0	0	0	0	0	0
	381	0	0	0	0	0	0	0	0	0	0	0	0	0	0	0	0	0	0	0	0									381	0	0	0	0	0	0	0	0	0	0	0	0	0	0	0	0	0	0	0
	382	0	0	0	0	0	0	0	0	0	0	0	0	0	0	0	0	0	0	0	0									382	0	0	0	0	0	0	0	0	0	0	0	0	0	0	0	0	0	0	0
	383	0	0	0	0	0	0	0	0	0	0	0	0	0	0	0	0	0	0	0	0									383	0	0	0	0	0	0	0	0	0	0	0	0	0	0	0	0	0	0	0
	384	0	0	0	0	0	0	0	0	0	0	0	0	0	0	0	0	0	0	0	0									384	0	0	0	0	0	0	0	0	0	0	0	0	0	0	0	0	0	0	0
	385	0	0	0	0	0	0	0	0	0	0	0	0	0	0	0	0	0	0	0	0									385	0	0	0	0	0	0	0	0	0	0	0	0	0	0	0	0	0	0	0
	386	0	0	0	0	0	0	0	0	0	0	0	0	0	0	0	0	0	0	0	0									386	0	0	0	0	0	0	0	0	0	0	0	0	0	0	0	0	0	0	0
	387	0	0	0	0	0	0	0	0	0	0	0	0	0	0	0	0	0	0	0	0									387	0	0	0	0	0	0	0	0	0	0	0	0	0	0	0	0	0	0	0
	388	0	0	0	0	0	0	0	0	0	0	0	0	0	0	0	0	0	0	0	0									388	0	0	0	0	0	0	0	0	0	0	0	0	0	0	0	0	0	0	0
	389	0	0	0	0	0	0	0	0	0	0	0	0	0	0	0	0	0	0	0	0									389	0	0	0	0	0	0	0	0	0	0	0	0	0	0	0	0	0	0	0
	390	0	0	0	0	0	0	0	0	0	0	0	0	0	0	0	0	0	0	0	0									390	0	0	0	0	0	0	0	0	0	0	0	0	0	0	0	0	0	0	0
	391	0	0	0	0	0	0	0	0	0	0	0	0	0	0	0	0	0	0	0	0									391	0	0	0	0	0	0	0	0	0	0	0	0	0	0	0	0	0	0	0
	392	0	0	0	0	0	0	0	0	0	0	0	0	0	0	0	0	0	0	0	0									392	0	0	0	0	0	0	0	0	0	0	0	0	0	0	0	0	0	0	0
	393	0	0	0	0	0	0	0	0	0	0	0	0	0	0	0	0	0	0	0	0									393	0	0	0	0	0	0	0	0	0	0	0	0	0	0	0	0	0	0	0
	394	0	0	0	0	0	0	0	0	0	0	0	0	0	0	0	0	0	0	0	0									394	0	0	0	0	0	0	0	0	0	0	0	0	0	0	0	0	0	0	0
	395	0	0	0	0	0	0	0	0	0	0	0	0	0	0	0	0	0	0	0	0									395	0	0	0	0	0	0	0	0	0	0	0	0	0	0	0	0	0	0	0
	396	0	0	0	0	0	0	0	0	0	0	0	0	0	0	0	0	0	0	0	0									396	0	0	0	0	0	0	0	0	0	0	0	0	0	0	0	0	0	0	0
	397	0	0	0	0	0	0	0	0	0	0	0	0	0	0	0	0	0	0	0	0									397	0	0	0	0	0	0	0	0	0	0	0	0	0	0	0	0	0	0	0
	398	0	0	0	0	0	0	0	0	0	0	0	0	0	0	0	0	0	0	0	0									398	0	0	0	0	0	0	0	0	0	0	0	0	0	0	0	0	0	0	0
	399	0	0	0	0	0	0	0	0	0	0	0	0	0	0	0	0	0	0	0	0									399	0	0	0	0	0	0	0	0	0	0	0	0	0	0	0	0	0	0	0
	400	0	0	0	0	0	0	0	0	0	0	0	0	0	0	0	0	0	0	0	0									400	0	0	0	0	0	0	0	0	0	0	0	0	0	0	0	0	0	0	0
	401	0	0	0	0	0	0	0	0	0	0	0	0	0	0	0	0	0	0	0	0									401	0	0	0	0	0	0	0	0	0	0	0	0	0	0	0	0	0	0	0
	402	0	0	0	0	0	0	0	0	0	0	0	0	0	0	0	0	0	0	0	0									402	0	0	0	0	0	0	0	0	0	0	0	0	0	0	0	0	0	0	0
	403	0	0	0	0	0	0	0	0	0	0	0	0	0	0	0	0	0	0	0	0									403	0	0	0	0	0	0	0	0	0	0	0	0	0	0	0	0	0	0	0
	404	0	0	0	0	0	0	0	0	0	0	0	0	0	0	0	0	0	0	0	0									404	0	0	0	0	0	0	0	0	0	0	0	0	0	0	0	0	0	0	0
	405	0	0	0	0	0	0	0	0	0	0	0	0	0	0	0	0	0	0	0	0									405	0	0	0	0	0	0	0	0	0	0	0	0	0	0	0	0	0	0	0
	406	0	0	0	0	0	0	0	0	0	0	0	0	0	0	0	0	0	0	0	0									406	0	0	0	0	0	0	0	0	0	0	0	0	0	0	0	0	0	0	0
	407	0	0	0	0	0	0	0	0	0	0	0	0	0	0	0	0	0	0	0	0									407	0	0	0	0	0	0	0	0	0	0	0	0	0	0	0	0	0	0	0
	408	0	0	0	0	0	0	0	0	0	0	0	0	0	0	0	0	0	0	0	0									408	0	0	0	0	0	0	0	0	0	0	0	0	0	0	0	0	0	0	0
	409	0	0	0	0	0	0	0	0	0	0	0	0	0	0	0	0	0	0	0	0									409	0	0	0	0	0	0	0	0	0	0	0	0	0	0	0	0	0	0	0
	410	0	0	0	0	0	0	0	0	0	0	0	0	0	0	0	0	0	0	0	0									410	0	0	0	0	0	0	0	0	0	0	0	0	0	0	0	0	0	0	0
	411	0	0	0	0	0	0	0	0	0	0	0	0	0	0	0	0	0	0	0	0									411	0	0	0	0	0	0	0	0	0	0	0	0	0	0	0	0	0	0	0
	412	0	0	0	0	0	0	0	0	0	0	0	0	0	0	0	0	0	0	0	0									412	0	0	0	0	0	0	0	0	0	0	0	0	0	0	0	0	0	0	0
	413	0	0	0	0	0	0	0	0	0	0	0	0	0	0	0	0	0	0	0	0									413	0	0	0	0	0	0	0	0	0	0	0	0	0	0	0	0	0	0	0
	414	0	0	0	0	0	0	0	0	0	0	0	0	0	0	0	0	0	0	0	0									414	0	0	0	0	0	0	0	0	0	0	0	0	0	0	0	0	0	0	0
	415	0	0	0	0	0	0	0	0	0	0	0	0	0	0	0	0	0	0	0	0									415	0	0	0	0	0	0	0	0	0	0	0	0	0	0	0	0	0	0	0
	416	0	0	0	0	0	0	0	0	0	0	0	0	0	0	0	0	0	0	0	0									416	0	0	0	0	0	0	0	0	0	0	0	0	0	0	0	0	0	0	0
	417	0	0	0	0	0	0	0	0	0	0	0	0	0	0	0	0	0	0	0	0									417	0	0	0	0	0	0	0	0	0	0	0	0	0	0	0	0	0	0	0
	418	0	0	0	0	0	0	0	0	0	0	0	0	0	0	0	0	0	0	0	0									418	0	0	0	0	0	0	0	0	0	0	0	0	0	0	0	0	0	0	0
	419	0	0	0	0	0	0	0	0	0	0	0	0	0	0	0	0	0	0	0	0									419	0	0	0	0	0	0	0	0	0	0	0	0	0	0	0	0	0	0	0
	420	0	0	0	0	0	0	0	0	0	0	0	0	0	0	0	0	0	0	0	0									420	0	0	0	0	0	0	0	0	0	0	0	0	0	0	0	0	0	0	0
	421	0	0	0	0	0	0	0	0	0	0	0	0	0	0	0	0	0	0	0	0									421	0	0	0	0	0	0	0	0	0	0	0	0	0	0	0	0	0	0	0
	422	0	0	0	0	0	0	0	0	0	0	0	0	0	0	0	0	0	0	0	0									422	0	0	0	0	0	0	0	0	0	0	0	0	0	0	0	0	0	0	0
	423	0	0	0	0	0	0	0	0	0	0	0	0	0	0	0	0	0	0	0	0									423	0	0	0	0	0	0	0	0	0	0	0	0	0	0	0	0	0	0	0
	424	0	0	0	0	0	0	0	0	0	0	0	0	0	0	0	0	0	0	0	0									424	0	0	0	0	0	0	0	0	0	0	0	0	0	0	0	0	0	0	0
	425	0	0	0	0	0	0	0	0	0	0	0	0	0	0	0	0	0	0	0	0									425	0	0	0	0	0	0	0	0	0	0	0	0	0	0	0	0	0	0	0
	426	0	0	0	0	0	0	0	0	0	0	0	0	0	0	0	0	0	0	0	0									426	0	0	0	0	0	0	0	0	0	0	0	0	0	0	0	0	0	0	0
	427	0	0	0	0	0	0	0	0	0	0	0	0	0	0	0	0	0	0	0	0									427	0	0	0	0	0	0	0	0	0	0	0	0	0	0	0	0	0	0	0
	428	0	0	0	0	0	0	0	0	0	0	0	0	0	0	0	0	0	0	0	0									428	0	0	0	0	0	0	0	0	0	0	0	0	0	0	0	0	0	0	0
	429	0	0	0	0	0	0	0	0	0	0	0	0	0	0	0	0	0	0	0	0									429	0	0	0	0	0	0	0	0	0	0	0	0	0	0	0	0	0	0	0
	430	0	0	0	0	0	0	0	0	0	0	0	0	0	0	0	0	0	0	0	0									430	0	0	0	0	0	0	0	0	0	0	0	0	0	0	0	0	0	0	0
	431	0	0	0	0	0	0	0	0	0	0	0	0	0	0	0	0	0	0	0	0									431	0	0	0	0	0	0	0	0	0	0	0	0	0	0	0	0	0	0	0
	432	0	0	0	0	0	0	0	0	0	0	0	0	0	0	0	0	0	0	0	0									432	0	0	0	0	0	0	0	0	0	0	0	0	0	0	0	0	0	0	0
	433	0	0	0	0	0	0	0	0	0	0	0	0	0	0	0	0	0	0	0	0									433	0	0	0	0	0	0	0	0	0	0	0	0	0	0	0	0	0	0	0
	434	0	0	0	0	0	0	0	0	0	0	0	0	0	0	0	0	0	0	0	0									434	0	0	0	0	0	0	0	0	0	0	0	0	0	0	0	0	0	0	0
	435	0	0	0	0	0	0	0	0	0	0	0	0	0	0	0	0	0	0	0	0									435	0	0	0	0	0	0	0	0	0	0	0	0	0	0	0	0	0	0	0
	436	0	0	0	0	0	0	0	0	0	0	0	0	0	0	0	0	0	0	0	0									436	0	0	0	0	0	0	0	0	0	0	0	0	0	0	0	0	0	0	0
	437	0	0	0	0	0	0	0	0	0	0	0	0	0	0	0	0	0	0	0	0									437	0	0	0	0	0	0	0	0	0	0	0	0	0	0	0	0	0	0	0
	438	0	0	0	0	0	0	0	0	0	0	0	0	0	0	0	0	0	0	0	0									438	0	0	0	0	0	0	0	0	0	0	0	0	0	0	0	0	0	0	0
	439	0	0	0	0	0	0	0	0	0	0	0	0	0	0	0	0	0	0	0	0									439	0	0	0	0	0	0	0	0	0	0	0	0	0	0	0	0	0	0	0
	440	0	0	0	0	0	0	0	0	0	0	0	0	0	0	0	0	0	0	0	0									440	0	0	0	0	0	0	0	0	0	0	0	0	0	0	0	0	0	0	0
	441	0	0	0	0	0	0	0	0	0	0	0	0	0	0	0	0	0	0	0	0									441	0	0	0	0	0	0	0	0	0	0	0	0	0	0	0	0	0	0	0
	442	0	0	0	0	0	0	0	0	0	0	0	0	0	0	0	0	0	0	0	0									442	0	0	0	0	0	0	0	0	0	0	0	0	0	0	0	0	0	0	0
	443	0	0	0	0	0	0	0	0	0	0	0	0	0	0	0	0	0	0	0	0									443	0	0	0	0	0	0	0	0	0	0	0	0	0	0	0	0	0	0	0
	444	0	0	0	0	0	0	0	0	0	0	0	0	0	0	0	0	0	0	0	0									444	0	0	0	0	0	0	0	0	0	0	0	0	0	0	0	0	0	0	0
	445	0	0	0	0	0	0	0	0	0	0	0	0	0	0	0	0	0	0	0	0									445	0	0	0	0	0	0	0	0	0	0	0	0	0	0	0	0	0	0	0
	446	0	0	0	0	0	0	0	0	0	0	0	0	0	0	0	0	0	0	0	0									446	0	0	0	0	0	0	0	0	0	0	0	0	0	0	0	0	0	0	0
	447	0	0	0	0	0	0	0	0	0	0	0	0	0	0	0	0	0	0	0	0									447	0	0	0	0	0	0	0	0	0	0	0	0	0	0	0	0	0	0	0
	448	0	0	0	0	0	0	0	0	0	0	0	0	0	0	0	0	0	0	0	0									448	0	0	0	0	0	0	0	0	0	0	0	0	0	0	0	0	0	0	0
	449	0	0	0	0	0	0	0	0	0	0	0	0	0	0	0	0	0	0	0	0									449	0	0	0	0	0	0	0	0	0	0	0	0	0	0	0	0	0	0	0
	450	0	0	0	0	0	0	0	0	0	0	0	0	0	0	0	0	0	0	0	0									450	0	0	0	0	0	0	0	0	0	0	0	0	0	0	0	0	0	0	0
	451	0	0	0	0	0	0	0	0	0	0	0	0	0	0	0	0	0	0	0	0									451	0	0	0	0	0	0	0	0	0	0	0	0	0	0	0	0	0	0	0
	452	0	0	0	0	0	0	0	0	0	0	0	0	0	0	0	0	0	0	0	0									452	0	0	0	0	0	0	0	0	0	0	0	0	0	0	0	0	0	0	0
	453	0	0	0	0	0	0	0	0	0	0	0	0	0	0	0	0	0	0	0	0									453	0	0	0	0	0	0	0	0	0	0	0	0	0	0	0	0	0	0	0
	454	0	0	0	0	0	0	0	0	0	0	0	0	0	0	0	0	0	0	0	0									454	0	0	0	0	0	0	0	0	0	0	0	0	0	0	0	0	0	0	0
	455	0	0	0	0	0	0	0	0	0	0	0	0	0	0	0	0	0	0	0	0									455	0	0	0	0	0	0	0	0	0	0	0	0	0	0	0	0	0	0	0
	456	0	0	0	0	0	0	0	0	0	0	0	0	0	0	0	0	0	0	0	0									456	0	0	0	0	0	0	0	0	0	0	0	0	0	0	0	0	0	0	0
	457	0	0	0	0	0	0	0	0	0	0	0	0	0	0	0	0	0	0	0	0									457	0	0	0	0	0	0	0	0	0	0	0	0	0	0	0	0	0	0	0
	458	0	0	0	0	0	0	0	0	0	0	0	0	0	0	0	0	0	0	0	0									458	0	0	0	0	0	0	0	0	0	0	0	0	0	0	0	0	0	0	0
	459	0	0	0	0	0	0	0	0	0	0	0	0	0	0	0	0	0	0	0	0									459	0	0	0	0	0	0	0	0	0	0	0	0	0	0	0	0	0	0	0
	460	0	0	0	0	0	0	0	0	0	0	0	0	0	0	0	0	0	0	0	0									460	0	0	0	0	0	0	0	0	0	0	0	0	0	0	0	0	0	0	0
	461	0	0	0	0	0	0	0	0	0	0	0	0	0	0	0	0	0	0	0	0									461	0	0	0	0	0	0	0	0	0	0	0	0	0	0	0	0	0	0	0
	462	0	0	0	0	0	0	0	0	0	0	0	0	0	0	0	0	0	0	0	0									462	0	0	0	0	0	0	0	0	0	0	0	0	0	0	0	0	0	0	0
	463	0	0	0	0	0	0	0	0	0	0	0	0	0	0	0	0	0	0	0	0									463	0	0	0	0	0	0	0	0	0	0	0	0	0	0	0	0	0	0	0
	464	0	0	0	0	0	0	0	0	0	0	0	0	0	0	0	0	0	0	0	0									464	0	0	0	0	0	0	0	0	0	0	0	0	0	0	0	0	0	0	0
	465	0	0	0	0	0	0	0	0	0	0	0	0	0	0	0	0	0	0	0	0									465	0	0	0	0	0	0	0	0	0	0	0	0	0	0	0	0	0	0	0
	466	0	0	0	0	0	0	0	0	0	0	0	0	0	0	0	0	0	0	0	0									466	0	0	0	0	0	0	0	0	0	0	0	0	0	0	0	0	0	0	0
	467	0	0	0	0	0	0	0	0	0	0	0	0	0	0	0	0	0	0	0	0									467	0	0	0	0	0	0	0	0	0	0	0	0	0	0	0	0	0	0	0
	468	0	0	0	0	0	0	0	0	0	0	0	0	0	0	0	0	0	0	0	0									468	0	0	0	0	0	0	0	0	0	0	0	0	0	0	0	0	0	0	0
	469	0	0	0	0	0	0	0	0	0	0	0	0	0	0	0	0	0	0	0	0									469	0	0	0	0	0	0	0	0	0	0	0	0	0	0	0	0	0	0	0
	470	0	0	0	0	0	0	0	0	0	0	0	0	0	0	0	0	0	0	0	0									470	0	0	0	0	0	0	0	0	0	0	0	0	0	0	0	0	0	0	0
	471	0	0	0	0	0	0	0	0	0	0	0	0	0	0	0	0	0	0	0	0									471	0	0	0	0	0	0	0	0	0	0	0	0	0	0	0	0	0	0	0
	472	0	0	0	0	0	0	0	0	0	0	0	0	0	0	0	0	0	0	0	0									472	0	0	0	0	0	0	0	0	0	0	0	0	0	0	0	0	0	0	0
	473	0	0	0	0	0	0	0	0	0	0	0	0	0	0	0	0	0	0	0	0									473	0	0	0	0	0	0	0	0	0	0	0	0	0	0	0	0	0	0	0
	474	0	0	0	0	0	0	0	0	0	0	0	0	0	0	0	0	0	0	0	0									474	0	0	0	0	0	0	0	0	0	0	0	0	0	0	0	0	0	0	0
	475	0	0	0	0	0	0	0	0	0	0	0	0	0	0	0	0	0	0	0	0									475	0	0	0	0	0	0	0	0	0	0	0	0	0	0	0	0	0	0	0
	476	0	0	0	0	0	0	0	0	0	0	0	0	0	0	0	0	0	0	0	0									476	0	0	0	0	0	0	0	0	0	0	0	0	0	0	0	0	0	0	0
	477	0	0	0	0	0	0	0	0	0	0	0	0	0	0	0	0	0	0	0	0									477	0	0	0	0	0	0	0	0	0	0	0	0	0	0	0	0	0	0	0
	478	0	0	0	0	0	0	0	0	0	0	0	0	0	0	0	0	0	0	0	0									478	0	0	0	0	0	0	0	0	0	0	0	0	0	0	0	0	0	0	0
	479	0	0	0	0	0	0	0	0	0	0	0	0	0	0	0	0	0	0	0	0									479	0	0	0	0	0	0	0	0	0	0	0	0	0	0	0	0	0	0	0
	480	0	0	0	0	0	0	0	0	0	0	0	0	0	0	0	0	0	0	0	0									480	0	0	0	0	0	0	0	0	0	0	0	0	0	0	0	0	0	0	0
	481	0	0	0	0	0	0	0	0	0	0	0	0	0	0	0	0	0	0	0	0									481	0	0	0	0	0	0	0	0	0	0	0	0	0	0	0	0	0	0	0
	482	0	0	0	0	0	0	0	0	0	0	0	0	0	0	0	0	0	0	0	0									482	0	0	0	0	0	0	0	0	0	0	0	0	0	0	0	0	0	0	0
	483	0	0	0	0	0	0	0	0	0	0	0	0	0	0	0	0	0	0	0	0									483	0	0	0	0	0	0	0	0	0	0	0	0	0	0	0	0	0	0	0
	484	0	0	0	0	0	0	0	0	0	0	0	0	0	0	0	0	0	0	0	0									484	0	0	0	0	0	0	0	0	0	0	0	0	0	0	0	0	0	0	0
	485	0	0	0	0	0	0	0	0	0	0	0	0	0	0	0	0	0	0	0	0									485	0	0	0	0	0	0	0	0	0	0	0	0	0	0	0	0	0	0	0
	486	0	0	0	0	0	0	0	0	0	0	0	0	0	0	0	0	0	0	0	0									486	0	0	0	0	0	0	0	0	0	0	0	0	0	0	0	0	0	0	0
	487	0	0	0	0	0	0	0	0	0	0	0	0	0	0	0	0	0	0	0	0									487	0	0	0	0	0	0	0	0	0	0	0	0	0	0	0	0	0	0	0
	488	0	0	0	0	0	0	0	0	0	0	0	0	0	0	0	0	0	0	0	0									488	0	0	0	0	0	0	0	0	0	0	0	0	0	0	0	0	0	0	0
	489	0	0	0	0	0	0	0	0	0	0	0	0	0	0	0	0	0	0	0	0									489	0	0	0	0	0	0	0	0	0	0	0	0	0	0	0	0	0	0	0
	490	0	0	0	0	0	0	0	0	0	0	0	0	0	0	0	0	0	0	0	0									490	0	0	0	0	0	0	0	0	0	0	0	0	0	0	0	0	0	0	0
	491	0	0	0	0	0	0	0	0	0	0	0	0	0	0	0	0	0	0	0	0									491	0	0	0	0	0	0	0	0	0	0	0	0	0	0	0	0	0	0	0
	492	0	0	0	0	0	0	0	0	0	0	0	0	0	0	0	0	0	0	0	0									492	0	0	0	0	0	0	0	0	0	0	0	0	0	0	0	0	0	0	0
	493	0	0	0	0	0	0	0	0	0	0	0	0	0	0	0	0	0	0	0	0									493	0	0	0	0	0	0	0	0	0	0	0	0	0	0	0	0	0	0	0
	494	0	0	0	0	0	0	0	0	0	0	0	0	0	0	0	0	0	0	0	0									494	0	0	0	0	0	0	0	0	0	0	0	0	0	0	0	0	0	0	0
	495	0	0	0	0	0	0	0	0	0	0	0	0	0	0	0	0	0	0	0	0									495	0	0	0	0	0	0	0	0	0	0	0	0	0	0	0	0	0	0	0
	496	0	0	0	0	0	0	0	0	0	0	0	0	0	0	0	0	0	0	0	0									496	0	0	0	0	0	0	0	0	0	0	0	0	0	0	0	0	0	0	0
	497	0	0	0	0	0	0	0	0	0	0	0	0	0	0	0	0	0	0	0	0									497	0	0	0	0	0	0	0	0	0	0	0	0	0	0	0	0	0	0	0
	498	0	0	0	0	0	0	0	0	0	0	0	0	0	0	0	0	0	0	0	0									498	0	0	0	0	0	0	0	0	0	0	0	0	0	0	0	0	0	0	0
	499	0	0	0	0	0	0	0	0	0	0	0	0	0	0	0	0	0	0	0	0									499	0	0	0	0	0	0	0	0	0	0	0	0	0	0	0	0	0	0	0
	500	0	0	0	0	0	0	0	0	0	0	0	0	0	0	0	0	0	0	0	0									500	0	0	0	0	0	0	0	0	0	0	0	0	0	0	0	0	0	0	0
	501	0	0	0	0	0	0	0	0	0	0	0	0	0	0	0	0	0	0	0	0									501	0	0	0	0	0	0	0	0	0	0	0	0	0	0	0	0	0	0	0
	502	0	0	0	0	0	0	0	0	0	0	0	0	0	0	0	0	0	0	0	0									502	0	0	0	0	0	0	0	0	0	0	0	0	0	0	0	0	0	0	0
	503	0	0	0	0	0	0	0	0	0	0	0	0	0	0	0	0	0	0	0	0									503	0	0	0	0	0	0	0	0	0	0	0	0	0	0	0	0	0	0	0
	504	0	0	0	0	0	0	0	0	0	0	0	0	0	0	0	0	0	0	0	0									504	0	0	0	0	0	0	0	0	0	0	0	0	0	0	0	0	0	0	0
	505	0	0	0	0	0	0	0	0	0	0	0	0	0	0	0	0	0	0	0	0									505	0	0	0	0	0	0	0	0	0	0	0	0	0	0	0	0	0	0	0
	506	0	0	0	0	0	0	0	0	0	0	0	0	0	0	0	0	0	0	0	0									506	0	0	0	0	0	0	0	0	0	0	0	0	0	0	0	0	0	0	0
	507	0	0	0	0	0	0	0	0	0	0	0	0	0	0	0	0	0	0	0	0									507	0	0	0	0	0	0	0	0	0	0	0	0	0	0	0	0	0	0	0
	508	0	0	0	0	0	0	0	0	0	0	0	0	0	0	0	0	0	0	0	0									508	0	0	0	0	0	0	0	0	0	0	0	0	0	0	0	0	0	0	0
	509	0	0	0	0	0	0	0	0	0	0	0	0	0	0	0	0	0	0	0	0									509	0	0	0	0	0	0	0	0	0	0	0	0	0	0	0	0	0	0	0
	510	0	0	0	0	0	0	0	0	0	0	0	0	0	0	0	0	0	0	0	0									510	0	0	0	0	0	0	0	0	0	0	0	0	0	0	0	0	0	0	0
	511	0	0	0	0	0	0	0	0	0	0	0	0	0	0	0	0	0	0	0	0									511	0	0	0	0	0	0	0	0	0	0	0	0	0	0	0	0	0	0	0
	512	0	0	0	0	0	0	0	0	0	0	0	0	0	0	0	0	0	0	0	0									512	0	0	0	0	0	0	0	0	0	0	0	0	0	0	0	0	0	0	0
	513	0	0	0	0	0	0	0	0	0	0	0	0	0	0	0	0	0	0	0	0									513	0	0	0	0	0	0	0	0	0	0	0	0	0	0	0	0	0	0	0
	514	0	0	0	0	0	0	0	0	0	0	0	0	0	0	0	0	0	0	0	0									514	0	0	0	0	0	0	0	0	0	0	0	0	0	0	0	0	0	0	0
	515	0	0	0	0	0	0	0	0	0	0	0	0	0	0	0	0	0	0	0	0									515	0	0	0	0	0	0	0	0	0	0	0	0	0	0	0	0	0	0	0
	516	0	0	0	0	0	0	0	0	0	0	0	0	0	0	0	0	0	0	0	0									516	0	0	0	0	0	0	0	0	0	0	0	0	0	0	0	0	0	0	0
	517	0	0	0	0	0	0	0	0	0	0	0	0	0	0	0	0	0	0	0	0									517	0	0	0	0	0	0	0	0	0	0	0	0	0	0	0	0	0	0	0
	518	0	0	0	0	0	0	0	0	0	0	0	0	0	0	0	0	0	0	0	0									518	0	0	0	0	0	0	0	0	0	0	0	0	0	0	0	0	0	0	0
	519	0	0	0	0	0	0	0	0	0	0	0	0	0	0	0	0	0	0	0	0									519	0	0	0	0	0	0	0	0	0	0	0	0	0	0	0	0	0	0	0
	520	0	0	0	0	0	0	0	0	0	0	0	0	0	0	0	0	0	0	0	0									520	0	0	0	0	0	0	0	0	0	0	0	0	0	0	0	0	0	0	0
	521	0	0	0	0	0	0	0	0	0	0	0	0	0	0	0	0	0	0	0	0									521	0	0	0	0	0	0	0	0	0	0	0	0	0	0	0	0	0	0	0
	522	0	0	0	0	0	0	0	0	0	0	0	0	0	0	0	0	0	0	0	0									522	0	0	0	0	0	0	0	0	0	0	0	0	0	0	0	0	0	0	0
	523	0	0	0	0	0	0	0	0	0	0	0	0	0	0	0	0	0	0	0	0									523	0	0	0	0	0	0	0	0	0	0	0	0	0	0	0	0	0	0	0
	524	0	0	0	0	0	0	0	0	0	0	0	0	0	0	0	0	0	0	0	0									524	0	0	0	0	0	0	0	0	0	0	0	0	0	0	0	0	0	0	0
	525	0	0	0	0	0	0	0	0	0	0	0	0	0	0	0	0	0	0	0	0									525	0	0	0	0	0	0	0	0	0	0	0	0	0	0	0	0	0	0	0
	526	0	0	0	0	0	0	0	0	0	0	0	0	0	0	0	0	0	0	0	0									526	0	0	0	0	0	0	0	0	0	0	0	0	0	0	0	0	0	0	0
	527	0	0	0	0	0	0	0	0	0	0	0	0	0	0	0	0	0	0	0	0									527	0	0	0	0	0	0	0	0	0	0	0	0	0	0	0	0	0	0	0
	528	0	0	0	0	0	0	0	0	0	0	0	0	0	0	0	0	0	0	0	0									528	0	0	0	0	0	0	0	0	0	0	0	0	0	0	0	0	0	0	0
	529	0	0	0	0	0	0	0	0	0	0	0	0	0	0	0	0	0	0	0	0									529	0	0	0	0	0	0	0	0	0	0	0	0	0	0	0	0	0	0	0
	530	0	0	0	0	0	0	0	0	0	0	0	0	0	0	0	0	0	0	0	0									530	0	0	0	0	0	0	0	0	0	0	0	0	0	0	0	0	0	0	0
	531	0	0	0	0	0	0	0	0	0	0	0	0	0	0	0	0	0	0	0	0									531	0	0	0	0	0	0	0	0	0	0	0	0	0	0	0	0	0	0	0
	532	0	0	0	0	0	0	0	0	0	0	0	0	0	0	0	0	0	0	0	0									532	0	0	0	0	0	0	0	0	0	0	0	0	0	0	0	0	0	0	0
	533	0	0	0	0	0	0	0	0	0	0	0	0	0	0	0	0	0	0	0	0									533	0	0	0	0	0	0	0	0	0	0	0	0	0	0	0	0	0	0	0
	534	0	0	0	0	0	0	0	0	0	0	0	0	0	0	0	0	0	0	0	0									534	0	0	0	0	0	0	0	0	0	0	0	0	0	0	0	0	0	0	0
	535	0	0	0	0	0	0	0	0	0	0	0	0	0	0	0	0	0	0	0	0									535	0	0	0	0	0	0	0	0	0	0	0	0	0	0	0	0	0	0	0
	536	0	0	0	0	0	0	0	0	0	0	0	0	0	0	0	0	0	0	0	0									536	0	0	0	0	0	0	0	0	0	0	0	0	0	0	0	0	0	0	0
	537	0	0	0	0	0	0	0	0	0	0	0	0	0	0	0	0	0	0	0	0									537	0	0	0	0	0	0	0	0	0	0	0	0	0	0	0	0	0	0	0
	538	0	0	0	0	0	0	0	0	0	0	0	0	0	0	0	0	0	0	0	0									538	0	0	0	0	0	0	0	0	0	0	0	0	0	0	0	0	0	0	0
	539	0	0	0	0	0	0	0	0	0	0	0	0	0	0	0	0	0	0	0	0									539	0	0	0	0	0	0	0	0	0	0	0	0	0	0	0	0	0	0	0
	540	0	0	0	0	0	0	0	0	0	0	0	0	0	0	0	0	0	0	0	0									540	0	0	0	0	0	0	0	0	0	0	0	0	0	0	0	0	0	0	0
	541	0	0	0	0	0	0	0	0	0	0	0	0	0	0	0	0	0	0	0	0									541	0	0	0	0	0	0	0	0	0	0	0	0	0	0	0	0	0	0	0
	542	0	0	0	0	0	0	0	0	0	0	0	0	0	0	0	0	0	0	0	0									542	0	0	0	0	0	0	0	0	0	0	0	0	0	0	0	0	0	0	0
	543	0	0	0	0	0	0	0	0	0	0	0	0	0	0	0	0	0	0	0	0									543	0	0	0	0	0	0	0	0	0	0	0	0	0	0	0	0	0	0	0
	544	0	0	0	0	0	0	0	0	0	0	0	0	0	0	0	0	0	0	0	0									544	0	0	0	0	0	0	0	0	0	0	0	0	0	0	0	0	0	0	0
	545	0	0	0	0	0	0	0	0	0	0	0	0	0	0	0	0	0	0	0	0									545	0	0	0	0	0	0	0	0	0	0	0	0	0	0	0	0	0	0	0
	546	0	0	0	0	0	0	0	0	0	0	0	0	0	0	0	0	0	0	0	0									546	0	0	0	0	0	0	0	0	0	0	0	0	0	0	0	0	0	0	0
	547	0	0	0	0	0	0	0	0	0	0	0	0	0	0	0	0	0	0	0	0									547	0	0	0	0	0	0	0	0	0	0	0	0	0	0	0	0	0	0	0
	548	0	0	0	0	0	0	0	0	0	0	0	0	0	0	0	0	0	0	0	0									548	0	0	0	0	0	0	0	0	0	0	0	0	0	0	0	0	0	0	0
	549	0	0	0	0	0	0	0	0	0	0	0	0	0	0	0	0	0	0	0	0									549	0	0	0	0	0	0	0	0	0	0	0	0	0	0	0	0	0	0	0
	550	0	0	0	0	0	0	0	0	0	0	0	0	0	0	0	0	0	0	0	0									550	0	0	0	0	0	0	0	0	0	0	0	0	0	0	0	0	0	0	0
	551	0	0	0	0	0	0	0	0	0	0	0	0	0	0	0	0	0	0	0	0									551	0	0	0	0	0	0	0	0	0	0	0	0	0	0	0	0	0	0	0
	552	0	0	0	0	0	0	0	0	0	0	0	0	0	0	0	0	0	0	0	0									552	0	0	0	0	0	0	0	0	0	0	0	0	0	0	0	0	0	0	0
	553	0	0	0	0	0	0	0	0	0	0	0	0	0	0	0	0	0	0	0	0									553	0	0	0	0	0	0	0	0	0	0	0	0	0	0	0	0	0	0	0
	554	0	0	0	0	0	0	0	0	0	0	0	0	0	0	0	0	0	0	0	0									554	0	0	0	0	0	0	0	0	0	0	0	0	0	0	0	0	0	0	0
	555	0	0	0	0	0	0	0	0	0	0	0	0	0	0	0	0	0	0	0	0									555	0	0	0	0	0	0	0	0	0	0	0	0	0	0	0	0	0	0	0
	556	0	0	0	0	0	0	0	0	0	0	0	0	0	0	0	0	0	0	0	0									556	0	0	0	0	0	0	0	0	0	0	0	0	0	0	0	0	0	0	0
	557	0	0	0	0	0	0	0	0	0	0	0	0	0	0	0	0	0	0	0	0									557	0	0	0	0	0	0	0	0	0	0	0	0	0	0	0	0	0	0	0
	558	0	0	0	0	0	0	0	0	0	0	0	0	0	0	0	0	0	0	0	0									558	0	0	0	0	0	0	0	0	0	0	0	0	0	0	0	0	0	0	0
	559	0	0	0	0	0	0	0	0	0	0	0	0	0	0	0	0	0	0	0	0									559	0	0	0	0	0	0	0	0	0	0	0	0	0	0	0	0	0	0	0
	560	0	0	0	0	0	0	0	0	0	0	0	0	0	0	0	0	0	0	0	0									560	0	0	0	0	0	0	0	0	0	0	0	0	0	0	0	0	0	0	0
	561	0	0	0	0	0	0	0	0	0	0	0	0	0	0	0	0	0	0	0	0									561	0	0	0	0	0	0	0	0	0	0	0	0	0	0	0	0	0	0	0
	562	0	0	0	0	0	0	0	0	0	0	0	0	0	0	0	0	0	0	0	0									562	0	0	0	0	0	0	0	0	0	0	0	0	0	0	0	0	0	0	0
	563	0	0	0	0	0	0	0	0	0	0	0	0	0	0	0	0	0	0	0	0									563	0	0	0	0	0	0	0	0	0	0	0	0	0	0	0	0	0	0	0
	564	0	0	0	0	0	0	0	0	0	0	0	0	0	0	0	0	0	0	0	0									564	0	0	0	0	0	0	0	0	0	0	0	0	0	0	0	0	0	0	0
	565	0	0	0	0	0	0	0	0	0	0	0	0	0	0	0	0	0	0	0	0									565	0	0	0	0	0	0	0	0	0	0	0	0	0	0	0	0	0	0	0
	566	0	0	0	0	0	0	0	0	0	0	0	0	0	0	0	0	0	0	0	0									566	0	0	0	0	0	0	0	0	0	0	0	0	0	0	0	0	0	0	0
	567	0	0	0	0	0	0	0	0	0	0	0	0	0	0	0	0	0	0	0	0									567	0	0	0	0	0	0	0	0	0	0	0	0	0	0	0	0	0	0	0
	568	0	0	0	0	0	0	0	0	0	0	0	0	0	0	0	0	0	0	0	0									568	0	0	0	0	0	0	0	0	0	0	0	0	0	0	0	0	0	0	0
	569	0	0	0	0	0	0	0	0	0	0	0	0	0	0	0	0	0	0	0	0									569	0	0	0	0	0	0	0	0	0	0	0	0	0	0	0	0	0	0	0
	570	0	0	0	0	0	0	0	0	0	0	0	0	0	0	0	0	0	0	0	0									570	0	0	0	0	0	0	0	0	0	0	0	0	0	0	0	0	0	0	0
	571	0	0	0	0	0	0	0	0	0	0	0	0	0	0	0	0	0	0	0	0									571	0	0	0	0	0	0	0	0	0	0	0	0	0	0	0	0	0	0	0
	572	0	0	0	0	0	0	0	0	0	0	0	0	0	0	0	0	0	0	0	0									572	0	0	0	0	0	0	0	0	0	0	0	0	0	0	0	0	0	0	0
	573	0	0	0	0	0	0	0	0	0	0	0	0	0	0	0	0	0	0	0	0									573	0	0	0	0	0	0	0	0	0	0	0	0	0	0	0	0	0	0	0
	574	0	0	0	0	0	0	0	0	0	0	0	0	0	0	0	0	0	0	0	0									574	0	0	0	0	0	0	0	0	0	0	0	0	0	0	0	0	0	0	0
	575	0	0	0	0	0	0	0	0	0	0	0	0	0	0	0	0	0	0	0	0									575	0	0	0	0	0	0	0	0	0	0	0	0	0	0	0	0	0	0	0
	576	0	0	0	0	0	0	0	0	0	0	0	0	0	0	0	0	0	0	0	0									576	0	0	0	0	0	0	0	0	0	0	0	0	0	0	0	0	0	0	0
	577	0	0	0	0	0	0	0	0	0	0	0	0	0	0	0	0	0	0	0	0									577	0	0	0	0	0	0	0	0	0	0	0	0	0	0	0	0	0	0	0
	578	0	0	0	0	0	0	0	0	0	0	0	0	0	0	0	0	0	0	0	0									578	0	0	0	0	0	0	0	0	0	0	0	0	0	0	0	0	0	0	0
	579	0	0	0	0	0	0	0	0	0	0	0	0	0	0	0	0	0	0	0	0									579	0	0	0	0	0	0	0	0	0	0	0	0	0	0	0	0	0	0	0
	580	0	0	0	0	0	0	0	0	0	0	0	0	0	0	0	0	0	0	0	0									580	0	0	0	0	0	0	0	0	0	0	0	0	0	0	0	0	0	0	0
	581	0	0	0	0	0	0	0	0	0	0	0	0	0	0	0	0	0	0	0	0									581	0	0	0	0	0	0	0	0	0	0	0	0	0	0	0	0	0	0	0
	582	0	0	0	0	0	0	0	0	0	0	0	0	0	0	0	0	0	0	0	0									582	0	0	0	0	0	0	0	0	0	0	0	0	0	0	0	0	0	0	0
	583	0	0	0	0	0	0	0	0	0	0	0	0	0	0	0	0	0	0	0	0									583	0	0	0	0	0	0	0	0	0	0	0	0	0	0	0	0	0	0	0
	584	0	0	0	0	0	0	0	0	0	0	0	0	0	0	0	0	0	0	0	0									584	0	0	0	0	0	0	0	0	0	0	0	0	0	0	0	0	0	0	0
	585	0	0	0	0	0	0	0	0	0	0	0	0	0	0	0	0	0	0	0	0									585	0	0	0	0	0	0	0	0	0	0	0	0	0	0	0	0	0	0	0
	586	0	0	0	0	0	0	0	0	0	0	0	0	0	0	0	0	0	0	0	0									586	0	0	0	0	0	0	0	0	0	0	0	0	0	0	0	0	0	0	0
	587	0	0	0	0	0	0	0	0	0	0	0	0	0	0	0	0	0	0	0	0									587	0	0	0	0	0	0	0	0	0	0	0	0	0	0	0	0	0	0	0
	588	0	0	0	0	0	0	0	0	0	0	0	0	0	0	0	0	0	0	0	0									588	0	0	0	0	0	0	0	0	0	0	0	0	0	0	0	0	0	0	0
	589	0	0	0	0	0	0	0	0	0	0	0	0	0	0	0	0	0	0	0	0									589	0	0	0	0	0	0	0	0	0	0	0	0	0	0	0	0	0	0	0
	590	0	0	0	0	0	0	0	0	0	0	0	0	0	0	0	0	0	0	0	0									590	0	0	0	0	0	0	0	0	0	0	0	0	0	0	0	0	0	0	0
	591	0	0	0	0	0	0	0	0	0	0	0	0	0	0	0	0	0	0	0	0									591	0	0	0	0	0	0	0	0	0	0	0	0	0	0	0	0	0	0	0
	592	0	0	0	0	0	0	0	0	0	0	0	0	0	0	0	0	0	0	0	0									592	0	0	0	0	0	0	0	0	0	0	0	0	0	0	0	0	0	0	0
	593	0	0	0	0	0	0	0	0	0	0	0	0	0	0	0	0	0	0	0	0									593	0	0	0	0	0	0	0	0	0	0	0	0	0	0	0	0	0	0	0
	594	0	0	0	0	0	0	0	0	0	0	0	0	0	0	0	0	0	0	0	0									594	0	0	0	0	0	0	0	0	0	0	0	0	0	0	0	0	0	0	0
	595	0	0	0	0	0	0	0	0	0	0	0	0	0	0	0	0	0	0	0	0									595	0	0	0	0	0	0	0	0	0	0	0	0	0	0	0	0	0	0	0
	596	0	0	0	0	0	0	0	0	0	0	0	0	0	0	0	0	0	0	0	0									596	0	0	0	0	0	0	0	0	0	0	0	0	0	0	0	0	0	0	0
	597	0	0	0	0	0	0	0	0	0	0	0	0	0	0	0	0	0	0	0	0									597	0	0	0	0	0	0	0	0	0	0	0	0	0	0	0	0	0	0	0
	598	0	0	0	0	0	0	0	0	0	0	0	0	0	0	0	0	0	0	0	0									598	0	0	0	0	0	0	0	0	0	0	0	0	0	0	0	0	0	0	0
	599	0	0	0	0	0	0	0	0	0	0	0	0	0	0	0	0	0	0	0	0									599	0	0	0	0	0	0	0	0	0	0	0	0	0	0	0	0	0	0	0
	600	0	0	0	0	0	0	0	0	0	0	0	0	0	0	0	0	0	0	0	0									600	0	0	0	0	0	0	0	0	0	0	0	0	0	0	0	0	0	0	0
	601	0	0	0	0	0	0	0	0	0	0	0	0	0	0	0	0	0	0	0	0									601	0	0	0	0	0	0	0	0	0	0	0	0	0	0	0	0	0	0	0
	602	0	0	0	0	0	0	0	0	0	0	0	0	0	0	0	0	0	0	0	0									602	0	0	0	0	0	0	0	0	0	0	0	0	0	0	0	0	0	0	0
	603	0	0	0	0	0	0	0	0	0	0	0	0	0	0	0	0	0	0	0	0									603	0	0	0	0	0	0	0	0	0	0	0	0	0	0	0	0	0	0	0
	604	0	0	0	0	0	0	0	0	0	0	0	0	0	0	0	0	0	0	0	0									604	0	0	0	0	0	0	0	0	0	0	0	0	0	0	0	0	0	0	0
	605	0	0	0	0	0	0	0	0	0	0	0	0	0	0	0	0	0	0	0	0									605	0	0	0	0	0	0	0	0	0	0	0	0	0	0	0	0	0	0	0
	606	0	0	0	0	0	0	0	0	0	0	0	0	0	0	0	0	0	0	0	0									606	0	0	0	0	0	0	0	0	0	0	0	0	0	0	0	0	0	0	0
	607	0	0	0	0	0	0	0	0	0	0	0	0	0	0	0	0	0	0	0	0									607	0	0	0	0	0	0	0	0	0	0	0	0	0	0	0	0	0	0	0
	608	0	0	0	0	0	0	0	0	0	0	0	0	0	0	0	0	0	0	0	0									608	0	0	0	0	0	0	0	0	0	0	0	0	0	0	0	0	0	0	0
	609	0	0	0	0	0	0	0	0	0	0	0	0	0	0	0	0	0	0	0	0									609	0	0	0	0	0	0	0	0	0	0	0	0	0	0	0	0	0	0	0
	610	0	0	0	0	0	0	0	0	0	0	0	0	0	0	0	0	0	0	0	0									610	0	0	0	0	0	0	0	0	0	0	0	0	0	0	0	0	0	0	0
	611	0	0	0	0	0	0	0	0	0	0	0	0	0	0	0	0	0	0	0	0									611	0	0	0	0	0	0	0	0	0	0	0	0	0	0	0	0	0	0	0
	612	0	0	0	0	0	0	0	0	0	0	0	0	0	0	0	0	0	0	0	0									612	0	0	0	0	0	0	0	0	0	0	0	0	0	0	0	0	0	0	0
	613	0	0	0	0	0	0	0	0	0	0	0	0	0	0	0	0	0	0	0	0									613	0	0	0	0	0	0	0	0	0	0	0	0	0	0	0	0	0	0	0
	614	0	0	0	0	0	0	0	0	0	0	0	0	0	0	0	0	0	0	0	0									614	0	0	0	0	0	0	0	0	0	0	0	0	0	0	0	0	0	0	0
	615	0	0	0	0	0	0	0	0	0	0	0	0	0	0	0	0	0	0	0	0									615	0	0	0	0	0	0	0	0	0	0	0	0	0	0	0	0	0	0	0
	616	0	0	0	0	0	0	0	0	0	0	0	0	0	0	0	0	0	0	0	0									616	0	0	0	0	0	0	0	0	0	0	0	0	0	0	0	0	0	0	0
	617	0	0	0	0	0	0	0	0	0	0	0	0	0	0	0	0	0	0	0	0									617	0	0	0	0	0	0	0	0	0	0	0	0	0	0	0	0	0	0	0
	618	0	0	0	0	0	0	0	0	0	0	0	0	0	0	0	0	0	0	0	0									618	0	0	0	0	0	0	0	0	0	0	0	0	0	0	0	0	0	0	0
	619	0	0	0	0	0	0	0	0	0	0	0	0	0	0	0	0	0	0	0	0									619	0	0	0	0	0	0	0	0	0	0	0	0	0	0	0	0	0	0	0
	620	0	0	0	0	0	0	0	0	0	0	0	0	0	0	0	0	0	0	0	0									620	0	0	0	0	0	0	0	0	0	0	0	0	0	0	0	0	0	0	0
	621	0	0	0	0	0	0	0	0	0	0	0	0	0	0	0	0	0	0	0	0									621	0	0	0	0	0	0	0	0	0	0	0	0	0	0	0	0	0	0	0
	622	0	0	0	0	0	0	0	0	0	0	0	0	0	0	0	0	0	0	0	0									622	0	0	0	0	0	0	0	0	0	0	0	0	0	0	0	0	0	0	0
	623	0	0	0	0	0	0	0	0	0	0	0	0	0	0	0	0	0	0	0	0									623	0	0	0	0	0	0	0	0	0	0	0	0	0	0	0	0	0	0	0
	624	0	0	0	0	0	0	0	0	0	0	0	0	0	0	0	0	0	0	0	0									624	0	0	0	0	0	0	0	0	0	0	0	0	0	0	0	0	0	0	0
	625	0	0	0	0	0	0	0	0	0	0	0	0	0	0	0	0	0	0	0	0									625	0	0	0	0	0	0	0	0	0	0	0	0	0	0	0	0	0	0	0
	626	0	0	0	0	0	0	0	0	0	0	0	0	0	0	0	0	0	0	0	0									626	0	0	0	0	0	0	0	0	0	0	0	0	0	0	0	0	0	0	0
	627	0	0	0	0	0	0	0	0	0	0	0	0	0	0	0	0	0	0	0	0									627	0	0	0	0	0	0	0	0	0	0	0	0	0	0	0	0	0	0	0
	628	0	0	0	0	0	0	0	0	0	0	0	0	0	0	0	0	0	0	0	0									628	0	0	0	0	0	0	0	0	0	0	0	0	0	0	0	0	0	0	0
	629	0	0	0	0	0	0	0	0	0	0	0	0	0	0	0	0	0	0	0	0									629	0	0	0	0	0	0	0	0	0	0	0	0	0	0	0	0	0	0	0
	630	0	0	0	0	0	0	0	0	0	0	0	0	0	0	0	0	0	0	0	0									630	0	0	0	0	0	0	0	0	0	0	0	0	0	0	0	0	0	0	0
	631	0	0	0	0	0	0	0	0	0	0	0	0	0	0	0	0	0	0	0	0									631	0	0	0	0	0	0	0	0	0	0	0	0	0	0	0	0	0	0	0
	632	0	0	0	0	0	0	0	0	0	0	0	0	0	0	0	0	0	0	0	0									632	0	0	0	0	0	0	0	0	0	0	0	0	0	0	0	0	0	0	0
	633	0	0	0	0	0	0	0	0	0	0	0	0	0	0	0	0	0	0	0	0									633	0	0	0	0	0	0	0	0	0	0	0	0	0	0	0	0	0	0	0
	634	0	0	0	0	0	0	0	0	0	0	0	0	0	0	0	0	0	0	0	0									634	0	0	0	0	0	0	0	0	0	0	0	0	0	0	0	0	0	0	0
	635	0	0	0	0	0	0	0	0	0	0	0	0	0	0	0	0	0	0	0	0									635	0	0	0	0	0	0	0	0	0	0	0	0	0	0	0	0	0	0	0
	636	0	0	0	0	0	0	0	0	0	0	0	0	0	0	0	0	0	0	0	0									636	0	0	0	0	0	0	0	0	0	0	0	0	0	0	0	0	0	0	0
	637	0	0	0	0	0	0	0	0	0	0	0	0	0	0	0	0	0	0	0	0									637	0	0	0	0	0	0	0	0	0	0	0	0	0	0	0	0	0	0	0
	638	0	0	0	0	0	0	0	0	0	0	0	0	0	0	0	0	0	0	0	0									638	0	0	0	0	0	0	0	0	0	0	0	0	0	0	0	0	0	0	0
	639	0	0	0	0	0	0	0	0	0	0	0	0	0	0	0	0	0	0	0	0									639	0	0	0	0	0	0	0	0	0	0	0	0	0	0	0	0	0	0	0
	640	0	0	0	0	0	0	0	0	0	0	0	0	0	0	0	0	0	0	0	0									640	0	0	0	0	0	0	0	0	0	0	0	0	0	0	0	0	0	0	0
	641	0	0	0	0	0	0	0	0	0	0	0	0	0	0	0	0	0	0	0	0									641	0	0	0	0	0	0	0	0	0	0	0	0	0	0	0	0	0	0	0
	642	0	0	0	0	0	0	0	0	0	0	0	0	0	0	0	0	0	0	0	0									642	0	0	0	0	0	0	0	0	0	0	0	0	0	0	0	0	0	0	0
	643	0	0	0	0	0	0	0	0	0	0	0	0	0	0	0	0	0	0	0	0									643	0	0	0	0	0	0	0	0	0	0	0	0	0	0	0	0	0	0	0
	644	0	0	0	0	0	0	0	0	0	0	0	0	0	0	0	0	0	0	0	0									644	0	0	0	0	0	0	0	0	0	0	0	0	0	0	0	0	0	0	0
	645	0	0	0	0	0	0	0	0	0	0	0	0	0	0	0	0	0	0	0	0									645	0	0	0	0	0	0	0	0	0	0	0	0	0	0	0	0	0	0	0
	646	0	0	0	0	0	0	0	0	0	0	0	0	0	0	0	0	0	0	0	0									646	0	0	0	0	0	0	0	0	0	0	0	0	0	0	0	0	0	0	0
	647	0	0	0	0	0	0	0	0	0	0	0	0	0	0	0	0	0	0	0	0									647	0	0	0	0	0	0	0	0	0	0	0	0	0	0	0	0	0	0	0
	648	0	0	0	0	0	0	0	0	0	0	0	0	0	0	0	0	0	0	0	0									648	0	0	0	0	0	0	0	0	0	0	0	0	0	0	0	0	0	0	0
	649	0	0	0	0	0	0	0	0	0	0	0	0	0	0	0	0	0	0	0	0									649	0	0	0	0	0	0	0	0	0	0	0	0	0	0	0	0	0	0	0
	650	0	0	0	0	0	0	0	0	0	0	0	0	0	0	0	0	0	0	0	0									650	0	0	0	0	0	0	0	0	0	0	0	0	0	0	0	0	0	0	0
	651	0	0	0	0	0	0	0	0	0	0	0	0	0	0	0	0	0	0	0	0									651	0	0	0	0	0	0	0	0	0	0	0	0	0	0	0	0	0	0	0
	652	0	0	0	0	0	0	0	0	0	0	0	0	0	0	0	0	0	0	0	0									652	0	0	0	0	0	0	0	0	0	0	0	0	0	0	0	0	0	0	0
	653	0	0	0	0	0	0	0	0	0	0	0	0	0	0	0	0	0	0	0	0									653	0	0	0	0	0	0	0	0	0	0	0	0	0	0	0	0	0	0	0
	654	0	0	0	0	0	0	0	0	0	0	0	0	0	0	0	0	0	0	0	0									654	0	0	0	0	0	0	0	0	0	0	0	0	0	0	0	0	0	0	0
	655	0	0	0	0	0	0	0	0	0	0	0	0	0	0	0	0	0	0	0	0									655	0	0	0	0	0	0	0	0	0	0	0	0	0	0	0	0	0	0	0
	656	0	0	0	0	0	0	0	0	0	0	0	0	0	0	0	0	0	0	0	0									656	0	0	0	0	0	0	0	0	0	0	0	0	0	0	0	0	0	0	0
	657	0	0	0	0	0	0	0	0	0	0	0	0	0	0	0	0	0	0	0	0									657	0	0	0	0	0	0	0	0	0	0	0	0	0	0	0	0	0	0	0
	658	0	0	0	0	0	0	0	0	0	0	0	0	0	0	0	0	0	0	0	0									658	0	0	0	0	0	0	0	0	0	0	0	0	0	0	0	0	0	0	0
	659	0	0	0	0	0	0	0	0	0	0	0	0	0	0	0	0	0	0	0	0									659	0	0	0	0	0	0	0	0	0	0	0	0	0	0	0	0	0	0	0
	660	0	0	0	0	0	0	0	0	0	0	0	0	0	0	0	0	0	0	0	0									660	0	0	0	0	0	0	0	0	0	0	0	0	0	0	0	0	0	0	0
	661	0	0	0	0	0	0	0	0	0	0	0	0	0	0	0	0	0	0	0	0									661	0	0	0	0	0	0	0	0	0	0	0	0	0	0	0	0	0	0	0
	662	0	0	0	0	0	0	0	0	0	0	0	0	0	0	0	0	0	0	0	0									662	0	0	0	0	0	0	0	0	0	0	0	0	0	0	0	0	0	0	0
	663	0	0	0	0	0	0	0	0	0	0	0	0	0	0	0	0	0	0	0	0									663	0	0	0	0	0	0	0	0	0	0	0	0	0	0	0	0	0	0	0
	664	0	0	0	0	0	0	0	0	0	0	0	0	0	0	0	0	0	0	0	0									664	0	0	0	0	0	0	0	0	0	0	0	0	0	0	0	0	0	0	0
	665	0	0	0	0	0	0	0	0	0	0	0	0	0	0	0	0	0	0	0	0									665	0	0	0	0	0	0	0	0	0	0	0	0	0	0	0	0	0	0	0
	666	0	0	0	0	0	0	0	0	0	0	0	0	0	0	0	0	0	0	0	0									666	0	0	0	0	0	0	0	0	0	0	0	0	0	0	0	0	0	0	0
	667	0	0	0	0	0	0	0	0	0	0	0	0	0	0	0	0	0	0	0	0									667	0	0	0	0	0	0	0	0	0	0	0	0	0	0	0	0	0	0	0
	668	0	0	0	0	0	0	0	0	0	0	0	0	0	0	0	0	0	0	0	0									668	0	0	0	0	0	0	0	0	0	0	0	0	0	0	0	0	0	0	0
	669	0	0	0	0	0	0	0	0	0	0	0	0	0	0	0	0	0	0	0	0									669	0	0	0	0	0	0	0	0	0	0	0	0	0	0	0	0	0	0	0
	670	0	0	0	0	0	0	0	0	0	0	0	0	0	0	0	0	0	0	0	0									670	0	0	0	0	0	0	0	0	0	0	0	0	0	0	0	0	0	0	0
	671	0	0	0	0	0	0	0	0	0	0	0	0	0	0	0	0	0	0	0	0									671	0	0	0	0	0	0	0	0	0	0	0	0	0	0	0	0	0	0	0
	672	0	0	0	0	0	0	0	0	0	0	0	0	0	0	0	0	0	0	0	0									672	0	0	0	0	0	0	0	0	0	0	0	0	0	0	0	0	0	0	0
	673	0	0	0	0	0	0	0	0	0	0	0	0	0	0	0	0	0	0	0	0									673	0	0	0	0	0	0	0	0	0	0	0	0	0	0	0	0	0	0	0
	674	0	0	0	0	0	0	0	0	0	0	0	0	0	0	0	0	0	0	0	0									674	0	0	0	0	0	0	0	0	0	0	0	0	0	0	0	0	0	0	0
	675	0	0	0	0	0	0	0	0	0	0	0	0	0	0	0	0	0	0	0	0									675	0	0	0	0	0	0	0	0	0	0	0	0	0	0	0	0	0	0	0
	676	0	0	0	0	0	0	0	0	0	0	0	0	0	0	0	0	0	0	0	0									676	0	0	0	0	0	0	0	0	0	0	0	0	0	0	0	0	0	0	0
	677	0	0	0	0	0	0	0	0	0	0	0	0	0	0	0	0	0	0	0	0									677	0	0	0	0	0	0	0	0	0	0	0	0	0	0	0	0	0	0	0
	678	0	0	0	0	0	0	0	0	0	0	0	0	0	0	0	0	0	0	0	0									678	0	0	0	0	0	0	0	0	0	0	0	0	0	0	0	0	0	0	0
	679	0	0	0	0	0	0	0	0	0	0	0	0	0	0	0	0	0	0	0	0									679	0	0	0	0	0	0	0	0	0	0	0	0	0	0	0	0	0	0	0
	680	0	0	0	0	0	0	0	0	0	0	0	0	0	0	0	0	0	0	0	0									680	0	0	0	0	0	0	0	0	0	0	0	0	0	0	0	0	0	0	0
	681	0	0	0	0	0	0	0	0	0	0	0	0	0	0	0	0	0	0	0	0									681	0	0	0	0	0	0	0	0	0	0	0	0	0	0	0	0	0	0	0
	682	0	0	0	0	0	0	0	0	0	0	0	0	0	0	0	0	0	0	0	0									682	0	0	0	0	0	0	0	0	0	0	0	0	0	0	0	0	0	0	0
	683	0	0	0	0	0	0	0	0	0	0	0	0	0	0	0	0	0	0	0	0									683	0	0	0	0	0	0	0	0	0	0	0	0	0	0	0	0	0	0	0
	684	0	0	0	0	0	0	0	0	0	0	0	0	0	0	0	0	0	0	0	0									684	0	0	0	0	0	0	0	0	0	0	0	0	0	0	0	0	0	0	0
	685	0	0	0	0	0	0	0	0	0	0	0	0	0	0	0	0	0	0	0	0									685	0	0	0	0	0	0	0	0	0	0	0	0	0	0	0	0	0	0	0
	686	0	0	0	0	0	0	0	0	0	0	0	0	0	0	0	0	0	0	0	0									686	0	0	0	0	0	0	0	0	0	0	0	0	0	0	0	0	0	0	0
	687	0	0	0	0	0	0	0	0	0	0	0	0	0	0	0	0	0	0	0	0									687	0	0	0	0	0	0	0	0	0	0	0	0	0	0	0	0	0	0	0
	688	0	0	0	0	0	0	0	0	0	0	0	0	0	0	0	0	0	0	0	0									688	0	0	0	0	0	0	0	0	0	0	0	0	0	0	0	0	0	0	0
	689	0	0	0	0	0	0	0	0	0	0	0	0	0	0	0	0	0	0	0	0									689	0	0	0	0	0	0	0	0	0	0	0	0	0	0	0	0	0	0	0
	690	0	0	0	0	0	0	0	0	0	0	0	0	0	0	0	0	0	0	0	0									690	0	0	0	0	0	0	0	0	0	0	0	0	0	0	0	0	0	0	0
	691	0	0	0	0	0	0	0	0	0	0	0	0	0	0	0	0	0	0	0	0									691	0	0	0	0	0	0	0	0	0	0	0	0	0	0	0	0	0	0	0
	692	0	0	0	0	0	0	0	0	0	0	0	0	0	0	0	0	0	0	0	0									692	0	0	0	0	0	0	0	0	0	0	0	0	0	0	0	0	0	0	0
	693	0	0	0	0	0	0	0	0	0	0	0	0	0	0	0	0	0	0	0	0									693	0	0	0	0	0	0	0	0	0	0	0	0	0	0	0	0	0	0	0
	694	0	0	0	0	0	0	0	0	0	0	0	0	0	0	0	0	0	0	0	0									694	0	0	0	0	0	0	0	0	0	0	0	0	0	0	0	0	0	0	0
	695	0	0	0	0	0	0	0	0	0	0	0	0	0	0	0	0	0	0	0	0									695	0	0	0	0	0	0	0	0	0	0	0	0	0	0	0	0	0	0	0
	696	0	0	0	0	0	0	0	0	0	0	0	0	0	0	0	0	0	0	0	0									696	0	0	0	0	0	0	0	0	0	0	0	0	0	0	0	0	0	0	0
	697	0	0	0	0	0	0	0	0	0	0	0	0	0	0	0	0	0	0	0	0									697	0	0	0	0	0	0	0	0	0	0	0	0	0	0	0	0	0	0	0
	698	0	0	0	0	0	0	0	0	0	0	0	0	0	0	0	0	0	0	0	0									698	0	0	0	0	0	0	0	0	0	0	0	0	0	0	0	0	0	0	0
	699	0	0	0	0	0	0	0	0	0	0	0	0	0	0	0	0	0	0	0	0									699	0	0	0	0	0	0	0	0	0	0	0	0	0	0	0	0	0	0	0
	700	0	0	0	0	0	0	0	0	0	0	0	0	0	0	0	0	0	0	0	0									700	0	0	0	0	0	0	0	0	0	0	0	0	0	0	0	0	0	0	0
	701	0	0	0	0	0	0	0	0	0	0	0	0	0	0	0	0	0	0	0	0									701	0	0	0	0	0	0	0	0	0	0	0	0	0	0	0	0	0	0	0
	702	0	0	0	0	0	0	0	0	0	0	0	0	0	0	0	0	0	0	0	0									702	0	0	0	0	0	0	0	0	0	0	0	0	0	0	0	0	0	0	0
	703	0	0	0	0	0	0	0	0	0	0	0	0	0	0	0	0	0	0	0	0									703	0	0	0	0	0	0	0	0	0	0	0	0	0	0	0	0	0	0	0
	704	0	0	0	0	0	0	0	0	0	0	0	0	0	0	0	0	0	0	0	0									704	0	0	0	0	0	0	0	0	0	0	0	0	0	0	0	0	0	0	0
	705	0	0	0	0	0	0	0	0	0	0	0	0	0	0	0	0	0	0	0	0									705	0	0	0	0	0	0	0	0	0	0	0	0	0	0	0	0	0	0	0
	706	0	0	0	0	0	0	0	0	0	0	0	0	0	0	0	0	0	0	0	0									706	0	0	0	0	0	0	0	0	0	0	0	0	0	0	0	0	0	0	0
	707	0	0	0	0	0	0	0	0	0	0	0	0	0	0	0	0	0	0	0	0									707	0	0	0	0	0	0	0	0	0	0	0	0	0	0	0	0	0	0	0
	708	0	0	0	0	0	0	0	0	0	0	0	0	0	0	0	0	0	0	0	0									708	0	0	0	0	0	0	0	0	0	0	0	0	0	0	0	0	0	0	0
	709	0	0	0	0	0	0	0	0	0	0	0	0	0	0	0	0	0	0	0	0									709	0	0	0	0	0	0	0	0	0	0	0	0	0	0	0	0	0	0	0
	710	0	0	0	0	0	0	0	0	0	0	0	0	0	0	0	0	0	0	0	0									710	0	0	0	0	0	0	0	0	0	0	0	0	0	0	0	0	0	0	0
	711	0	0	0	0	0	0	0	0	0	0	0	0	0	0	0	0	0	0	0	0									711	0	0	0	0	0	0	0	0	0	0	0	0	0	0	0	0	0	0	0
	712	0	0	0	0	0	0	0	0	0	0	0	0	0	0	0	0	0	0	0	0									712	0	0	0	0	0	0	0	0	0	0	0	0	0	0	0	0	0	0	0
	713	0	0	0	0	0	0	0	0	0	0	0	0	0	0	0	0	0	0	0	0									713	0	0	0	0	0	0	0	0	0	0	0	0	0	0	0	0	0	0	0
	714	0	0	0	0	0	0	0	0	0	0	0	0	0	0	0	0	0	0	0	0									714	0	0	0	0	0	0	0	0	0	0	0	0	0	0	0	0	0	0	0
	715	0	0	0	0	0	0	0	0	0	0	0	0	0	0	0	0	0	0	0	0									715	0	0	0	0	0	0	0	0	0	0	0	0	0	0	0	0	0	0	0
	716	0	0	0	0	0	0	0	0	0	0	0	0	0	0	0	0	0	0	0	0									716	0	0	0	0	0	0	0	0	0	0	0	0	0	0	0	0	0	0	0
	717	0	0	0	0	0	0	0	0	0	0	0	0	0	0	0	0	0	0	0	0									717	0	0	0	0	0	0	0	0	0	0	0	0	0	0	0	0	0	0	0
	718	0	0	0	0	0	0	0	0	0	0	0	0	0	0	0	0	0	0	0	0									718	0	0	0	0	0	0	0	0	0	0	0	0	0	0	0	0	0	0	0
	719	0	0	0	0	0	0	0	0	0	0	0	0	0	0	0	0	0	0	0	0									719	0	0	0	0	0	0	0	0	0	0	0	0	0	0	0	0	0	0	0
	720	0	0	0	0	0	0	0	0	0	0	0	0	0	0	0	0	0	0	0	0									720	0	0	0	0	0	0	0	0	0	0	0	0	0	0	0	0	0	0	0
	721	0	0	0	0	0	0	0	0	0	0	0	0	0	0	0	0	0	0	0	0									721	0	0	0	0	0	0	0	0	0	0	0	0	0	0	0	0	0	0	0
	722	0	0	0	0	0	0	0	0	0	0	0	0	0	0	0	0	0	0	0	0									722	0	0	0	0	0	0	0	0	0	0	0	0	0	0	0	0	0	0	0
	723	0	0	0	0	0	0	0	0	0	0	0	0	0	0	0	0	0	0	0	0									723	0	0	0	0	0	0	0	0	0	0	0	0	0	0	0	0	0	0	0
	724	0	0	0	0	0	0	0	0	0	0	0	0	0	0	0	0	0	0	0	0									724	0	0	0	0	0	0	0	0	0	0	0	0	0	0	0	0	0	0	0
	725	0	0	0	0	0	0	0	0	0	0	0	0	0	0	0	0	0	0	0	0									725	0	0	0	0	0	0	0	0	0	0	0	0	0	0	0	0	0	0	0
	726	0	0	0	0	0	0	0	0	0	0	0	0	0	0	0	0	0	0	0	0									726	0	0	0	0	0	0	0	0	0	0	0	0	0	0	0	0	0	0	0
	727	0	0	0	0	0	0	0	0	0	0	0	0	0	0	0	0	0	0	0	0									727	0	0	0	0	0	0	0	0	0	0	0	0	0	0	0	0	0	0	0
	728	0	0	0	0	0	0	0	0	0	0	0	0	0	0	0	0	0	0	0	0									728	0	0	0	0	0	0	0	0	0	0	0	0	0	0	0	0	0	0	0
	729	0	0	0	0	0	0	0	0	0	0	0	0	0	0	0	0	0	0	0	0									729	0	0	0	0	0	0	0	0	0	0	0	0	0	0	0	0	0	0	0
	730	0	0	0	0	0	0	0	0	0	0	0	0	0	0	0	0	0	0	0	0									730	0	0	0	0	0	0	0	0	0	0	0	0	0	0	0	0	0	0	0
	731	0	0	0	0	0	0	0	0	0	0	0	0	0	0	0	0	0	0	0	0									731	0	0	0	0	0	0	0	0	0	0	0	0	0	0	0	0	0	0	0
	732	0	0	0	0	0	0	0	0	0	0	0	0	0	0	0	0	0	0	0	0									732	0	0	0	0	0	0	0	0	0	0	0	0	0	0	0	0	0	0	0
	733	0	0	0	0	0	0	0	0	0	0	0	0	0	0	0	0	0	0	0	0									733	0	0	0	0	0	0	0	0	0	0	0	0	0	0	0	0	0	0	0
	734	0	0	0	0	0	0	0	0	0	0	0	0	0	0	0	0	0	0	0	0									734	0	0	0	0	0	0	0	0	0	0	0	0	0	0	0	0	0	0	0
	735	0	0	0	0	0	0	0	0	0	0	0	0	0	0	0	0	0	0	0	0									735	0	0	0	0	0	0	0	0	0	0	0	0	0	0	0	0	0	0	0
	736	0	0	0	0	0	0	0	0	0	0	0	0	0	0	0	0	0	0	0	0									736	0	0	0	0	0	0	0	0	0	0	0	0	0	0	0	0	0	0	0
	737	0	0	0	0	0	0	0	0	0	0	0	0	0	0	0	0	0	0	0	0									737	0	0	0	0	0	0	0	0	0	0	0	0	0	0	0	0	0	0	0
	738	0	0	0	0	0	0	0	0	0	0	0	0	0	0	0	0	0	0	0	0									738	0	0	0	0	0	0	0	0	0	0	0	0	0	0	0	0	0	0	0
	739	0	0	0	0	0	0	0	0	0	0	0	0	0	0	0	0	0	0	0	0									739	0	0	0	0	0	0	0	0	0	0	0	0	0	0	0	0	0	0	0
	740	0	0	0	0	0	0	0	0	0	0	0	0	0	0	0	0	0	0	0	0									740	0	0	0	0	0	0	0	0	0	0	0	0	0	0	0	0	0	0	0
	741	0	0	0	0	0	0	0	0	0	0	0	0	0	0	0	0	0	0	0	0									741	0	0	0	0	0	0	0	0	0	0	0	0	0	0	0	0	0	0	0
	742	0	0	0	0	0	0	0	0	0	0	0	0	0	0	0	0	0	0	0	0									742	0	0	0	0	0	0	0	0	0	0	0	0	0	0	0	0	0	0	0
	743	0	0	0	0	0	0	0	0	0	0	0	0	0	0	0	0	0	0	0	0									743	0	0	0	0	0	0	0	0	0	0	0	0	0	0	0	0	0	0	0
	744	0	0	0	0	0	0	0	0	0	0	0	0	0	0	0	0	0	0	0	0									744	0	0	0	0	0	0	0	0	0	0	0	0	0	0	0	0	0	0	0
	745	0	0	0	0	0	0	0	0	0	0	0	0	0	0	0	0	0	0	0	0									745	0	0	0	0	0	0	0	0	0	0	0	0	0	0	0	0	0	0	0
	746	0	0	0	0	0	0	0	0	0	0	0	0	0	0	0	0	0	0	0	0									746	0	0	0	0	0	0	0	0	0	0	0	0	0	0	0	0	0	0	0
	747	0	0	0	0	0	0	0	0	0	0	0	0	0	0	0	0	0	0	0	0									747	0	0	0	0	0	0	0	0	0	0	0	0	0	0	0	0	0	0	0
	748	0	0	0	0	0	0	0	0	0	0	0	0	0	0	0	0	0	0	0	0									748	0	0	0	0	0	0	0	0	0	0	0	0	0	0	0	0	0	0	0
	749	0	0	0	0	0	0	0	0	0	0	0	0	0	0	0	0	0	0	0	0									749	0	0	0	0	0	0	0	0	0	0	0	0	0	0	0	0	0	0	0
	750	0	0	0	0	0	0	0	0	0	0	0	0	0	0	0	0	0	0	0	0									750	0	0	0	0	0	0	0	0	0	0	0	0	0	0	0	0	0	0	0
	751	0	0	0	0	0	0	0	0	0	0	0	0	0	0	0	0	0	0	0	0									751	0	0	0	0	0	0	0	0	0	0	0	0	0	0	0	0	0	0	0
	752	0	0	0	0	0	0	0	0	0	0	0	0	0	0	0	0	0	0	0	0									752	0	0	0	0	0	0	0	0	0	0	0	0	0	0	0	0	0	0	0
	753	0	0	0	0	0	0	0	0	0	0	0	0	0	0	0	0	0	0	0	0									753	0	0	0	0	0	0	0	0	0	0	0	0	0	0	0	0	0	0	0
	754	0	0	0	0	0	0	0	0	0	0	0	0	0	0	0	0	0	0	0	0									754	0	0	0	0	0	0	0	0	0	0	0	0	0	0	0	0	0	0	0
	755	0	0	0	0	0	0	0	0	0	0	0	0	0	0	0	0	0	0	0	0									755	0	0	0	0	0	0	0	0	0	0	0	0	0	0	0	0	0	0	0
	756	0	0	0	0	0	0	0	0	0	0	0	0	0	0	0	0	0	0	0	0									756	0	0	0	0	0	0	0	0	0	0	0	0	0	0	0	0	0	0	0
	757	0	0	0	0	0	0	0	0	0	0	0	0	0	0	0	0	0	0	0	0									757	0	0	0	0	0	0	0	0	0	0	0	0	0	0	0	0	0	0	0
	758	0	0	0	0	0	0	0	0	0	0	0	0	0	0	0	0	0	0	0	0									758	0	0	0	0	0	0	0	0	0	0	0	0	0	0	0	0	0	0	0
	759	0	0	0	0	0	0	0	0	0	0	0	0	0	0	0	0	0	0	0	0									759	0	0	0	0	0	0	0	0	0	0	0	0	0	0	0	0	0	0	0
	760	0	0	0	0	0	0	0	0	0	0	0	0	0	0	0	0	0	0	0	0									760	0	0	0	0	0	0	0	0	0	0	0	0	0	0	0	0	0	0	0
	761	0	0	0	0	0	0	0	0	0	0	0	0	0	0	0	0	0	0	0	0									761	0	0	0	0	0	0	0	0	0	0	0	0	0	0	0	0	0	0	0
	762	0	0	0	0	0	0	0	0	0	0	0	0	0	0	0	0	0	0	0	0									762	0	0	0	0	0	0	0	0	0	0	0	0	0	0	0	0	0	0	0
	763	0	0	0	0	0	0	0	0	0	0	0	0	0	0	0	0	0	0	0	0									763	0	0	0	0	0	0	0	0	0	0	0	0	0	0	0	0	0	0	0
	764	0	0	0	0	0	0	0	0	0	0	0	0	0	0	0	0	0	0	0	0									764	0	0	0	0	0	0	0	0	0	0	0	0	0	0	0	0	0	0	0
	765	0	0	0	0	0	0	0	0	0	0	0	0	0	0	0	0	0	0	0	0									765	0	0	0	0	0	0	0	0	0	0	0	0	0	0	0	0	0	0	0
	766	0	0	0	0	0	0	0	0	0	0	0	0	0	0	0	0	0	0	0	0									766	0	0	0	0	0	0	0	0	0	0	0	0	0	0	0	0	0	0	0
	767	0	0	0	0	0	0	0	0	0	0	0	0	0	0	0	0	0	0	0	0									767	0	0	0	0	0	0	0	0	0	0	0	0	0	0	0	0	0	0	0
	768	0	0	0	0	0	0	0	0	0	0	0	0	0	0	0	0	0	0	0	0									768	0	0	0	0	0	0	0	0	0	0	0	0	0	0	0	0	0	0	0
	769	0	0	0	0	0	0	0	0	0	0	0	0	0	0	0	0	0	0	0	0									769	0	0	0	0	0	0	0	0	0	0	0	0	0	0	0	0	0	0	0
	770	0	0	0	0	0	0	0	0	0	0	0	0	0	0	0	0	0	0	0	0									770	0	0	0	0	0	0	0	0	0	0	0	0	0	0	0	0	0	0	0
	771	0	0	0	0	0	0	0	0	0	0	0	0	0	0	0	0	0	0	0	0									771	0	0	0	0	0	0	0	0	0	0	0	0	0	0	0	0	0	0	0
	772	0	0	0	0	0	0	0	0	0	0	0	0	0	0	0	0	0	0	0	0									772	0	0	0	0	0	0	0	0	0	0	0	0	0	0	0	0	0	0	0
	773	0	0	0	0	0	0	0	0	0	0	0	0	0	0	0	0	0	0	0	0									773	0	0	0	0	0	0	0	0	0	0	0	0	0	0	0	0	0	0	0
	774	0	0	0	0	0	0	0	0	0	0	0	0	0	0	0	0	0	0	0	0									774	0	0	0	0	0	0	0	0	0	0	0	0	0	0	0	0	0	0	0
	775	0	0	0	0	0	0	0	0	0	0	0	0	0	0	0	0	0	0	0	0									775	0	0	0	0	0	0	0	0	0	0	0	0	0	0	0	0	0	0	0
	776	0	0	0	0	0	0	0	0	0	0	0	0	0	0	0	0	0	0	0	0									776	0	0	0	0	0	0	0	0	0	0	0	0	0	0	0	0	0	0	0
	777	0	0	0	0	0	0	0	0	0	0	0	0	0	0	0	0	0	0	0	0									777	0	0	0	0	0	0	0	0	0	0	0	0	0	0	0	0	0	0	0
	778	0	0	0	0	0	0	0	0	0	0	0	0	0	0	0	0	0	0	0	0									778	0	0	0	0	0	0	0	0	0	0	0	0	0	0	0	0	0	0	0
	779	0	0	0	0	0	0	0	0	0	0	0	0	0	0	0	0	0	0	0	0									779	0	0	0	0	0	0	0	0	0	0	0	0	0	0	0	0	0	0	0
	780	0	0	0	0	0	0	0	0	0	0	0	0	0	0	0	0	0	0	0	0									780	0	0	0	0	0	0	0	0	0	0	0	0	0	0	0	0	0	0	0
	781	0	0	0	0	0	0	0	0	0	0	0	0	0	0	0	0	0	0	0	0									781	0	0	0	0	0	0	0	0	0	0	0	0	0	0	0	0	0	0	0
	782	0	0	0	0	0	0	0	0	0	0	0	0	0	0	0	0	0	0	0	0									782	0	0	0	0	0	0	0	0	0	0	0	0	0	0	0	0	0	0	0
	783	0	0	0	0	0	0	0	0	0	0	0	0	0	0	0	0	0	0	0	0									783	0	0	0	0	0	0	0	0	0	0	0	0	0	0	0	0	0	0	0
	784	0	0	0	0	0	0	0	0	0	0	0	0	0	0	0	0	0	0	0	0									784	0	0	0	0	0	0	0	0	0	0	0	0	0	0	0	0	0	0	0
	785	0	0	0	0	0	0	0	0	0	0	0	0	0	0	0	0	0	0	0	0									785	0	0	0	0	0	0	0	0	0	0	0	0	0	0	0	0	0	0	0
	786	0	0	0	0	0	0	0	0	0	0	0	0	0	0	0	0	0	0	0	0									786	0	0	0	0	0	0	0	0	0	0	0	0	0	0	0	0	0	0	0
	787	0	0	0	0	0	0	0	0	0	0	0	0	0	0	0	0	0	0	0	0									787	0	0	0	0	0	0	0	0	0	0	0	0	0	0	0	0	0	0	0
	788	0	0	0	0	0	0	0	0	0	0	0	0	0	0	0	0	0	0	0	0									788	0	0	0	0	0	0	0	0	0	0	0	0	0	0	0	0	0	0	0
	789	0	0	0	0	0	0	0	0	0	0	0	0	0	0	0	0	0	0	0	0									789	0	0	0	0	0	0	0	0	0	0	0	0	0	0	0	0	0	0	0
	790	0	0	0	0	0	0	0	0	0	0	0	0	0	0	0	0	0	0	0	0									790	0	0	0	0	0	0	0	0	0	0	0	0	0	0	0	0	0	0	0
	791	0	0	0	0	0	0	0	0	0	0	0	0	0	0	0	0	0	0	0	0									791	0	0	0	0	0	0	0	0	0	0	0	0	0	0	0	0	0	0	0
	792	0	0	0	0	0	0	0	0	0	0	0	0	0	0	0	0	0	0	0	0									792	0	0	0	0	0	0	0	0	0	0	0	0	0	0	0	0	0	0	0
	793	0	0	0	0	0	0	0	0	0	0	0	0	0	0	0	0	0	0	0	0									793	0	0	0	0	0	0	0	0	0	0	0	0	0	0	0	0	0	0	0
	794	0	0	0	0	0	0	0	0	0	0	0	0	0	0	0	0	0	0	0	0									794	0	0	0	0	0	0	0	0	0	0	0	0	0	0	0	0	0	0	0
	795	0	0	0	0	0	0	0	0	0	0	0	0	0	0	0	0	0	0	0	0									795	0	0	0	0	0	0	0	0	0	0	0	0	0	0	0	0	0	0	0
	796	0	0	0	0	0	0	0	0	0	0	0	0	0	0	0	0	0	0	0	0									796	0	0	0	0	0	0	0	0	0	0	0	0	0	0	0	0	0	0	0
	797	0	0	0	0	0	0	0	0	0	0	0	0	0	0	0	0	0	0	0	0									797	0	0	0	0	0	0	0	0	0	0	0	0	0	0	0	0	0	0	0
	798	0	0	0	0	0	0	0	0	0	0	0	0	0	0	0	0	0	0	0	0									798	0	0	0	0	0	0	0	0	0	0	0	0	0	0	0	0	0	0	0
	799	0	0	0	0	0	0	0	0	0	0	0	0	0	0	0	0	0	0	0	0									799	0	0	0	0	0	0	0	0	0	0	0	0	0	0	0	0	0	0	0
	800	0	0	0	0	0	0	0	0	0	0	0	0	0	0	0	0	0	0	0	0									800	0	0	0	0	0	0	0	0	0	0	0	0	0	0	0	0	0	0	0
	801	0	0	0	0	0	0	0	0	0	0	0	0	0	0	0	0	0	0	0	0									801	0	0	0	0	0	0	0	0	0	0	0	0	0	0	0	0	0	0	0
	802	0	0	0	0	0	0	0	0	0	0	0	0	0	0	0	0	0	0	0	0									802	0	0	0	0	0	0	0	0	0	0	0	0	0	0	0	0	0	0	0
	803	0	0	0	0	0	0	0	0	0	0	0	0	0	0	0	0	0	0	0	0									803	0	0	0	0	0	0	0	0	0	0	0	0	0	0	0	0	0	0	0
	804	0	0	0	0	0	0	0	0	0	0	0	0	0	0	0	0	0	0	0	0									804	0	0	0	0	0	0	0	0	0	0	0	0	0	0	0	0	0	0	0
	805	0	0	0	0	0	0	0	0	0	0	0	0	0	0	0	0	0	0	0	0									805	0	0	0	0	0	0	0	0	0	0	0	0	0	0	0	0	0	0	0
	806	0	0	0	0	0	0	0	0	0	0	0	0	0	0	0	0	0	0	0	0									806	0	0	0	0	0	0	0	0	0	0	0	0	0	0	0	0	0	0	0
	807	0	0	0	0	0	0	0	0	0	0	0	0	0	0	0	0	0	0	0	0									807	0	0	0	0	0	0	0	0	0	0	0	0	0	0	0	0	0	0	0
	808	0	0	0	0	0	0	0	0	0	0	0	0	0	0	0	0	0	0	0	0									808	0	0	0	0	0	0	0	0	0	0	0	0	0	0	0	0	0	0	0
	809	0	0	0	0	0	0	0	0	0	0	0	0	0	0	0	0	0	0	0	0									809	0	0	0	0	0	0	0	0	0	0	0	0	0	0	0	0	0	0	0
	810	0	0	0	0	0	0	0	0	0	0	0	0	0	0	0	0	0	0	0	0									810	0	0	0	0	0	0	0	0	0	0	0	0	0	0	0	0	0	0	0
	811	0	0	0	0	0	0	0	0	0	0	0	0	0	0	0	0	0	0	0	0									811	0	0	0	0	0	0	0	0	0	0	0	0	0	0	0	0	0	0	0
	812	0	0	0	0	0	0	0	0	0	0	0	0	0	0	0	0	0	0	0	0									812	0	0	0	0	0	0	0	0	0	0	0	0	0	0	0	0	0	0	0
	813	0	0	0	0	0	0	0	0	0	0	0	0	0	0	0	0	0	0	0	0									813	0	0	0	0	0	0	0	0	0	0	0	0	0	0	0	0	0	0	0
	814	0	0	0	0	0	0	0	0	0	0	0	0	0	0	0	0	0	0	0	0									814	0	0	0	0	0	0	0	0	0	0	0	0	0	0	0	0	0	0	0
	815	0	0	0	0	0	0	0	0	0	0	0	0	0	0	0	0	0	0	0	0									815	0	0	0	0	0	0	0	0	0	0	0	0	0	0	0	0	0	0	0
	816	0	0	0	0	0	0	0	0	0	0	0	0	0	0	0	0	0	0	0	0									816	0	0	0	0	0	0	0	0	0	0	0	0	0	0	0	0	0	0	0
	817	0	0	0	0	0	0	0	0	0	0	0	0	0	0	0	0	0	0	0	0									817	0	0	0	0	0	0	0	0	0	0	0	0	0	0	0	0	0	0	0
	818	0	0	0	0	0	0	0	0	0	0	0	0	0	0	0	0	0	0	0	0									818	0	0	0	0	0	0	0	0	0	0	0	0	0	0	0	0	0	0	0
	819	0	0	0	0	0	0	0	0	0	0	0	0	0	0	0	0	0	0	0	0									819	0	0	0	0	0	0	0	0	0	0	0	0	0	0	0	0	0	0	0
	820	0	0	0	0	0	0	0	0	0	0	0	0	0	0	0	0	0	0	0	0									820	0	0	0	0	0	0	0	0	0	0	0	0	0	0	0	0	0	0	0
	821	0	0	0	0	0	0	0	0	0	0	0	0	0	0	0	0	0	0	0	0									821	0	0	0	0	0	0	0	0	0	0	0	0	0	0	0	0	0	0	0
	822	0	0	0	0	0	0	0	0	0	0	0	0	0	0	0	0	0	0	0	0									822	0	0	0	0	0	0	0	0	0	0	0	0	0	0	0	0	0	0	0
	823	0	0	0	0	0	0	0	0	0	0	0	0	0	0	0	0	0	0	0	0									823	0	0	0	0	0	0	0	0	0	0	0	0	0	0	0	0	0	0	0
	824	0	0	0	0	0	0	0	0	0	0	0	0	0	0	0	0	0	0	0	0									824	0	0	0	0	0	0	0	0	0	0	0	0	0	0	0	0	0	0	0
	825	0	0	0	0	0	0	0	0	0	0	0	0	0	0	0	0	0	0	0	0									825	0	0	0	0	0	0	0	0	0	0	0	0	0	0	0	0	0	0	0
	826	0	0	0	0	0	0	0	0	0	0	0	0	0	0	0	0	0	0	0	0									826	0	0	0	0	0	0	0	0	0	0	0	0	0	0	0	0	0	0	0
	827	0	0	0	0	0	0	0	0	0	0	0	0	0	0	0	0	0	0	0	0									827	0	0	0	0	0	0	0	0	0	0	0	0	0	0	0	0	0	0	0
	828	0	0	0	0	0	0	0	0	0	0	0	0	0	0	0	0	0	0	0	0									828	0	0	0	0	0	0	0	0	0	0	0	0	0	0	0	0	0	0	0
	829	0	0	0	0	0	0	0	0	0	0	0	0	0	0	0	0	0	0	0	0									829	0	0	0	0	0	0	0	0	0	0	0	0	0	0	0	0	0	0	0
	830	0	0	0	0	0	0	0	0	0	0	0	0	0	0	0	0	0	0	0	0									830	0	0	0	0	0	0	0	0	0	0	0	0	0	0	0	0	0	0	0
	831	0	0	0	0	0	0	0	0	0	0	0	0	0	0	0	0	0	0	0	0									831	0	0	0	0	0	0	0	0	0	0	0	0	0	0	0	0	0	0	0
	832	0	0	0	0	0	0	0	0	0	0	0	0	0	0	0	0	0	0	0	0									832	0	0	0	0	0	0	0	0	0	0	0	0	0	0	0	0	0	0	0
	833	0	0	0	0	0	0	0	0	0	0	0	0	0	0	0	0	0	0	0	0									833	0	0	0	0	0	0	0	0	0	0	0	0	0	0	0	0	0	0	0
	834	0	0	0	0	0	0	0	0	0	0	0	0	0	0	0	0	0	0	0	0									834	0	0	0	0	0	0	0	0	0	0	0	0	0	0	0	0	0	0	0
	835	0	0	0	0	0	0	0	0	0	0	0	0	0	0	0	0	0	0	0	0									835	0	0	0	0	0	0	0	0	0	0	0	0	0	0	0	0	0	0	0
	836	0	0	0	0	0	0	0	0	0	0	0	0	0	0	0	0	0	0	0	0									836	0	0	0	0	0	0	0	0	0	0	0	0	0	0	0	0	0	0	0
	837	0	0	0	0	0	0	0	0	0	0	0	0	0	0	0	0	0	0	0	0									837	0	0	0	0	0	0	0	0	0	0	0	0	0	0	0	0	0	0	0
	838	0	0	0	0	0	0	0	0	0	0	0	0	0	0	0	0	0	0	0	0									838	0	0	0	0	0	0	0	0	0	0	0	0	0	0	0	0	0	0	0
	839	0	0	0	0	0	0	0	0	0	0	0	0	0	0	0	0	0	0	0	0									839	0	0	0	0	0	0	0	0	0	0	0	0	0	0	0	0	0	0	0
	840	0	0	0	0	0	0	0	0	0	0	0	0	0	0	0	0	0	0	0	0									840	0	0	0	0	0	0	0	0	0	0	0	0	0	0	0	0	0	0	0
	841	0	0	0	0	0	0	0	0	0	0	0	0	0	0	0	0	0	0	0	0									841	0	0	0	0	0	0	0	0	0	0	0	0	0	0	0	0	0	0	0
	842	0	0	0	0	0	0	0	0	0	0	0	0	0	0	0	0	0	0	0	0									842	0	0	0	0	0	0	0	0	0	0	0	0	0	0	0	0	0	0	0
	843	0	0	0	0	0	0	0	0	0	0	0	0	0	0	0	0	0	0	0	0									843	0	0	0	0	0	0	0	0	0	0	0	0	0	0	0	0	0	0	0
	844	0	0	0	0	0	0	0	0	0	0	0	0	0	0	0	0	0	0	0	0									844	0	0	0	0	0	0	0	0	0	0	0	0	0	0	0	0	0	0	0
	845	0	0	0	0	0	0	0	0	0	0	0	0	0	0	0	0	0	0	0	0									845	0	0	0	0	0	0	0	0	0	0	0	0	0	0	0	0	0	0	0
	846	0	0	0	0	0	0	0	0	0	0	0	0	0	0	0	0	0	0	0	0									846	0	0	0	0	0	0	0	0	0	0	0	0	0	0	0	0	0	0	0
	847	0	0	0	0	0	0	0	0	0	0	0	0	0	0	0	0	0	0	0	0									847	0	0	0	0	0	0	0	0	0	0	0	0	0	0	0	0	0	0	0
	848	0	0	0	0	0	0	0	0	0	0	0	0	0	0	0	0	0	0	0	0									848	0	0	0	0	0	0	0	0	0	0	0	0	0	0	0	0	0	0	0
	849	0	0	0	0	0	0	0	0	0	0	0	0	0	0	0	0	0	0	0	0									849	0	0	0	0	0	0	0	0	0	0	0	0	0	0	0	0	0	0	0
	850	0	0	0	0	0	0	0	0	0	0	0	0	0	0	0	0	0	0	0	0									850	0	0	0	0	0	0	0	0	0	0	0	0	0	0	0	0	0	0	0
	851	0	0	0	0	0	0	0	0	0	0	0	0	0	0	0	0	0	0	0	0									851	0	0	0	0	0	0	0	0	0	0	0	0	0	0	0	0	0	0	0
	852	0	0	0	0	0	0	0	0	0	0	0	0	0	0	0	0	0	0	0	0									852	0	0	0	0	0	0	0	0	0	0	0	0	0	0	0	0	0	0	0
	853	0	0	0	0	0	0	0	0	0	0	0	0	0	0	0	0	0	0	0	0									853	0	0	0	0	0	0	0	0	0	0	0	0	0	0	0	0	0	0	0
	854	0	0	0	0	0	0	0	0	0	0	0	0	0	0	0	0	0	0	0	0									854	0	0	0	0	0	0	0	0	0	0	0	0	0	0	0	0	0	0	0
	855	0	0	0	0	0	0	0	0	0	0	0	0	0	0	0	0	0	0	0	0									855	0	0	0	0	0	0	0	0	0	0	0	0	0	0	0	0	0	0	0
	856	0	0	0	0	0	0	0	0	0	0	0	0	0	0	0	0	0	0	0	0									856	0	0	0	0	0	0	0	0	0	0	0	0	0	0	0	0	0	0	0
	857	0	0	0	0	0	0	0	0	0	0	0	0	0	0	0	0	0	0	0	0									857	0	0	0	0	0	0	0	0	0	0	0	0	0	0	0	0	0	0	0
	858	0	0	0	0	0	0	0	0	0	0	0	0	0	0	0	0	0	0	0	0									858	0	0	0	0	0	0	0	0	0	0	0	0	0	0	0	0	0	0	0
	859	0	0	0	0	0	0	0	0	0	0	0	0	0	0	0	0	0	0	0	0									859	0	0	0	0	0	0	0	0	0	0	0	0	0	0	0	0	0	0	0
	860	0	0	0	0	0	0	0	0	0	0	0	0	0	0	0	0	0	0	0	0									860	0	0	0	0	0	0	0	0	0	0	0	0	0	0	0	0	0	0	0
	861	0	0	0	0	0	0	0	0	0	0	0	0	0	0	0	0	0	0	0	0									861	0	0	0	0	0	0	0	0	0	0	0	0	0	0	0	0	0	0	0
	862	0	0	0	0	0	0	0	0	0	0	0	0	0	0	0	0	0	0	0	0									862	0	0	0	0	0	0	0	0	0	0	0	0	0	0	0	0	0	0	0
	863	0	0	0	0	0	0	0	0	0	0	0	0	0	0	0	0	0	0	0	0									863	0	0	0	0	0	0	0	0	0	0	0	0	0	0	0	0	0	0	0
	864	0	0	0	0	0	0	0	0	0	0	0	0	0	0	0	0	0	0	0	0									864	0	0	0	0	0	0	0	0	0	0	0	0	0	0	0	0	0	0	0
	865	0	0	0	0	0	0	0	0	0	0	0	0	0	0	0	0	0	0	0	0									865	0	0	0	0	0	0	0	0	0	0	0	0	0	0	0	0	0	0	0
	866	0	0	0	0	0	0	0	0	0	0	0	0	0	0	0	0	0	0	0	0									866	0	0	0	0	0	0	0	0	0	0	0	0	0	0	0	0	0	0	0
	867	0	0	0	0	0	0	0	0	0	0	0	0	0	0	0	0	0	0	0	0									867	0	0	0	0	0	0	0	0	0	0	0	0	0	0	0	0	0	0	0
	868	0	0	0	0	0	0	0	0	0	0	0	0	0	0	0	0	0	0	0	0									868	0	0	0	0	0	0	0	0	0	0	0	0	0	0	0	0	0	0	0
	869	0	0	0	0	0	0	0	0	0	0	0	0	0	0	0	0	0	0	0	0									869	0	0	0	0	0	0	0	0	0	0	0	0	0	0	0	0	0	0	0
	870	0	0	0	0	0	0	0	0	0	0	0	0	0	0	0	0	0	0	0	0									870	0	0	0	0	0	0	0	0	0	0	0	0	0	0	0	0	0	0	0
	871	0	0	0	0	0	0	0	0	0	0	0	0	0	0	0	0	0	0	0	0									871	0	0	0	0	0	0	0	0	0	0	0	0	0	0	0	0	0	0	0
	872	0	0	0	0	0	0	0	0	0	0	0	0	0	0	0	0	0	0	0	0									872	0	0	0	0	0	0	0	0	0	0	0	0	0	0	0	0	0	0	0
	873	0	0	0	0	0	0	0	0	0	0	0	0	0	0	0	0	0	0	0	0									873	0	0	0	0	0	0	0	0	0	0	0	0	0	0	0	0	0	0	0
	874	0	0	0	0	0	0	0	0	0	0	0	0	0	0	0	0	0	0	0	0									874	0	0	0	0	0	0	0	0	0	0	0	0	0	0	0	0	0	0	0
	875	0	0	0	0	0	0	0	0	0	0	0	0	0	0	0	0	0	0	0	0									875	0	0	0	0	0	0	0	0	0	0	0	0	0	0	0	0	0	0	0
	876	0	0	0	0	0	0	0	0	0	0	0	0	0	0	0	0	0	0	0	0									876	0	0	0	0	0	0	0	0	0	0	0	0	0	0	0	0	0	0	0
	877	0	0	0	0	0	0	0	0	0	0	0	0	0	0	0	0	0	0	0	0									877	0	0	0	0	0	0	0	0	0	0	0	0	0	0	0	0	0	0	0
	878	0	0	0	0	0	0	0	0	0	0	0	0	0	0	0	0	0	0	0	0									878	0	0	0	0	0	0	0	0	0	0	0	0	0	0	0	0	0	0	0
	879	0	0	0	0	0	0	0	0	0	0	0	0	0	0	0	0	0	0	0	0									879	0	0	0	0	0	0	0	0	0	0	0	0	0	0	0	0	0	0	0
	880	0	0	0	0	0	0	0	0	0	0	0	0	0	0	0	0	0	0	0	0									880	0	0	0	0	0	0	0	0	0	0	0	0	0	0	0	0	0	0	0
	881	0	0	0	0	0	0	0	0	0	0	0	0	0	0	0	0	0	0	0	0									881	0	0	0	0	0	0	0	0	0	0	0	0	0	0	0	0	0	0	0
	882	0	0	0	0	0	0	0	0	0	0	0	0	0	0	0	0	0	0	0	0									882	0	0	0	0	0	0	0	0	0	0	0	0	0	0	0	0	0	0	0
	883	0	0	0	0	0	0	0	0	0	0	0	0	0	0	0	0	0	0	0	0									883	0	0	0	0	0	0	0	0	0	0	0	0	0	0	0	0	0	0	0
	884	0	0	0	0	0	0	0	0	0	0	0	0	0	0	0	0	0	0	0	0									884	0	0	0	0	0	0	0	0	0	0	0	0	0	0	0	0	0	0	0
	885	0	0	0	0	0	0	0	0	0	0	0	0	0	0	0	0	0	0	0	0									885	0	0	0	0	0	0	0	0	0	0	0	0	0	0	0	0	0	0	0
	886	0	0	0	0	0	0	0	0	0	0	0	0	0	0	0	0	0	0	0	0									886	0	0	0	0	0	0	0	0	0	0	0	0	0	0	0	0	0	0	0
	887	0	0	0	0	0	0	0	0	0	0	0	0	0	0	0	0	0	0	0	0									887	0	0	0	0	0	0	0	0	0	0	0	0	0	0	0	0	0	0	0
	888	0	0	0	0	0	0	0	0	0	0	0	0	0	0	0	0	0	0	0	0									888	0	0	0	0	0	0	0	0	0	0	0	0	0	0	0	0	0	0	0
	889	0	0	0	0	0	0	0	0	0	0	0	0	0	0	0	0	0	0	0	0									889	0	0	0	0	0	0	0	0	0	0	0	0	0	0	0	0	0	0	0
	890	0	0	0	0	0	0	0	0	0	0	0	0	0	0	0	0	0	0	0	0									890	0	0	0	0	0	0	0	0	0	0	0	0	0	0	0	0	0	0	0
	891	0	0	0	0	0	0	0	0	0	0	0	0	0	0	0	0	0	0	0	0									891	0	0	0	0	0	0	0	0	0	0	0	0	0	0	0	0	0	0	0
	892	0	0	0	0	0	0	0	0	0	0	0	0	0	0	0	0	0	0	0	0									892	0	0	0	0	0	0	0	0	0	0	0	0	0	0	0	0	0	0	0
	893	0	0	0	0	0	0	0	0	0	0	0	0	0	0	0	0	0	0	0	0									893	0	0	0	0	0	0	0	0	0	0	0	0	0	0	0	0	0	0	0
	894	0	0	0	0	0	0	0	0	0	0	0	0	0	0	0	0	0	0	0	0									894	0	0	0	0	0	0	0	0	0	0	0	0	0	0	0	0	0	0	0
	895	0	0	0	0	0	0	0	0	0	0	0	0	0	0	0	0	0	0	0	0									895	0	0	0	0	0	0	0	0	0	0	0	0	0	0	0	0	0	0	0
	896	0	0	0	0	0	0	0	0	0	0	0	0	0	0	0	0	0	0	0	0									896	0	0	0	0	0	0	0	0	0	0	0	0	0	0	0	0	0	0	0
	897	0	0	0	0	0	0	0	0	0	0	0	0	0	0	0	0	0	0	0	0									897	0	0	0	0	0	0	0	0	0	0	0	0	0	0	0	0	0	0	0
	898	0	0	0	0	0	0	0	0	0	0	0	0	0	0	0	0	0	0	0	0									898	0	0	0	0	0	0	0	0	0	0	0	0	0	0	0	0	0	0	0
	899	0	0	0	0	0	0	0	0	0	0	0	0	0	0	0	0	0	0	0	0									899	0	0	0	0	0	0	0	0	0	0	0	0	0	0	0	0	0	0	0
	900	0	0	0	0	0	0	0	0	0	0	0	0	0	0	0	0	0	0	0	0									900	0	0	0	0	0	0	0	0	0	0	0	0	0	0	0	0	0	0	0
	901	0	0	0	0	0	0	0	0	0	0	0	0	0	0	0	0	0	0	0	0									901	0	0	0	0	0	0	0	0	0	0	0	0	0	0	0	0	0	0	0
	902	0	0	0	0	0	0	0	0	0	0	0	0	0	0	0	0	0	0	0	0									902	0	0	0	0	0	0	0	0	0	0	0	0	0	0	0	0	0	0	0
	903	0	0	0	0	0	0	0	0	0	0	0	0	0	0	0	0	0	0	0	0									903	0	0	0	0	0	0	0	0	0	0	0	0	0	0	0	0	0	0	0
	904	0	0	0	0	0	0	0	0	0	0	0	0	0	0	0	0	0	0	0	0									904	0	0	0	0	0	0	0	0	0	0	0	0	0	0	0	0	0	0	0
	905	0	0	0	0	0	0	0	0	0	0	0	0	0	0	0	0	0	0	0	0									905	0	0	0	0	0	0	0	0	0	0	0	0	0	0	0	0	0	0	0
	906	0	0	0	0	0	0	0	0	0	0	0	0	0	0	0	0	0	0	0	0									906	0	0	0	0	0	0	0	0	0	0	0	0	0	0	0	0	0	0	0
	907	0	0	0	0	0	0	0	0	0	0	0	0	0	0	0	0	0	0	0	0									907	0	0	0	0	0	0	0	0	0	0	0	0	0	0	0	0	0	0	0
	908	0	0	0	0	0	0	0	0	0	0	0	0	0	0	0	0	0	0	0	0									908	0	0	0	0	0	0	0	0	0	0	0	0	0	0	0	0	0	0	0
	909	0	0	0	0	0	0	0	0	0	0	0	0	0	0	0	0	0	0	0	0									909	0	0	0	0	0	0	0	0	0	0	0	0	0	0	0	0	0	0	0
	910	0	0	0	0	0	0	0	0	0	0	0	0	0	0	0	0	0	0	0	0									910	0	0	0	0	0	0	0	0	0	0	0	0	0	0	0	0	0	0	0
	911	0	0	0	0	0	0	0	0	0	0	0	0	0	0	0	0	0	0	0	0									911	0	0	0	0	0	0	0	0	0	0	0	0	0	0	0	0	0	0	0
	912	0	0	0	0	0	0	0	0	0	0	0	0	0	0	0	0	0	0	0	0									912	0	0	0	0	0	0	0	0	0	0	0	0	0	0	0	0	0	0	0
	913	0	0	0	0	0	0	0	0	0	0	0	0	0	0	0	0	0	0	0	0									913	0	0	0	0	0	0	0	0	0	0	0	0	0	0	0	0	0	0	0
	914	0	0	0	0	0	0	0	0	0	0	0	0	0	0	0	0	0	0	0	0									914	0	0	0	0	0	0	0	0	0	0	0	0	0	0	0	0	0	0	0
	915	0	0	0	0	0	0	0	0	0	0	0	0	0	0	0	0	0	0	0	0									915	0	0	0	0	0	0	0	0	0	0	0	0	0	0	0	0	0	0	0
	916	0	0	0	0	0	0	0	0	0	0	0	0	0	0	0	0	0	0	0	0									916	0	0	0	0	0	0	0	0	0	0	0	0	0	0	0	0	0	0	0
	917	0	0	0	0	0	0	0	0	0	0	0	0	0	0	0	0	0	0	0	0									917	0	0	0	0	0	0	0	0	0	0	0	0	0	0	0	0	0	0	0
	918	0	0	0	0	0	0	0	0	0	0	0	0	0	0	0	0	0	0	0	0									918	0	0	0	0	0	0	0	0	0	0	0	0	0	0	0	0	0	0	0
	919	0	0	0	0	0	0	0	0	0	0	0	0	0	0	0	0	0	0	0	0									919	0	0	0	0	0	0	0	0	0	0	0	0	0	0	0	0	0	0	0
	920	0	0	0	0	0	0	0	0	0	0	0	0	0	0	0	0	0	0	0	0									920	0	0	0	0	0	0	0	0	0	0	0	0	0	0	0	0	0	0	0
	921	0	0	0	0	0	0	0	0	0	0	0	0	0	0	0	0	0	0	0	0									921	0	0	0	0	0	0	0	0	0	0	0	0	0	0	0	0	0	0	0
	922	0	0	0	0	0	0	0	0	0	0	0	0	0	0	0	0	0	0	0	0									922	0	0	0	0	0	0	0	0	0	0	0	0	0	0	0	0	0	0	0
	923	0	0	0	0	0	0	0	0	0	0	0	0	0	0	0	0	0	0	0	0									923	0	0	0	0	0	0	0	0	0	0	0	0	0	0	0	0	0	0	0
	924	0	0	0	0	0	0	0	0	0	0	0	0	0	0	0	0	0	0	0	0									924	0	0	0	0	0	0	0	0	0	0	0	0	0	0	0	0	0	0	0
	925	0	0	0	0	0	0	0	0	0	0	0	0	0	0	0	0	0	0	0	0									925	0	0	0	0	0	0	0	0	0	0	0	0	0	0	0	0	0	0	0
	926	0	0	0	0	0	0	0	0	0	0	0	0	0	0	0	0	0	0	0	0									926	0	0	0	0	0	0	0	0	0	0	0	0	0	0	0	0	0	0	0
	927	0	0	0	0	0	0	0	0	0	0	0	0	0	0	0	0	0	0	0	0									927	0	0	0	0	0	0	0	0	0	0	0	0	0	0	0	0	0	0	0
	928	0	0	0	0	0	0	0	0	0	0	0	0	0	0	0	0	0	0	0	0									928	0	0	0	0	0	0	0	0	0	0	0	0	0	0	0	0	0	0	0
	929	0	0	0	0	0	0	0	0	0	0	0	0	0	0	0	0	0	0	0	0									929	0	0	0	0	0	0	0	0	0	0	0	0	0	0	0	0	0	0	0
	930	0	0	0	0	0	0	0	0	0	0	0	0	0	0	0	0	0	0	0	0									930	0	0	0	0	0	0	0	0	0	0	0	0	0	0	0	0	0	0	0
	931	0	0	0	0	0	0	0	0	0	0	0	0	0	0	0	0	0	0	0	0									931	0	0	0	0	0	0	0	0	0	0	0	0	0	0	0	0	0	0	0
	932	0	0	0	0	0	0	0	0	0	0	0	0	0	0	0	0	0	0	0	0									932	0	0	0	0	0	0	0	0	0	0	0	0	0	0	0	0	0	0	0
	933	0	0	0	0	0	0	0	0	0	0	0	0	0	0	0	0	0	0	0	0									933	0	0	0	0	0	0	0	0	0	0	0	0	0	0	0	0	0	0	0
	934	0	0	0	0	0	0	0	0	0	0	0	0	0	0	0	0	0	0	0	0									934	0	0	0	0	0	0	0	0	0	0	0	0	0	0	0	0	0	0	0
	935	0	0	0	0	0	0	0	0	0	0	0	0	0	0	0	0	0	0	0	0									935	0	0	0	0	0	0	0	0	0	0	0	0	0	0	0	0	0	0	0
	936	0	0	0	0	0	0	0	0	0	0	0	0	0	0	0	0	0	0	0	0									936	0	0	0	0	0	0	0	0	0	0	0	0	0	0	0	0	0	0	0
	937	0	0	0	0	0	0	0	0	0	0	0	0	0	0	0	0	0	0	0	0									937	0	0	0	0	0	0	0	0	0	0	0	0	0	0	0	0	0	0	0
	938	0	0	0	0	0	0	0	0	0	0	0	0	0	0	0	0	0	0	0	0									938	0	0	0	0	0	0	0	0	0	0	0	0	0	0	0	0	0	0	0
	939	0	0	0	0	0	0	0	0	0	0	0	0	0	0	0	0	0	0	0	0									939	0	0	0	0	0	0	0	0	0	0	0	0	0	0	0	0	0	0	0
	940	0	0	0	0	0	0	0	0	0	0	0	0	0	0	0	0	0	0	0	0									940	0	0	0	0	0	0	0	0	0	0	0	0	0	0	0	0	0	0	0
	941	0	0	0	0	0	0	0	0	0	0	0	0	0	0	0	0	0	0	0	0									941	0	0	0	0	0	0	0	0	0	0	0	0	0	0	0	0	0	0	0
	942	0	0	0	0	0	0	0	0	0	0	0	0	0	0	0	0	0	0	0	0									942	0	0	0	0	0	0	0	0	0	0	0	0	0	0	0	0	0	0	0
	943	0	0	0	0	0	0	0	0	0	0	0	0	0	0	0	0	0	0	0	0									943	0	0	0	0	0	0	0	0	0	0	0	0	0	0	0	0	0	0	0
	944	0	0	0	0	0	0	0	0	0	0	0	0	0	0	0	0	0	0	0	0									944	0	0	0	0	0	0	0	0	0	0	0	0	0	0	0	0	0	0	0
	945	0	0	0	0	0	0	0	0	0	0	0	0	0	0	0	0	0	0	0	0									945	0	0	0	0	0	0	0	0	0	0	0	0	0	0	0	0	0	0	0
	946	0	0	0	0	0	0	0	0	0	0	0	0	0	0	0	0	0	0	0	0									946	0	0	0	0	0	0	0	0	0	0	0	0	0	0	0	0	0	0	0
	947	0	0	0	0	0	0	0	0	0	0	0	0	0	0	0	0	0	0	0	0									947	0	0	0	0	0	0	0	0	0	0	0	0	0	0	0	0	0	0	0
	948	0	0	0	0	0	0	0	0	0	0	0	0	0	0	0	0	0	0	0	0									948	0	0	0	0	0	0	0	0	0	0	0	0	0	0	0	0	0	0	0
	949	0	0	0	0	0	0	0	0	0	0	0	0	0	0	0	0	0	0	0	0									949	0	0	0	0	0	0	0	0	0	0	0	0	0	0	0	0	0	0	0
	950	0	0	0	0	0	0	0	0	0	0	0	0	0	0	0	0	0	0	0	0									950	0	0	0	0	0	0	0	0	0	0	0	0	0	0	0	0	0	0	0
	951	0	0	0	0	0	0	0	0	0	0	0	0	0	0	0	0	0	0	0	0									951	0	0	0	0	0	0	0	0	0	0	0	0	0	0	0	0	0	0	0
	952	0	0	0	0	0	0	0	0	0	0	0	0	0	0	0	0	0	0	0	0									952	0	0	0	0	0	0	0	0	0	0	0	0	0	0	0	0	0	0	0
	953	0	0	0	0	0	0	0	0	0	0	0	0	0	0	0	0	0	0	0	0									953	0	0	0	0	0	0	0	0	0	0	0	0	0	0	0	0	0	0	0
	954	0	0	0	0	0	0	0	0	0	0	0	0	0	0	0	0	0	0	0	0									954	0	0	0	0	0	0	0	0	0	0	0	0	0	0	0	0	0	0	0
	955	0	0	0	0	0	0	0	0	0	0	0	0	0	0	0	0	0	0	0	0									955	0	0	0	0	0	0	0	0	0	0	0	0	0	0	0	0	0	0	0
	956	0	0	0	0	0	0	0	0	0	0	0	0	0	0	0	0	0	0	0	0									956	0	0	0	0	0	0	0	0	0	0	0	0	0	0	0	0	0	0	0
	957	0	0	0	0	0	0	0	0	0	0	0	0	0	0	0	0	0	0	0	0									957	0	0	0	0	0	0	0	0	0	0	0	0	0	0	0	0	0	0	0
	958	0	0	0	0	0	0	0	0	0	0	0	0	0	0	0	0	0	0	0	0									958	0	0	0	0	0	0	0	0	0	0	0	0	0	0	0	0	0	0	0
	959	0	0	0	0	0	0	0	0	0	0	0	0	0	0	0	0	0	0	0	0									959	0	0	0	0	0	0	0	0	0	0	0	0	0	0	0	0	0	0	0
	960	0	0	0	0	0	0	0	0	0	0	0	0	0	0	0	0	0	0	0	0									960	0	0	0	0	0	0	0	0	0	0	0	0	0	0	0	0	0	0	0
	961	0	0	0	0	0	0	0	0	0	0	0	0	0	0	0	0	0	0	0	0									961	0	0	0	0	0	0	0	0	0	0	0	0	0	0	0	0	0	0	0
	962	0	0	0	0	0	0	0	0	0	0	0	0	0	0	0	0	0	0	0	0									962	0	0	0	0	0	0	0	0	0	0	0	0	0	0	0	0	0	0	0
	963	0	0	0	0	0	0	0	0	0	0	0	0	0	0	0	0	0	0	0	0									963	0	0	0	0	0	0	0	0	0	0	0	0	0	0	0	0	0	0	0
	964	0	0	0	0	0	0	0	0	0	0	0	0	0	0	0	0	0	0	0	0									964	0	0	0	0	0	0	0	0	0	0	0	0	0	0	0	0	0	0	0
	965	0	0	0	0	0	0	0	0	0	0	0	0	0	0	0	0	0	0	0	0									965	0	0	0	0	0	0	0	0	0	0	0	0	0	0	0	0	0	0	0
	966	0	0	0	0	0	0	0	0	0	0	0	0	0	0	0	0	0	0	0	0									966	0	0	0	0	0	0	0	0	0	0	0	0	0	0	0	0	0	0	0
	967	0	0	0	0	0	0	0	0	0	0	0	0	0	0	0	0	0	0	0	0									967	0	0	0	0	0	0	0	0	0	0	0	0	0	0	0	0	0	0	0
	968	0	0	0	0	0	0	0	0	0	0	0	0	0	0	0	0	0	0	0	0									968	0	0	0	0	0	0	0	0	0	0	0	0	0	0	0	0	0	0	0
	969	0	0	0	0	0	0	0	0	0	0	0	0	0	0	0	0	0	0	0	0									969	0	0	0	0	0	0	0	0	0	0	0	0	0	0	0	0	0	0	0
	970	0	0	0	0	0	0	0	0	0	0	0	0	0	0	0	0	0	0	0	0									970	0	0	0	0	0	0	0	0	0	0	0	0	0	0	0	0	0	0	0
	971	0	0	0	0	0	0	0	0	0	0	0	0	0	0	0	0	0	0	0	0									971	0	0	0	0	0	0	0	0	0	0	0	0	0	0	0	0	0	0	0
	972	0	0	0	0	0	0	0	0	0	0	0	0	0	0	0	0	0	0	0	0									972	0	0	0	0	0	0	0	0	0	0	0	0	0	0	0	0	0	0	0
	973	0	0	0	0	0	0	0	0	0	0	0	0	0	0	0	0	0	0	0	0									973	0	0	0	0	0	0	0	0	0	0	0	0	0	0	0	0	0	0	0
	974	0	0	0	0	0	0	0	0	0	0	0	0	0	0	0	0	0	0	0	0									974	0	0	0	0	0	0	0	0	0	0	0	0	0	0	0	0	0	0	0
	975	0	0	0	0	0	0	0	0	0	0	0	0	0	0	0	0	0	0	0	0									975	0	0	0	0	0	0	0	0	0	0	0	0	0	0	0	0	0	0	0
	976	0	0	0	0	0	0	0	0	0	0	0	0	0	0	0	0	0	0	0	0									976	0	0	0	0	0	0	0	0	0	0	0	0	0	0	0	0	0	0	0
	977	0	0	0	0	0	0	0	0	0	0	0	0	0	0	0	0	0	0	0	0									977	0	0	0	0	0	0	0	0	0	0	0	0	0	0	0	0	0	0	0
	978	0	0	0	0	0	0	0	0	0	0	0	0	0	0	0	0	0	0	0	0									978	0	0	0	0	0	0	0	0	0	0	0	0	0	0	0	0	0	0	0
	979	0	0	0	0	0	0	0	0	0	0	0	0	0	0	0	0	0	0	0	0									979	0	0	0	0	0	0	0	0	0	0	0	0	0	0	0	0	0	0	0
	980	0	0	0	0	0	0	0	0	0	0	0	0	0	0	0	0	0	0	0	0									980	0	0	0	0	0	0	0	0	0	0	0	0	0	0	0	0	0	0	0
	981	0	0	0	0	0	0	0	0	0	0	0	0	0	0	0	0	0	0	0	0									981	0	0	0	0	0	0	0	0	0	0	0	0	0	0	0	0	0	0	0
	982	0	0	0	0	0	0	0	0	0	0	0	0	0	0	0	0	0	0	0	0									982	0	0	0	0	0	0	0	0	0	0	0	0	0	0	0	0	0	0	0
	983	0	0	0	0	0	0	0	0	0	0	0	0	0	0	0	0	0	0	0	0									983	0	0	0	0	0	0	0	0	0	0	0	0	0	0	0	0	0	0	0
	984	0	0	0	0	0	0	0	0	0	0	0	0	0	0	0	0	0	0	0	0									984	0	0	0	0	0	0	0	0	0	0	0	0	0	0	0	0	0	0	0
	985	0	0	0	0	0	0	0	0	0	0	0	0	0	0	0	0	0	0	0	0									985	0	0	0	0	0	0	0	0	0	0	0	0	0	0	0	0	0	0	0
	986	0	0	0	0	0	0	0	0	0	0	0	0	0	0	0	0	0	0	0	0									986	0	0	0	0	0	0	0	0	0	0	0	0	0	0	0	0	0	0	0
	987	0	0	0	0	0	0	0	0	0	0	0	0	0	0	0	0	0	0	0	0									987	0	0	0	0	0	0	0	0	0	0	0	0	0	0	0	0	0	0	0
	988	0	0	0	0	0	0	0	0	0	0	0	0	0	0	0	0	0	0	0	0									988	0	0	0	0	0	0	0	0	0	0	0	0	0	0	0	0	0	0	0
	989	0	0	0	0	0	0	0	0	0	0	0	0	0	0	0	0	0	0	0	0									989	0	0	0	0	0	0	0	0	0	0	0	0	0	0	0	0	0	0	0
	990	0	0	0	0	0	0	0	0	0	0	0	0	0	0	0	0	0	0	0	0									990	0	0	0	0	0	0	0	0	0	0	0	0	0	0	0	0	0	0	0
	991	0	0	0	0	0	0	0	0	0	0	0	0	0	0	0	0	0	0	0	0									991	0	0	0	0	0	0	0	0	0	0	0	0	0	0	0	0	0	0	0
	992	0	0	0	0	0	0	0	0	0	0	0	0	0	0	0	0	0	0	0	0									992	0	0	0	0	0	0	0	0	0	0	0	0	0	0	0	0	0	0	0
	993	0	0	0	0	0	0	0	0	0	0	0	0	0	0	0	0	0	0	0	0									993	0	0	0	0	0	0	0	0	0	0	0	0	0	0	0	0	0	0	0
	994	0	0	0	0	0	0	0	0	0	0	0	0	0	0	0	0	0	0	0	0									994	0	0	0	0	0	0	0	0	0	0	0	0	0	0	0	0	0	0	0
	995	0	0	0	0	0	0	0	0	0	0	0	0	0	0	0	0	0	0	0	0									995	0	0	0	0	0	0	0	0	0	0	0	0	0	0	0	0	0	0	0
	996	0	0	0	0	0	0	0	0	0	0	0	0	0	0	0	0	0	0	0	0									996	0	0	0	0	0	0	0	0	0	0	0	0	0	0	0	0	0	0	0
	997	0	0	0	0	0	0	0	0	0	0	0	0	0	0	0	0	0	0	0	0									997	0	0	0	0	0	0	0	0	0	0	0	0	0	0	0	0	0	0	0
	998	0	0	0	0	0	0	0	0	0	0	0	0	0	0	0	0	0	0	0	0									998	0	0	0	0	0	0	0	0	0	0	0	0	0	0	0	0	0	0	0
	999	0	0	0	0	0	0	0	0	0	0	0	0	0	0	0	0	0	0	0	0									999	0	0	0	0	0	0	0	0	0	0	0	0	0	0	0	0	0	0	0
	1000	0	0	0	0	0	0	0	0	0	0	0	0	0	0	0	0	0	0	0	0									1000	0	0	0	0	0	0	0	0	0	0	0	0	0	0	0	0	0	0	0
	1001	0	0	0	0	0	0	0	0	0	0	0	0	0	0	0	0	0	0	0	0									1001	0	0	0	0	0	0	0	0	0	0	0	0	0	0	0	0	0	0	0
	1002	0	0	0	0	0	0	0	0	0	0	0	0	0	0	0	0	0	0	0	0									1002	0	0	0	0	0	0	0	0	0	0	0	0	0	0	0	0	0	0	0
	1003	0	0	0	0	0	0	0	0	0	0	0	0	0	0	0	0	0	0	0	0									1003	0	0	0	0	0	0	0	0	0	0	0	0	0	0	0	0	0	0	0
	1004	0	0	0	0	0	0	0	0	0	0	0	0	0	0	0	0	0	0	0	0									1004	0	0	0	0	0	0	0	0	0	0	0	0	0	0	0	0	0	0	0
	1005	0	0	0	0	0	0	0	0	0	0	0	0	0	0	0	0	0	0	0	0									1005	0	0	0	0	0	0	0	0	0	0	0	0	0	0	0	0	0	0	0
	1006	0	0	0	0	0	0	0	0	0	0	0	0	0	0	0	0	0	0	0	0									1006	0	0	0	0	0	0	0	0	0	0	0	0	0	0	0	0	0	0	0
	1007	0	0	0	0	0	0	0	0	0	0	0	0	0	0	0	0	0	0	0	0									1007	0	0	0	0	0	0	0	0	0	0	0	0	0	0	0	0	0	0	0
	1008	0	0	0	0	0	0	0	0	0	0	0	0	0	0	0	0	0	0	0	0									1008	0	0	0	0	0	0	0	0	0	0	0	0	0	0	0	0	0	0	0
	1009	0	0	0	0	0	0	0	0	0	0	0	0	0	0	0	0	0	0	0	0									1009	0	0	0	0	0	0	0	0	0	0	0	0	0	0	0	0	0	0	0
	1010	0	0	0	0	0	0	0	0	0	0	0	0	0	0	0	0	0	0	0	0									1010	0	0	0	0	0	0	0	0	0	0	0	0	0	0	0	0	0	0	0
	1011	0	0	0	0	0	0	0	0	0	0	0	0	0	0	0	0	0	0	0	0									1011	0	0	0	0	0	0	0	0	0	0	0	0	0	0	0	0	0	0	0
	1012	0	0	0	0	0	0	0	0	0	0	0	0	0	0	0	0	0	0	0	0									1012	0	0	0	0	0	0	0	0	0	0	0	0	0	0	0	0	0	0	0
	1013	0	0	0	0	0	0	0	0	0	0	0	0	0	0	0	0	0	0	0	0									1013	0	0	0	0	0	0	0	0	0	0	0	0	0	0	0	0	0	0	0
	1014	0	0	0	0	0	0	0	0	0	0	0	0	0	0	0	0	0	0	0	0									1014	0	0	0	0	0	0	0	0	0	0	0	0	0	0	0	0	0	0	0
	1015	0	0	0	0	0	0	0	0	0	0	0	0	0	0	0	0	0	0	0	0									1015	0	0	0	0	0	0	0	0	0	0	0	0	0	0	0	0	0	0	0
	1016	0	0	0	0	0	0	0	0	0	0	0	0	0	0	0	0	0	0	0	0									1016	0	0	0	0	0	0	0	0	0	0	0	0	0	0	0	0	0	0	0
	1017	0	0	0	0	0	0	0	0	0	0	0	0	0	0	0	0	0	0	0	0									1017	0	0	0	0	0	0	0	0	0	0	0	0	0	0	0	0	0	0	0
	1018	0	0	0	0	0	0	0	0	0	0	0	0	0	0	0	0	0	0	0	0									1018	0	0	0	0	0	0	0	0	0	0	0	0	0	0	0	0	0	0	0
	1019	0	0	0	0	0	0	0	0	0	0	0	0	0	0	0	0	0	0	0	0									1019	0	0	0	0	0	0	0	0	0	0	0	0	0	0	0	0	0	0	0
	1020	0	0	0	0	0	0	0	0	0	0	0	0	0	0	0	0	0	0	0	0									1020	0	0	0	0	0	0	0	0	0	0	0	0	0	0	0	0	0	0	0
	1021	0	0	0	0	0	0	0	0	0	0	0	0	0	0	0	0	0	0	0	0									1021	0	0	0	0	0	0	0	0	0	0	0	0	0	0	0	0	0	0	0
	1022	0	0	0	0	0	0	0	0	0	0	0	0	0	0	0	0	0	0	0	0									1022	0	0	0	0	0	0	0	0	0	0	0	0	0	0	0	0	0	0	0
	1023	0	0	0	0	0	0	0	0	0	0	0	0	0	0	0	0	0	0	0	0									1023	0	0	0	0	0	0	0	0	0	0	0	0	0	0	0	0	0	0	0
	1024	0	0	0	0	0	0	0	0	0	0	0	0	0	0	0	0	0	0	0	0									1024	0	0	0	0	0	0	0	0	0	0	0	0	0	0	0	0	0	0	0
	1025	0	0	0	0	0	0	0	0	0	0	0	0	0	0	0	0	0	0	0	0									1025	0	0	0	0	0	0	0	0	0	0	0	0	0	0	0	0	0	0	0
	1026	0	0	0	0	0	0	0	0	0	0	0	0	0	0	0	0	0	0	0	0									1026	0	0	0	0	0	0	0	0	0	0	0	0	0	0	0	0	0	0	0
	1027	0	0	0	0	0	0	0	0	0	0	0	0	0	0	0	0	0	0	0	0									1027	0	0	0	0	0	0	0	0	0	0	0	0	0	0	0	0	0	0	0
	1028	0	0	0	0	0	0	0	0	0	0	0	0	0	0	0	0	0	0	0	0									1028	0	0	0	0	0	0	0	0	0	0	0	0	0	0	0	0	0	0	0
	1029	0	0	0	0	0	0	0	0	0	0	0	0	0	0	0	0	0	0	0	0									1029	0	0	0	0	0	0	0	0	0	0	0	0	0	0	0	0	0	0	0
	1030	0	0	0	0	0	0	0	0	0	0	0	0	0	0	0	0	0	0	0	0									1030	0	0	0	0	0	0	0	0	0	0	0	0	0	0	0	0	0	0	0
	1031	0	0	0	0	0	0	0	0	0	0	0	0	0	0	0	0	0	0	0	0									1031	0	0	0	0	0	0	0	0	0	0	0	0	0	0	0	0	0	0	0
	1032	0	0	0	0	0	0	0	0	0	0	0	0	0	0	0	0	0	0	0	0									1032	0	0	0	0	0	0	0	0	0	0	0	0	0	0	0	0	0	0	0
	1033	0	0	0	0	0	0	0	0	0	0	0	0	0	0	0	0	0	0	0	0									1033	0	0	0	0	0	0	0	0	0	0	0	0	0	0	0	0	0	0	0
	1034	0	0	0	0	0	0	0	0	0	0	0	0	0	0	0	0	0	0	0	0									1034	0	0	0	0	0	0	0	0	0	0	0	0	0	0	0	0	0	0	0
	1035	0	0	0	0	0	0	0	0	0	0	0	0	0	0	0	0	0	0	0	0									1035	0	0	0	0	0	0	0	0	0	0	0	0	0	0	0	0	0	0	0
	1036	0	0	0	0	0	0	0	0	0	0	0	0	0	0	0	0	0	0	0	0									1036	0	0	0	0	0	0	0	0	0	0	0	0	0	0	0	0	0	0	0
	1037	0	0	0	0	0	0	0	0	0	0	0	0	0	0	0	0	0	0	0	0									1037	0	0	0	0	0	0	0	0	0	0	0	0	0	0	0	0	0	0	0
	1038	0	0	0	0	0	0	0	0	0	0	0	0	0	0	0	0	0	0	0	0									1038	0	0	0	0	0	0	0	0	0	0	0	0	0	0	0	0	0	0	0
	1039	0	0	0	0	0	0	0	0	0	0	0	0	0	0	0	0	0	0	0	0									1039	0	0	0	0	0	0	0	0	0	0	0	0	0	0	0	0	0	0	0
	1040	0	0	0	0	0	0	0	0	0	0	0	0	0	0	0	0	0	0	0	0									1040	0	0	0	0	0	0	0	0	0	0	0	0	0	0	0	0	0	0	0
	1041	0	0	0	0	0	0	0	0	0	0	0	0	0	0	0	0	0	0	0	0									1041	0	0	0	0	0	0	0	0	0	0	0	0	0	0	0	0	0	0	0
	1042	0	0	0	0	0	0	0	0	0	0	0	0	0	0	0	0	0	0	0	0									1042	0	0	0	0	0	0	0	0	0	0	0	0	0	0	0	0	0	0	0
	1043	0	0	0	0	0	0	0	0	0	0	0	0	0	0	0	0	0	0	0	0									1043	0	0	0	0	0	0	0	0	0	0	0	0	0	0	0	0	0	0	0
	1044	0	0	0	0	0	0	0	0	0	0	0	0	0	0	0	0	0	0	0	0									1044	0	0	0	0	0	0	0	0	0	0	0	0	0	0	0	0	0	0	0
	1045	0	0	0	0	0	0	0	0	0	0	0	0	0	0	0	0	0	0	0	0									1045	0	0	0	0	0	0	0	0	0	0	0	0	0	0	0	0	0	0	0
	1046	0	0	0	0	0	0	0	0	0	0	0	0	0	0	0	0	0	0	0	0									1046	0	0	0	0	0	0	0	0	0	0	0	0	0	0	0	0	0	0	0
	1047	0	0	0	0	0	0	0	0	0	0	0	0	0	0	0	0	0	0	0	0									1047	0	0	0	0	0	0	0	0	0	0	0	0	0	0	0	0	0	0	0
	1048	0	0	0	0	0	0	0	0	0	0	0	0	0	0	0	0	0	0	0	0									1048	0	0	0	0	0	0	0	0	0	0	0	0	0	0	0	0	0	0	0
	1049	0	0	0	0	0	0	0	0	0	0	0	0	0	0	0	0	0	0	0	0									1049	0	0	0	0	0	0	0	0	0	0	0	0	0	0	0	0	0	0	0
	1050	0	0	0	0	0	0	0	0	0	0	0	0	0	0	0	0	0	0	0	0									1050	0	0	0	0	0	0	0	0	0	0	0	0	0	0	0	0	0	0	0
	1051	0	0	0	0	0	0	0	0	0	0	0	0	0	0	0	0	0	0	0	0									1051	0	0	0	0	0	0	0	0	0	0	0	0	0	0	0	0	0	0	0
	1052	0	0	0	0	0	0	0	0	0	0	0	0	0	0	0	0	0	0	0	0									1052	0	0	0	0	0	0	0	0	0	0	0	0	0	0	0	0	0	0	0
	1053	0	0	0	0	0	0	0	0	0	0	0	0	0	0	0	0	0	0	0	0									1053	0	0	0	0	0	0	0	0	0	0	0	0	0	0	0	0	0	0	0
	1054	0	0	0	0	0	0	0	0	0	0	0	0	0	0	0	0	0	0	0	0									1054	0	0	0	0	0	0	0	0	0	0	0	0	0	0	0	0	0	0	0
	1055	0	0	0	0	0	0	0	0	0	0	0	0	0	0	0	0	0	0	0	0									1055	0	0	0	0	0	0	0	0	0	0	0	0	0	0	0	0	0	0	0
	1056	0	0	0	0	0	0	0	0	0	0	0	0	0	0	0	0	0	0	0	0									1056	0	0	0	0	0	0	0	0	0	0	0	0	0	0	0	0	0	0	0
	1057	0	0	0	0	0	0	0	0	0	0	0	0	0	0	0	0	0	0	0	0									1057	0	0	0	0	0	0	0	0	0	0	0	0	0	0	0	0	0	0	0
	1058	0	0	0	0	0	0	0	0	0	0	0	0	0	0	0	0	0	0	0	0									1058	0	0	0	0	0	0	0	0	0	0	0	0	0	0	0	0	0	0	0
	1059	0	0	0	0	0	0	0	0	0	0	0	0	0	0	0	0	0	0	0	0									1059	0	0	0	0	0	0	0	0	0	0	0	0	0	0	0	0	0	0	0
	1060	0	0	0	0	0	0	0	0	0	0	0	0	0	0	0	0	0	0	0	0									1060	0	0	0	0	0	0	0	0	0	0	0	0	0	0	0	0	0	0	0
	1061	0	0	0	0	0	0	0	0	0	0	0	0	0	0	0	0	0	0	0	0									1061	0	0	0	0	0	0	0	0	0	0	0	0	0	0	0	0	0	0	0
	1062	0	0	0	0	0	0	0	0	0	0	0	0	0	0	0	0	0	0	0	0									1062	0	0	0	0	0	0	0	0	0	0	0	0	0	0	0	0	0	0	0
	1063	0	0	0	0	0	0	0	0	0	0	0	0	0	0	0	0	0	0	0	0									1063	0	0	0	0	0	0	0	0	0	0	0	0	0	0	0	0	0	0	0
	1064	0	0	0	0	0	0	0	0	0	0	0	0	0	0	0	0	0	0	0	0									1064	0	0	0	0	0	0	0	0	0	0	0	0	0	0	0	0	0	0	0
	1065	0	0	0	0	0	0	0	0	0	0	0	0	0	0	0	0	0	0	0	0									1065	0	0	0	0	0	0	0	0	0	0	0	0	0	0	0	0	0	0	0
	1066	0	0	0	0	0	0	0	0	0	0	0	0	0	0	0	0	0	0	0	0									1066	0	0	0	0	0	0	0	0	0	0	0	0	0	0	0	0	0	0	0
	1067	0	0	0	0	0	0	0	0	0	0	0	0	0	0	0	0	0	0	0	0									1067	0	0	0	0	0	0	0	0	0	0	0	0	0	0	0	0	0	0	0
	1068	0	0	0	0	0	0	0	0	0	0	0	0	0	0	0	0	0	0	0	0									1068	0	0	0	0	0	0	0	0	0	0	0	0	0	0	0	0	0	0	0
	1069	0	0	0	0	0	0	0	0	0	0	0	0	0	0	0	0	0	0	0	0									1069	0	0	0	0	0	0	0	0	0	0	0	0	0	0	0	0	0	0	0
	1070	0	0	0	0	0	0	0	0	0	0	0	0	0	0	0	0	0	0	0	0
	1071	0	0	0	0	0	0	0	0	0	0	0	0	0	0	0	0	0	0	0	0
	1072	0	0	0	0	0	0	0	0	0	0	0	0	0	0	0	0	0	0	0	0
	1073	0	0	0	0	0	0	0	0	0	0	0	0	0	0	0	0	0	0	0	0
	1074	0	0	0	0	0	0	0	0	0	0	0	0	0	0	0	0	0	0	0	0
	1075	0	0	0	0	0	0	0	0	0	0	0	0	0	0	0	0	0	0	0	0
	1076	0	0	0	0	0	0	0	0	0	0	0	0	0	0	0	0	0	0	0	0
	1077	0	0	0	0	0	0	0	0	0	0	0	0	0	0	0	0	0	0	0	0
	1078	0	0	0	0	0	0	0	0	0	0	0	0	0	0	0	0	0	0	0	0
	1079	0	0	0	0	0	0	0	0	0	0	0	0	0	0	0	0	0	0	0	0
	1080	0	0	0	0	0	0	0	0	0	0	0	0	0	0	0	0	0	0	0	0
	1081	0	0	0	0	0	0	0	0	0	0	0	0	0	0	0	0	0	0	0	0
	1082	0	0	0	0	0	0	0	0	0	0	0	0	0	0	0	0	0	0	0	0
	1083	0	0	0	0	0	0	0	0	0	0	0	0	0	0	0	0	0	0	0	0
	1084	0	0	0	0	0	0	0	0	0	0	0	0	0	0	0	0	0	0	0	0
	1085	0	0	0	0	0	0	0	0	0	0	0	0	0	0	0	0	0	0	0	0
	1086	0	0	0	0	0	0	0	0	0	0	0	0	0	0	0	0	0	0	0	0
	1087	0	0	0	0	0	0	0	0	0	0	0	0	0	0	0	0	0	0	0	0
	1088	0	0	0	0	0	0	0	0	0	0	0	0	0	0	0	0	0	0	0	0
	1089	0	0	0	0	0	0	0	0	0	0	0	0	0	0	0	0	0	0	0	0
	1090	0	0	0	0	0	0	0	0	0	0	0	0	0	0	0	0	0	0	0	0
	1091	0	0	0	0	0	0	0	0	0	0	0	0	0	0	0	0	0	0	0	0
	1092	0	0	0	0	0	0	0	0	0	0	0	0	0	0	0	0	0	0	0	0
	1093	0	0	0	0	0	0	0	0	0	0	0	0	0	0	0	0	0	0	0	0
	1094	0	0	0	0	0	0	0	0	0	0	0	0	0	0	0	0	0	0	0	0
	1095	0	0	0	0	0	0	0	0	0	0	0	0	0	0	0	0	0	0	0	0
	1096	0	0	0	0	0	0	0	0	0	0	0	0	0	0	0	0	0	0	0	0
	1097	0	0	0	0	0	0	0	0	0	0	0	0	0	0	0	0	0	0	0	0
	1098	0	0	0	0	0	0	0	0	0	0	0	0	0	0	0	0	0	0	0	0
	1099	0	0	0	0	0	0	0	0	0	0	0	0	0	0	0	0	0	0	0	0
	1100	0	0	0	0	0	0	0	0	0	0	0	0	0	0	0	0	0	0	0	0
	1101	0	0	0	0	0	0	0	0	0	0	0	0	0	0	0	0	0	0	0	0
	1102	0	0	0	0	0	0	0	0	0	0	0	0	0	0	0	0	0	0	0	0
	1103	0	0	0	0	0	0	0	0	0	0	0	0	0	0	0	0	0	0	0	0
	1104	0	0	0	0	0	0	0	0	0	0	0	0	0	0	0	0	0	0	0	0
	1105	0	0	0	0	0	0	0	0	0	0	0	0	0	0	0	0	0	0	0	0
	1106	0	0	0	0	0	0	0	0	0	0	0	0	0	0	0	0	0	0	0	0
	1107	0	0	0	0	0	0	0	0	0	0	0	0	0	0	0	0	0	0	0	0
	1108	0	0	0	0	0	0	0	0	0	0	0	0	0	0	0	0	0	0	0	0
	1109	0	0	0	0	0	0	0	0	0	0	0	0	0	0	0	0	0	0	0	0
	1110	0	0	0	0	0	0	0	0	0	0	0	0	0	0	0	0	0	0	0	0
	1111	0	0	0	0	0	0	0	0	0	0	0	0	0	0	0	0	0	0	0	0
	1112	0	0	0	0	0	0	0	0	0	0	0	0	0	0	0	0	0	0	0	0
	1113	0	0	0	0	0	0	0	0	0	0	0	0	0	0	0	0	0	0	0	0
	1114	0	0	0	0	0	0	0	0	0	0	0	0	0	0	0	0	0	0	0	0
	1115	0	0	0	0	0	0	0	0	0	0	0	0	0	0	0	0	0	0	0	0
	1116	0	0	0	0	0	0	0	0	0	0	0	0	0	0	0	0	0	0	0	0
	1117	0	0	0	0	0	0	0	0	0	0	0	0	0	0	0	0	0	0	0	0
	1118	0	0	0	0	0	0	0	0	0	0	0	0	0	0	0	0	0	0	0	0
	1119	0	0	0	0	0	0	0	0	0	0	0	0	0	0	0	0	0	0	0	0
	1120	0	0	0	0	0	0	0	0	0	0	0	0	0	0	0	0	0	0	0	0
	1121	0	0	0	0	0	0	0	0	0	0	0	0	0	0	0	0	0	0	0	0
	1122	0	0	0	0	0	0	0	0	0	0	0	0	0	0	0	0	0	0	0	0
	1123	0	0	0	0	0	0	0	0	0	0	0	0	0	0	0	0	0	0	0	0
	1124	0	0	0	0	0	0	0	0	0	0	0	0	0	0	0	0	0	0	0	0
	1125	0	0	0	0	0	0	0	0	0	0	0	0	0	0	0	0	0	0	0	0
	1126	0	0	0	0	0	0	0	0	0	0	0	0	0	0	0	0	0	0	0	0
	1127	0	0	0	0	0	0	0	0	0	0	0	0	0	0	0	0	0	0	0	0
	1128	0	0	0	0	0	0	0	0	0	0	0	0	0	0	0	0	0	0	0	0
	1129	0	0	0	0	0	0	0	0	0	0	0	0	0	0	0	0	0	0	0	0
	1130	0	0	0	0	0	0	0	0	0	0	0	0	0	0	0	0	0	0	0	0
	1131	0	0	0	0	0	0	0	0	0	0	0	0	0	0	0	0	0	0	0	0
	1132	0	0	0	0	0	0	0	0	0	0	0	0	0	0	0	0	0	0	0	0
	1133	0	0	0	0	0	0	0	0	0	0	0	0	0	0	0	0	0	0	0	0
	1134	0	0	0	0	0	0	0	0	0	0	0	0	0	0	0	0	0	0	0	0
	1135	0	0	0	0	0	0	0	0	0	0	0	0	0	0	0	0	0	0	0	0
	1136	0	0	0	0	0	0	0	0	0	0	0	0	0	0	0	0	0	0	0	0
	1137	0	0	0	0	0	0	0	0	0	0	0	0	0	0	0	0	0	0	0	0
	1138	0	0	0	0	0	0	0	0	0	0	0	0	0	0	0	0	0	0	0	0
	1139	0	0	0	0	0	0	0	0	0	0	0	0	0	0	0	0	0	0	0	0
	1140	0	0	0	0	0	0	0	0	0	0	0	0	0	0	0	0	0	0	0	0
	1141	0	0	0	0	0	0	0	0	0	0	0	0	0	0	0	0	0	0	0	0
	1142	0	0	0	0	0	0	0	0	0	0	0	0	0	0	0	0	0	0	0	0
	1143	0	0	0	0	0	0	0	0	0	0	0	0	0	0	0	0	0	0	0	0
	1144	0	0	0	0	0	0	0	0	0	0	0	0	0	0	0	0	0	0	0	0
	1145	0	0	0	0	0	0	0	0	0	0	0	0	0	0	0	0	0	0	0	0
	1146	0	0	0	0	0	0	0	0	0	0	0	0	0	0	0	0	0	0	0	0
	1147	0	0	0	0	0	0	0	0	0	0	0	0	0	0	0	0	0	0	0	0
	1148	0	0	0	0	0	0	0	0	0	0	0	0	0	0	0	0	0	0	0	0
	1149	0	0	0	0	0	0	0	0	0	0	0	0	0	0	0	0	0	0	0	0
	1150	0	0	0	0	0	0	0	0	0	0	0	0	0	0	0	0	0	0	0	0
	1151	0	0	0	0	0	0	0	0	0	0	0	0	0	0	0	0	0	0	0	0
	1152	0	0	0	0	0	0	0	0	0	0	0	0	0	0	0	0	0	0	0	0
	1153	0	0	0	0	0	0	0	0	0	0	0	0	0	0	0	0	0	0	0	0
	1154	0	0	0	0	0	0	0	0	0	0	0	0	0	0	0	0	0	0	0	0
	1155	0	0	0	0	0	0	0	0	0	0	0	0	0	0	0	0	0	0	0	0
	1156	0	0	0	0	0	0	0	0	0	0	0	0	0	0	0	0	0	0	0	0
	1157	0	0	0	0	0	0	0	0	0	0	0	0	0	0	0	0	0	0	0	0
	1158	0	0	0	0	0	0	0	0	0	0	0	0	0	0	0	0	0	0	0	0
	1159	0	0	0	0	0	0	0	0	0	0	0	0	0	0	0	0	0	0	0	0
	1160	0	0	0	0	0	0	0	0	0	0	0	0	0	0	0	0	0	0	0	0
	1161	0	0	0	0	0	0	0	0	0	0	0	0	0	0	0	0	0	0	0	0
	1162	0	0	0	0	0	0	0	0	0	0	0	0	0	0	0	0	0	0	0	0
	1163	0	0	0	0	0	0	0	0	0	0	0	0	0	0	0	0	0	0	0	0
	1164	0	0	0	0	0	0	0	0	0	0	0	0	0	0	0	0	0	0	0	0
	1165	0	0	0	0	0	0	0	0	0	0	0	0	0	0	0	0	0	0	0	0
	1166	0	0	0	0	0	0	0	0	0	0	0	0	0	0	0	0	0	0	0	0
	1167	0	0	0	0	0	0	0	0	0	0	0	0	0	0	0	0	0	0	0	0
	1168	0	0	0	0	0	0	0	0	0	0	0	0	0	0	0	0	0	0	0	0
	1169	0	0	0	0	0	0	0	0	0	0	0	0	0	0	0	0	0	0	0	0
	1170	0	0	0	0	0	0	0	0	0	0	0	0	0	0	0	0	0	0	0	0
	1171	0	0	0	0	0	0	0	0	0	0	0	0	0	0	0	0	0	0	0	0
	1172	0	0	0	0	0	0	0	0	0	0	0	0	0	0	0	0	0	0	0	0
	1173	0	0	0	0	0	0	0	0	0	0	0	0	0	0	0	0	0	0	0	0
	1174	0	0	0	0	0	0	0	0	0	0	0	0	0	0	0	0	0	0	0	0
	1175	0	0	0	0	0	0	0	0	0	0	0	0	0	0	0	0	0	0	0	0
	1176	0	0	0	0	0	0	0	0	0	0	0	0	0	0	0	0	0	0	0	0
	1177	0	0	0	0	0	0	0	0	0	0	0	0	0	0	0	0	0	0	0	0
	1178	0	0	0	0	0	0	0	0	0	0	0	0	0	0	0	0	0	0	0	0
	1179	0	0	0	0	0	0	0	0	0	0	0	0	0	0	0	0	0	0	0	0
	1180	0	0	0	0	0	0	0	0	0	0	0	0	0	0	0	0	0	0	0	0
	1181	0	0	0	0	0	0	0	0	0	0	0	0	0	0	0	0	0	0	0	0
	1182	0	0	0	0	0	0	0	0	0	0	0	0	0	0	0	0	0	0	0	0
	1183	0	0	0	0	0	0	0	0	0	0	0	0	0	0	0	0	0	0	0	0
	1184	0	0	0	0	0	0	0	0	0	0	0	0	0	0	0	0	0	0	0	0
	1185	0	0	0	0	0	0	0	0	0	0	0	0	0	0	0	0	0	0	0	0
	1186	0	0	0	0	0	0	0	0	0	0	0	0	0	0	0	0	0	0	0	0
	1187	0	0	0	0	0	0	0	0	0	0	0	0	0	0	0	0	0	0	0	0
	1188	0	0	0	0	0	0	0	0	0	0	0	0	0	0	0	0	0	0	0	0
	1189	0	0	0	0	0	0	0	0	0	0	0	0	0	0	0	0	0	0	0	0
	1190	0	0	0	0	0	0	0	0	0	0	0	0	0	0	0	0	0	0	0	0
	1191	0	0	0	0	0	0	0	0	0	0	0	0	0	0	0	0	0	0	0	0
	1192	0	0	0	0	0	0	0	0	0	0	0	0	0	0	0	0	0	0	0	0
	1193	0	0	0	0	0	0	0	0	0	0	0	0	0	0	0	0	0	0	0	0
	1194	0	0	0	0	0	0	0	0	0	0	0	0	0	0	0	0	0	0	0	0
	1195	0	0	0	0	0	0	0	0	0	0	0	0	0	0	0	0	0	0	0	0
	1196	0	0	0	0	0	0	0	0	0	0	0	0	0	0	0	0	0	0	0	0
	1197	0	0	0	0	0	0	0	0	0	0	0	0	0	0	0	0	0	0	0	0
	1198	0	0	0	0	0	0	0	0	0	0	0	0	0	0	0	0	0	0	0	0
	1199	0	0	0	0	0	0	0	0	0	0	0	0	0	0	0	0	0	0	0	0
	1200	0	0	0	0	0	0	0	0	0	0	0	0	0	0	0	0	0	0	0	0
	1201	0	0	0	0	0	0	0	0	0	0	0	0	0	0	0	0	0	0	0	0
	1202	0	0	0	0	0	0	0	0	0	0	0	0	0	0	0	0	0	0	0	0
	1203	0	0	0	0	0	0	0	0	0	0	0	0	0	0	0	0	0	0	0	0
	1204	0	0	0	0	0	0	0	0	0	0	0	0	0	0	0	0	0	0	0	0
	1205	0	0	0	0	0	0	0	0	0	0	0	0	0	0	0	0	0	0	0	0
	1206	0	0	0	0	0	0	0	0	0	0	0	0	0	0	0	0	0	0	0	0
	1207	0	0	0	0	0	0	0	0	0	0	0	0	0	0	0	0	0	0	0	0
	1208	0	0	0	0	0	0	0	0	0	0	0	0	0	0	0	0	0	0	0	0
	1209	0	0	0	0	0	0	0	0	0	0	0	0	0	0	0	0	0	0	0	0
	1210	0	0	0	0	0	0	0	0	0	0	0	0	0	0	0	0	0	0	0	0
	1211	0	0	0	0	0	0	0	0	0	0	0	0	0	0	0	0	0	0	0	0
	1212	0	0	0	0	0	0	0	0	0	0	0	0	0	0	0	0	0	0	0	0
	1213	0	0	0	0	0	0	0	0	0	0	0	0	0	0	0	0	0	0	0	0										0	0	0	0	0	0	0	0	0	0	0	0	0	0	0	0	0	0	0
	1214	0	0	0	0	0	0	0	0	0	0	0	0	0	0	0	0	0	0	0	0										0	0	0	0	0	0	0	0	0	0	0	0	0	0	0	0	0	0	0
	1215	0	0	0	0	0	0	0	0	0	0	0	0	0	0	0	0	0	0	0	0										0	0	0	0	0	0	0	0	0	0	0	0	0	0	0	0	0	0	0
	1216	0	0	0	0	0	0	0	0	0	0	0	0	0	0	0	0	0	0	0	0										0	0	0	0	0	0	0	0	0	0	0	0	0	0	0	0	0	0	0
	SKEWIZATION VALUE	1000000	1000000	1000000	1000000	1000000	1000000	1000000	1000000	1000000	1000000	1000000	1000000	1000000	1000000	1000000	1000000	1000000	1000000	1000000	1000000										#VALUE!	#VALUE!	#VALUE!	#VALUE!	#VALUE!	#VALUE!	#VALUE!	#VALUE!	#VALUE!	#VALUE!	#VALUE!	#VALUE!	#VALUE!	#VALUE!	#VALUE!	#VALUE!	#VALUE!	#VALUE!	#VALUE!
SUM	608.5	1001834	1001834	1001834	1001834	1001834	1001834	1001834	1001834	1001834	1001834	1001834	1001834	1001834	1001834	1001834	1001834	1001834	1001834	1001834	1001834									571915	41038514	40038514	39038514	38038514	37038514	36038514	35038514	34038514	33038514	32038514	31038514	30038514	29038514	28038514	27038514	26038514	25038514	24038514	23038514
CN X SUM OF ELEM.		21038514	21038514	21038514	21038514	21038514	21038514	21038514	21038514	21038514	21038514	21038514	21038514	21038514	21038514	21038514	21038514	21038514	21038514	21038514	21038514
		7	8	9	10	11	12	13	14	15	16	17	18	19	20	21	22	23	24	25	26
	SC	0.512653	0.525457	0.538917	0.553085	0.568017	0.583779	0.60044	0.61808	0.636788	0.656663	0.67782	0.700385	0.724504	0.750343	0.778094	0.807977	0.840246	0.8752	0.913189	0.954625
[truncated: 3 more columns]

## Sheet: Graph Models
		Kc			PSim.																															Kc			PSim.
	1	1.00519		1	97.9552																														1	0.994862		1	97.9552
	2	1.00493		2	98.0565																														2	0.995117		2	98.0565
	3	1.00467		3	98.1578																														3	0.995373		3	98.1578
	4	1.00441		4	98.2593																														4	0.995629		4	98.2593
	5	1.00415		5	98.3608																														5	0.995885		5	98.3608
	6	1.00389		6	98.4625																														6	0.996141		6	98.4625
	7	1.00363		7	98.5642																														7	0.996398		7	98.5642
	8	1.00337		8	98.6661																														8	0.996654		8	98.6661
	9	1.00311		9	98.7681																														9	0.996911		9	98.7681
	10	1.00285		10	98.8702																														10	0.997167		10	98.8702
	11	1.00259		11	98.9724																														11	0.997424		11	98.9724
	12	1.00233		12	99.0746																														12	0.997681		12	99.0746
	13	1.00207		13	99.177																														13	0.997938		13	99.177
	14	1.00181		14	99.2795																														14	0.998196		14	99.2795
	15	1.00155		15	99.3821																														15	0.998453		15	99.3821
	16	1.00129		16	99.4849																														16	0.99871		16	99.4849
	17	1.00103		17	99.5877																														17	0.998968		17	99.5877
	18	1.00078		18	99.6906																														18	0.999226		18	99.6906
	19	1.00052		19	99.7936																														19	0.999484		19	99.7936
	20	1.00026		20	99.8968																														20	0.999742		20	99.8968
	20.1			20.1																															20.1			20.1
	21	1.01297		21	95.0049																														21	0.987354		21	95.0049
	22	1.01232		22	95.2487																														22	0.987979		22	95.2487
	23	1.01166		23	95.4931																														23	0.988604		23	95.4931
	24	1.01101		24	95.7382																														24	0.989231		24	95.7382
	25	1.01035		25	95.9838																														25	0.989858		25	95.9838
	26	1.0097		26	96.2301																														26	0.990486		26	96.2301
	27	1.00905		27	96.477																														27	0.991114		27	96.477
	28	1.00839		28	96.7245																														28	0.991744		28	96.7245
	29	1.00774		29	96.9727																														29	0.992374		29	96.9727
	30	1.00709		30	97.2215																														30	0.993005		30	97.2215
	31	1.00645		31	97.4709																														31	0.993637		31	97.4709
	32	1.0058		32	97.7209																														32	0.99427		32	97.7209
	33	1.00515		33	97.9716																														33	0.994903		33	97.9716
	34	1.0045		34	98.2229																														34	0.995537		34	98.2229
	35	1.00386		35	98.4748																														35	0.996172		35	98.4748
	36	1.00321		36	98.7274																														36	0.996808		36	98.7274
	37	1.00257		37	98.9806																														37	0.997445		37	98.9806
	38	1.00192		38	99.2345																														38	0.998083		38	99.2345
	39	1.00128		39	99.489																														39	0.998721		39	99.489
	40	1.00064		40	99.7442																														40	0.99936		40	99.7442
	41	1.02593		41	90.3763																														41	0.975348		41	90.3763
	42	1.0246		42	90.8354																														42	0.976551		42	90.8354
	43	1.02328		43	91.2968																														43	0.977758		43	91.2968
	44	1.02196		44	91.7604																														44	0.978968		44	91.7604
	45	1.02064		45	92.2262																														45	0.98018		45	92.2262
	46	1.01932		46	92.6943																														46	0.981396		46	92.6943
	47	1.01801		47	93.1647																														47	0.982615		47	93.1647
	48	1.0167		48	93.6374																														48	0.983836		48	93.6374
	49	1.0154		49	94.1125																														49	0.985061		49	94.1125
	50	1.0141		50	94.5898																														50	0.986289		50	94.5898
	51	1.0128		51	95.0695																														51	0.98752		51	95.0695
	52	1.0115		52	95.5516																														52	0.988754		52	95.5516
	53	1.01021		53	96.0361																														53	0.989991		53	96.0361
	54	1.00893		54	96.5229																														54	0.991231		54	96.5229
	55	1.00764		55	97.0122																														55	0.992474		55	97.0122
	56	1.00636		56	97.504																														56	0.993721		56	97.504
	57	1.00508		57	97.9982																														57	0.99497		57	97.9982
	58	1.00381		58	98.4949																														58	0.996223		58	98.4949
	59	1.00253		59	98.9941																														59	0.997479		59	98.9941
	60	1.00127		60	99.4958																														60	0.998738		60	99.4958
	61	1.05179		61	82.0684																														61	0.953067		61	82.0684
	62	1.04908		62	82.8883																														62	0.955309		62	82.8883
	63	1.04638		63	83.7156																														63	0.957561		63	83.7156
	64	1.04369		64	84.5504																														64	0.959824		64	84.5504
	65	1.04101		65	85.3928																														65	0.962098		65	85.3928
	66	1.03835		66	86.2429																														66	0.964382		66	86.2429
	67	1.0357		67	87.1009																														67	0.966678		67	87.1009
	68	1.03307		68	87.9669																														68	0.968984		68	87.9669
	69	1.03045		69	88.8408																														69	0.971301		69	88.8408
	70	1.02784		70	89.723																														70	0.97363		70	89.723
	71	1.02524		71	90.6134																														71	0.97597		71	90.6134
	72	1.02266		72	91.5122																														72	0.978321		72	91.5122
	73	1.02009		73	92.4196																														73	0.980683		73	92.4196
	74	1.01754		74	93.3356																														74	0.983057		74	93.3356
	75	1.01499		75	94.2603																														75	0.985442		75	94.2603
	76	1.01246		76	95.1939																														76	0.987839		76	95.1939
	77	1.00995		77	96.1366																														77	0.990247		77	96.1366
	78	1.00744		78	97.0884																														78	0.992668		78	97.0884
	79	1.00495		79	98.0494																														79	0.9951		79	98.0494
	80	1.00247		80	99.0199																														80	0.997544		80	99.0199
	81	1.50615		81	19.6093																														81	0.748472		81	19.6093
	82	1.46897		82	22.0625																														82	0.758005		82	22.0625
	83	1.43359		83	24.6184																														83	0.767784		83	24.6184
	84	1.39987		84	27.2836																														84	0.777818		84	27.2836
	85	1.3677		85	30.0653																														85	0.788119		85	30.0653
	86	1.33697		86	32.9714																														86	0.798696		86	32.9714
	87	1.3076		87	36.0102																														87	0.80956		87	36.0102
	88	1.27949		88	39.1912																														88	0.820724		88	39.1912
	89	1.25256		89	42.5246																														89	0.832201		89	42.5246
	90	1.22674		90	46.0215																														90	0.844003		90	46.0215
	91	1.20196		91	49.6944																														91	0.856144		91	49.6944
	92	1.17817		92	53.5568																														92	0.86864		92	53.5568
	93	1.1553		93	57.6238																														93	0.881506		93	57.6238
	94	1.1333		94	61.912																														94	0.894759		94	61.912
	95	1.11212		95	66.4401																														95	0.908417		95	66.4401
	96	1.09172		96	71.2288																														96	0.922497		96	71.2288
	97	1.07205		97	76.3012																														97	0.937022		97	76.3012
	98	1.05308		98	81.6833																														98	0.952011		98	81.6833
	99	1.03477		99	87.4044																														99	0.967487		99	87.4044
	100	1.01709		100	93.4974																														100	0.983475		100	93.4974
	101	5.12252		101	-23.3589																														101	0.554083		101	-23.3589
	102	4.24709		102	-20.9201																														102	0.566719		102	-20.9201
	103	3.6272		103	-18.321																														103	0.579944		103	-18.321
	104	3.16522		104	-15.5453																														104	0.593801		104	-15.5453
	105	2.80762		105	-12.5742																														105	0.608337		105	-12.5742
	106	2.52263		106	-9.38645																														106	0.623602		106	-9.38645
	107	2.29016		107	-5.95746																														107	0.639653		107	-5.95746
	108	2.09692		108	-2.25874																														108	0.656552		108	-2.25874
	109	1.93375		109	1.74284																														109	0.674368		109	1.74284
	110	1.79414		110	6.08605																														110	0.693178		110	6.08605
	111	1.67334		111	10.8166																														111	0.713067		111	10.8166
	112	1.56777		112	15.9887																														112	0.734132		112	15.9887
	113	1.47474		113	21.6673																														113	0.756479		113	21.6673
	114	1.39213		114	27.9305																														114	0.780229		114	27.9305
	115	1.31828		115	34.8736																														115	0.805519		115	34.8736
	116	1.25187		116	42.6135																														116	0.832504		116	42.6135
	117	1.19183		117	51.2958																														117	0.861359		117	51.2958
	118	1.13729		118	61.1039																														118	0.892285		118	61.1039
	119	1.08752		119	72.2717																														119	0.925516		119	72.2717
	120	1.04193		120	85.1032																														120	0.961317		120	85.1032
	121	15.439		121	-30.3247																														121	0.516735		121	-30.3247
	122	8.96599		122	-27.9781																														122	0.52953		122	-27.9781
	123	6.31736		123	-25.468																														123	0.542975		123	-25.468
	124	4.87673		124	-22.7766																														124	0.55712		124	-22.7766
	125	3.97114		125	-19.8835																														125	0.572022		125	-19.8835
	126	3.3492		126	-16.7653																														126	0.587744		126	-16.7653
	127	2.8957		127	-13.3944																														127	0.604354		127	-13.3944
	128	2.55036		128	-9.73904																														128	0.62193		128	-9.73904
	129	2.27862		129	-5.76149																														129	0.640559		129	-5.76149
	130	2.05921		130	-1.41721																														130	0.660338		130	-1.41721
	131	1.87834		131	3.34695																														131	0.681378		131	3.34695
	132	1.72668		132	8.59497																														132	0.703803		132	8.59497
	133	1.59768		133	14.4045																														133	0.727754		133	14.4045
	134	1.48661		134	20.8707																														134	0.753392		134	20.8707
	135	1.38999		135	28.1117																														135	0.780903		135	28.1117
	136	1.30515		136	36.2756																														136	0.810499		136	36.2756
	137	1.23008		137	45.5507																														137	0.842427		137	45.5507
	138	1.16318		138	56.1806																														138	0.876974		138	56.1806
	139	1.10317		139	68.4855																														139	0.914476		139	68.4855
	140	1.04906		140	82.8951																														140	0.955328		140	82.8951
	141	20.2583		141	-31.0648																														141	0.512653		141	-31.0648
	142	10.3205		142	-28.7295																														142	0.525457		142	-28.7295
	143	6.92395		143	-26.2305																														143	0.538917		143	-26.2305
	144	5.20947		144	-23.5498																														144	0.553085		144	-23.5498
	145	4.17554		145	-20.667																														145	0.568017		145	-20.667
	146	3.48405		146	-17.5583																														146	0.583779		146	-17.5583
	147	2.98906		147	-14.196																														147	0.60044		147	-14.196
	148	2.61721		148	-10.5477																														148	0.61808		148	-10.5477
	149	2.32765		149	-6.57545																														149	0.636788		149	-6.57545
	150	2.09578		150	-2.23401																														150	0.656663		150	-2.23401
	151	1.90592		151	2.53058																														151	0.67782		151	2.53058
	152	1.7476		152	7.78338																														152	0.700385		152	7.78338
	153	1.61357		153	13.6034																														153	0.724504		153	13.6034
	154	1.49863		154	20.0879																														154	0.750343		154	20.0879
	155	1.39898		155	27.3575																														155	0.778094		155	27.3575
	156	1.31175		156	35.5639																														156	0.807977		156	35.5639
	157	1.23476		157	44.9008																														157	0.840246		157	44.9008
	158	1.16631		158	55.6189																														158	0.8752		158	55.6189
	159	1.10505		159	68.0492																														159	0.913189		159	68.0492
	160	1.0499		160	82.6378																														160	0.954625		160	82.6378
	161	20.9233		161	-31.1393																														161	0.512241		161	-31.1393
	162	10.4817		162	-28.8052																														162	0.525046		162	-28.8052
	163	6.99231		163	-26.3073																														163	0.538507		163	-26.3073
	164	5.24591		164	-23.6277																														164	0.552677		164	-23.6277
	165	4.19754		165	-20.7459																														165	0.567613		165	-20.7459
	166	3.4984		166	-17.6382																														166	0.583378		166	-17.6382
	167	2.9989		167	-14.2767																														167	0.600044		167	-14.2767
	168	2.62422		168	-10.6292																														168	0.61769		168	-10.6292
	169	2.33276		169	-6.65754																														169	0.636406		169	-6.65754
	170	2.09958		170	-2.31642																														170	0.656291		170	-2.31642
	171	1.90877		171	2.44819																														171	0.677459		171	2.44819
	172	1.74976		172	7.70142																														172	0.700039		172	7.70142
	173	1.6152		173	13.5225																														173	0.724175		173	13.5225
	174	1.49986		174	20.0088																														174	0.750034		174	20.0088
	175	1.3999		175	27.2812																														175	0.777809		175	27.2812
	176	1.31242		176	35.4919																														176	0.807721		176	35.4919
	177	1.23524		177	44.8349																														177	0.840025		177	44.8349
	178	1.16663		178	55.5619																														178	0.87502		178	55.5619
	179	1.10524		179	68.0049																														179	0.913058		179	68.0049
	180	1.04999		180	82.6116																														180	0.954553		180	82.6116
	181	20.9923		181	-31.1467																														181	0.5122		181	-31.1467
	182	10.4982		182	-28.8127																														182	0.525005		182	-28.8127
	183	6.99923		183	-26.3149																														183	0.538466		183	-26.3149
	184	5.24959		184	-23.6355																														184	0.552636		184	-23.6355
	185	4.19975		185	-20.7538																														185	0.567572		185	-20.7538
	186	3.49984		186	-17.6462																														186	0.583338		186	-17.6462
	187	2.99989		187	-14.2848																														187	0.600004		187	-14.2848
	188	2.62492		188	-10.6374																														188	0.617651		188	-10.6374
	189	2.33328		189	-6.66575																														189	0.636368		189	-6.66575
	190	2.09996		190	-2.32466																														190	0.656254		190	-2.32466
	191	1.90906		191	2.43994																														191	0.677423		191	2.43994
	192	1.74998		192	7.69322																														192	0.700004		192	7.69322
	193	1.61537		193	13.5144																														193	0.724142		193	13.5144
	194	1.49999		194	20.0009																														194	0.750003		194	20.0009
	195	1.39999		195	27.2736																														195	0.777781		195	27.2736
	196	1.31249		196	35.4847																														196	0.807695		196	35.4847
	197	1.23529		197	44.8283																														197	0.840002		197	44.8283
	198	1.16666		198	55.5562																														198	0.875002		198	55.5562
	199	1.10526		199	68.0005																														199	0.913045		199	68.0005
	200	1.05		200	82.609																														200	0.954546		200	82.609
	201	20.9992		201	-31.1475																														201	0.512196		201	-31.1475
	202	10.4998		202	-28.8135																														202	0.525		202	-28.8135
	203	6.99992		203	-26.3157																														203	0.538462		203	-26.3157
	204	5.24996		204	-23.6363																														204	0.552632		204	-23.6363
	205	4.19998		205	-20.7546																														205	0.567568		205	-20.7546
	206	3.49998		206	-17.647																														206	0.583334		206	-17.647
	207	2.99999		207	-14.2856																														207	0.6		207	-14.2856
	208	2.62499		208	-10.6382																														208	0.617647		208	-10.6382
	209	2.33333		209	-6.66658																														209	0.636364		209	-6.66658
	210	2.1		210	-2.32549																														210	0.65625		210	-2.32549
	211	1.90909		211	2.43912																														211	0.67742		211	2.43912
	212	1.75		212	7.6924																														212	0.7		212	7.6924
	213	1.61538		213	13.5136																														213	0.724138		213	13.5136
	214	1.5		214	20.0001																														214	0.75		214	20.0001
	215	1.4		215	27.2728																														215	0.777778		215	27.2728
	216	1.3125		216	35.484																														216	0.807693		216	35.484
	217	1.23529		217	44.8277																														217	0.84		217	44.8277
	218	1.16667		218	55.5556																														218	0.875		218	55.5556
	219	1.10526		219	68																														219	0.913044		219	68
	220	1.05		220	82.6087																														220	0.954546		220	82.6087
	220.1			220.1																															220.1			220.1
	221	20.9999		221	-31.1475																														221	0.512195		221	-31.1475
	222	10.5		222	-28.8136																														222	0.525		222	-28.8136
	223	6.99999		223	-26.3158																														223	0.538462		223	-26.3158
	224	5.25		224	-23.6364																														224	0.552632		224	-23.6364
	225	4.2		225	-20.7547																														225	0.567568		225	-20.7547
	226	3.5		226	-17.647																														226	0.583333		226	-17.647
	227	3		227	-14.2857																														227	0.6		227	-14.2857
	228	2.625		228	-10.6383																														228	0.617647		228	-10.6383
	229	2.33333		229	-6.66666																														229	0.636364		229	-6.66666
	230	2.1		230	-2.32557																														230	0.65625		230	-2.32557
	231	1.90909		231	2.43903																														231	0.677419		231	2.43903
	232	1.75		232	7.69232																														232	0.7		232	7.69232
	233	1.61538		233	13.5135																														233	0.724138		233	13.5135
	234	1.5		234	20																														234	0.75		234	20
	235	1.4		235	27.2727																														235	0.777778		235	27.2727
	236	1.3125		236	35.4839																														236	0.807692		236	35.4839
	237	1.23529		237	44.8276																														237	0.84		237	44.8276
	238	1.16667		238	55.5556																														238	0.875		238	55.5556
	239	1.10526		239	68																														239	0.913043		239	68
	240	1.05		240	82.6087																														240	0.954545		240	82.6087
